# Supplementary material for: Light intensity defines growth and photopigment content of a mixed culture of purple phototrophic bacteria
Source: Front Microbiol. 2022 Oct 19;13:1014695. doi: 10.3389/fmicb.2022.1014695 (PMC9628752; doi:10.3389/fmicb.2022.1014695)
Supplement: Supplementary file 2 [file Data_Sheet_1.XLSX]

## Sheet: Sheet1
Protein Group	Protein ID	Accession (top accession only, for taxa refer to genus and family names)	Significance	Coverage (%)	#Peptides	#Unique	Sample 1 Area (top-3 peptides)	Sample 2 Area (top-3 peptides)	Sample 3 Area (top-3 peptides)	Sample 4 Area (top-3 peptides)	Sample 5 Area (top-3 peptides)	Sample 6 Area (top-3 peptides)	Sample 7 Area (top-3 peptides)	Sample 8 Area (top-3 peptides)	Sample 9 Area (top-3 peptides)	Sample 10 Area (top-3 peptides)	Sample 11 Area (top-3 peptides)	Sample 12 Area (top-3 peptides)	Sample Profile (Ratio)	A Area (top-3 peptides)	B Area (top-3 peptides)	C Area (top-3 peptides)	Group Profile (Ratio)	Avg. Mass	family_name (LCA)	genus_name (LCA)	Description (ONLY FUNCTION, SPECIES NAME NOT ACCURATE, REFER TO GENUS AND FAMILY NAMES)
21	532	tr|A0A318TSW4|A0A318TSW4_9BRAD	53.18	100	17	17	777000000	786000000	415000000	450000000	495000000	551000000	764000000	727000000	15200000000	14300000000	12600000000	13300000000	1.57:1.59:0.84:0.91:1.00:1.11:1.54:1.47:30.62:28.97:25.53:26.92	607000000	635000000	13900000000	0.96:1.00:21.85	9185	Bradyrhizobiaceae	Rhodopseudomonas	Uncharacterized protein OS=Rhodopseudomonas faecalis OX=99655 GN=BJ122_11086 PE=4 SV=1
415	834	tr|A0A318TD44|A0A318TD44_9BRAD	66.3	60	18	18	210000000	228000000	167000000	165000000	222000000	209000000	155000000	167000000	3970000000	3790000000	3030000000	3510000000	0.95:1.03:0.75:0.74:1.00:0.95:0.70:0.75:17.93:17.08:13.67:15.86	193000000	194000000	3580000000	1.00:1.00:18.47	27726	Bradyrhizobiaceae	Rhodopseudomonas	Photosynthetic reaction center H subunit OS=Rhodopseudomonas faecalis OX=99655 GN=BJ122_110138 PE=4 SV=1
652	429	tr|A0A5M6I5F7|A0A5M6I5F7_9RHIZ	81.57	33	9	9	206000000	212000000	219000000	212000000	999000000	990000000	1150000000	1160000000	3050000000	3060000000	2950000000	2760000000	0.21:0.21:0.22:0.21:1.00:0.99:1.15:1.16:3.05:3.06:2.95:2.76	212000000	1070000000	2950000000	0.20:1.00:2.75	39207	Blastochloridaceae	Blastochloris	Photosynthetic reaction center cytochrome c subunit OS=Blastochloris sulfoviridis OX=50712 GN=F1193_02075 PE=4 SV=1
627	3263	tr|A0A318TFD5|A0A318TFD5_9BRAD	47.9	49	7	5	160000000	149000000	114000000	113000000	47400000	78600000	163000000	146000000	2010000000	1980000000	1850000000	1930000000	3.38:3.14:2.41:2.38:1.00:1.66:3.45:3.09:42.36:41.79:39.02:40.79	135000000	120000000	1940000000	1.12:1.00:16.12	15507	Bradyrhizobiaceae	Rhodopseudomonas	Single cache domain-containing protein OS=Rhodopseudomonas faecalis OX=99655 GN=BJ122_10790 PE=4 SV=1
2773	2359	tr|A0A5M6I4B1|A0A5M6I4B1_9RHIZ	65.88	17	4	4	147000000	147000000	176000000	183000000	663000000	746000000	724000000	842000000	1800000000	1860000000	1870000000	1610000000	0.22:0.22:0.27:0.28:1.00:1.12:1.09:1.27:2.71:2.80:2.82:2.43	164000000	749000000	1790000000	0.22:1.00:2.38	37063	Blastochloridaceae	Blastochloris	Reaction center protein M chain OS=Blastochloris sulfoviridis OX=50712 GN=pufM PE=3 SV=1
3400	32710	tr|Q6N3M1|Q6N3M1_RHOPA	42.7	39	3	2	243000000	206000000	155000000	143000000	177000000	125000000	247000000	239000000	1580000000	1430000000	1330000000	1530000000	1.38:1.17:0.88:0.81:1.00:0.71:1.40:1.35:8.93:8.08:7.54:8.68	187000000	197000000	1470000000	0.95:1.00:7.46	9073	Bradyrhizobiaceae	Rhodopseudomonas	Cold shock DNA binding protein OS=Rhodopseudomonas palustris (strain ATCC BAA-98 / CGA009) OX=258594 GN=cspA5 PE=4 SV=1
473	1572	tr|A0A5M6I5M5|A0A5M6I5M5_9RHIZ	57.92	47	11	10	123000000	174000000	153000000	152000000	510000000	536000000	591000000	616000000	1440000000	1480000000	1540000000	1570000000	0.24:0.34:0.30:0.30:1.00:1.05:1.16:1.21:2.81:2.89:3.02:3.07	150000000	563000000	1510000000	0.27:1.00:2.67	28731	Blastochloridaceae	Blastochloris	Photosynthetic reaction center subunit H OS=Blastochloris sulfoviridis OX=50712 GN=puhA PE=4 SV=1
230	23041	tr|A0A318TJ39|A0A318TJ39_9BRAD	38.36	73	11	11	36300000	23900000	10000000	4240000	5970000	15500000	3090000	7350000	1120000000	1190000000	817000000	871000000	6.07:4.01:1.68:0.71:1.00:2.60:0.52:1.23:64.00:64.00:64.00:64.00	22700000	11900000	1230000000	1.91:1.00:64.00	22634	Bradyrhizobiaceae	Rhodopseudomonas	Superoxide dismutase OS=Rhodopseudomonas faecalis OX=99655 GN=BJ122_10833 PE=3 SV=1
3501	11131	tr|A0A318TDG1|A0A318TDG1_9BRAD	42.51	22	4	3	57100000	75300000	51200000	55500000	104000000	89800000	52200000	46100000	1100000000	1160000000	632000000	694000000	0.55:0.73:0.49:0.53:1.00:0.87:0.50:0.44:10.56:11.15:6.09:6.69	59900000	73000000	895000000	0.82:1.00:12.25	34235	Bradyrhizobiaceae	Rhodopseudomonas	Reaction center protein M chain OS=Rhodopseudomonas faecalis OX=99655 GN=BJ122_110121 PE=3 SV=1
2419	2075	tr|Q07RZ1|Q07RZ1_RHOP5	61.07	27	6	2	87900000	97300000	76700000	73600000	55900000	68100000	46200000	55900000	843000000	831000000	907000000	816000000	1.57:1.74:1.37:1.32:1.00:1.22:0.83:1.00:15.09:14.87:16.24:14.61	84000000	56500000	849000000	1.49:1.00:15.03	15474	Bradyrhizobiaceae	Rhodopseudomonas	Cytochrome c class I OS=Rhodopseudomonas palustris (strain BisA53) OX=316055 GN=RPE_1341 PE=4 SV=1
1378	3876	tr|A0A348G5I2|A0A348G5I2_9RHIZ	59.47	44	7	7	46000000	55900000	38500000	34900000	170000000	151000000	159000000	199000000	751000000	669000000	850000000	784000000	0.27:0.33:0.23:0.20:1.00:0.89:0.93:1.17:4.41:3.93:4.99:4.60	43800000	170000000	763000000	0.26:1.00:4.50	19782	Blastochloridaceae	Blastochloris	Uncharacterized protein OS=Blastochloris tepida OX=2233851 GN=BLTE_35000 PE=4 SV=1
2781	5028	tr|A0A1H3B227|A0A1H3B227_ALLWA	59.08	17	3	3	40600000	39500000	49400000	36500000	40500000	45800000	32100000	11400000	699000000	792000000	694000000	948000000	1.00:0.98:1.22:0.90:1.00:1.13:0.79:0.28:17.29:19.57:17.15:23.43	42000000	39400000	784000000	1.07:1.00:19.91	23853	Chromatiaceae	Allochromatium	ATP-dependent Clp protease proteolytic subunit OS=Allochromatium warmingii OX=61595 GN=clpP PE=3 SV=1
231	20842	tr|A0A318TIH6|A0A318TIH6_9BRAD	77.93	60	14	14	6100000	6430000	6630000	6980000	968000	1340000	4290000	1390000	655000000	598000000	526000000	604000000	6.30:6.65:6.85:7.21:1.00:1.38:4.43:1.44:64.00:64.00:64.00:64.00	6560000	2230000	868000000	2.94:1.00:64.00	33335	Bradyrhizobiaceae	Rhodopseudomonas	Iron complex transport system substrate-binding protein OS=Rhodopseudomonas faecalis OX=99655 GN=BJ122_106101 PE=4 SV=1
2281	2092	tr|A0A0H5B8I5|A0A0H5B8I5_BLAVI	34.38	78	5	4	114000000	74800000	51500000	54200000	217000000	182000000	319000000	296000000	650000000	718000000	714000000	674000000	0.53:0.34:0.24:0.25:1.00:0.84:1.47:1.37:2.99:3.31:3.29:3.11	73700000	254000000	690000000	0.29:1.00:2.72	7225	Blastochloridaceae	Blastochloris	Cold shock protein CspA OS=Blastochloris viridis OX=1079 GN=cspB PE=4 SV=1
9	121	tr|A0A318TIK0|A0A318TIK0_9BRAD	37.22	79	30	12	148000000	151000000	68800000	69300000	43100000	41600000	71800000	67600000	508000000	439000000	515000000	472000000	3.42:3.50:1.60:1.61:1.00:0.96:1.67:1.57:11.78:10.18:11.95:10.96	109000000	56000000	484000000	1.95:1.00:8.63	48231	Bradyrhizobiaceae	Rhodopseudomonas	Amino acid/amide ABC transporter substrate-binding protein (HAAT family) OS=Rhodopseudomonas faecalis OX=99655 GN=BJ122_103168 PE=4 SV=1
221	20774	tr|A0A318TFK1|A0A318TFK1_9BRAD	26.83	54	16	10	4260000	28500	266000	190000	7880000	9300000	583000	456000	507000000	529000000	472000000	469000000	0.54:0.02:0.03:0.02:1.00:1.18:0.07:0.06:64.00:64.00:59.94:59.57	1190000	4580000	494000000	0.26:1.00:64.00	36645	Bradyrhizobiaceae	Rhodopseudomonas	Iron(III) transport system substrate-binding protein OS=Rhodopseudomonas faecalis OX=99655 GN=BJ122_11160 PE=4 SV=1
3168	1895	tr|A0A318TI44|A0A318TI44_9BRAD	43.85	18	4	4	51800000	45100000	23800000	24200000	21700000	21300000	35000000	32000000	494000000	452000000	464000000	455000000	2.39:2.08:1.10:1.12:1.00:0.98:1.62:1.48:22.82:20.87:21.42:21.02	36200000	27500000	466000000	1.32:1.00:16.97	22731	Bradyrhizobiaceae	Rhodopseudomonas	Uncharacterized protein OS=Rhodopseudomonas faecalis OX=99655 GN=BJ122_11085 PE=4 SV=1
558	23098	tr|A0A318TFZ5|A0A318TFZ5_9BRAD	31.23	59	9	8	1770000	1200000	1260000	7560	0	540000	420000	124000	467000000	270000000	399000000	430000000	64.00:64.00:64.00:64.00:-:64.00:64.00:64.00:64.00:64.00:64.00:64.00	1410000	591000	440000000	2.39:1.00:64.00	18734	Bradyrhizobiaceae	Rhodopseudomonas	Heme utilization protein HuvX OS=Rhodopseudomonas faecalis OX=99655 GN=BJ122_10695 PE=4 SV=1
1175	11526	tr|A0A348FXP3|A0A348FXP3_9RHIZ	49.97	52	8	8	7760000	9920000	6470000	5590000	77800000	74200000	109000000	99600000	420000000	419000000	437000000	420000000	0.10:0.13:0.08:0.07:1.00:0.95:1.40:1.28:5.40:5.39:5.62:5.39	7470000	90100000	424000000	0.08:1.00:4.70	18487	Blastochloridaceae	Blastochloris	Phasin_2 domain-containing protein OS=Blastochloris tepida OX=2233851 GN=BLTE_07610 PE=4 SV=1
547	23004	tr|A0A318TKE8|A0A318TKE8_9BRAD	63.68	69	9	8	21700000	24500000	18700000	20300000	8110000	7550000	17800000	15900000	406000000	360000000	429000000	484000000	2.68:3.03:2.31:2.50:1.00:0.93:2.20:1.96:50.14:44.42:52.99:59.75	21500000	13200000	421000000	1.63:1.00:31.91	18593	Bradyrhizobiaceae	Rhodopseudomonas	Bacterioferritin OS=Rhodopseudomonas faecalis OX=99655 GN=BJ122_102350 PE=3 SV=1
733	21860	tr|A0A318TI61|A0A318TI61_9BRAD	19.8	52	11	11	144000	1030000	1430000	1330000	0	881000	252000	0	404000000	382000000	400000000	341000000	64.00:64.00:64.00:64.00:-:64.00:64.00:-:64.00:64.00:64.00:64.00	1760000	819000	382000000	2.15:1.00:64.00	23243	Bradyrhizobiaceae	Rhodopseudomonas	Putative NADH-flavin reductase OS=Rhodopseudomonas faecalis OX=99655 GN=BJ122_10698 PE=4 SV=1
1190	4961	tr|A0A5M6HMC8|A0A5M6HMC8_9RHIZ	49.83	37	7	7	40400000	40400000	54300000	52900000	132000000	131000000	83600000	90900000	400000000	435000000	372000000	394000000	0.31:0.31:0.41:0.40:1.00:0.99:0.64:0.69:3.04:3.31:2.82:3.00	47100000	109000000	401000000	0.43:1.00:3.67	13591	Blastochloridaceae	Blastochloris	Cytochrome c2 OS=Blastochloris sulfoviridis OX=50712 GN=F1193_15380 PE=4 SV=1
3754	30410	tr|A0A348FXH1|A0A348FXH1_9RHIZ	65.61	13	3	3	1440000	1620000	1000000	1070000	4900000	4860000	7840000	7680000	391000000	355000000	311000000	345000000	0.29:0.33:0.20:0.22:1.00:0.99:1.60:1.57:64.00:64.00:63.33:64.00	1280000	6320000	350000000	0.20:1.00:55.46	28199	Blastochloridaceae	Blastochloris	ABC transporter substrate-binding protein OS=Blastochloris tepida OX=2233851 GN=BLTE_06890 PE=4 SV=1
79	383	tr|A0A318TEC1|A0A318TEC1_9BRAD	43.33	47	16	9	90600000	102000000	74300000	71300000	42700000	46300000	77100000	85200000	380000000	362000000	289000000	370000000	2.12:2.38:1.74:1.67:1.00:1.08:1.80:1.99:8.90:8.47:6.76:8.65	84500000	62800000	350000000	1.35:1.00:5.57	59224	Bradyrhizobiaceae	Rhodopseudomonas	Flagellin-like hook-associated protein FlgL (Fragment) OS=Rhodopseudomonas faecalis OX=99655 GN=BJ122_1201 PE=4 SV=1
5003	7692	tr|A0A0R3N304|A0A0R3N304_9BRAD	52	18	2	2	68700000	56600000	21500000	27900000	24100000	16700000	23300000	22600000	358000000	376000000	341000000	323000000	2.85:2.35:0.89:1.16:1.00:0.69:0.97:0.94:14.87:15.60:14.16:13.42	43700000	21700000	355000000	2.01:1.00:16.34	18036	Bradyrhizobiaceae	Bradyrhizobium	Uncharacterized protein OS=Bradyrhizobium retamae OX=1300035 GN=CQ13_24925 PE=4 SV=1
2656	2248	tr|A0A2R4GWR5|A0A2R4GWR5_RHOPL	56.46	32	4	4	140000000	130000000	141000000	135000000	121000000	112000000	121000000	113000000	350000000	389000000	332000000	328000000	1.16:1.08:1.17:1.12:1.00:0.93:1.01:0.93:2.90:3.22:2.75:2.72	137000000	117000000	350000000	1.17:1.00:3.00	13687	Bradyrhizobiaceae	Rhodopseudomonas	RuBisCO_small domain-containing protein OS=Rhodopseudomonas palustris OX=1076 GN=RPYSC3_30420 PE=4 SV=1
1120	23267	tr|Q6N8C8|Q6N8C8_RHOPA	34.06	26	8	5	57500000	68100000	37300000	32900000	76000000	56100000	30700000	25000000	342000000	366000000	335000000	290000000	0.76:0.90:0.49:0.43:1.00:0.74:0.40:0.33:4.50:4.81:4.41:3.82	48900000	47000000	333000000	1.04:1.00:7.10	40121	Bradyrhizobiaceae	Rhodopseudomonas	Periplasmic mannitol-binding protein SmoM possible Trap-T transport system dctP subunit OS=Rhodopseudomonas palustris (strain ATCC BAA-98 / CGA009) OX=258594 GN=RPA1975 PE=3 SV=1
2404	25330	tr|A0A5M6I1J6|A0A5M6I1J6_9RHIZ	39.05	41	5	5	6210000	6600000	16400000	15800000	58400000	49400000	90200000	81800000	338000000	276000000	333000000	352000000	0.11:0.11:0.28:0.27:1.00:0.85:1.54:1.40:5.78:4.73:5.70:6.03	13500000	70200000	331000000	0.19:1.00:4.71	12264	Blastochloridaceae	Blastochloris	Phasin family protein OS=Blastochloris sulfoviridis OX=50712 GN=F1193_07540 PE=4 SV=1
5418	35607	tr|A0A318TAY0|A0A318TAY0_9BRAD	75.08	17	2	2	22600000	28700000	19300000	17000000	11100000	10400000	10800000	11700000	329000000	324000000	389000000	351000000	2.03:2.58:1.73:1.53:1.00:0.93:0.97:1.05:29.56:29.09:34.94:31.53	21900000	11000000	350000000	1.99:1.00:31.82	13335	Bradyrhizobiaceae	Rhodopseudomonas	Helix-hairpin-helix protein OS=Rhodopseudomonas faecalis OX=99655 GN=BJ122_11446 PE=4 SV=1
51	470	tr|A0A2R4GVS4|A0A2R4GVS4_RHOPL	52.04	43	25	17	18300000	23400000	32300000	31600000	34300000	34600000	26400000	25300000	314000000	310000000	238000000	224000000	0.53:0.68:0.94:0.92:1.00:1.01:0.77:0.74:9.15:9.03:6.95:6.52	26400000	30200000	271000000	0.87:1.00:9.00	53597	Bradyrhizobiaceae	Rhodopseudomonas	Ribulose bisphosphate carboxylase large chain OS=Rhodopseudomonas palustris OX=1076 GN=cbbL PE=3 SV=1
117	20621	tr|A0A318TLX9|A0A318TLX9_9BRAD	52.52	50	19	9	20800000	21900000	9920000	10600000	13500000	17800000	10300000	13100000	312000000	335000000	253000000	214000000	1.54:1.63:0.74:0.78:1.00:1.32:0.76:0.97:23.16:24.83:18.79:15.90	16500000	13800000	279000000	1.20:1.00:20.17	48128	Bradyrhizobiaceae	Rhodopseudomonas	Citrate synthase OS=Rhodopseudomonas faecalis OX=99655 GN=BJ122_101226 PE=3 SV=1
66	570	tr|A0A5M6HI13|A0A5M6HI13_9RHIZ	52.33	39	21	20	6370000	7530000	12100000	28200000	6350000	8120000	6020000	4900000	305000000	253000000	195000000	176000000	1.00:1.19:1.90:4.44:1.00:1.28:0.95:0.77:47.98:39.92:30.78:27.74	14000000	6340000	266000000	2.21:1.00:41.98	76727	Blastochloridaceae	Blastochloris	MBL fold metallo-hydrolase OS=Blastochloris sulfoviridis OX=50712 GN=F1193_16615 PE=4 SV=1
37	199	tr|A0A318TAN8|A0A318TAN8_9BRAD	44.32	62	20	14	137000000	135000000	82600000	87800000	46900000	43300000	55500000	50200000	288000000	327000000	212000000	276000000	2.92:2.88:1.76:1.87:1.00:0.92:1.18:1.07:6.15:6.97:4.53:5.89	111000000	49000000	277000000	2.26:1.00:5.65	44888	Bradyrhizobiaceae	Rhodopseudomonas	Amino acid/amide ABC transporter substrate-binding protein (HAAT family) OS=Rhodopseudomonas faecalis OX=99655 GN=BJ122_1375 PE=4 SV=1
194	458	tr|A0A0H5BP83|A0A0H5BP83_BLAVI	51.89	51	18	5	38800000	36500000	30200000	28400000	69000000	62200000	84700000	89500000	267000000	250000000	264000000	236000000	0.56:0.53:0.44:0.41:1.00:0.90:1.23:1.30:3.87:3.63:3.83:3.43	33500000	76400000	255000000	0.44:1.00:3.33	51198	Blastochloridaceae	Blastochloris	ATP synthase subunit beta OS=Blastochloris viridis OX=1079 GN=atpD PE=3 SV=1
256	2849	tr|A0A348FX67|A0A348FX67_9RHIZ	57.67	29	12	9	14900000	9760000	8820000	13100000	65400000	62300000	54600000	50100000	260000000	304000000	263000000	259000000	0.23:0.15:0.13:0.20:1.00:0.95:0.84:0.77:3.98:4.65:4.02:3.97	11900000	58300000	272000000	0.20:1.00:4.66	53261	Blastochloridaceae	Blastochloris	Uncharacterized protein OS=Blastochloris tepida OX=2233851 GN=BLTE_05850 PE=4 SV=1
2331	3623	tr|Q6N9P5|Q6N9P5_RHOPA	50.33	70	7	6	118000000	131000000	116000000	112000000	18400000	18400000	32100000	34100000	260000000	257000000	282000000	260000000	6.44:7.14:6.33:6.09:1.00:1.00:1.75:1.86:14.16:14.01:15.35:14.16	120000000	25700000	272000000	4.65:1.00:10.55	10836	Bradyrhizobiaceae	Rhodopseudomonas	Uncharacterized protein OS=Rhodopseudomonas palustris (strain ATCC BAA-98 / CGA009) OX=258594 GN=RPA1495 PE=4 SV=1
1131	2884	tr|A0A318TFD2|A0A318TFD2_9BRAD	44.41	63	7	7	46100000	32600000	27800000	25700000	16600000	10900000	26400000	25000000	256000000	277000000	306000000	223000000	2.77:1.96:1.67:1.54:1.00:0.66:1.59:1.50:15.40:16.68:18.40:13.40	33000000	19700000	266000000	1.67:1.00:13.45	14013	Bradyrhizobiaceae	Rhodopseudomonas	Phasin OS=Rhodopseudomonas faecalis OX=99655 GN=BJ122_11157 PE=4 SV=1
4937	64613	tr|A0A2T4J963|A0A2T4J963_RHOBL	48.36	57	2	2	34800000	37300000	44600000	41000000	140000	5580000	2580000	4910000	250000000	270000000	211000000	200000000	64.00:64.00:64.00:64.00:1.00:39.90:18.48:35.12:64.00:64.00:64.00:64.00	39400000	3650000	233000000	10.82:1.00:63.88	5409	Rhodobacteraceae	Rhodobacter	Antenna pigment protein beta chain OS=Rhodobacter blasticus DSM 2131 OX=1188250 GN=C5F44_10270 PE=3 SV=1
977	3726	tr|A0A5M6HTN6|A0A5M6HTN6_9RHIZ	43.86	60	9	7	21100000	22200000	16000000	9560000	16200000	17900000	30100000	26900000	248000000	296000000	306000000	291000000	1.30:1.37:0.99:0.59:1.00:1.10:1.85:1.66:15.27:18.22:18.84:17.93	17800000	23100000	305000000	0.77:1.00:13.22	18474	Blastochloridaceae	Blastochloris	Bacterioferritin OS=Blastochloris sulfoviridis OX=50712 GN=bfr PE=3 SV=1
168	3642	tr|A0A318TFE9|A0A318TFE9_9BRAD	59.7	50	20	12	116000000	133000000	80900000	84500000	46300000	42500000	43200000	50500000	239000000	229000000	237000000	215000000	2.50:2.87:1.75:1.82:1.00:0.92:0.93:1.09:5.17:4.95:5.13:4.64	105000000	49000000	230000000	2.15:1.00:4.70	71267	Bradyrhizobiaceae	Rhodopseudomonas	Transketolase OS=Rhodopseudomonas faecalis OX=99655 GN=BJ122_106136 PE=3 SV=1
2280	1894	tr|A0A318TSN4|A0A318TSN4_9BRAD	40.12	33	5	3	78500000	82800000	47800000	46400000	34600000	30900000	45600000	45100000	237000000	241000000	252000000	246000000	2.27:2.39:1.38:1.34:1.00:0.89:1.32:1.30:6.85:6.98:7.27:7.11	64300000	41200000	244000000	1.56:1.00:5.93	16690	Bradyrhizobiaceae	Rhodopseudomonas	Single cache domain-containing protein OS=Rhodopseudomonas faecalis OX=99655 GN=BJ122_10280 PE=4 SV=1
3490	2246	tr|Q6NAL1|Q6NAL1_RHOPA	29.34	50	6	2	11700000	3030000	11800000	12100000	2320000	2540000	30600000	6180000	234000000	213000000	168000000	163000000	5.04:1.30:5.09:5.22:1.00:1.09:13.19:2.66:64.00:64.00:64.00:64.00	9910000	12500000	194000000	0.79:1.00:15.52	9300	Bradyrhizobiaceae	Rhodopseudomonas	Cold shock DNA binding protein OS=Rhodopseudomonas palustris (strain ATCC BAA-98 / CGA009) OX=258594 GN=cspA1 PE=4 SV=1
555	3292	tr|A0A318TJG3|A0A318TJG3_9BRAD	52.7	63	9	9	38000000	46900000	33800000	25000000	40800000	32700000	29800000	32800000	233000000	231000000	190000000	185000000	0.93:1.15:0.83:0.61:1.00:0.80:0.73:0.81:5.71:5.66:4.67:4.55	36000000	34000000	210000000	1.06:1.00:6.17	17341	Bradyrhizobiaceae	Rhodopseudomonas	Glutathione-dependent peroxiredoxin OS=Rhodopseudomonas faecalis OX=99655 GN=BJ122_11534 PE=3 SV=1
1418	24076	tr|A0A318TNZ0|A0A318TNZ0_9BRAD	33.36	70	8	8	229000	256000	66800	0	290000	160000	17600	71600	230000000	194000000	184000000	199000000	0.79:0.88:0.23:0:1.00:0.55:0.06:0.25:64.00:64.00:64.00:64.00	254000	140000	202000000	1.81:1.00:64.00	12696	Bradyrhizobiaceae	Rhodopseudomonas	Heme-degrading monooxygenase HmoA OS=Rhodopseudomonas faecalis OX=99655 GN=BJ122_10696 PE=4 SV=1
140	7085	tr|A0A5M6I2T1|A0A5M6I2T1_9RHIZ	35.36	51	16	7	8630000	20000000	3500000	13000000	64300000	58100000	80300000	83000000	229000000	215000000	226000000	215000000	0.13:0.31:0.05:0.20:1.00:0.90:1.25:1.29:3.56:3.35:3.52:3.34	11800000	71400000	221000000	0.16:1.00:3.10	39621	Blastochloridaceae	Blastochloris	Re/Si-specific NAD(P)(+) transhydrogenase subunit alpha OS=Blastochloris sulfoviridis OX=50712 GN=F1193_06985 PE=3 SV=1
1960	23515	tr|A0A5M6I3X7|A0A5M6I3X7_9RHIZ	35.52	54	8	8	62700000	65300000	35600000	31600000	76300000	78600000	102000000	97300000	221000000	253000000	325000000	333000000	0.82:0.86:0.47:0.41:1.00:1.03:1.34:1.28:2.89:3.32:4.26:4.36	48800000	89300000	288000000	0.55:1.00:3.23	15210	Blastochloridaceae	Blastochloris	MucR family transcriptional regulator OS=Blastochloris sulfoviridis OX=50712 GN=F1193_03270 PE=3 SV=1
309	7493	tr|A0A318U0I7|A0A318U0I7_9BRAD	37.23	66	12	12	18400000	19300000	7000000	9600000	9030000	9570000	20900000	22100000	217000000	247000000	271000000	262000000	2.04:2.14:0.78:1.06:1.00:1.06:2.31:2.45:24.04:27.30:30.04:28.98	13600000	15600000	250000000	0.87:1.00:16.00	21764	Bradyrhizobiaceae	Rhodopseudomonas	Uncharacterized protein OS=Rhodopseudomonas faecalis OX=99655 GN=BJ122_101169 PE=4 SV=1
1304	5908	tr|A0A348G264|A0A348G264_9RHIZ	15.96	10	6	4	48600000	40700000	105000000	109000000	248000000	283000000	198000000	180000000	215000000	260000000	113000000	124000000	0.20:0.16:0.42:0.44:1.00:1.14:0.80:0.72:0.87:1.05:0.46:0.50	76000000	227000000	178000000	0.33:1.00:0.78	53618	Blastochloridaceae	Blastochloris	Porin OS=Blastochloris tepida OX=2233851 GN=BLTE_23320 PE=3 SV=1
35	20501	tr|A0A318TFY4|A0A318TFY4_9BRAD	36.06	51	28	23	43000000	56100000	77700000	72100000	35300000	32000000	53300000	56200000	212000000	238000000	194000000	195000000	1.22:1.59:2.20:2.04:1.00:0.91:1.51:1.59:6.01:6.75:5.49:5.52	62400000	44700000	210000000	1.40:1.00:4.69	82934	Bradyrhizobiaceae	Rhodopseudomonas	Hemoglobin/transferrin/lactoferrin receptor protein OS=Rhodopseudomonas faecalis OX=99655 GN=BJ122_10697 PE=3 SV=1
698	20923	tr|A0A318TL61|A0A318TL61_9BRAD	50.98	22	9	5	20400000	14800000	19800000	17300000	90300000	93700000	97100000	98700000	208000000	207000000	216000000	173000000	0.23:0.16:0.22:0.19:1.00:1.04:1.08:1.09:2.30:2.29:2.39:1.91	18100000	95000000	201000000	0.19:1.00:2.11	52042	Bradyrhizobiaceae	Rhodopseudomonas	Glutamate synthase (NADH) small subunit OS=Rhodopseudomonas faecalis OX=99655 GN=BJ122_103235 PE=4 SV=1
4844	27506	tr|A0A318T911|A0A318T911_9BRAD	60.64	27	3	3	42400000	46500000	43800000	36900000	14300000	16600000	13900000	14500000	202000000	195000000	265000000	272000000	2.96:3.24:3.05:2.57:1.00:1.16:0.97:1.01:14.10:13.56:18.45:18.98	42400000	14800000	234000000	2.85:1.00:15.73	16989	Bradyrhizobiaceae	Rhodopseudomonas	Uncharacterized protein OS=Rhodopseudomonas faecalis OX=99655 GN=BJ122_12816 PE=4 SV=1
379	7715	tr|A0A318TE82|A0A318TE82_9BRAD	53.6	41	16	7	15500000	17300000	8800000	9270000	9540000	8870000	12200000	10100000	200000000	197000000	200000000	198000000	1.63:1.82:0.92:0.97:1.00:0.93:1.28:1.06:20.98:20.61:20.97:20.76	13000000	10300000	199000000	1.26:1.00:19.20	47373	Bradyrhizobiaceae	Rhodopseudomonas	Dihydrolipoyllysine-residue succinyltransferase component of 2-oxoglutarate dehydrogenase complex OS=Rhodopseudomonas faecalis OX=99655 GN=BJ122_11422 PE=3 SV=1
26	1265	tr|A0A318TJ62|A0A318TJ62_9BRAD	39.32	47	32	13	23100000	20400000	9630000	8150000	11900000	9820000	13200000	11800000	199000000	166000000	169000000	98200000	1.93:1.71:0.81:0.68:1.00:0.82:1.11:0.99:16.67:13.91:14.19:8.24	17100000	12300000	158000000	1.39:1.00:12.79	72348	Bradyrhizobiaceae	Rhodopseudomonas	Acetyl-coenzyme A synthetase OS=Rhodopseudomonas faecalis OX=99655 GN=acsA PE=3 SV=1
4749	28735	tr|A0A5M6I4E6|A0A5M6I4E6_9RHIZ	38.99	45	3	3	25300000	19600000	34800000	37800000	101000000	118000000	64600000	71200000	199000000	201000000	286000000	307000000	0.25:0.19:0.34:0.37:1.00:1.17:0.64:0.71:1.97:1.99:2.83:3.04	29400000	89100000	250000000	0.33:1.00:2.81	7800	Blastochloridaceae	Blastochloris	Light-harvesting protein OS=Blastochloris sulfoviridis OX=50712 GN=F1193_02090 PE=4 SV=1
4231	62095	tr|A0A2T4JF53|A0A2T4JF53_RHOBL	28.81	9	3	3	53600000	48800000	119000000	107000000	27200000	26300000	39600000	49700000	198000000	247000000	136000000	134000000	1.97:1.79:4.38:3.91:1.00:0.97:1.45:1.82:7.26:9.07:4.97:4.92	88700000	36500000	183000000	2.43:1.00:5.02	32528	Rhodobacteraceae	Rhodobacter	Porin_4 domain-containing protein OS=Rhodobacter blasticus DSM 2131 OX=1188250 GN=C5F44_01425 PE=4 SV=1
629	21065	tr|A0A318TIA3|A0A318TIA3_9BRAD	67.1	22	10	10	2630000000	2680000000	2260000000	2190000000	1250000000	1320000000	1530000000	1820000000	193000000	232000000	197000000	191000000	2.11:2.15:1.81:1.76:1.00:1.06:1.23:1.46:0.15:0.19:0.16:0.15	2440000000	1480000000	207000000	1.65:1.00:0.14	76991	Bradyrhizobiaceae	Rhodopseudomonas	Cytochrome b OS=Rhodopseudomonas faecalis OX=99655 GN=BJ122_10357 PE=3 SV=1
4152	8078	tr|A0A318TA80|A0A318TA80_9BRAD	57.98	38	4	4	24700000	25200000	23800000	22700000	6670000	6570000	10600000	19400000	192000000	210000000	175000000	171000000	3.70:3.77:3.57:3.41:1.00:0.99:1.59:2.92:28.78:31.53:26.21:25.62	26300000	10800000	187000000	2.43:1.00:17.24	11183	Bradyrhizobiaceae	Rhodopseudomonas	50S ribosomal protein L24 OS=Rhodopseudomonas faecalis OX=99655 GN=rplX PE=3 SV=1
103	645	tr|A0A318TLN8|A0A318TLN8_9BRAD	49.42	59	20	12	9790000	12500000	16200000	14800000	10300000	10900000	3890000	4920000	190000000	218000000	188000000	168000000	0.95:1.21:1.57:1.43:1.00:1.06:0.38:0.48:18.39:21.12:18.26:16.26	15700000	7630000	191000000	2.06:1.00:24.99	37121	Bradyrhizobiaceae	Rhodopseudomonas	Amino acid ABC transporter substrate-binding protein (PAAT family) OS=Rhodopseudomonas faecalis OX=99655 GN=BJ122_101318 PE=3 SV=1
141	1260	tr|A0A5M6I4H7|A0A5M6I4H7_9RHIZ	55.28	31	15	9	17800000	16800000	13200000	12900000	52500000	45600000	60900000	59400000	186000000	160000000	140000000	140000000	0.34:0.32:0.25:0.24:1.00:0.87:1.16:1.13:3.54:3.05:2.67:2.66	15200000	54600000	157000000	0.28:1.00:2.87	38986	Blastochloridaceae	Blastochloris	Branched-chain amino acid ABC transporter substrate-binding protein OS=Blastochloris sulfoviridis OX=50712 GN=F1193_04325 PE=3 SV=1
724	21834	tr|A0A318TAD2|A0A318TAD2_9BRAD	45.94	42	10	10	4200000	4470000	2600000	1650000	623000	630000	1400000	1280000	186000000	174000000	171000000	174000000	6.74:7.17:4.18:2.64:1.00:1.01:2.24:2.06:64.00:64.00:64.00:64.00	3640000	1360000	177000000	2.68:1.00:64.00	24429	Bradyrhizobiaceae	Rhodopseudomonas	Uncharacterized protein OS=Rhodopseudomonas faecalis OX=99655 GN=BJ122_1602 PE=4 SV=1
4907	55192	tr|A0A510IMA0|A0A510IMA0_RHOSP	66.46	13	2	2	7550000	6100000	5590000	5970000	9090000	8140000	7170000	6330000	184000000	191000000	195000000	205000000	0.83:0.67:0.61:0.66:1.00:0.89:0.79:0.70:20.23:21.02:21.41:22.51	6450000	7800000	194000000	0.83:1.00:24.92	14260	Bradyrhizobiaceae	Rhodopseudomonas	Photosynthetic reaction center L subunit (Fragment) OS=Rhodopseudomonas sp. OX=1078 GN=pufL PE=3 SV=1
458	23106	tr|A0A318TK42|A0A318TK42_9BRAD	55.96	74	11	7	6940000	6760000	4340000	8440000	5230000	4480000	7510000	7890000	183000000	207000000	150000000	171000000	1.33:1.29:0.83:1.61:1.00:0.86:1.44:1.51:35.07:39.53:28.73:32.73	6760000	6360000	188000000	1.06:1.00:29.52	20482	Bradyrhizobiaceae	Rhodopseudomonas	Alkyl hydroperoxide reductase C OS=Rhodopseudomonas faecalis OX=99655 GN=BJ122_104157 PE=3 SV=1
27	20527	tr|A0A318TR99|A0A318TR99_9BRAD	48.85	58	22	8	1420000	921000	1420000	1830000	1630000	1680000	1720000	1730000	180000000	138000000	110000000	103000000	0.87:0.56:0.87:1.12:1.00:1.03:1.05:1.06:64.00:64.00:64.00:63.15	1660000	1840000	156000000	0.90:1.00:64.00	47546	Bradyrhizobiaceae	Rhodopseudomonas	Beta-alanine--pyruvate transaminase OS=Rhodopseudomonas faecalis OX=99655 GN=BJ122_10388 PE=3 SV=1
132	533	tr|A0A318TGQ5|A0A318TGQ5_9BRAD	54.04	40	23	16	19800000	15400000	16400000	13200000	16200000	14900000	16900000	15500000	174000000	200000000	170000000	141000000	1.22:0.95:1.01:0.81:1.00:0.92:1.04:0.96:10.74:12.36:10.53:8.74	16900000	16100000	171000000	1.05:1.00:10.63	73150	Bradyrhizobiaceae	Rhodopseudomonas	Elongation factor G OS=Rhodopseudomonas faecalis OX=99655 GN=BJ122_13125 PE=3 SV=1
568	20797	tr|A0A318TUF3|A0A318TUF3_9BRAD	52.54	27	13	12	10400000	12500000	9600000	8560000	6690000	6480000	7040000	6240000	173000000	192000000	281000000	224000000	1.55:1.87:1.43:1.28:1.00:0.97:1.05:0.93:25.91:28.63:41.98:33.52	10500000	6660000	219000000	1.58:1.00:32.84	65429	Bradyrhizobiaceae	Rhodopseudomonas	Parvulin-like PPIase OS=Rhodopseudomonas faecalis OX=99655 GN=BJ122_101248 PE=3 SV=1
1022	21928	tr|A0A318TQG9|A0A318TQG9_9BRAD	25.79	35	10	10	17600000	16200000	14100000	12500000	9140000	5130000	11800000	11500000	171000000	82900000	63000000	60500000	1.92:1.77:1.55:1.36:1.00:0.56:1.29:1.26:18.69:9.08:6.89:6.63	15800000	10000000	94300000	1.57:1.00:9.39	47757	Bradyrhizobiaceae	Rhodopseudomonas	Uncharacterized protein OS=Rhodopseudomonas faecalis OX=99655 GN=BJ122_11621 PE=4 SV=1
1026	23021	tr|A0A318TJN9|A0A318TJN9_9BRAD	65.26	30	6	3	51100000	61900000	68600000	60500000	21800000	22300000	23900000	24300000	167000000	158000000	191000000	184000000	2.34:2.84:3.14:2.77:1.00:1.02:1.10:1.11:7.67:7.23:8.77:8.41	60500000	25300000	175000000	2.39:1.00:6.92	25195	Bradyrhizobiaceae	Rhodopseudomonas	Phosphatidylserine decarboxylase proenzyme OS=Rhodopseudomonas faecalis OX=99655 GN=psd PE=3 SV=1
546	21534	tr|A0A318TSQ1|A0A318TSQ1_9BRAD	45.82	53	13	13	22400000	20900000	9360000	10100000	8220000	6380000	10500000	6880000	166000000	170000000	172000000	167000000	2.72:2.54:1.14:1.23:1.00:0.78:1.27:0.84:20.18:20.73:20.87:20.32	15800000	8030000	169000000	1.97:1.00:21.01	27374	Bradyrhizobiaceae	Rhodopseudomonas	Enoyl-CoA hydratase OS=Rhodopseudomonas faecalis OX=99655 GN=BJ122_11015 PE=4 SV=1
3330	52720	tr|A0A318TEL6|A0A318TEL6_9BRAD	43.87	34	4	4	30500000	26600000	16700000	17500000	10300000	10000000	15700000	16900000	163000000	190000000	179000000	169000000	2.96:2.59:1.62:1.70:1.00:0.98:1.53:1.65:15.80:18.45:17.36:16.45	22800000	13200000	175000000	1.72:1.00:13.22	15272	Bradyrhizobiaceae	Rhodopseudomonas	Nucleoside diphosphate kinase OS=Rhodopseudomonas faecalis OX=99655 GN=ndk PE=3 SV=1
5533	35195	tr|A0A5M6I2Q8|A0A5M6I2Q8_9RHIZ	67.72	10	2	2	157000	293000	367000	1130000	2230000	2720000	2340000	2750000	163000000	165000000	154000000	154000000	0.07:0.13:0.16:0.51:1.00:1.22:1.05:1.23:64.00:64.00:64.00:64.00	487000	2510000	159000000	0.19:1.00:63.35	28114	Blastochloridaceae	Blastochloris	DUF4198 domain-containing protein OS=Blastochloris sulfoviridis OX=50712 GN=F1193_07335 PE=4 SV=1
563	927	tr|Q137Y7|Q137Y7_RHOPS	35.9	23	9	2	29400000	25700000	13500000	17000000	37200000	44500000	18800000	22300000	162000000	165000000	203000000	184000000	0.79:0.69:0.36:0.46:1.00:1.20:0.51:0.60:4.35:4.45:5.47:4.96	21500000	33600000	179000000	0.64:1.00:5.33	72741	Bradyrhizobiaceae	Rhodopseudomonas	Flagellin OS=Rhodopseudomonas palustris (strain BisB5) OX=316057 GN=RPD_2370 PE=3 SV=1
2458	4373	tr|A0A318TNI3|A0A318TNI3_9BRAD	28.35	59	7	7	42700000	43800000	16900000	22200000	42700000	44200000	19300000	20600000	159000000	162000000	166000000	128000000	1.00:1.03:0.40:0.52:1.00:1.04:0.45:0.48:3.73:3.79:3.88:3.01	31400000	31700000	154000000	0.99:1.00:4.85	11151	Bradyrhizobiaceae	Rhodopseudomonas	DNA-binding protein HU-beta OS=Rhodopseudomonas faecalis OX=99655 GN=BJ122_101182 PE=3 SV=1
1183	22685	tr|A0A318TGI6|A0A318TGI6_9BRAD	61.22	29	8	7	17800000	17700000	13400000	33400000	11700000	10800000	9120000	9240000	156000000	161000000	137000000	126000000	1.53:1.52:1.15:2.87:1.00:0.92:0.78:0.79:13.36:13.82:11.75:10.80	20700000	10400000	145000000	2.00:1.00:13.98	36968	Bradyrhizobiaceae	Rhodopseudomonas	Fructose-1 6-bisphosphatase class 1 OS=Rhodopseudomonas faecalis OX=99655 GN=fbp PE=3 SV=1
2018	6752	tr|A0A318TIU6|A0A318TIU6_9BRAD	55.17	49	7	7	19000000	18500000	16600000	14100000	9180000	10500000	8310000	10900000	156000000	194000000	145000000	117000000	2.07:2.01:1.81:1.53:1.00:1.14:0.91:1.19:16.99:21.17:15.77:12.74	17700000	9710000	153000000	1.82:1.00:15.76	18927	Bradyrhizobiaceae	Rhodopseudomonas	Uncharacterized protein OS=Rhodopseudomonas faecalis OX=99655 GN=BJ122_10517 PE=4 SV=1
467	21208	tr|A0A5M6HKB7|A0A5M6HKB7_9RHIZ	47.66	21	11	5	43300000	30400000	37800000	29800000	41100000	46700000	43200000	48100000	155000000	160000000	129000000	131000000	1.05:0.74:0.92:0.73:1.00:1.14:1.05:1.17:3.78:3.88:3.13:3.20	36000000	49000000	146000000	0.73:1.00:2.98	92125	Blastochloridaceae	Blastochloris	Arylsulfatase OS=Blastochloris sulfoviridis OX=50712 GN=F1193_15715 PE=3 SV=1
979	21086	tr|A0A318TH44|A0A318TH44_9BRAD	56.68	35	10	10	14800000	17200000	13900000	12900000	15700000	14500000	39200000	33900000	152000000	152000000	132000000	143000000	0.95:1.10:0.89:0.82:1.00:0.92:2.51:2.16:9.69:9.68:8.42:9.16	16200000	26000000	146000000	0.62:1.00:5.61	39154	Bradyrhizobiaceae	Rhodopseudomonas	Uncharacterized protein OS=Rhodopseudomonas faecalis OX=99655 GN=BJ122_11269 PE=4 SV=1
4190	28949	tr|A0A5M6I3Y8|A0A5M6I3Y8_9RHIZ	58.93	23	3	3	19600000	20000000	15000000	16000000	58800000	57900000	64900000	67200000	151000000	141000000	155000000	154000000	0.33:0.34:0.25:0.27:1.00:0.98:1.10:1.14:2.56:2.40:2.64:2.61	17700000	62300000	150000000	0.28:1.00:2.41	16586	Blastochloridaceae	Blastochloris	DUF992 domain-containing protein OS=Blastochloris sulfoviridis OX=50712 GN=F1193_05245 PE=4 SV=1
391	21379	tr|A0A5M6HVG1|A0A5M6HVG1_9RHIZ	30.03	42	12	12	41000000	43000000	20100000	17000000	77500000	73400000	96900000	99700000	150000000	167000000	164000000	141000000	0.53:0.55:0.26:0.22:1.00:0.95:1.25:1.29:1.93:2.15:2.11:1.82	30300000	86900000	155000000	0.35:1.00:1.79	40174	Blastochloridaceae	Blastochloris	ABC transporter substrate-binding protein OS=Blastochloris sulfoviridis OX=50712 GN=F1193_11530 PE=3 SV=1
219	567	tr|A0A348FZU5|A0A348FZU5_9RHIZ	53.38	31	14	14	67300000	71400000	42500000	35600000	13100000	16900000	17700000	14200000	148000000	158000000	153000000	133000000	5.14:5.45:3.25:2.72:1.00:1.29:1.35:1.09:11.34:12.09:11.67:10.17	54200000	15500000	148000000	3.50:1.00:9.56	60546	Blastochloridaceae	Blastochloris	Arylsulfatase OS=Blastochloris tepida OX=2233851 GN=BLTE_15130 PE=4 SV=1
2460	8439	tr|A0A318TYS3|A0A318TYS3_9BRAD	45.64	65	5	5	29800000	26700000	16300000	12600000	5570000	5610000	8090000	8510000	145000000	140000000	143000000	152000000	5.34:4.79:2.92:2.26:1.00:1.01:1.45:1.53:26.02:25.12:25.68:27.23	21600000	6950000	145000000	3.11:1.00:20.86	13469	Bradyrhizobiaceae	Rhodopseudomonas	Cupin_2 domain-containing protein OS=Rhodopseudomonas faecalis OX=99655 GN=BJ122_1024 PE=4 SV=1
265	4051	tr|A0A0H5B8Y7|A0A0H5B8Y7_BLAVI	28.44	39	12	9	68500000	59000000	31400000	48000000	115000000	112000000	102000000	99200000	144000000	141000000	137000000	146000000	0.59:0.51:0.27:0.42:1.00:0.97:0.88:0.86:1.25:1.22:1.19:1.26	51700000	112000000	142000000	0.46:1.00:1.26	35765	Blastochloridaceae	Blastochloris	Glyceraldehyde-3-phosphate dehydrogenase OS=Blastochloris viridis OX=1079 GN=gap PE=3 SV=1
5563	39751	P35108|LHB3_RHOPA	54.51	43	2	2	7140000	9080000	5370000	5830000	4950000	6030000	10500000	7530000	142000000	158000000	138000000	115000000	1.44:1.84:1.09:1.18:1.00:1.22:2.12:1.52:28.63:31.95:27.91:23.18	6970000	7250000	138000000	0.96:1.00:19.04	5776	Bradyrhizobiaceae	Rhodopseudomonas	Light-harvesting protein B-800-850 beta chain C OS=Rhodopseudomonas palustris (strain ATCC BAA-98 / CGA009) OX=258594 GN=pucBC PE=3 SV=1
223	50408	tr|A0A5A7WJS5|A0A5A7WJS5_9BRAD	64.41	31	19	2	18800000	19000000	14600000	13500000	11800000	12000000	11600000	10900000	141000000	118000000	124000000	116000000	1.60:1.61:1.24:1.14:1.00:1.02:0.98:0.92:12.00:10.01:10.54:9.89	16500000	11600000	125000000	1.43:1.00:10.79	55100	Bradyrhizobiaceae	Tardiphaga	ATP synthase subunit alpha OS=Tardiphaga sp. P9-11 OX=2024614 GN=atpA PE=3 SV=1
20	20500	tr|A0A318TAB1|A0A318TAB1_9BRAD	44.52	53	29	14	6260000	5790000	5020000	6090000	5550000	5960000	2490000	2840000	140000000	184000000	144000000	92900000	1.13:1.04:0.91:1.10:1.00:1.07:0.45:0.51:25.21:33.14:25.92:16.73	6100000	4210000	140000000	1.45:1.00:33.30	77462	Bradyrhizobiaceae	Rhodopseudomonas	Malate synthase G OS=Rhodopseudomonas faecalis OX=99655 GN=glcB PE=3 SV=1
1309	22264	tr|A0A318TIL8|A0A318TIL8_9BRAD	57.67	40	9	9	7810000	6460000	5290000	6170000	3270000	2440000	4810000	7260000	139000000	159000000	147000000	133000000	2.39:1.98:1.62:1.89:1.00:0.75:1.47:2.22:42.36:48.62:45.08:40.81	7640000	5350000	160000000	1.43:1.00:29.82	27485	Bradyrhizobiaceae	Rhodopseudomonas	Molybdate transport system substrate-binding protein OS=Rhodopseudomonas faecalis OX=99655 GN=BJ122_103189 PE=3 SV=1
372	2826	tr|A0A318TIY1|A0A318TIY1_9BRAD	66.85	44	12	11	29000000	25700000	16600000	20100000	14000000	15500000	15900000	16300000	137000000	126000000	133000000	130000000	2.08:1.84:1.19:1.44:1.00:1.11:1.14:1.17:9.83:9.05:9.55:9.34	22900000	15400000	132000000	1.48:1.00:8.55	41763	Bradyrhizobiaceae	Rhodopseudomonas	Amino acid/amide ABC transporter substrate-binding protein (HAAT family) OS=Rhodopseudomonas faecalis OX=99655 GN=BJ122_10326 PE=3 SV=1
1079	5425	tr|A0A318TCF6|A0A318TCF6_9BRAD	45.64	16	7	2	74400000	57200000	26000000	25100000	25600000	24900000	33600000	31300000	137000000	161000000	150000000	127000000	2.91:2.24:1.02:0.98:1.00:0.97:1.31:1.22:5.37:6.28:5.86:4.96	45700000	28800000	144000000	1.58:1.00:4.98	59845	Bradyrhizobiaceae	Rhodopseudomonas	Flagellin-like protein (Fragment) OS=Rhodopseudomonas faecalis OX=99655 GN=BJ122_1301 PE=4 SV=1
2387	9169	tr|A0A318TC39|A0A318TC39_9BRAD	61.21	33	7	7	17900000	17700000	16900000	15000000	5070000	7810000	9180000	9490000	136000000	152000000	165000000	176000000	3.53:3.49:3.34:2.96:1.00:1.54:1.81:1.87:26.85:29.95:32.53:34.69	17000000	8440000	164000000	2.01:1.00:19.46	33731	Bradyrhizobiaceae	Rhodopseudomonas	Tripartite-type tricarboxylate transporter receptor subunit TctC OS=Rhodopseudomonas faecalis OX=99655 GN=BJ122_111102 PE=3 SV=1
57	4012	tr|A0A0H5BCR9|A0A0H5BCR9_BLAVI	35.64	18	25	7	15400000	14800000	2430000	3780000	63700000	62700000	68600000	60400000	135000000	137000000	144000000	112000000	0.24:0.23:0.04:0.06:1.00:0.98:1.08:0.95:2.13:2.15:2.27:1.76	9120000	63800000	132000000	0.14:1.00:2.07	179252	Blastochloridaceae	Blastochloris	Pyruvate synthase subunit porB OS=Blastochloris viridis OX=1079 GN=porB PE=3 SV=1
119	4118	tr|A0A5M6I4M2|A0A5M6I4M2_9RHIZ	32.22	42	20	14	12800000	11100000	2920000	7140000	23600000	21700000	29900000	29000000	134000000	119000000	88000000	75300000	0.54:0.47:0.12:0.30:1.00:0.92:1.27:1.23:5.68:5.05:3.73:3.19	8510000	26600000	104000000	0.32:1.00:3.92	69042	Blastochloridaceae	Blastochloris	Phosphoenolpyruvate carboxykinase [GTP] OS=Blastochloris sulfoviridis OX=50712 GN=pckG PE=3 SV=1
4050	5368	tr|A0A5M6I1W4|A0A5M6I1W4_9RHIZ	54.08	38	3	3	19300000	17200000	19200000	18700000	39500000	36300000	72400000	69200000	134000000	136000000	124000000	107000000	0.49:0.43:0.49:0.47:1.00:0.92:1.83:1.75:3.40:3.43:3.14:2.70	18600000	54400000	125000000	0.34:1.00:2.30	7236	Blastochloridaceae	Blastochloris	DUF2158 domain-containing protein OS=Blastochloris sulfoviridis OX=50712 GN=F1193_06095 PE=4 SV=1
56	2133	tr|A0A318TI86|A0A318TI86_9BRAD	44.77	39	24	22	21000000	21100000	11200000	11200000	14100000	14100000	12800000	11900000	130000000	124000000	97000000	87000000	1.49:1.50:0.80:0.79:1.00:1.00:0.91:0.84:9.22:8.79:6.88:6.18	16500000	13700000	110000000	1.20:1.00:8.00	79952	Bradyrhizobiaceae	Rhodopseudomonas	Short chain enoyl-CoA hydratase /3-hydroxyacyl-CoA dehydrogenase OS=Rhodopseudomonas faecalis OX=99655 GN=BJ122_103227 PE=3 SV=1
688	312	tr|A0A318T8Z8|A0A318T8Z8_9BRAD	19.34	33	12	5	112000000	122000000	69300000	65900000	5150000	16000000	30400000	7390000	126000000	99500000	115000000	109000000	21.68:23.59:13.45:12.80:1.00:3.11:5.91:1.44:24.42:19.31:22.32:21.09	92100000	23300000	112000000	3.96:1.00:4.82	42953	Bradyrhizobiaceae	Rhodopseudomonas	Amino acid/amide ABC transporter substrate-binding protein (HAAT family) OS=Rhodopseudomonas faecalis OX=99655 GN=BJ122_12633 PE=4 SV=1
2255	4890	tr|A0A5M6I316|A0A5M6I316_9RHIZ	42.38	44	6	6	11500000	12000000	7180000	6810000	16200000	34400000	42100000	57200000	125000000	101000000	134000000	166000000	0.71:0.74:0.44:0.42:1.00:2.13:2.60:3.53:7.74:6.25:8.31:10.24	12800000	42900000	133000000	0.30:1.00:3.10	17783	Blastochloridaceae	Blastochloris	DUF1269 domain-containing protein OS=Blastochloris sulfoviridis OX=50712 GN=F1193_05340 PE=4 SV=1
1640	2233	tr|A0A0H5BNL2|A0A0H5BNL2_BLAVI	19.65	41	5	4	515000000	470000000	230000000	256000000	191000000	195000000	406000000	393000000	124000000	123000000	131000000	118000000	2.70:2.46:1.21:1.34:1.00:1.02:2.13:2.06:0.65:0.64:0.68:0.62	377000000	296000000	129000000	1.27:1.00:0.44	15584	Blastochloridaceae	Blastochloris	Methyl-accepting chemotaxis protein 4 OS=Blastochloris viridis OX=1079 GN=mcp4_6 PE=4 SV=1
3531	64588	tr|A0A4Y6RZJ7|A0A4Y6RZJ7_9RHOB	19.73	22	3	2	21100000	20900000	1780000	10300000	1250000	729000	12600000	9630000	122000000	109000000	80000000	99800000	16.83:16.65:1.42:8.25:1.00:0.58:10.08:7.68:64.00:64.00:63.86:64.00	16900000	10800000	103000000	1.57:1.00:9.51	17133	Stappiaceae	Labrenzia	Peptidyl-prolyl cis-trans isomerase OS=Labrenzia sp. PHM005 OX=2590016 GN=FJ695_18365 PE=3 SV=1
388	11390	tr|E6VCA6|E6VCA6_RHOPX	73.88	27	12	2	12100000	13200000	15800000	15400000	15300000	16400000	17700000	16800000	120000000	121000000	113000000	111000000	0.79:0.86:1.03:1.00:1.00:1.07:1.16:1.10:7.82:7.91:7.34:7.26	14100000	16600000	116000000	0.85:1.00:7.02	60615	Bradyrhizobiaceae	Rhodopseudomonas	Isocitrase OS=Rhodopseudomonas palustris (strain DX-1) OX=652103 GN=Rpdx1_4610 PE=4 SV=1
545	11001	tr|A0A318TLB3|A0A318TLB3_9BRAD	59.67	30	12	12	17700000	20800000	26800000	25500000	9130000	7830000	11400000	9560000	120000000	138000000	115000000	138000000	1.94:2.28:2.93:2.79:1.00:0.86:1.25:1.05:13.10:15.16:12.65:15.11	22700000	10000000	128000000	2.27:1.00:12.79	52853	Bradyrhizobiaceae	Rhodopseudomonas	Trigger factor OS=Rhodopseudomonas faecalis OX=99655 GN=tig PE=3 SV=1
392	2187	tr|A0A5M6I4F3|A0A5M6I4F3_9RHIZ	68.16	57	16	13	19600000	22300000	19600000	20700000	57000000	53500000	56700000	51800000	119000000	121000000	137000000	136000000	0.34:0.39:0.34:0.36:1.00:0.94:0.99:0.91:2.09:2.12:2.40:2.39	21100000	55600000	128000000	0.38:1.00:2.31	38881	Blastochloridaceae	Blastochloris	Fructose-1 6-bisphosphate aldolase OS=Blastochloris sulfoviridis OX=50712 GN=F1193_02200 PE=3 SV=1
2905	23511	tr|A0A5M6I2B7|A0A5M6I2B7_9RHIZ	37.36	18	5	5	36300000	32900000	33700000	20100000	30300000	27000000	16900000	15700000	119000000	134000000	138000000	149000000	1.20:1.09:1.11:0.66:1.00:0.89:0.56:0.52:3.93:4.42:4.57:4.92	30700000	25600000	135000000	1.20:1.00:5.29	30249	Blastochloridaceae	Blastochloris	Molybdate ABC transporter substrate-binding protein OS=Blastochloris sulfoviridis OX=50712 GN=modA PE=3 SV=1
692	20877	tr|A0A318T6Y8|A0A318T6Y8_9BRAD	47.6	47	14	9	9120000	7970000	3590000	4790000	4120000	4030000	6020000	6160000	116000000	112000000	101000000	109000000	2.21:1.94:0.87:1.16:1.00:0.98:1.46:1.50:28.04:27.10:24.55:26.58	6830000	5080000	109000000	1.34:1.00:21.53	35959	Bradyrhizobiaceae	Rhodopseudomonas	Phosphate-binding protein PstS OS=Rhodopseudomonas faecalis OX=99655 GN=BJ122_13814 PE=3 SV=1
2771	1836	tr|A0A4R3MTM1|A0A4R3MTM1_9GAMM	61.52	14	5	5	39400000	34800000	30400000	31700000	21600000	18300000	20600000	21900000	116000000	149000000	127000000	127000000	1.82:1.61:1.41:1.47:1.00:0.85:0.96:1.02:5.39:6.89:5.90:5.90	34100000	21300000	130000000	1.60:1.00:6.09	45362	Chromatiaceae	Thiobaca	Pyruvate ferredoxin oxidoreductase alpha subunit OS=Thiobaca trueperi OX=127458 GN=EDC35_11324 PE=4 SV=1
556	20957	tr|A0A318TCP3|A0A318TCP3_9BRAD	57.24	46	15	15	17400000	15800000	11600000	11600000	12700000	12000000	14900000	16200000	114000000	124000000	99200000	97300000	1.38:1.25:0.92:0.92:1.00:0.95:1.18:1.28:8.98:9.83:7.83:7.68	14300000	14200000	111000000	1.01:1.00:7.82	40024	Bradyrhizobiaceae	Rhodopseudomonas	Branched-chain-amino-acid aminotransferase OS=Rhodopseudomonas faecalis OX=99655 GN=BJ122_12073 PE=3 SV=1
844	50673	tr|A0A2T4J4Z7|A0A2T4J4Z7_RHOBL	73.37	57	11	10	24000000	22400000	18200000	15800000	4690000	4530000	5280000	4250000	114000000	111000000	126000000	112000000	5.10:4.77:3.88:3.36:1.00:0.96:1.13:0.90:24.19:23.59:26.93:23.82	20100000	4910000	116000000	4.09:1.00:23.58	28287	Rhodobacteraceae	Rhodobacter	Photosynthetic reaction center subunit H OS=Rhodobacter blasticus DSM 2131 OX=1188250 GN=puhA PE=4 SV=1
2383	6047	tr|A0A318TGT3|A0A318TGT3_9BRAD	57.11	44	6	6	12600000	12100000	8420000	9880000	6960000	7000000	8820000	8740000	113000000	116000000	89100000	82000000	1.82:1.73:1.21:1.42:1.00:1.01:1.27:1.25:16.22:16.72:12.80:11.78	10800000	7890000	100000000	1.37:1.00:12.68	27547	Bradyrhizobiaceae	Rhodopseudomonas	Cytochrome c oxidase cbb3-type subunit 2 OS=Rhodopseudomonas faecalis OX=99655 GN=BJ122_12922 PE=4 SV=1
2466	25106	tr|A0A318TFD4|A0A318TFD4_9BRAD	53.75	74	6	6	10000000	9010000	3530000	5230000	2780000	1720000	2300000	2250000	113000000	101000000	106000000	101000000	3.61:3.24:1.27:1.88:1.00:0.62:0.83:0.81:40.68:36.47:38.28:36.31	7330000	2260000	105000000	3.24:1.00:46.58	17618	Bradyrhizobiaceae	Rhodopseudomonas	PBP family phospholipid-binding protein OS=Rhodopseudomonas faecalis OX=99655 GN=BJ122_11630 PE=4 SV=1
169	50311	tr|A0A2T0NH87|A0A2T0NH87_RHITR	65.18	36	21	2	10800000	10100000	10200000	8940000	11200000	10700000	9110000	8350000	111000000	114000000	100000000	88900000	0.97:0.90:0.92:0.80:1.00:0.96:0.82:0.75:9.95:10.24:8.95:7.96	10000000	9820000	104000000	1.02:1.00:10.55	55116	Rhizobiaceae	Rhizobium	ATP synthase subunit alpha OS=Rhizobium tropici OX=398 GN=atpA PE=3 SV=1
2027	24082	tr|A0A318TDL6|A0A318TDL6_9BRAD	50.96	62	7	7	9800000	10100000	5350000	4190000	2390000	2670000	3680000	3690000	111000000	115000000	113000000	99800000	4.10:4.24:2.24:1.75:1.00:1.12:1.54:1.54:46.67:47.96:47.20:41.80	7940000	3110000	110000000	2.55:1.00:35.28	13174	Bradyrhizobiaceae	Rhodopseudomonas	Rhodanese-related sulfurtransferase OS=Rhodopseudomonas faecalis OX=99655 GN=BJ122_11063 PE=4 SV=1
876	23798	tr|A0A318T8Y0|A0A318T8Y0_9BRAD	59.38	29	6	6	18200000	14800000	18000000	18000000	10300000	7620000	9960000	8530000	110000000	109000000	82500000	98800000	1.77:1.43:1.75:1.75:1.00:0.74:0.97:0.83:10.66:10.57:8.00:9.57	18200000	9500000	100000000	1.92:1.00:10.54	31904	Bradyrhizobiaceae	Rhodopseudomonas	Cbb3-type cytochrome c oxidase subunit OS=Rhodopseudomonas faecalis OX=99655 GN=BJ122_12920 PE=3 SV=1
1155	21580	tr|A0A348G563|A0A348G563_9RHIZ	31.66	14	10	10	30400000	34000000	50700000	46100000	26200000	45900000	44200000	46400000	108000000	120000000	127000000	119000000	1.16:1.30:1.94:1.76:1.00:1.76:1.69:1.77:4.11:4.59:4.87:4.54	40800000	41100000	118000000	0.99:1.00:2.88	82669	Blastochloridaceae	Blastochloris	HEM4 domain-containing protein OS=Blastochloris tepida OX=2233851 GN=BLTE_33810 PE=4 SV=1
266	20686	tr|A0A318T9N4|A0A318T9N4_9BRAD	42.28	54	17	14	52400000	52900000	43000000	41400000	39800000	38700000	49800000	45800000	106000000	112000000	106000000	100000000	1.31:1.33:1.08:1.04:1.00:0.97:1.25:1.15:2.66:2.80:2.65:2.52	47400000	43600000	106000000	1.09:1.00:2.43	33859	Bradyrhizobiaceae	Rhodopseudomonas	Protein HflC OS=Rhodopseudomonas faecalis OX=99655 GN=BJ122_1239 PE=3 SV=1
4151	7636	tr|A0A318T916|A0A318T916_9BRAD	38.6	55	3	3	53600000	57600000	25800000	31700000	18400000	18400000	14900000	11700000	106000000	125000000	81600000	77300000	2.90:3.13:1.40:1.72:1.00:1.00:0.81:0.63:5.72:6.76:4.42:4.19	42200000	17100000	97300000	2.47:1.00:5.69	10061	Bradyrhizobiaceae	Rhodopseudomonas	Uncharacterized protein OS=Rhodopseudomonas faecalis OX=99655 GN=BJ122_12739 PE=4 SV=1
539	21924	tr|Q6NB84|Q6NB84_RHOPA	70.78	30	11	2	8920000	7970000	8630000	7290000	6180000	6510000	5090000	6070000	104000000	110000000	138000000	119000000	1.44:1.29:1.40:1.18:1.00:1.05:0.82:0.98:16.86:17.77:22.28:19.20	8200000	5960000	118000000	1.38:1.00:19.73	35956	Bradyrhizobiaceae	Rhodopseudomonas	Glyceraldehyde-3-phosphate dehydrogenase(GAPDH) OS=Rhodopseudomonas palustris (strain ATCC BAA-98 / CGA009) OX=258594 GN=cbbG PE=3 SV=1
1206	27412	tr|A0A318TE09|A0A318TE09_9BRAD	39.07	48	6	6	29100000	31500000	18600000	16800000	11100000	11200000	18200000	16100000	104000000	91700000	105000000	101000000	2.62:2.83:1.67:1.51:1.00:1.01:1.64:1.44:9.38:8.25:9.43:9.04	24000000	14200000	100000000	1.69:1.00:7.10	10914	Bradyrhizobiaceae	Rhodopseudomonas	Nucleoid DNA-binding protein OS=Rhodopseudomonas faecalis OX=99655 GN=BJ122_10836 PE=3 SV=1
1369	22688	tr|A0A318TAJ1|A0A318TAJ1_9BRAD	53.05	35	8	5	7210000	6770000	11700000	9170000	8000000	7760000	6990000	5670000	103000000	94100000	96100000	94400000	0.90:0.85:1.46:1.15:1.00:0.97:0.87:0.71:12.82:11.76:12.01:11.80	9850000	7620000	96800000	1.29:1.00:12.70	21083	Bradyrhizobiaceae	Rhodopseudomonas	50S ribosomal protein L5 OS=Rhodopseudomonas faecalis OX=99655 GN=rplE PE=3 SV=1
1415	21626	tr|A0A318TDD9|A0A318TDD9_9BRAD	51.35	29	8	8	7350000	6490000	5600000	4200000	9180000	4720000	5770000	4390000	103000000	129000000	115000000	109000000	0.80:0.71:0.61:0.46:1.00:0.51:0.63:0.48:11.22:14.03:12.54:11.82	6320000	6010000	114000000	1.05:1.00:18.94	38284	Bradyrhizobiaceae	Rhodopseudomonas	Uroporphyrinogen decarboxylase OS=Rhodopseudomonas faecalis OX=99655 GN=hemE PE=3 SV=1
4893	37961	tr|A0A318TC49|A0A318TC49_9BRAD	34.11	25	3	3	15800000	9880000	5640000	6480000	2050000	3080000	9340000	8290000	103000000	132000000	112000000	94600000	7.74:4.83:2.76:3.17:1.00:1.50:4.57:4.06:50.32:64.00:54.59:46.24	11900000	6650000	116000000	1.80:1.00:17.46	14756	Bradyrhizobiaceae	Rhodopseudomonas	Uncharacterized protein OS=Rhodopseudomonas faecalis OX=99655 GN=BJ122_11119 PE=4 SV=1
363	20703	tr|A0A5M6I2M1|A0A5M6I2M1_9RHIZ	56.04	47	16	8	6380000	5460000	10700000	3460000	30800000	29300000	26600000	26400000	102000000	103000000	101000000	92100000	0.21:0.18:0.35:0.11:1.00:0.95:0.86:0.86:3.31:3.36:3.27:2.99	6640000	28300000	99600000	0.23:1.00:3.52	42340	Blastochloridaceae	Blastochloris	Succinate--CoA ligase [ADP-forming] subunit beta OS=Blastochloris sulfoviridis OX=50712 GN=sucC PE=3 SV=1
270	756	tr|A0A4V2WAN2|A0A4V2WAN2_MARGR	54.53	14	15	3	26600000	25600000	31300000	27400000	104000000	114000000	107000000	92800000	101000000	99800000	136000000	140000000	0.26:0.25:0.30:0.26:1.00:1.09:1.03:0.89:0.97:0.96:1.31:1.35	27800000	105000000	119000000	0.27:1.00:1.14	168891	Chromatiaceae	Marichromatium	Glutamate synthase (NADH) large subunit OS=Marichromatium gracile OX=1048 GN=EDC29_101336 PE=3 SV=1
4141	61771	tr|A0A2T4J9V9|A0A2T4J9V9_RHOBL	31.04	6	2	2	304000000	307000000	282000000	331000000	251000000	255000000	432000000	458000000	101000000	106000000	69500000	72200000	1.21:1.22:1.12:1.32:1.00:1.02:1.72:1.82:0.40:0.42:0.28:0.29	306000000	349000000	87400000	0.88:1.00:0.25	34522	Rhodobacteraceae	0	Reaction center protein M chain OS=Rhodobacter blasticus DSM 2131 OX=1188250 GN=C5F44_07750 PE=3 SV=1 Reaction center protein M chain OS=Rhodobacteraceae bacterium OX=1904441 GN=DDY29_14625 PE=3 SV=1 Reaction center protein M chain OS=Rhodobacteraceae bacterium OX=1904441 GN=CML66_26865 PE=3 SV=1
2381	3743	tr|A0A318TD31|A0A318TD31_9BRAD	59.45	40	7	3	14100000	14600000	8000000	8240000	4070000	4520000	5130000	5850000	100000000	84000000	82100000	100000000	3.46:3.59:1.97:2.03:1.00:1.11:1.26:1.44:24.61:20.66:20.18:24.63	11200000	5070000	91600000	2.21:1.00:18.06	14846	Bradyrhizobiaceae	Rhodopseudomonas	Cytochrome c OS=Rhodopseudomonas faecalis OX=99655 GN=BJ122_110128 PE=4 SV=1
3799	24199	tr|A0A318TG42|A0A318TG42_9BRAD	0	11	4	4	102000	219000	165000	0	0	37700	0	0	100000000	63400000	68900000	97600000	64.00:64.00:64.00:-:-:64.00:-:-:64.00:64.00:64.00:64.00	294000	37700	83500000	7.79:1.00:64.00	42802	Bradyrhizobiaceae	Rhodopseudomonas	Membrane fusion protein (Multidrug efflux system) OS=Rhodopseudomonas faecalis OX=99655 GN=BJ122_11087 PE=3 SV=1
709	50620	tr|A0A2T4JA45|A0A2T4JA45_RHOBL	77.84	28	8	7	13700000	13700000	13300000	14800000	5260000	5020000	6690000	3660000	99700000	107000000	104000000	109000000	2.60:2.60:2.53:2.81:1.00:0.95:1.27:0.70:18.95:20.37:19.83:20.63	13900000	5890000	105000000	2.35:1.00:17.81	40387	Rhodobacteraceae	Rhodobacter	Branched-chain amino acid ABC transporter substrate-binding protein OS=Rhodobacter blasticus DSM 2131 OX=1188250 GN=C5F44_08220 PE=4 SV=1
65	20522	tr|A0A318TJ74|A0A318TJ74_9BRAD	57.34	48	20	9	27000000	27200000	25600000	38800000	21400000	24200000	19300000	21900000	99400000	113000000	102000000	101000000	1.26:1.27:1.20:1.82:1.00:1.13:0.90:1.03:4.65:5.30:4.80:4.74	29700000	22300000	104000000	1.33:1.00:4.67	58328	Bradyrhizobiaceae	Rhodopseudomonas	Phosphoenolpyruvate carboxykinase (ATP) OS=Rhodopseudomonas faecalis OX=99655 GN=pckA PE=3 SV=1
373	2482	tr|A0A318TPP8|A0A318TPP8_9BRAD	41.69	29	12	10	22300000	23100000	17300000	15200000	12000000	13300000	6840000	6390000	97500000	98600000	89100000	84600000	1.85:1.92:1.44:1.27:1.00:1.10:0.57:0.53:8.11:8.21:7.41:7.04	19500000	9630000	92500000	2.02:1.00:9.60	58917	Bradyrhizobiaceae	Rhodopseudomonas	Uncharacterized protein OS=Rhodopseudomonas faecalis OX=99655 GN=BJ122_105153 PE=4 SV=1
2950	4002	tr|A0A318THJ9|A0A318THJ9_9BRAD	60.22	29	5	5	13800000	16500000	14700000	13100000	6170000	7010000	9970000	10300000	97000000	97100000	93400000	84700000	2.24:2.67:2.38:2.12:1.00:1.14:1.62:1.66:15.72:15.73:15.13:13.72	14500000	8350000	93000000	1.74:1.00:11.14	21045	Bradyrhizobiaceae	Rhodopseudomonas	50S ribosomal protein L9 OS=Rhodopseudomonas faecalis OX=99655 GN=rplI PE=3 SV=1
263	6134	tr|A0A318TYX3|A0A318TYX3_9BRAD	41.6	52	16	10	607000	1450000	2040000	1490000	1160000	403000	2320000	1600000	96800000	75100000	59000000	69600000	0.52:1.25:1.75:1.28:1.00:0.35:2.00:1.37:64.00:64.00:50.80:59.88	1750000	1510000	75100000	1.16:1.00:49.89	44851	Bradyrhizobiaceae	Rhodopseudomonas	Amino acid/amide ABC transporter substrate-binding protein (HAAT family) OS=Rhodopseudomonas faecalis OX=99655 GN=BJ122_10254 PE=4 SV=1
268	21459	tr|A0A318T8W5|A0A318T8W5_9BRAD	57.39	60	13	9	15400000	15400000	7000000	6100000	4260000	2900000	4370000	3790000	96700000	91100000	116000000	124000000	3.61:3.62:1.64:1.43:1.00:0.68:1.03:0.89:22.70:21.40:27.14:29.06	11000000	3830000	107000000	2.87:1.00:27.89	23077	Bradyrhizobiaceae	Rhodopseudomonas	Polyhydroxyalkanoate synthesis repressor PhaR OS=Rhodopseudomonas faecalis OX=99655 GN=BJ122_12151 PE=4 SV=1
5091	5080	tr|A0A318TKZ9|A0A318TKZ9_9BRAD	37.56	21	2	2	33600000	33100000	17800000	17000000	7650000	7650000	13700000	12900000	96400000	101000000	78000000	77900000	4.39:4.33:2.32:2.22:1.00:1.00:1.80:1.69:12.60:13.20:10.19:10.18	25400000	10500000	88300000	2.42:1.00:8.42	12171	Bradyrhizobiaceae	Rhodopseudomonas	Lectin-like protein BA14k OS=Rhodopseudomonas faecalis OX=99655 GN=BJ122_101235 PE=3 SV=1
455	4237	tr|A0A318T9W3|A0A318T9W3_9BRAD	29.71	42	15	5	2930000	1030000	2360000	3770000	3150000	3920000	1310000	172000	96200000	80100000	40500000	26400000	0.93:0.33:0.75:1.20:1.00:1.24:0.41:0.05:30.53:25.43:12.87:8.37	2760000	2320000	60800000	1.19:1.00:26.16	45333	Bradyrhizobiaceae	Rhodopseudomonas	Cytochrome-dependent sulfide dehydrogenase (Flavoprotein) OS=Rhodopseudomonas faecalis OX=99655 GN=BJ122_11654 PE=4 SV=1
2923	27491	tr|A0A318TV96|A0A318TV96_9BRAD	60.89	72	4	4	0	0	0	0	249000	354000	257000	384000	95500000	109000000	87800000	90200000	0:0:0:0:1.00:1.42:1.03:1.54:64.00:64.00:64.00:64.00	0	311000	103000000	0:1.00:64.00	7381	Bradyrhizobiaceae	Rhodopseudomonas	Hemin uptake protein HemP OS=Rhodopseudomonas faecalis OX=99655 GN=BJ122_106100 PE=4 SV=1
864	12094	tr|A0A318TA03|A0A318TA03_9BRAD	47.76	36	8	6	5170000	5430000	3280000	3710000	2480000	2810000	233000	2540000	95000000	141000000	90100000	81200000	2.08:2.19:1.32:1.49:1.00:1.13:0.09:1.02:38.25:56.87:36.29:32.70	4740000	2370000	102000000	2.00:1.00:43.06	22179	Bradyrhizobiaceae	Rhodopseudomonas	Uncharacterized protein DUF2147 OS=Rhodopseudomonas faecalis OX=99655 GN=BJ122_12017 PE=4 SV=1
17	5460	tr|A0A318THI8|A0A318THI8_9BRAD	31.4	56	31	16	38800000	38500000	25800000	25200000	29900000	21200000	36100000	41700000	93200000	102000000	85800000	85100000	1.30:1.29:0.86:0.84:1.00:0.71:1.21:1.39:3.12:3.43:2.87:2.85	34200000	32500000	91600000	1.05:1.00:2.82	80305	Bradyrhizobiaceae	Rhodopseudomonas	Catalase-peroxidase OS=Rhodopseudomonas faecalis OX=99655 GN=katG PE=3 SV=1
2794	24350	tr|A0A318TLM3|A0A318TLM3_9BRAD	38.17	20	4	4	26600000	23100000	1810000	3510000	10700000	9010000	15200000	13900000	93000000	95100000	72100000	64700000	2.48:2.15:0.17:0.33:1.00:0.84:1.42:1.29:8.66:8.86:6.72:6.03	16500000	12200000	81200000	1.35:1.00:6.65	35738	Bradyrhizobiaceae	Rhodopseudomonas	Pimeloyl-ACP methyl ester carboxylesterase OS=Rhodopseudomonas faecalis OX=99655 GN=BJ122_110102 PE=4 SV=1
655	21047	tr|A0A318T985|A0A318T985_9BRAD	20.53	33	12	5	139000000	142000000	122000000	110000000	82900000	90300000	96500000	90800000	92900000	100000000	83100000	94500000	1.68:1.72:1.48:1.32:1.00:1.09:1.16:1.10:1.12:1.21:1.00:1.14	128000000	90100000	92700000	1.42:1.00:1.03	41117	Bradyrhizobiaceae	Rhodopseudomonas	DNA-directed RNA polymerase subunit alpha OS=Rhodopseudomonas faecalis OX=99655 GN=rpoA PE=3 SV=1
3427	55830	tr|A0A7C9GX48|A0A7C9GX48_9RHIZ	44.69	14	4	3	14200000	13800000	8720000	7100000	42400000	38900000	47500000	39100000	92400000	100000000	98900000	82600000	0.34:0.33:0.21:0.17:1.00:0.92:1.12:0.92:2.18:2.36:2.33:1.95	11000000	42000000	94400000	0.26:1.00:2.25	40212	Phyllobacteriaceae	Phyllobacterium	ABC transporter substrate-binding protein OS=Phyllobacterium sp. SYP-B3895 OX=2663240 GN=GF108_12660 PE=3 SV=1
4881	33013	tr|A0A521LDY9|A0A521LDY9_9BRAD	62.02	16	3	2	1180000	10600000	629000	214000	29800000	29200000	27800000	27300000	92300000	96100000	104000000	94900000	0.04:0.36:0.02:0.02:1.00:0.98:0.93:0.92:3.09:3.22:3.49:3.18	3340000	28500000	96800000	0.12:1.00:3.39	16914	Boseaceae	Bosea	Glutathione-dependent peroxiredoxin OS=Bosea sp. OX=1871050 GN=EPO59_13775 PE=3 SV=1
4869	29202	tr|W3RM10|W3RM10_9BRAD	65.98	22	3	2	26200000	30600000	31700000	28800000	23000000	24400000	21700000	25600000	92100000	98400000	103000000	99900000	1.14:1.34:1.38:1.26:1.00:1.06:0.94:1.12:4.01:4.29:4.49:4.35	29300000	23600000	98400000	1.24:1.00:4.16	17401	Bradyrhizobiaceae	Afipia	Protein-export protein SecB OS=Afipia sp. P52-10 OX=1429916 GN=secB PE=3 SV=1
666	739	tr|A0A182CZY4|A0A182CZY4_BLAVI	35.42	24	7	4	15900000	16200000	4820000	4680000	13800000	8750000	10000000	16200000	92000000	107000000	70900000	59300000	1.15:1.18:0.35:0.34:1.00:0.63:0.73:1.18:6.67:7.74:5.14:4.29	11300000	12500000	86600000	0.91:1.00:6.95	43976	Blastochloridaceae	Blastochloris	Acetyl-CoA acetyltransferase OS=Blastochloris viridis OX=1079 GN=BV133_1187 PE=3 SV=1
1384	25138	tr|A0A318TEU6|A0A318TEU6_9BRAD	58.58	37	7	4	23700000	11100000	11600000	11500000	6000000	6560000	4810000	5270000	91900000	84200000	95400000	81400000	3.96:1.85:1.93:1.92:1.00:1.09:0.80:0.88:15.32:14.04:15.91:13.57	14900000	5930000	88200000	2.50:1.00:14.88	19585	Bradyrhizobiaceae	Rhodopseudomonas	Putative surface protein with fasciclin (FAS1) repeats OS=Rhodopseudomonas faecalis OX=99655 GN=BJ122_1126 PE=4 SV=1
3	20503	tr|A0A318TNT9|A0A318TNT9_9BRAD	58.82	27	39	22	1830000	2020000	2100000	1980000	10200000	4190000	8750000	8800000	90800000	93400000	123000000	122000000	0.18:0.20:0.21:0.19:1.00:0.41:0.86:0.87:8.93:9.19:12.11:11.99	2220000	8030000	114000000	0.28:1.00:14.20	186440	Bradyrhizobiaceae	Rhodopseudomonas	Uncharacterized protein OS=Rhodopseudomonas faecalis OX=99655 GN=BJ122_101311 PE=3 SV=1
288	50721	tr|A0A2T0PH78|A0A2T0PH78_RHITR	56.6	33	12	2	8700000	9780000	7580000	7960000	4410000	5100000	6270000	6940000	89200000	90600000	66600000	70300000	1.98:2.22:1.72:1.81:1.00:1.16:1.42:1.58:20.26:20.57:15.12:15.96	8690000	5750000	79200000	1.51:1.00:13.78	52393	Rhizobiaceae	Rhizobium	Glutamine synthetase OS=Rhizobium tropici OX=398 GN=NA75_101384 PE=3 SV=1
2002	26400	tr|A0A318TND8|A0A318TND8_9BRAD	28.67	31	5	3	8610000	9020000	5370000	1020000	1740000	1340000	4570000	5490000	88500000	90300000	59400000	30600000	4.95:5.19:3.09:0.59:1.00:0.77:2.63:3.16:50.94:51.95:34.16:17.61	7020000	3280000	78300000	2.14:1.00:23.86	20051	Bradyrhizobiaceae	Rhodopseudomonas	CreA protein OS=Rhodopseudomonas faecalis OX=99655 GN=BJ122_101129 PE=4 SV=1
376	971	tr|A0A182CXG1|A0A182CXG1_BLAVI	50.96	32	13	3	8330000	8940000	5680000	6720000	32900000	30600000	35100000	40900000	87900000	87200000	77800000	79500000	0.25:0.27:0.17:0.20:1.00:0.93:1.07:1.24:2.67:2.65:2.36:2.41	7420000	34900000	83100000	0.21:1.00:2.38	52184	Blastochloridaceae	Blastochloris	Glutamine synthetase OS=Blastochloris viridis OX=1079 GN=BV133_282 PE=3 SV=1
354	5742	tr|A0A318TNC7|A0A318TNC7_9BRAD	42.22	33	11	6	14700000	11400000	7740000	8320000	12800000	10900000	7610000	7530000	87600000	79400000	63800000	52600000	1.15:0.89:0.60:0.65:1.00:0.85:0.59:0.59:6.84:6.20:4.98:4.10	10900000	9720000	70900000	1.12:1.00:7.29	49547	Bradyrhizobiaceae	Rhodopseudomonas	Tryptophan synthase beta chain OS=Rhodopseudomonas faecalis OX=99655 GN=trpB PE=3 SV=1
2468	25842	tr|A0A5M6I5W5|A0A5M6I5W5_9RHIZ	36.85	21	4	4	4280000	9230000	8710000	11600000	25500000	35000000	39200000	42300000	86600000	72100000	103000000	94800000	0.17:0.36:0.34:0.46:1.00:1.37:1.54:1.66:3.40:2.83:4.04:3.72	10100000	35500000	89100000	0.29:1.00:2.51	25280	Blastochloridaceae	Blastochloris	50S ribosomal protein L3 OS=Blastochloris sulfoviridis OX=50712 GN=rplC PE=3 SV=1
530	21033	tr|A0A348G1Z0|A0A348G1Z0_9RHIZ	55.58	49	13	13	5610000	6730000	4270000	3730000	12500000	12700000	14000000	16000000	85700000	90700000	81200000	82000000	0.45:0.54:0.34:0.30:1.00:1.01:1.12:1.28:6.86:7.26:6.50:6.56	5120000	13800000	84900000	0.37:1.00:6.15	36278	Blastochloridaceae	Blastochloris	Membrane protein OS=Blastochloris tepida OX=2233851 GN=BLTE_22580 PE=4 SV=1
45	2817	tr|A0A348FYV9|A0A348FYV9_9RHIZ	38.68	19	25	7	6970000	8120000	3930000	3400000	52300000	58200000	38700000	46000000	85600000	85400000	104000000	89100000	0.13:0.16:0.08:0.06:1.00:1.11:0.74:0.88:1.64:1.63:1.99:1.70	5650000	48800000	91100000	0.12:1.00:1.87	178526	Blastochloridaceae	Blastochloris	Uncharacterized protein OS=Blastochloris tepida OX=2233851 GN=BLTE_11770 PE=3 SV=1
4863	28852	tr|A0A318T8F9|A0A318T8F9_9BRAD	50.97	26	3	3	10700000	9440000	6430000	6100000	4750000	4980000	6820000	6010000	85300000	65400000	55600000	55700000	2.26:1.99:1.35:1.28:1.00:1.05:1.44:1.26:17.95:13.77:11.69:11.72	8180000	5650000	66800000	1.45:1.00:11.83	15736	Bradyrhizobiaceae	Rhodopseudomonas	Uncharacterized protein DUF992 OS=Rhodopseudomonas faecalis OX=99655 GN=BJ122_13124 PE=4 SV=1
416	20814	tr|A0A318TM48|A0A318TM48_9BRAD	54.48	58	14	14	15200000	16700000	17700000	16200000	25300000	22100000	13500000	21000000	84300000	105000000	86300000	84500000	0.60:0.66:0.70:0.64:1.00:0.87:0.53:0.83:3.33:4.13:3.41:3.34	16900000	23000000	95600000	0.74:1.00:4.16	36486	Bradyrhizobiaceae	Rhodopseudomonas	Fructose-bisphosphate aldolase OS=Rhodopseudomonas faecalis OX=99655 GN=BJ122_10966 PE=3 SV=1
2398	23614	tr|A0A318TK61|A0A318TK61_9BRAD	27.97	38	6	6	13000000	11000000	3500000	3390000	40400000	42900000	63300000	57600000	83900000	98600000	98600000	102000000	0.32:0.27:0.09:0.08:1.00:1.06:1.57:1.42:2.08:2.44:2.44:2.53	7870000	51000000	96100000	0.15:1.00:1.88	21447	Bradyrhizobiaceae	Rhodopseudomonas	Putative peroxidase-related enzyme OS=Rhodopseudomonas faecalis OX=99655 GN=BJ122_102332 PE=4 SV=1
4179	28347	tr|A0A348G4V5|A0A348G4V5_9RHIZ	40.17	53	3	3	2710000	5690000	4770000	6290000	20700000	28700000	51600000	58600000	83600000	117000000	70000000	87100000	0.13:0.28:0.23:0.30:1.00:1.39:2.50:2.84:4.05:5.67:3.39:4.22	5800000	40000000	89500000	0.15:1.00:2.24	15311	Blastochloridaceae	Blastochloris	ATP synthase epsilon chain OS=Blastochloris tepida OX=2233851 GN=atpC_2 PE=3 SV=1
2961	24789	tr|A0A318TD51|A0A318TD51_9BRAD	48.72	35	4	4	1270000	614000	1690000	1710000	7540000	7790000	11800000	13400000	83400000	77400000	112000000	111000000	0.17:0.08:0.22:0.23:1.00:1.03:1.57:1.78:11.06:10.26:14.90:14.66	1560000	10200000	96500000	0.15:1.00:9.43	15601	Bradyrhizobiaceae	Rhodopseudomonas	Phasin OS=Rhodopseudomonas faecalis OX=99655 GN=BJ122_11156 PE=4 SV=1
2888	4176	tr|A0A318THD2|A0A318THD2_9BRAD	59.99	23	5	5	12500000	15100000	12500000	15500000	6230000	7660000	5080000	5640000	80500000	76700000	88200000	80700000	2.01:2.43:2.01:2.49:1.00:1.23:0.82:0.90:12.92:12.31:14.16:12.96	13900000	6150000	81500000	2.26:1.00:13.25	28996	Bradyrhizobiaceae	Rhodopseudomonas	Enoyl-CoA hydratase/carnithine racemase OS=Rhodopseudomonas faecalis OX=99655 GN=BJ122_12528 PE=3 SV=1
417	20888	tr|A0A318TFY1|A0A318TFY1_9BRAD	56.76	35	11	11	2330000	2910000	2660000	1820000	3150000	5030000	2460000	2340000	79900000	76100000	92300000	76300000	0.74:0.92:0.85:0.58:1.00:1.60:0.78:0.74:25.37:24.15:29.29:24.23	2430000	3320000	81500000	0.73:1.00:24.51	35184	Bradyrhizobiaceae	Rhodopseudomonas	Hydroxymethylbilane synthase OS=Rhodopseudomonas faecalis OX=99655 GN=BJ122_11094 PE=3 SV=1
1379	5477	tr|A0A5M6I674|A0A5M6I674_9RHIZ	41.86	23	10	9	11000000	10100000	5270000	9080000	22600000	19700000	26700000	27000000	79800000	71500000	72600000	70000000	0.49:0.45:0.23:0.40:1.00:0.87:1.18:1.20:3.54:3.17:3.22:3.10	8860000	24000000	73500000	0.37:1.00:3.07	54753	Blastochloridaceae	Blastochloris	Heme biosynthesis protein HemY OS=Blastochloris sulfoviridis OX=50712 GN=F1193_01130 PE=4 SV=1
854	22168	tr|A0A5M6I5Y7|A0A5M6I5Y7_9RHIZ	43.6	35	9	5	7270000	10000000	6620000	6130000	29700000	25200000	45500000	46800000	79100000	77400000	67700000	74600000	0.24:0.34:0.22:0.21:1.00:0.85:1.53:1.58:2.66:2.61:2.28:2.51	7560000	36800000	74700000	0.21:1.00:2.03	36843	Blastochloridaceae	Blastochloris	Ketol-acid reductoisomerase (NADP(+)) OS=Blastochloris sulfoviridis OX=50712 GN=ilvC PE=3 SV=1
2801	28110	tr|A0A348FW26|A0A348FW26_9RHIZ	25.19	30	4	4	8850000	8870000	5450000	4610000	18600000	21200000	22500000	22200000	78900000	64000000	88700000	30900000	0.48:0.48:0.29:0.25:1.00:1.15:1.21:1.20:4.25:3.45:4.78:1.66	6970000	21400000	66300000	0.33:1.00:3.10	9813	Blastochloridaceae	Blastochloris	SWIB domain-containing protein OS=Blastochloris tepida OX=2233851 GN=BLTE_01940 PE=4 SV=1
4334	26841	tr|A0A0H5BQF2|A0A0H5BQF2_BLAVI	22.76	18	3	3	33100000	27900000	24300000	18700000	56700000	58900000	53900000	63700000	78800000	91700000	65100000	50800000	0.58:0.49:0.43:0.33:1.00:1.04:0.95:1.12:1.39:1.62:1.15:0.90	26100000	58300000	71600000	0.45:1.00:1.23	26758	Blastochloridaceae	Blastochloris	Invasion protein B OS=Blastochloris viridis OX=1079 GN=BV133_3250 PE=4 SV=1
2436	23622	tr|Q13EM8|Q13EM8_RHOPS	40.96	13	5	4	640000	2290000	1290000	474000	1070000	2430000	1020000	933000	78700000	79400000	83800000	83200000	0.60:2.15:1.21:0.44:1.00:2.28:0.95:0.87:64.00:64.00:64.00:64.00	1260000	1530000	81300000	0.83:1.00:53.07	42803	Bradyrhizobiaceae	Rhodopseudomonas	3-oxoacyl-[acyl-carrier-protein] synthase I OS=Rhodopseudomonas palustris (strain BisB5) OX=316057 GN=RPD_0221 PE=3 SV=1
2029	24738	tr|A0A318TKA6|A0A318TKA6_9BRAD	58.69	46	6	6	4690000	4700000	3020000	2950000	2100000	1620000	3020000	2800000	77800000	101000000	120000000	98000000	2.24:2.24:1.44:1.41:1.00:0.77:1.44:1.33:37.11:48.37:57.12:46.74	3990000	3150000	99200000	1.27:1.00:31.46	18784	Bradyrhizobiaceae	Rhodopseudomonas	DUF2059 domain-containing protein OS=Rhodopseudomonas faecalis OX=99655 GN=BJ122_102300 PE=4 SV=1
5698	31745	tr|A0A5M6HUB9|A0A5M6HUB9_9RHIZ	45.31	13	2	2	5290000	5480000	3090000	3210000	14300000	16900000	30200000	25400000	77500000	77900000	147000000	113000000	0.37:0.38:0.22:0.23:1.00:1.19:2.12:1.78:5.43:5.46:10.32:7.94	4270000	25700000	104000000	0.17:1.00:4.04	13570	Blastochloridaceae	Blastochloris	Phasin OS=Blastochloris sulfoviridis OX=50712 GN=F1193_12465 PE=4 SV=1
1386	51084	tr|A0A2T4JCA7|A0A2T4JCA7_RHOBL	32.72	29	7	6	22100000	23200000	9150000	12700000	623000	248000	55300	151000	77300000	76800000	67200000	71700000	35.53:37.26:14.68:20.40:1.00:0.40:0.09:0.24:64.00:64.00:64.00:64.00	16800000	423000	73300000	39.69:1.00:64.00	38518	Rhodobacteraceae	Rhodobacter	BMP family ABC transporter substrate-binding protein OS=Rhodobacter blasticus DSM 2131 OX=1188250 GN=C5F44_04025 PE=3 SV=1
2910	24021	tr|A0A318TGP5|A0A318TGP5_9BRAD	50.96	30	5	5	5140000	5930000	3320000	3840000	3340000	3820000	5030000	4410000	77200000	76900000	79300000	78700000	1.54:1.77:0.99:1.15:1.00:1.14:1.51:1.32:23.09:23.01:23.74:23.54	4670000	4150000	78400000	1.13:1.00:18.89	23436	Bradyrhizobiaceae	Rhodopseudomonas	Uncharacterized protein OS=Rhodopseudomonas faecalis OX=99655 GN=BJ122_10991 PE=4 SV=1
1600	31082	tr|A0A348G3H1|A0A348G3H1_9RHIZ	23.49	13	3	3	12500000	12800000	4350000	4440000	53500000	41100000	35600000	29700000	76800000	83000000	44400000	48700000	0.23:0.24:0.08:0.08:1.00:0.77:0.67:0.55:1.44:1.55:0.83:0.91	9650000	40000000	63200000	0.24:1.00:1.58	28113	Blastochloridaceae	Blastochloris	Superoxide dismutase OS=Blastochloris tepida OX=2233851 GN=sodF PE=3 SV=1
2750	26910	tr|A0A5M6HZ56|A0A5M6HZ56_9RHIZ	20.86	27	5	5	15900000	8280000	13500000	11900000	7150000	8480000	19000000	22300000	76700000	26900000	55000000	45000000	2.22:1.16:1.89:1.67:1.00:1.19:2.65:3.12:10.72:3.76:7.70:6.30	12400000	14300000	50900000	0.87:1.00:3.56	20064	Blastochloridaceae	Blastochloris	LemA family protein OS=Blastochloris sulfoviridis OX=50712 GN=F1193_09645 PE=3 SV=1
4108	28959	tr|A0A318TIX6|A0A318TIX6_9BRAD	26.37	51	4	4	54200	1620000	1310000	124000	2010000	1440000	119000	219000	75200000	72600000	85100000	74300000	0.03:0.81:0.65:0.06:1.00:0.72:0.06:0.11:37.49:36.23:42.44:37.07	1870000	1310000	76800000	1.43:1.00:58.70	9802	Bradyrhizobiaceae	Rhodopseudomonas	Uncharacterized protein OS=Rhodopseudomonas faecalis OX=99655 GN=BJ122_10247 PE=4 SV=1
2852	24515	tr|A0A318THY6|A0A318THY6_9BRAD	46.06	24	6	6	19200000	21300000	13800000	14600000	14700000	12700000	18200000	17600000	74700000	69300000	63400000	58000000	1.30:1.44:0.94:0.99:1.00:0.86:1.24:1.19:5.07:4.70:4.30:3.93	17700000	15800000	67500000	1.12:1.00:4.26	28051	Bradyrhizobiaceae	Rhodopseudomonas	Uncharacterized protein OS=Rhodopseudomonas faecalis OX=99655 GN=BJ122_103114 PE=4 SV=1
898	22062	tr|Q07PK3|Q07PK3_RHOP5	72.84	15	9	2	7160000	8550000	3200000	2670000	5110000	5120000	4560000	4840000	73800000	76000000	83500000	86200000	1.40:1.67:0.63:0.52:1.00:1.00:0.89:0.95:14.44:14.86:16.34:16.85	6870000	5060000	79900000	1.36:1.00:15.77	64494	Bradyrhizobiaceae	Rhodopseudomonas	Acetolactate synthase OS=Rhodopseudomonas palustris (strain BisA53) OX=316055 GN=RPE_2187 PE=3 SV=1
2356	51042	tr|A0A5M6HLI7|A0A5M6HLI7_9RHIZ	56.72	16	6	3	833000	3320000	1750000	1020000	18100000	20900000	18400000	17300000	73700000	82600000	76100000	70400000	0.05:0.18:0.10:0.06:1.00:1.16:1.02:0.96:4.08:4.57:4.21:3.90	2860000	18900000	76200000	0.15:1.00:4.02	52456	Blastochloridaceae	Blastochloris	Inosine-5'-monophosphate dehydrogenase OS=Blastochloris sulfoviridis OX=50712 GN=guaB PE=3 SV=1
2776	2844	tr|A0A4R3N1I1|A0A4R3N1I1_9GAMM	47.51	26	6	6	36400000	27500000	28700000	32900000	32800000	36500000	34900000	38800000	73500000	80700000	77500000	69000000	1.11:0.84:0.87:1.00:1.00:1.11:1.06:1.18:2.24:2.46:2.36:2.10	31400000	35700000	76300000	0.88:1.00:2.13	32355	Chromatiaceae	Thiobaca	Hydrogenase nickel incorporation protein HypB OS=Thiobaca trueperi OX=127458 GN=EDC35_10329 PE=3 SV=1
2978	53712	tr|A0A2M8ZJG5|A0A2M8ZJG5_9BRAD	37.35	33	5	5	7960000	9000000	4270000	5190000	1560000	3400000	4870000	5410000	73500000	67200000	60600000	63700000	5.11:5.77:2.74:3.33:1.00:2.18:3.12:3.47:47.16:43.12:38.86:40.85	6900000	4610000	66200000	1.50:1.00:14.38	14594	0	0	30S ribosomal protein S8 OS=Afipia broomeae OX=56946 GN=rpsH PE=3 SV=1 30S ribosomal protein S8 OS=Rhizobium tropici OX=398 GN=rpsH PE=3 SV=1 30S ribosomal protein S8 OS=Streptomyces sp. AcH 505 OX=352211 GN=rpsH PE=3 SV=1
120	20554	tr|A0A318TBQ9|A0A318TBQ9_9BRAD	41.26	55	21	17	4200000	4470000	7830000	7900000	3950000	2950000	6920000	7090000	73100000	58000000	75800000	59200000	1.06:1.13:1.98:2.00:1.00:0.75:1.75:1.80:18.51:14.68:19.18:14.97	6480000	5230000	66500000	1.24:1.00:12.73	48985	Bradyrhizobiaceae	Rhodopseudomonas	Dihydrolipoyl dehydrogenase OS=Rhodopseudomonas faecalis OX=99655 GN=BJ122_11419 PE=3 SV=1
1694	22965	tr|A0A2R4GYQ3|A0A2R4GYQ3_RHOPL	70.82	20	8	5	4820000	4500000	4580000	4730000	3870000	4370000	4100000	4920000	72100000	66700000	63300000	60800000	1.24:1.16:1.18:1.22:1.00:1.13:1.06:1.27:18.61:17.23:16.34:15.71	4660000	4360000	65700000	1.07:1.00:15.09	36987	Bradyrhizobiaceae	Rhodopseudomonas	Ferredoxin--NADP reductase OS=Rhodopseudomonas palustris OX=1076 GN=RPYSC3_39990 PE=3 SV=1
4143	64774	tr|A0A2T4JDC4|A0A2T4JDC4_RHOBL	49.17	12	3	3	896000	131000	756000	1010000	1160000	537000	526000	569000	72100000	74800000	44800000	63100000	0.77:0.11:0.65:0.87:1.00:0.46:0.45:0.49:62.16:64.00:38.64:54.47	697000	928000	65000000	0.75:1.00:64.00	28059	Rhodobacteraceae	Rhodobacter	DUF4198 domain-containing protein OS=Rhodobacter blasticus DSM 2131 OX=1188250 GN=C5F44_02330 PE=4 SV=1
722	20879	tr|A0A318TGV5|A0A318TGV5_9BRAD	53.6	44	13	13	5190000	5500000	1630000	2630000	1380000	959000	809000	1060000	72000000	77800000	72100000	65600000	3.75:3.97:1.18:1.90:1.00:0.69:0.58:0.76:52.02:56.20:52.05:47.41	3850000	1240000	71900000	3.11:1.00:58.15	37514	Bradyrhizobiaceae	Rhodopseudomonas	Tripartite ATP-independent transporter DctP family solute receptor OS=Rhodopseudomonas faecalis OX=99655 GN=BJ122_105152 PE=3 SV=1
3454	24320	tr|A0A4R3LYW5|A0A4R3LYW5_9RHIZ	57.08	25	5	5	2810000	1980000	2240000	1920000	5800000	4030000	3190000	933000	71500000	54200000	49100000	57300000	0.48:0.34:0.39:0.33:1.00:0.69:0.55:0.16:12.34:9.35:8.47:9.88	2260000	4450000	58000000	0.51:1.00:13.05	32043	Hyphomicrobiaceae	Aquabacter	3-hydroxyacyl-CoA dehydrogenase OS=Aquabacter spiritensis OX=933073 GN=EDC64_10325 PE=3 SV=1
262	20756	tr|A0A318T8E0|A0A318T8E0_9BRAD	51.09	38	17	4	14700000	14500000	10600000	9310000	12400000	10800000	9520000	8700000	71400000	59200000	57700000	58400000	1.18:1.17:0.85:0.75:1.00:0.87:0.76:0.70:5.74:4.76:4.63:4.69	12700000	10900000	62000000	1.17:1.00:5.71	51684	Bradyrhizobiaceae	Rhodopseudomonas	Adenosylhomocysteinase OS=Rhodopseudomonas faecalis OX=99655 GN=ahcY PE=3 SV=1
440	22981	tr|A0A2M8ZIN8|A0A2M8ZIN8_9BRAD	46.3	20	10	2	11400000	7820000	4950000	6130000	4350000	3580000	5990000	6330000	71100000	53700000	68800000	67200000	2.61:1.80:1.14:1.41:1.00:0.82:1.38:1.45:16.36:12.34:15.81:15.45	7570000	5060000	65200000	1.49:1.00:12.88	52292	Bradyrhizobiaceae	Afipia	Glutamine synthetase OS=Afipia broomeae OX=56946 GN=BKA77_2175 PE=3 SV=1
634	20800	tr|A0A318TDC2|A0A318TDC2_9BRAD	52.64	31	14	14	39300000	39300000	35800000	27300000	17400000	14900000	14900000	14000000	70900000	70600000	76500000	58900000	2.25:2.26:2.05:1.56:1.00:0.86:0.85:0.80:4.07:4.05:4.39:3.38	35500000	15700000	69200000	2.27:1.00:4.42	54021	Bradyrhizobiaceae	Rhodopseudomonas	Acyl-CoA synthetase (AMP-forming)/AMP-acid ligase II OS=Rhodopseudomonas faecalis OX=99655 GN=BJ122_10911 PE=4 SV=1
1362	6626	tr|A0A0P0J928|A0A0P0J928_BLAVI	31.66	23	8	2	10300000	8970000	21100000	15000000	40300000	28700000	51900000	54100000	70700000	79600000	107000000	90100000	0.25:0.22:0.52:0.37:1.00:0.71:1.29:1.34:1.76:1.98:2.66:2.24	13800000	43700000	86900000	0.32:1.00:1.99	36315	Blastochloridaceae	Blastochloris	C4-dicarboxylate-binding periplasmic protein OS=Blastochloris viridis OX=1079 GN=dctP_1 PE=3 SV=1
452	20858	tr|Q89EF9|Q89EF9_BRADU	49.49	39	12	2	8460000	8170000	6190000	5860000	7050000	6900000	8640000	9790000	70200000	66400000	68300000	68200000	1.20:1.16:0.88:0.83:1.00:0.98:1.23:1.39:9.96:9.42:9.69:9.68	7170000	8090000	68300000	0.89:1.00:8.44	40476	Bradyrhizobiaceae	Bradyrhizobium	NAD(P)+ transhydrogenase OS=Bradyrhizobium diazoefficiens (strain JCM 10833 / BCRC 13528 / IAM 13628 / NBRC 14792 / USDA 110) OX=224911 GN=pntA PE=3 SV=1
472	21003	tr|A0A318TI72|A0A318TI72_9BRAD	59.7	36	11	10	2680000	3770000	2080000	3880000	3720000	3260000	4870000	3930000	70200000	78600000	63600000	62900000	0.72:1.01:0.56:1.04:1.00:0.88:1.31:1.06:18.88:21.15:17.12:16.94	3310000	4500000	68800000	0.74:1.00:15.30	33588	Bradyrhizobiaceae	Rhodopseudomonas	Parvulin-like PPIase OS=Rhodopseudomonas faecalis OX=99655 GN=BJ122_12175 PE=3 SV=1
591	686	tr|A0A5M6HLK3|A0A5M6HLK3_9RHIZ	23.19	46	13	10	72400000	89700000	41800000	53400000	123000000	149000000	168000000	216000000	70000000	81900000	74300000	61500000	0.59:0.73:0.34:0.43:1.00:1.21:1.36:1.75:0.57:0.66:0.60:0.50	64400000	210000000	78200000	0.31:1.00:0.37	46553	Blastochloridaceae	Blastochloris	Bifunctional O-acetylhomoserine aminocarboxypropyltransferase/cysteine synthase OS=Blastochloris sulfoviridis OX=50712 GN=F1193_15410 PE=3 SV=1
2034	51332	tr|A0A2T4JCW1|A0A2T4JCW1_RHOBL	33.39	39	7	7	28100000	29100000	23600000	21300000	16000000	12200000	22800000	21000000	69700000	59200000	48700000	54900000	1.76:1.82:1.48:1.34:1.00:0.77:1.43:1.32:4.37:3.71:3.05:3.44	25500000	18100000	58200000	1.41:1.00:3.21	22128	Rhodobacteraceae	Rhodobacter	OmpA-like domain-containing protein OS=Rhodobacter blasticus DSM 2131 OX=1188250 GN=C5F44_03910 PE=4 SV=1
4186	28804	tr|A0A318THP8|A0A318THP8_9BRAD	49.65	20	4	4	10400000	8270000	7480000	2210000	2250000	1330000	2280000	2250000	68700000	78700000	51200000	50000000	4.62:3.67:3.32:0.98:1.00:0.59:1.01:1.00:30.51:34.97:22.72:22.19	8690000	2130000	62100000	4.08:1.00:29.19	27443	Bradyrhizobiaceae	Rhodopseudomonas	3-hydroxybutyrate dehydrogenase OS=Rhodopseudomonas faecalis OX=99655 GN=BJ122_111108 PE=4 SV=1
1958	22639	tr|A0A318THH4|A0A318THH4_9BRAD	54.6	29	6	6	1030000	1190000	1120000	1150000	1430000	1530000	1380000	836000	68500000	78800000	60400000	100000000	0.72:0.83:0.78:0.80:1.00:1.06:0.97:0.58:47.77:54.95:42.11:64.00	1170000	1310000	80400000	0.90:1.00:61.61	37592	Bradyrhizobiaceae	Rhodopseudomonas	Nitronate monooxygenase OS=Rhodopseudomonas faecalis OX=99655 GN=BJ122_10781 PE=4 SV=1
2378	3352	tr|A0A5M6I550|A0A5M6I550_9RHIZ	22.62	37	6	5	6480000	6440000	2360000	842000	5050000	4610000	22700000	20700000	68400000	73900000	50800000	52400000	1.28:1.28:0.47:0.17:1.00:0.91:4.50:4.10:13.56:14.65:10.07:10.39	4420000	14300000	61600000	0.31:1.00:4.32	16253	Blastochloridaceae	Blastochloris	Host attachment protein OS=Blastochloris sulfoviridis OX=50712 GN=F1193_01560 PE=4 SV=1
1390	10417	tr|Q13AV5|Q13AV5_RHOPS	81.03	35	7	4	1430000	1210000	1180000	1370000	5090000	4370000	4260000	3760000	67900000	69400000	64100000	56600000	0.28:0.24:0.23:0.27:1.00:0.86:0.84:0.74:13.34:13.63:12.59:11.10	1300000	4450000	64500000	0.29:1.00:14.51	29663	Bradyrhizobiaceae	Rhodopseudomonas	ATPase associated with various cellular activities AAA_5 OS=Rhodopseudomonas palustris (strain BisB5) OX=316057 GN=RPD_1547 PE=4 SV=1
2019	22064	tr|A0A6N8DUL3|A0A6N8DUL3_9RHIZ	36.2	24	7	6	520000000	536000000	808000000	567000000	948000000	1040000000	714000000	708000000	67500000	63800000	23700000	55400000	0.55:0.57:0.85:0.60:1.00:1.10:0.75:0.75:0.07:0.07:0.03:0.06	608000000	853000000	52600000	0.71:1.00:0.06	38129	Hyphomicrobiaceae	Rhodoplanes	Photosynthetic reaction center cytochrome c subunit OS=Rhodoplanes serenus OX=200615 GN=GJ689_00470 PE=4 SV=1
137	2077	tr|A0A318TQ69|A0A318TQ69_9BRAD	12.92	24	26	10	26700000	26100000	20200000	24500000	24500000	24000000	38100000	37700000	67000000	78900000	71900000	27800000	1.09:1.07:0.83:1.00:1.00:0.98:1.56:1.54:2.73:3.22:2.93:1.14	26000000	31600000	85100000	0.82:1.00:2.69	111065	Bradyrhizobiaceae	Rhodopseudomonas	Pyruvate orthophosphate dikinase OS=Rhodopseudomonas faecalis OX=99655 GN=BJ122_10463 PE=3 SV=1
1138	22371	tr|A0A318TAP1|A0A318TAP1_9BRAD	57.02	16	6	3	2730000	1860000	871000	5500000	7880000	7080000	6320000	5950000	66400000	57000000	70800000	67400000	0.35:0.24:0.11:0.70:1.00:0.90:0.80:0.75:8.43:7.23:8.98:8.55	3390000	7060000	65400000	0.48:1.00:9.26	78031	Bradyrhizobiaceae	Rhodopseudomonas	Phosphoribosylformylglycinamidine synthase subunit PurL OS=Rhodopseudomonas faecalis OX=99655 GN=purL PE=3 SV=1
1389	1710	tr|A0A4R3MVZ0|A0A4R3MVZ0_9GAMM	18.21	22	9	9	117000000	81600000	121000000	105000000	72300000	66300000	63100000	69300000	66200000	59500000	72000000	70600000	1.62:1.13:1.67:1.45:1.00:0.92:0.87:0.96:0.92:0.82:1.00:0.98	106000000	67700000	67100000	1.57:1.00:0.99	42991	Chromatiaceae	Thiobaca	CRISPR-associated Csy3 family protein OS=Thiobaca trueperi OX=127458 GN=EDC35_11519 PE=4 SV=1
4200	38060	tr|A0A5M6I2N4|A0A5M6I2N4_9RHIZ	47.2	15	3	3	4440000	4360000	4430000	4620000	22000000	14800000	37000000	39000000	65700000	54900000	46700000	46500000	0.20:0.20:0.20:0.21:1.00:0.67:1.68:1.77:2.98:2.49:2.12:2.11	4490000	29200000	53700000	0.15:1.00:1.84	15088	Blastochloridaceae	Blastochloris	Proton-translocating NAD(P)(+) transhydrogenase OS=Blastochloris sulfoviridis OX=50712 GN=F1193_06980 PE=4 SV=1
4888	35085	tr|A0A318TJK4|A0A318TJK4_9BRAD	1.67	54	3	3	92900000	119000000	42400000	52700000	60400000	75100000	67600000	64700000	65000000	79700000	46500000	50400000	1.54:1.97:0.70:0.87:1.00:1.24:1.12:1.07:1.08:1.32:0.77:0.83	76700000	67000000	60400000	1.15:1.00:0.90	7623	Bradyrhizobiaceae	Rhodopseudomonas	NepR domain-containing protein OS=Rhodopseudomonas faecalis OX=99655 GN=BJ122_11576 PE=4 SV=1
707	20831	tr|A0A5M6I415|A0A5M6I415_9RHIZ	34.85	40	13	13	12900000	11100000	4690000	19900000	31500000	28700000	32700000	35500000	64100000	65500000	56400000	54100000	0.41:0.35:0.15:0.63:1.00:0.91:1.04:1.13:2.04:2.08:1.79:1.72	12100000	32100000	60000000	0.38:1.00:1.87	47974	Blastochloridaceae	Blastochloris	FAD-binding oxidoreductase OS=Blastochloris sulfoviridis OX=50712 GN=F1193_03745 PE=4 SV=1
3255	26992	tr|A0A318TFB6|A0A318TFB6_9BRAD	47.97	49	5	5	4710000	6130000	3420000	3250000	2730000	5760000	2860000	2370000	64100000	79000000	50400000	57700000	1.73:2.25:1.25:1.19:1.00:2.11:1.05:0.87:23.48:28.96:18.46:21.15	4380000	3730000	62800000	1.18:1.00:16.86	19842	Bradyrhizobiaceae	Rhodopseudomonas	Inorganic pyrophosphatase OS=Rhodopseudomonas faecalis OX=99655 GN=ppa PE=3 SV=1
865	21034	tr|A0A318TAF1|A0A318TAF1_9BRAD	35.09	28	11	11	3490000	1150000	35000	764000	1200000	1200000	2840000	908000	63700000	60900000	57600000	61200000	2.92:0.96:0.03:0.64:1.00:1.00:2.37:0.76:53.20:50.84:48.11:51.11	1580000	1530000	75400000	1.03:1.00:49.15	48944	Bradyrhizobiaceae	Rhodopseudomonas	Periplasmic serine endoprotease DegP-like OS=Rhodopseudomonas faecalis OX=99655 GN=BJ122_1494 PE=3 SV=1
5105	31591	tr|A0A0N0KF23|A0A0N0KF23_9BRAD	46.32	15	2	2	2290000	752000	1460000	1740000	1940000	4540000	3570000	3660000	63700000	89900000	71000000	73200000	1.18:0.39:0.75:0.89:1.00:2.34:1.84:1.88:32.75:46.23:36.52:37.66	1560000	3430000	74400000	0.45:1.00:21.70	17439	Bradyrhizobiaceae	Rhodopseudomonas	Phasin OS=Rhodopseudomonas sp. AAP120 OX=1523430 GN=IP86_24540 PE=4 SV=1
992	10840	tr|A0A318TL71|A0A318TL71_9BRAD	44.66	47	12	9	2870000	2450000	1350000	4440000	2140000	2350000	1000000	1350000	63400000	80500000	61500000	60800000	1.34:1.15:0.63:2.07:1.00:1.10:0.47:0.63:29.64:37.66:28.75:28.42	3650000	2160000	66500000	1.69:1.00:30.82	27723	Bradyrhizobiaceae	Rhodopseudomonas	IclR family transcriptional regulator OS=Rhodopseudomonas faecalis OX=99655 GN=BJ122_111105 PE=4 SV=1
5562	39601	tr|A0A543NYL9|A0A543NYL9_9BRAD	33.17	17	2	2	16500000	12900000	6590000	6110000	2070000	2170000	5150000	5460000	62900000	65600000	48700000	55700000	7.95:6.24:3.18:2.95:1.00:1.05:2.49:2.64:30.36:31.68:23.51:26.86	10500000	3720000	58200000	2.83:1.00:15.68	8366	0	0	Acyl carrier protein OS=Bosea vestrisii OX=151416 GN=acpP PE=3 SV=1 Acyl carrier protein OS=Nitrobacter winogradskyi OX=913 GN=acpP_2 PE=3 SV=1 Acyl carrier protein OS=Methylobacterium fujisawaense OX=107400 GN=GGQ91_002921 PE=4 SV=1 Acyl carrier protein OS=Rhizobium tropici OX=398 GN=acpP PE=3 SV=1 Acyl carrier protein OS=Pacificimonas flava OX=1234595 GN=acpP PE=3 SV=1
81	5131	tr|A0A318TYT5|A0A318TYT5_9BRAD	18.51	50	15	8	227000000	213000000	112000000	159000000	89700000	80700000	108000000	98800000	62700000	90500000	75300000	71400000	2.54:2.37:1.25:1.77:1.00:0.90:1.21:1.10:0.70:1.01:0.84:0.80	178000000	95000000	82700000	1.88:1.00:0.87	39768	Bradyrhizobiaceae	Rhodopseudomonas	Amino acid/amide ABC transporter substrate-binding protein (HAAT family) OS=Rhodopseudomonas faecalis OX=99655 GN=BJ122_10214 PE=3 SV=1
198	175	tr|A0A318TAP6|A0A318TAP6_9BRAD	25.12	50	15	6	23300000	22100000	29500000	36300000	6160000	38300000	28900000	24600000	62200000	77500000	65500000	62900000	3.78:3.60:4.79:5.90:1.00:6.22:4.69:4.00:10.10:12.58:10.63:10.21	28000000	24700000	67300000	1.13:1.00:2.73	44863	Bradyrhizobiaceae	Rhodopseudomonas	Amino acid/amide ABC transporter substrate-binding protein (HAAT family) OS=Rhodopseudomonas faecalis OX=99655 GN=BJ122_13715 PE=4 SV=1
2956	23509	tr|A0A318TD12|A0A318TD12_9BRAD	50.1	49	6	6	12100000	14600000	12700000	10900000	10500000	12600000	10900000	8580000	62200000	61900000	63900000	65000000	1.16:1.39:1.21:1.04:1.00:1.20:1.04:0.82:5.94:5.91:6.10:6.21	13100000	11000000	64200000	1.18:1.00:5.81	17609	Bradyrhizobiaceae	Rhodopseudomonas	Glutathione peroxidase OS=Rhodopseudomonas faecalis OX=99655 GN=BJ122_11817 PE=3 SV=1
2401	24168	tr|A0A318TDD5|A0A318TDD5_9BRAD	29	35	5	5	770000	3500000	4260000	3400000	1070000	7420000	2350000	2590000	61900000	56000000	53800000	61200000	0.72:3.26:3.97:3.17:1.00:6.92:2.19:2.42:57.74:52.26:50.22:57.07	3730000	4460000	58200000	0.84:1.00:13.06	19882	Bradyrhizobiaceae	Rhodopseudomonas	Peptidyl-prolyl cis-trans isomerase OS=Rhodopseudomonas faecalis OX=99655 GN=BJ122_11750 PE=3 SV=1
2569	22885	tr|A0A348FWP4|A0A348FWP4_9RHIZ	26.66	13	5	4	4820000	5170000	464000	1290000	13200000	12300000	5040000	13700000	61800000	67200000	63700000	56700000	0.36:0.39:0.04:0.10:1.00:0.93:0.38:1.03:4.68:5.09:4.82:4.30	3610000	13200000	62300000	0.27:1.00:4.72	53973	Blastochloridaceae	Blastochloris	Probable cytosol aminopeptidase OS=Blastochloris tepida OX=2233851 GN=pepA PE=3 SV=1
1025	22567	tr|A0A318TCP8|A0A318TCP8_9BRAD	23.71	47	9	9	7320000	8580000	1010000	1120000	6260000	878000	1330000	346000	61700000	53800000	61200000	51300000	1.17:1.37:0.16:0.18:1.00:0.14:0.21:0.06:9.85:8.60:9.79:8.20	7610000	6930000	57800000	1.10:1.00:8.34	23449	Bradyrhizobiaceae	Rhodopseudomonas	50S ribosomal protein L25 OS=Rhodopseudomonas faecalis OX=99655 GN=rplY PE=3 SV=1
360	20771	tr|A0A318TNK5|A0A318TNK5_9BRAD	26.45	18	16	8	7620000	4320000	23900000	23600000	5300000	5220000	8340000	2130000	61500000	58100000	41700000	40200000	1.44:0.81:4.52:4.46:1.00:0.99:1.57:0.40:11.62:10.96:7.87:7.60	15000000	5250000	50400000	2.87:1.00:9.60	90769	Bradyrhizobiaceae	Rhodopseudomonas	Outer membrane protein assembly factor BamA OS=Rhodopseudomonas faecalis OX=99655 GN=bamA PE=3 SV=1
593	870	tr|A0A318T9V8|A0A318T9V8_9BRAD	42.35	42	12	6	36900000	37900000	22900000	22800000	10400000	10100000	10200000	12200000	61200000	53600000	79700000	81800000	3.54:3.64:2.19:2.19:1.00:0.97:0.98:1.17:5.86:5.14:7.63:7.84	30100000	11200000	69100000	2.68:1.00:6.15	42262	Bradyrhizobiaceae	Rhodopseudomonas	Amino acid/amide ABC transporter substrate-binding protein (HAAT family) OS=Rhodopseudomonas faecalis OX=99655 GN=BJ122_12272 PE=4 SV=1
3467	28707	tr|A0A127EUA3|A0A127EUA3_9RHIZ	45.94	16	4	4	2060000	2070000	2730000	4950000	1530000	1440000	2730000	2450000	61200000	58200000	50500000	50300000	1.35:1.35:1.79:3.24:1.00:0.94:1.79:1.61:40.11:38.16:33.12:32.98	4750000	2100000	55100000	2.27:1.00:26.28	31465	Hyphomicrobiaceae	Rhodoplanes	S-methyl-5'-thioadenosine phosphorylase OS=Rhodoplanes sp. Z2-YC6860 OX=674703 GN=mtnP PE=3 SV=1
5469	64526	tr|A0A2T4J5U9|A0A2T4J5U9_RHOBL	41.81	11	2	2	6560000	4150000	8990000	8310000	1690000	1450000	2520000	2300000	61200000	63600000	27700000	36700000	3.88:2.46:5.33:4.92:1.00:0.86:1.49:1.36:36.27:37.68:16.43:21.76	7000000	2070000	51600000	3.38:1.00:24.95	20841	Rhodobacteraceae	Rhodobacter	OMP_b-brl domain-containing protein OS=Rhodobacter blasticus DSM 2131 OX=1188250 GN=C5F44_14700 PE=4 SV=1
188	1765	tr|A0A0P0JFM7|A0A0P0JFM7_BLAVI	17.75	26	14	7	2920000	7560000	23200000	11800000	42500000	42400000	24500000	27200000	61100000	62300000	47100000	47300000	0.07:0.18:0.55:0.28:1.00:1.00:0.58:0.64:1.44:1.47:1.11:1.11	13100000	37700000	54800000	0.35:1.00:1.45	83272	Blastochloridaceae	Blastochloris	Polyribonucleotide nucleotidyltransferase OS=Blastochloris viridis OX=1079 GN=pnp PE=3 SV=1
149	818	tr|A0A0H5BP58|A0A0H5BP58_BLAVI	31.09	24	20	7	19400000	24400000	25700000	18000000	42900000	40800000	45300000	27900000	60400000	57900000	57000000	55100000	0.45:0.57:0.60:0.42:1.00:0.95:1.06:0.65:1.41:1.35:1.33:1.28	21900000	42400000	57600000	0.52:1.00:1.36	71851	Blastochloridaceae	Blastochloris	Acetyl-coenzyme A synthetase OS=Blastochloris viridis OX=1079 GN=acsA_4 PE=3 SV=1
4467	65251	tr|A0A4Y9PFV8|A0A4Y9PFV8_9BRAD	20.42	8	3	2	178000	129000	4350000	3990000	509000	222000	2050000	0	60300000	60900000	55800000	51400000	0.35:0.25:8.56:7.85:1.00:0.44:4.02:0:64.00:64.00:64.00:64.00	2160000	925000	57100000	2.34:1.00:61.72	36968	Bradyrhizobiaceae	Bradyrhizobium	Ketol-acid reductoisomerase (NADP(+)) OS=Bradyrhizobium sp. CNPSo 3426 OX=2560054 GN=ilvC PE=3 SV=1
1193	21246	tr|A0A447CPQ4|A0A447CPQ4_9RHIZ	49.67	52	10	10	6190000	7230000	6430000	6260000	354000	1790000	2760000	2210000	59900000	76600000	54400000	56000000	17.51:20.45:18.20:17.70:1.00:5.07:7.81:6.26:64.00:64.00:64.00:64.00	8140000	2000000	63300000	4.07:1.00:31.68	28124	Hyphomicrobiaceae	Rhodoplanes	Reaction center protein H chain OS=Rhodoplanes piscinae OX=444923 GN=puhA PE=4 SV=1
356	20818	tr|A0A318TK87|A0A318TK87_9BRAD	53.44	39	15	11	16400000	14500000	12700000	14000000	6210000	6280000	10800000	8750000	59700000	67400000	59300000	73500000	2.64:2.33:2.05:2.25:1.00:1.01:1.73:1.41:9.61:10.86:9.55:11.84	14600000	8000000	68600000	1.82:1.00:8.57	50493	Bradyrhizobiaceae	Rhodopseudomonas	Aldehyde dehydrogenase (NAD+) OS=Rhodopseudomonas faecalis OX=99655 GN=BJ122_10138 PE=4 SV=1
1382	22198	tr|A0A318TFT8|A0A318TFT8_9BRAD	44.88	19	7	7	1670000	1880000	680000	560000	2000000	2530000	1110000	1300000	59500000	50900000	38400000	46500000	0.83:0.94:0.34:0.28:1.00:1.26:0.55:0.65:29.67:25.40:19.15:23.20	1360000	1840000	48800000	0.74:1.00:26.47	66532	Bradyrhizobiaceae	Rhodopseudomonas	Amidohydro_3 domain-containing protein OS=Rhodopseudomonas faecalis OX=99655 GN=BJ122_10627 PE=4 SV=1
393	20654	tr|A0A318TQS7|A0A318TQS7_9BRAD	30.78	53	14	9	28200000	34300000	31300000	35200000	50100000	62500000	51700000	54000000	59300000	64500000	47600000	49200000	0.56:0.68:0.62:0.70:1.00:1.25:1.03:1.08:1.18:1.29:0.95:0.98	34200000	55200000	56700000	0.62:1.00:1.03	34190	Bradyrhizobiaceae	Rhodopseudomonas	Chitooligosaccharide deacetylase OS=Rhodopseudomonas faecalis OX=99655 GN=BJ122_101127 PE=3 SV=1
192	9314	tr|A0A5M6I1F5|A0A5M6I1F5_9RHIZ	34.92	57	19	11	12800000	19100000	15800000	11600000	26000000	16200000	30400000	37200000	58000000	51600000	65000000	62500000	0.49:0.73:0.61:0.45:1.00:0.62:1.17:1.43:2.23:1.98:2.50:2.40	14800000	29600000	59300000	0.50:1.00:2.00	44791	Blastochloridaceae	Blastochloris	Enolase OS=Blastochloris sulfoviridis OX=50712 GN=eno PE=3 SV=1
843	21243	tr|A0A318TL56|A0A318TL56_9BRAD	47	26	11	7	7240000	7850000	1580000	2820000	3610000	4230000	2980000	2560000	57800000	52000000	51100000	46400000	2.01:2.17:0.44:0.78:1.00:1.17:0.83:0.71:16.00:14.40:14.16:12.84	5800000	3450000	51800000	1.68:1.00:15.01	63910	Bradyrhizobiaceae	Rhodopseudomonas	Uncharacterized protein OS=Rhodopseudomonas faecalis OX=99655 GN=BJ122_103225 PE=3 SV=1
1701	51581	Q134T2|RL2_RHOPS	44.95	29	7	2	7930000	5460000	5040000	3150000	6590000	4920000	4380000	3700000	57600000	52000000	35100000	43200000	1.20:0.83:0.76:0.48:1.00:0.75:0.66:0.56:8.73:7.89:5.32:6.55	5390000	4900000	47000000	1.10:1.00:9.59	30619	Bradyrhizobiaceae	Rhodopseudomonas	50S ribosomal protein L2 OS=Rhodopseudomonas palustris (strain BisB5) OX=316057 GN=rplB PE=3 SV=1
589	21533	tr|Q07I56|Q07I56_RHOP5	37.76	18	12	7	1270000	1720000	150000	39000	528000	365000	1070000	1110000	57500000	61200000	44700000	40700000	2.41:3.25:0.28:0.07:1.00:0.69:2.03:2.10:64.00:64.00:64.00:64.00	1330000	1540000	51000000	0.86:1.00:33.19	69217	Bradyrhizobiaceae	Rhodopseudomonas	AMP-dependent synthetase and ligase OS=Rhodopseudomonas palustris (strain BisA53) OX=316055 GN=RPE_4455 PE=3 SV=1
4128	55140	tr|A0A533J7E5|A0A533J7E5_9BRAD	44.22	53	4	4	22000000	15500000	17100000	18300000	15900000	14600000	12800000	14500000	57400000	58500000	49200000	42900000	1.39:0.98:1.08:1.15:1.00:0.92:0.81:0.92:3.62:3.69:3.10:2.71	18500000	14500000	52100000	1.28:1.00:3.59	9529	Bradyrhizobiaceae	0	Aryl-sulfate sulfotransferase OS=Bradyrhizobium icense OX=1274631 GN=DI543_06935 PE=4 SV=1 Predicted DNA-binding protein contains Ribbon-helix-helix (RHH) domain OS=Bradyrhizobium erythrophlei OX=1437360 GN=SAMN05444169_0096 PE=4 SV=1 Aryl-sulfate sulfotransferase OS=Rhodopseudomonas palustris OX=1076 GN=D4Q52_20870 PE=4 SV=1 RHH_4 domain-containing protein OS=Nitrobacter hamburgensis (strain DSM…
3167	1384	tr|A0A4R3N059|A0A4R3N059_9GAMM	3.18	34	7	7	84300000	73400000	54700000	46800000	50300000	42100000	59200000	55400000	57200000	68900000	56000000	43100000	1.68:1.46:1.09:0.93:1.00:0.84:1.18:1.10:1.14:1.37:1.11:0.86	64800000	51800000	56300000	1.25:1.00:1.09	23201	Chromatiaceae	Thiobaca	Outer membrane protein OmpA-like peptidoglycan-associated protein OS=Thiobaca trueperi OX=127458 GN=EDC35_104236 PE=4 SV=1
3389	25321	tr|A0A5M6HQG3|A0A5M6HQG3_9RHIZ	32.19	28	4	4	5500000	809000	661000	362000	8410000	8320000	8730000	8670000	57200000	32500000	55700000	53100000	0.65:0.10:0.08:0.04:1.00:0.99:1.04:1.03:6.80:3.87:6.62:6.31	2030000	8530000	51600000	0.24:1.00:6.05	21511	Blastochloridaceae	Blastochloris	2-dehydro-3-deoxy-6-phosphogalactonate aldolase OS=Blastochloris sulfoviridis OX=50712 GN=F1193_14205 PE=3 SV=1
396	10961	tr|A0A348G4C9|A0A348G4C9_9RHIZ	50.57	34	15	7	9160000	8330000	6770000	7280000	39800000	26000000	21100000	25200000	57100000	57500000	46300000	67800000	0.23:0.21:0.17:0.18:1.00:0.65:0.53:0.63:1.43:1.44:1.16:1.70	7890000	28000000	57200000	0.28:1.00:2.04	66225	Blastochloridaceae	Blastochloris	Succinate dehydrogenase flavoprotein subunit OS=Blastochloris tepida OX=2233851 GN=sdhA PE=3 SV=1
2467	25467	tr|A0A318TTZ6|A0A318TTZ6_9BRAD	45.28	61	5	5	3820000	5300000	7290000	6000000	7140000	9660000	10000000	13500000	57100000	54700000	62900000	67300000	0.54:0.74:1.02:0.84:1.00:1.35:1.40:1.89:8.00:7.67:8.81:9.44	5910000	10400000	64100000	0.57:1.00:6.16	15003	Bradyrhizobiaceae	Rhodopseudomonas	Uncharacterized protein (DUF2147 family) OS=Rhodopseudomonas faecalis OX=99655 GN=BJ122_10834 PE=4 SV=1
347	2907	tr|A0A0H5B9E4|A0A0H5B9E4_BLAVI	32.14	26	13	6	2250000	1700000	79000	405000	9660000	11200000	15100000	16200000	56900000	54600000	55500000	57100000	0.23:0.18:0.02:0.04:1.00:1.16:1.56:1.68:5.89:5.66:5.75:5.91	1530000	13100000	56000000	0.12:1.00:4.29	69971	Blastochloridaceae	Blastochloris	Acetyl-coenzyme A synthetase OS=Blastochloris viridis OX=1079 GN=acs PE=3 SV=1
4892	36251	tr|W3RLI7|W3RLI7_9BRAD	52.01	17	3	3	3980000	3690000	2000000	2500000	1980000	3290000	3340000	3500000	56700000	66100000	54400000	46400000	2.01:1.87:1.01:1.26:1.00:1.67:1.69:1.77:28.67:33.43:27.50:23.46	3040000	3030000	55900000	1.01:1.00:18.46	17328	Bradyrhizobiaceae	Afipia	Ferric uptake regulation protein OS=Afipia sp. P52-10 OX=1429916 GN=fur PE=3 SV=1
832	50540	tr|A0A2T4J5X1|A0A2T4J5X1_RHOBL	23.13	19	9	7	33100000	33000000	34100000	34300000	15700000	9800000	25500000	20000000	56000000	66800000	50400000	73600000	2.10:2.10:2.16:2.18:1.00:0.62:1.62:1.27:3.56:4.24:3.20:4.67	33600000	17800000	61700000	1.89:1.00:3.47	61422	Rhodobacteraceae	Rhodobacter	Peptide ABC transporter OS=Rhodobacter blasticus DSM 2131 OX=1188250 GN=C5F44_14490 PE=3 SV=1
1165	21013	tr|A0A318TTB8|A0A318TTB8_9BRAD	59.46	36	9	9	1470000	1600000	1700000	1700000	317000	426000	1850000	770000	55800000	59000000	42100000	51500000	4.65:5.04:5.35:5.37:1.00:1.34:5.85:2.43:64.00:64.00:64.00:64.00	1620000	1010000	52100000	1.60:1.00:51.39	35777	Bradyrhizobiaceae	Rhodopseudomonas	RND family efflux transporter MFP subunit OS=Rhodopseudomonas faecalis OX=99655 GN=BJ122_10930 PE=3 SV=1
1011	50878	tr|A0A2T4JBF3|A0A2T4JBF3_RHOBL	22.37	36	10	10	29300000	24100000	41700000	46500000	14100000	12100000	20000000	24600000	55200000	54000000	47300000	40700000	2.08:1.71:2.96:3.31:1.00:0.86:1.42:1.75:3.93:3.84:3.37:2.90	40300000	17900000	49300000	2.25:1.00:2.76	51417	Rhodobacteraceae	Rhodobacter	Uncharacterized protein OS=Rhodobacter blasticus DSM 2131 OX=1188250 GN=C5F44_05325 PE=4 SV=1
2946	60291	tr|A0A1H3ZBU7|A0A1H3ZBU7_9RHOB	28.41	11	3	3	16200000	10800000	9960000	9340000	18800000	16600000	17100000	13200000	54800000	59300000	42300000	31800000	0.86:0.57:0.53:0.50:1.00:0.89:0.91:0.70:2.92:3.15:2.25:1.69	11600000	16400000	47100000	0.70:1.00:2.86	23739	Rhodobacteraceae	Rubrimonas	30S ribosomal protein S4 OS=Rubrimonas cliftonensis OX=89524 GN=rpsD PE=3 SV=1
451	20692	tr|A0A318THL5|A0A318THL5_9BRAD	42.5	33	14	11	11900000	13200000	8710000	6420000	6820000	7020000	11000000	9780000	54200000	66600000	59800000	64100000	1.74:1.94:1.28:0.94:1.00:1.03:1.61:1.43:7.94:9.76:8.76:9.40	10100000	8650000	61900000	1.16:1.00:7.16	52159	Bradyrhizobiaceae	Rhodopseudomonas	Probable cytosol aminopeptidase OS=Rhodopseudomonas faecalis OX=99655 GN=pepA PE=3 SV=1
3248	25505	tr|A0A318TEY1|A0A318TEY1_9BRAD	46.84	34	4	3	11000000	5540000	4020000	5990000	2250000	2270000	3500000	3550000	54200000	57200000	33500000	46200000	4.89:2.46:1.79:2.67:1.00:1.01:1.56:1.58:24.10:25.45:14.91:20.55	6790000	3250000	48400000	2.09:1.00:14.91	20757	Bradyrhizobiaceae	Rhodopseudomonas	Elongation factor P OS=Rhodopseudomonas faecalis OX=99655 GN=efp PE=3 SV=1
1401	2960	tr|A0A318TER6|A0A318TER6_9BRAD	34.22	45	6	6	21600000	22400000	18000000	17100000	29700000	28200000	19900000	22400000	53900000	60800000	46100000	43200000	0.73:0.75:0.61:0.58:1.00:0.95:0.67:0.75:1.82:2.04:1.55:1.45	19800000	25000000	51000000	0.79:1.00:2.04	18261	Bradyrhizobiaceae	Rhodopseudomonas	Microcystin-dependent protein OS=Rhodopseudomonas faecalis OX=99655 GN=BJ122_10841 PE=4 SV=1
101	1313	tr|Q6N268|Q6N268_RHOPA	53.78	46	15	2	6290000	7240000	5650000	5310000	3460000	6890000	6050000	7450000	53500000	45500000	51600000	50600000	1.82:2.09:1.63:1.54:1.00:1.99:1.75:2.15:15.48:13.16:14.92:14.64	6130000	5960000	50300000	1.03:1.00:8.44	39220	Bradyrhizobiaceae	Rhodopseudomonas	Nicotinamide nucleotide transhydrogenase subunit alpha1 OS=Rhodopseudomonas palustris (strain ATCC BAA-98 / CGA009) OX=258594 GN=pntA alpha PE=3 SV=1
2784	10193	tr|A0A5M6HZZ0|A0A5M6HZZ0_9RHIZ	35.31	32	5	4	10600000	5060000	4920000	6700000	26200000	30100000	41300000	26600000	53500000	64600000	55200000	52800000	0.41:0.19:0.19:0.26:1.00:1.15:1.58:1.02:2.04:2.46:2.10:2.02	6830000	31100000	56500000	0.22:1.00:1.82	16972	Blastochloridaceae	Blastochloris	Glutathione-dependent peroxiredoxin OS=Blastochloris sulfoviridis OX=50712 GN=F1193_09675 PE=3 SV=1
2709	24850	tr|A0A327L221|A0A327L221_9RHIZ	46.22	13	6	2	2310000	2650000	1450000	3450000	1640000	2060000	3170000	1990000	53200000	51600000	56400000	50800000	1.40:1.61:0.88:2.10:1.00:1.25:1.93:1.21:32.35:31.38:34.33:30.93	2960000	2500000	53000000	1.19:1.00:21.24	55489	Hyphomicrobiaceae	Rhodoplanes	Methylmalonyl-CoA carboxyltransferase OS=Rhodoplanes roseus OX=29409 GN=CH341_05390 PE=4 SV=1
441	20784	tr|A0A5M6I2Z1|A0A5M6I2Z1_9RHIZ	39.87	24	14	7	9020000	8670000	5590000	3970000	21700000	20600000	25500000	22000000	53100000	63900000	65800000	76600000	0.41:0.40:0.26:0.18:1.00:0.95:1.17:1.01:2.44:2.94:3.02:3.52	6880000	22500000	66300000	0.31:1.00:2.94	73706	Blastochloridaceae	Blastochloris	Elongation factor G OS=Blastochloris sulfoviridis OX=50712 GN=F1193_05250 PE=3 SV=1
4419	7016	tr|A0A318TMN2|A0A318TMN2_9BRAD	38.71	24	3	3	24800000	25000000	17500000	15700000	20700000	20200000	16700000	22300000	53000000	46500000	49700000	48100000	1.20:1.21:0.85:0.76:1.00:0.98:0.81:1.08:2.56:2.25:2.40:2.32	21100000	20000000	49300000	1.06:1.00:2.47	18357	Bradyrhizobiaceae	Rhodopseudomonas	Microcystin-dependent protein OS=Rhodopseudomonas faecalis OX=99655 GN=BJ122_10840 PE=4 SV=1
2349	23726	tr|A0A348G189|A0A348G189_9RHIZ	62.64	37	5	5	3340000	3270000	3170000	2660000	6080000	4820000	17500000	17500000	52800000	41800000	51400000	45000000	0.55:0.54:0.52:0.44:1.00:0.79:2.87:2.87:8.68:6.87:8.45:7.40	3220000	16000000	47700000	0.20:1.00:2.99	26566	Blastochloridaceae	Blastochloris	Phosphatidylserine decarboxylase proenzyme OS=Blastochloris tepida OX=2233851 GN=psd PE=3 SV=1
331	20602	tr|A0A318TFC6|A0A318TFC6_9BRAD	12.75	40	18	14	45900000	60000000	42000000	40800000	34100000	32300000	33000000	41200000	52700000	44800000	57300000	36800000	1.35:1.76:1.23:1.20:1.00:0.95:0.97:1.21:1.54:1.31:1.68:1.08	47200000	35200000	47900000	1.34:1.00:1.36	60988	Bradyrhizobiaceae	Rhodopseudomonas	HemY protein OS=Rhodopseudomonas faecalis OX=99655 GN=BJ122_11620 PE=4 SV=1
1695	22995	tr|A0A318TK80|A0A318TK80_9BRAD	41.2	19	6	6	11100000	10000000	6670000	6530000	3200000	3320000	6380000	5200000	52100000	59700000	52600000	50500000	3.47:3.13:2.08:2.04:1.00:1.04:2.00:1.63:16.29:18.66:16.45:15.77	8570000	4530000	53700000	1.89:1.00:11.87	39340	Bradyrhizobiaceae	Rhodopseudomonas	Uncharacterized protein OS=Rhodopseudomonas faecalis OX=99655 GN=BJ122_102352 PE=4 SV=1
4095	26688	tr|A0A348G4S7|A0A348G4S7_9RHIZ	69.33	28	4	3	3840000	3830000	3170000	3170000	22100000	22100000	19800000	22400000	52000000	45400000	46600000	45400000	0.17:0.17:0.14:0.14:1.00:1.00:0.89:1.01:2.35:2.05:2.11:2.05	3510000	21600000	47400000	0.16:1.00:2.19	17462	Blastochloridaceae	Blastochloris	Protein-export protein SecB OS=Blastochloris tepida OX=2233851 GN=secB PE=3 SV=1
1005	4240	tr|A0A5M6HZ54|A0A5M6HZ54_9RHIZ	35.92	23	11	3	612000	974000	2960000	2770000	1880000	2210000	4880000	1360000	51800000	60800000	40400000	34300000	0.33:0.52:1.57:1.47:1.00:1.18:2.59:0.72:27.51:32.29:21.44:18.21	1940000	5160000	46800000	0.38:1.00:9.07	69997	Blastochloridaceae	Blastochloris	Propionyl-CoA synthetase OS=Blastochloris sulfoviridis OX=50712 GN=F1193_09655 PE=3 SV=1
197	20710	tr|A0A318T8L6|A0A318T8L6_9BRAD	40.96	39	17	7	5210000	4880000	4550000	2970000	5980000	5450000	1810000	2060000	51500000	47100000	47800000	52900000	0.87:0.82:0.76:0.50:1.00:0.91:0.30:0.34:8.60:7.88:8.00:8.84	4400000	3920000	49800000	1.12:1.00:12.72	59640	Bradyrhizobiaceae	Rhodopseudomonas	Transcription termination/antitermination protein NusA OS=Rhodopseudomonas faecalis OX=99655 GN=nusA PE=3 SV=1
1365	21763	tr|Q07VP7|Q07VP7_RHOP5	31.22	18	10	5	5020000	5270000	1920000	2760000	2220000	2220000	42400000	2780000	51500000	57200000	49300000	68800000	2.26:2.37:0.87:1.24:1.00:1.00:19.05:1.25:23.14:25.73:22.17:30.95	4700000	12400000	74400000	0.38:1.00:6.00	56327	Bradyrhizobiaceae	Rhodopseudomonas	Bifunctional purine biosynthesis protein PurH OS=Rhodopseudomonas palustris (strain BisA53) OX=316055 GN=purH PE=3 SV=1
7	48	tr|A0A4V2V0U0|A0A4V2V0U0_9GAMM	34.82	32	32	16	73000000	72300000	75900000	74300000	107000000	109000000	93900000	106000000	50800000	39800000	43600000	39000000	0.68:0.68:0.71:0.69:1.00:1.02:0.88:0.99:0.47:0.37:0.41:0.36	73900000	104000000	43400000	0.71:1.00:0.42	136465	Chromatiaceae	Thiobaca	Magnesium chelatase OS=Thiobaca trueperi OX=127458 GN=EDC35_11336 PE=3 SV=1
3894	25549	tr|A0A318TL45|A0A318TL45_9BRAD	22.58	13	4	4	5720000	8690000	7760000	7180000	6120000	5520000	1630000	1750000	50800000	54800000	21400000	24400000	0.94:1.42:1.27:1.17:1.00:0.90:0.27:0.29:8.31:8.96:3.51:3.98	8260000	6450000	37800000	1.28:1.00:5.87	47648	Bradyrhizobiaceae	Rhodopseudomonas	Outer membrane immunogenic protein OS=Rhodopseudomonas faecalis OX=99655 GN=BJ122_103212 PE=4 SV=1
1408	23185	tr|E6VM20|E6VM20_RHOPX	45.57	8	8	8	4880000	4580000	5380000	4470000	5300000	5330000	4420000	4690000	50300000	53700000	32600000	34900000	0.92:0.86:1.01:0.84:1.00:1.01:0.83:0.88:9.49:10.13:6.15:6.58	4830000	4940000	42900000	0.98:1.00:8.69	91926	Bradyrhizobiaceae	Rhodopseudomonas	DD-transpeptidase OS=Rhodopseudomonas palustris (strain DX-1) OX=652103 GN=Rpdx1_3059 PE=3 SV=1
611	20864	tr|A0A0H5BIE9|A0A0H5BIE9_BLAVI	46.44	19	10	5	1700000	1360000	906000	1020000	22500000	20000000	23500000	21300000	50200000	42800000	33900000	38500000	0.08:0.06:0.04:0.05:1.00:0.89:1.04:0.94:2.23:1.90:1.51:1.71	1780000	21800000	41300000	0.08:1.00:1.90	74337	Blastochloridaceae	Blastochloris	Propionyl-CoA carboxylase OS=Blastochloris viridis OX=1079 GN=accA1_1 PE=4 SV=1
4936	64595	tr|A0A318TJ47|A0A318TJ47_9BRAD	43.98	11	3	3	4580000	4510000	2710000	2410000	3460000	2980000	1840000	1880000	50200000	52000000	53400000	46800000	1.32:1.31:0.78:0.70:1.00:0.86:0.53:0.55:14.53:15.06:15.46:13.53	3550000	2540000	50600000	1.40:1.00:19.93	24115	Bradyrhizobiaceae	Rhodopseudomonas	Uncharacterized protein OS=Rhodopseudomonas faecalis OX=99655 GN=BJ122_1165 PE=4 SV=1
1680	27492	tr|A0A318TLD3|A0A318TLD3_9BRAD	27.05	33	6	6	33000000	36700000	32400000	32100000	16700000	15500000	31200000	28900000	49800000	49200000	42300000	46100000	1.98:2.20:1.93:1.92:1.00:0.93:1.87:1.73:2.98:2.94:2.53:2.76	33600000	23300000	48100000	1.44:1.00:2.07	16341	Bradyrhizobiaceae	Rhodopseudomonas	Peptidyl-prolyl cis-trans isomerase OS=Rhodopseudomonas faecalis OX=99655 GN=BJ122_101289 PE=3 SV=1
49	2864	tr|A0A7C9VGG8|A0A7C9VGG8_9BRAD	42.6	31	28	2	19000000	17900000	13000000	15200000	14500000	14000000	10300000	11000000	49600000	43500000	48600000	45900000	1.31:1.24:0.89:1.04:1.00:0.96:0.71:0.76:3.42:3.00:3.35:3.16	16300000	12500000	46900000	1.30:1.00:3.74	114245	Bradyrhizobiaceae	Afipia	DNA-directed RNA polymerase subunit beta (Fragment) OS=Candidatus Afipia apatlaquensis OX=2712852 GN=rpoB PE=3 SV=1
1200	51952	tr|A0A0A0HPU1|A0A0A0HPU1_9RHOB	41.88	19	6	3	3730000	5330000	5850000	3380000	1490000	146000	181000	37300	49600000	60200000	45000000	46900000	2.50:3.58:3.92:2.27:1.00:0.10:0.12:0.03:33.33:40.38:30.23:31.50	4780000	982000	50400000	4.87:1.00:51.34	58539	Roseobacteraceae	Roseovarius	ABC-type dipeptide transport system periplasmic component OS=Roseovarius mucosus DSM 17069 OX=1288298 GN=rosmuc_00764 PE=3 SV=1
3453	24111	tr|A0A318TI76|A0A318TI76_9BRAD	55.59	27	5	4	2470000	2350000	1370000	2110000	2530000	2340000	3960000	2610000	49000000	33400000	42600000	42100000	0.98:0.93:0.54:0.83:1.00:0.92:1.57:1.03:19.33:13.20:16.82:16.61	2090000	3450000	44300000	0.61:1.00:12.83	26896	Bradyrhizobiaceae	Rhodopseudomonas	Ribonuclease BN (tRNA processing enzyme) OS=Rhodopseudomonas faecalis OX=99655 GN=BJ122_103217 PE=4 SV=1
1392	21891	tr|A0A5M6HTJ6|A0A5M6HTJ6_9RHIZ	6.98	31	8	8	45700000	42300000	30000000	31500000	26400000	22100000	49200000	46400000	48800000	52700000	49600000	37800000	1.73:1.60:1.14:1.19:1.00:0.84:1.87:1.76:1.85:2.00:1.88:1.43	37400000	36900000	47200000	1.01:1.00:1.28	36566	Blastochloridaceae	Blastochloris	Amino acid ABC transporter substrate-binding protein OS=Blastochloris sulfoviridis OX=50712 GN=F1193_12785 PE=4 SV=1
971	51351	tr|A0A099GFV9|A0A099GFV9_9RHOB	75.04	18	10	2	3860000	4450000	4320000	4160000	5380000	5970000	3690000	4070000	48600000	49300000	49400000	44200000	0.72:0.83:0.80:0.77:1.00:1.11:0.69:0.76:9.04:9.17:9.18:8.21	4200000	4770000	47900000	0.88:1.00:10.03	55091	Rhodobacteraceae	Paracoccus	ATP synthase subunit alpha OS=Paracoccus sanguinis OX=1545044 GN=atpA PE=3 SV=1
1137	21888	tr|A0A318T8E4|A0A318T8E4_9BRAD	45.83	28	9	6	5220000	4840000	2480000	2930000	3100000	1990000	3180000	1520000	48600000	54400000	50300000	96000000	1.69:1.56:0.80:0.94:1.00:0.64:1.03:0.49:15.70:17.56:16.23:31.00	3860000	2690000	62300000	1.44:1.00:23.21	51788	Bradyrhizobiaceae	Rhodopseudomonas	Periplasmic serine endoprotease DegP-like OS=Rhodopseudomonas faecalis OX=99655 GN=BJ122_1237 PE=3 SV=1
3988	26263	tr|A0A318TSG7|A0A318TSG7_9BRAD	35.93	34	4	3	2230000	3600000	2340000	424000	2190000	1430000	590000	827000	48300000	43800000	27000000	49100000	1.02:1.64:1.07:0.19:1.00:0.65:0.27:0.38:22.02:19.95:12.29:22.36	2870000	1330000	42000000	2.15:1.00:31.53	24396	Bradyrhizobiaceae	Rhodopseudomonas	Ribulose-phosphate 3-epimerase OS=Rhodopseudomonas faecalis OX=99655 GN=rpe PE=3 SV=1
3314	27287	tr|A0A318TIK1|A0A318TIK1_9BRAD	43.43	33	4	4	1050000	1680000	976000	661000	1320000	834000	2320000	2740000	48100000	42000000	41500000	37000000	0.80:1.28:0.74:0.50:1.00:0.63:1.76:2.08:36.48:31.82:31.42:28.05	1430000	1900000	42300000	0.75:1.00:22.24	27086	Bradyrhizobiaceae	Rhodopseudomonas	Carbonic anhydrase OS=Rhodopseudomonas faecalis OX=99655 GN=BJ122_103221 PE=3 SV=1
4768	34992	tr|A0A318TMG1|A0A318TMG1_9BRAD	41.41	14	2	2	58300	1020000	329000	96700	406000	425000	589000	1010000	48000000	47100000	51100000	44500000	0.14:2.50:0.81:0.24:1.00:1.05:1.45:2.49:64.00:64.00:64.00:64.00	375000	872000	47700000	0.43:1.00:54.73	17537	Bradyrhizobiaceae	Rhodopseudomonas	Uncharacterized protein OS=Rhodopseudomonas faecalis OX=99655 GN=BJ122_1403 PE=4 SV=1
602	21449	tr|A0A318TGF1|A0A318TGF1_9BRAD	36.09	42	10	7	22300000	23600000	15100000	16100000	5260000	5670000	11200000	9020000	47700000	67800000	44700000	52400000	4.24:4.48:2.86:3.06:1.00:1.08:2.13:1.71:9.06:12.90:8.50:9.97	19500000	9180000	53200000	2.12:1.00:5.79	31757	Bradyrhizobiaceae	Rhodopseudomonas	4-hydroxy-tetrahydrodipicolinate synthase OS=Rhodopseudomonas faecalis OX=99655 GN=dapA PE=3 SV=1
1182	22317	tr|A0A5M6HN14|A0A5M6HN14_9RHIZ	2.46	19	11	4	3240000	7890000	12100000	10600000	3480000	5750000	33200000	31500000	47700000	43600000	5820000	5140000	0.93:2.26:3.48:3.05:1.00:1.65:9.53:9.04:13.69:12.52:1.67:1.47	8800000	25500000	26000000	0.34:1.00:1.02	56827	Blastochloridaceae	Blastochloris	D-3-phosphoglycerate dehydrogenase OS=Blastochloris sulfoviridis OX=50712 GN=F1193_14635 PE=3 SV=1
228	20612	tr|A0A5M6I578|A0A5M6I578_9RHIZ	60.81	30	15	9	4940000	6090000	3030000	3420000	12300000	11900000	11200000	12000000	47600000	41900000	47100000	43700000	0.40:0.50:0.25:0.28:1.00:0.97:0.91:0.97:3.87:3.40:3.83:3.55	4720000	12600000	45100000	0.38:1.00:3.58	59726	Blastochloridaceae	Blastochloris	Acyl-CoA dehydrogenase OS=Blastochloris sulfoviridis OX=50712 GN=F1193_01575 PE=3 SV=1
4156	25346	tr|A0A318TA91|A0A318TA91_9BRAD	47.04	28	4	3	2430000	1200000	498000	500000	2050000	1860000	3180000	2760000	47400000	42000000	36500000	36400000	1.18:0.58:0.24:0.24:1.00:0.91:1.55:1.35:23.11:20.49:17.81:17.75	1150000	2460000	40600000	0.47:1.00:16.48	16181	Bradyrhizobiaceae	Rhodopseudomonas	CBS domain protein OS=Rhodopseudomonas faecalis OX=99655 GN=BJ122_11562 PE=4 SV=1
1205	22243	tr|A0A5M6I5R6|A0A5M6I5R6_9RHIZ	54.63	33	10	8	3920000	3860000	2850000	2530000	13400000	13900000	17000000	16300000	47100000	50700000	46000000	42700000	0.29:0.29:0.21:0.19:1.00:1.04:1.26:1.21:3.51:3.78:3.43:3.18	3320000	15100000	46600000	0.22:1.00:3.08	33226	Blastochloridaceae	Blastochloris	Protein HflC OS=Blastochloris sulfoviridis OX=50712 GN=F1193_02940 PE=3 SV=1
1957	22460	tr|A0A5M6HN07|A0A5M6HN07_9RHIZ	50.27	14	8	8	352000	820000	380000	315000	11200000	11000000	8090000	9100000	46600000	49600000	51700000	44600000	0.03:0.07:0.03:0.03:1.00:0.99:0.72:0.81:4.17:4.44:4.63:4.00	684000	9850000	48100000	0.07:1.00:4.89	59657	Blastochloridaceae	Blastochloris	Mucoidy inhibitor MuiA family protein OS=Blastochloris sulfoviridis OX=50712 GN=F1193_14650 PE=4 SV=1
2005	51607	tr|A0A1N7M0H8|A0A1N7M0H8_9RHOB	2.94	16	9	3	33500000	36600000	32900000	35200000	31900000	30400000	48700000	45000000	46600000	24500000	20300000	28600000	1.05:1.15:1.03:1.11:1.00:0.95:1.53:1.41:1.46:0.77:0.64:0.90	34800000	39000000	48900000	0.89:1.00:1.25	53077	Rhodobacteraceae	Bieblia	Ribulose bisphosphate carboxylase large chain OS=Rhodobacter vinaykumarii OX=407234 GN=cbbL PE=3 SV=1
1998	22913	tr|A0A318T806|A0A318T806_9BRAD	68.89	44	7	7	3040000	3710000	3430000	3820000	2460000	2500000	2450000	2340000	46500000	54100000	53800000	56500000	1.24:1.51:1.39:1.55:1.00:1.02:0.99:0.95:18.90:22.00:21.85:22.96	3610000	2560000	52700000	1.41:1.00:20.59	19375	Bradyrhizobiaceae	Rhodopseudomonas	ATP synthase subunit delta OS=Rhodopseudomonas faecalis OX=99655 GN=atpH PE=3 SV=1
2894	9954	tr|A0A7W7Z802|A0A7W7Z802_9BRAD	32.12	53	5	5	7030000	9140000	4560000	4130000	1980000	2370000	903000	83800	46500000	52800000	57700000	51000000	3.55:4.61:2.30:2.08:1.00:1.19:0.46:0.04:23.46:26.61:29.08:25.75	6410000	1390000	52000000	4.61:1.00:37.35	12067	0	0	Host factor-I protein OS=Rhodopseudomonas rhenobacensis OX=87461 GN=HNR60_004293 PE=4 SV=1 RNA-binding protein Hfq OS=Rhizobium tropici OX=398 GN=hfq PE=3 SV=1
13	20516	tr|A0A318TCI9|A0A318TCI9_9BRAD	41.89	23	33	20	5210000	5290000	2270000	1510000	3020000	2310000	4560000	2770000	45900000	55100000	46600000	47200000	1.72:1.75:0.75:0.50:1.00:0.76:1.51:0.92:15.16:18.22:15.42:15.60	4670000	3520000	48700000	1.33:1.00:13.83	225199	Bradyrhizobiaceae	Rhodopseudomonas	Apolipoprotein A1/A4/E domain-containing protein OS=Rhodopseudomonas faecalis OX=99655 GN=BJ122_12023 PE=4 SV=1
1098	8019	tr|A0A4R3MU13|A0A4R3MU13_9GAMM	29.34	16	9	9	18600000	8490000	11400000	10500000	33100000	36500000	33000000	32400000	45900000	47000000	39400000	42400000	0.56:0.26:0.34:0.32:1.00:1.10:1.00:0.98:1.39:1.42:1.19:1.28	12600000	33900000	44600000	0.37:1.00:1.32	69550	Chromatiaceae	Thiobaca	NAD(P)-dependent iron-only hydrogenase catalytic subunit OS=Thiobaca trueperi OX=127458 GN=EDC35_11013 PE=4 SV=1
1423	21792	tr|Q6NAJ0|Q6NAJ0_RHOPA	34.99	28	7	4	6280000	6250000	3850000	2720000	3240000	2440000	3060000	3530000	45700000	19200000	27000000	30500000	1.94:1.93:1.19:0.84:1.00:0.75:0.95:1.09:14.10:5.92:8.35:9.42	4840000	3330000	36700000	1.45:1.00:11.01	27613	Bradyrhizobiaceae	Rhodopseudomonas	Short-chain dehydrogenase OS=Rhodopseudomonas palustris (strain ATCC BAA-98 / CGA009) OX=258594 GN=fixR1 PE=4 SV=1
16	20556	Q6N4S0|RPOC_RHOPA	50.69	26	34	2	6520000	6270000	4280000	3430000	2370000	2980000	4110000	2760000	45500000	46700000	41000000	34500000	2.76:2.65:1.81:1.45:1.00:1.26:1.74:1.17:19.23:19.75:17.33:14.61	5310000	3060000	42000000	1.73:1.00:13.72	156055	Bradyrhizobiaceae	Rhodopseudomonas	DNA-directed RNA polymerase subunit beta' OS=Rhodopseudomonas palustris (strain ATCC BAA-98 / CGA009) OX=258594 GN=rpoC PE=3 SV=1
4183	28653	tr|A0A348G0L2|A0A348G0L2_9RHIZ	33.67	36	4	4	16600000	15700000	11200000	11700000	19200000	13300000	24300000	22700000	45100000	46300000	38900000	36700000	0.86:0.82:0.58:0.61:1.00:0.69:1.26:1.18:2.34:2.41:2.02:1.91	14900000	19900000	41700000	0.75:1.00:2.10	10292	Blastochloridaceae	Blastochloris	30S ribosomal protein S19 OS=Blastochloris tepida OX=2233851 GN=rpsS PE=3 SV=1
3318	28937	tr|A0A318TBF1|A0A318TBF1_9BRAD	34.85	54	5	5	3930000	1900000	4410000	4710000	2900000	2720000	8160000	7860000	44900000	39800000	108000000	68300000	1.36:0.66:1.52:1.63:1.00:0.94:2.82:2.71:15.51:13.75:37.22:23.60	4350000	7430000	86700000	0.59:1.00:11.66	12173	Bradyrhizobiaceae	Rhodopseudomonas	Sulfur compound chelating protein SoxZ OS=Rhodopseudomonas faecalis OX=99655 GN=BJ122_11645 PE=4 SV=1
3512	27189	tr|A0A318TDC7|A0A318TDC7_9BRAD	43.3	26	3	3	4080000	2750000	1560000	1310000	794000	578000	1620000	1080000	44900000	54100000	54300000	60900000	5.13:3.47:1.96:1.66:1.00:0.73:2.04:1.36:56.51:64.00:64.00:64.00	2720000	1140000	53500000	2.37:1.00:46.76	17670	Bradyrhizobiaceae	Rhodopseudomonas	ATP synthase subunit b OS=Rhodopseudomonas faecalis OX=99655 GN=atpF PE=3 SV=1
390	21166	tr|A0A7W7Z0S1|A0A7W7Z0S1_9BRAD	45.44	51	17	7	5140000	6480000	7570000	5710000	2150000	2660000	524000	6720000	44400000	47700000	48000000	51100000	2.39:3.02:3.52:2.66:1.00:1.24:0.24:3.13:20.68:22.24:22.34:23.81	7260000	3170000	47800000	2.29:1.00:15.06	33040	Bradyrhizobiaceae	Rhodopseudomonas	Phosphoribulokinase OS=Rhodopseudomonas rhenobacensis OX=87461 GN=HNR60_000643 PE=4 SV=1
5427	39625	tr|A0A318THV3|A0A318THV3_9BRAD	47.3	8	2	2	3860000	3850000	4230000	4010000	3780000	3900000	3040000	2520000	44300000	40100000	32700000	31300000	1.02:1.02:1.12:1.06:1.00:1.03:0.80:0.67:11.71:10.60:8.66:8.28	3980000	3550000	37100000	1.12:1.00:10.47	16991	Bradyrhizobiaceae	Rhodopseudomonas	Uncharacterized protein OS=Rhodopseudomonas faecalis OX=99655 GN=BJ122_10410 PE=4 SV=1
4075	25153	tr|A0A318T9D2|A0A318T9D2_9BRAD	39.18	18	4	4	9580000	9480000	6000000	10600000	2120000	4070000	1830000	1120000	43900000	47300000	53600000	48400000	4.52:4.47:2.83:5.00:1.00:1.92:0.86:0.53:20.71:22.28:25.27:22.81	9120000	2640000	48300000	3.46:1.00:18.31	27037	Bradyrhizobiaceae	Rhodopseudomonas	Uncharacterized protein OS=Rhodopseudomonas faecalis OX=99655 GN=BJ122_11955 PE=4 SV=1
24	625	tr|A0A348G0L9|A0A348G0L9_9RHIZ	36.11	61	33	8	5240000	6460000	2680000	2820000	32600000	41300000	33900000	39200000	43500000	49500000	46000000	55100000	0.16:0.20:0.08:0.09:1.00:1.26:1.04:1.20:1.33:1.52:1.41:1.69	4900000	36800000	48500000	0.13:1.00:1.32	76005	Blastochloridaceae	Blastochloris	Elongation factor G OS=Blastochloris tepida OX=2233851 GN=fusA PE=3 SV=1
2441	27941	tr|Q6N1S3|Q6N1S3_RHOPA	67.7	17	5	2	1510000	1550000	465000	537000	1130000	856000	1030000	1090000	43500000	36700000	35200000	38200000	1.33:1.37:0.41:0.47:1.00:0.76:0.91:0.96:38.41:32.40:31.04:33.69	1050000	1030000	38400000	1.03:1.00:37.43	44426	Bradyrhizobiaceae	Rhodopseudomonas	Aspartate aminotransferase A OS=Rhodopseudomonas palustris (strain ATCC BAA-98 / CGA009) OX=258594 GN=aatA PE=4 SV=1
133	1814	tr|A0A5M6I2Q4|A0A5M6I2Q4_9RHIZ	29.24	58	18	8	49400000	51000000	43600000	44100000	71600000	80200000	83200000	63600000	43300000	32000000	40400000	34600000	0.69:0.71:0.61:0.62:1.00:1.12:1.16:0.89:0.60:0.45:0.56:0.48	47700000	74700000	37800000	0.64:1.00:0.51	34134	Blastochloridaceae	Blastochloris	Malate dehydrogenase OS=Blastochloris sulfoviridis OX=50712 GN=mdh PE=3 SV=1
124	5132	tr|A0A127EZC9|A0A127EZC9_9RHIZ	67.16	23	15	3	3970000	3370000	3720000	3520000	3930000	3870000	3460000	3090000	43100000	44100000	42500000	44000000	1.01:0.86:0.95:0.90:1.00:0.99:0.88:0.79:10.96:11.22:10.81:11.21	3650000	3590000	43400000	1.02:1.00:12.10	75781	Hyphomicrobiaceae	Rhodoplanes	Elongation factor G OS=Rhodoplanes sp. Z2-YC6860 OX=674703 GN=fusA PE=3 SV=1
3379	24523	tr|A0A318TN75|A0A318TN75_9BRAD	39.37	9	4	4	547000	6330000	378000	479000	2330000	2010000	4030000	3100000	42900000	38700000	40400000	32700000	0.23:2.71:0.16:0.21:1.00:0.86:1.73:1.33:18.40:16.58:17.33:14.03	1950000	2870000	39900000	0.68:1.00:13.90	54167	Bradyrhizobiaceae	Rhodopseudomonas	Flp pilus assembly protein TadG OS=Rhodopseudomonas faecalis OX=99655 GN=BJ122_10749 PE=4 SV=1
4142	62875	tr|A0A2T0PG62|A0A2T0PG62_RHITR	72.09	23	4	3	4330000	3280000	173000	2600000	1670000	1930000	1750000	1600000	42700000	42600000	51200000	46000000	2.59:1.97:0.10:1.56:1.00:1.16:1.05:0.96:25.60:25.57:30.73:27.60	3460000	1740000	45600000	1.99:1.00:26.31	16676	0	0	Peptidyl-prolyl cis-trans isomerase OS=Rhizobium tropici OX=398 GN=NA75_1016 PE=3 SV=1 Peptidylprolyl isomerase OS=Rhodopseudomonas rhenobacensis OX=87461 GN=HNR60_004299 PE=4 SV=1
3705	26427	tr|A0A348FWJ8|A0A348FWJ8_9RHIZ	45.72	17	4	4	6750000	6990000	5200000	5500000	17400000	17300000	25200000	21200000	42500000	39900000	40100000	41000000	0.39:0.40:0.30:0.32:1.00:0.99:1.45:1.22:2.43:2.29:2.30:2.35	6110000	20300000	40900000	0.30:1.00:2.02	25178	Blastochloridaceae	Blastochloris	Uncharacterized protein OS=Blastochloris tepida OX=2233851 GN=BLTE_03660 PE=4 SV=1
1611	1037	tr|A0A2K8UDJ3|A0A2K8UDJ3_9GAMM	14.43	21	7	2	12600000	21800000	2080000	9650000	728000	1180000	12100000	14100000	42400000	39100000	43800000	39400000	17.34:29.93:2.86:13.25:1.00:1.62:16.65:19.38:58.22:53.69:60.22:54.09	18600000	12800000	41200000	1.46:1.00:3.23	30188	Chromatiaceae	Thiodictyon	50S ribosomal protein L2 OS=Candidatus Thiodictyon syntrophicum OX=1166950 GN=rplB PE=3 SV=1
5491	6703	tr|A0A318TEF8|A0A318TEF8_9BRAD	26.61	20	2	2	21400000	22300000	14500000	11000000	14200000	13700000	17600000	19800000	42300000	37900000	28300000	38400000	1.51:1.57:1.02:0.77:1.00:0.97:1.24:1.39:2.97:2.66:1.99:2.70	17300000	16300000	36700000	1.06:1.00:2.25	18379	Bradyrhizobiaceae	Rhodopseudomonas	Microcystin-dependent protein OS=Rhodopseudomonas faecalis OX=99655 GN=BJ122_10839 PE=4 SV=1
2339	22627	tr|A0A318TSJ7|A0A318TSJ7_9BRAD	38.23	22	7	6	1220000	2380000	1150000	326000	1680000	1110000	1900000	3070000	41900000	27900000	36900000	34000000	0.73:1.42:0.69:0.19:1.00:0.66:1.14:1.83:24.99:16.65:22.03:20.27	1460000	2360000	40300000	0.62:1.00:17.09	44056	Bradyrhizobiaceae	Rhodopseudomonas	3-phenylpropionate/trans-cinnamate dioxygenase ferredoxin reductase subunit OS=Rhodopseudomonas faecalis OX=99655 GN=BJ122_10240 PE=4 SV=1
513	20753	tr|A0A5M6HVZ2|A0A5M6HVZ2_9RHIZ	23.78	22	11	9	2330000	2130000	366000	2750000	28400000	28900000	15200000	17900000	41800000	42600000	39400000	35700000	0.08:0.08:0.02:0.10:1.00:1.02:0.53:0.63:1.47:1.50:1.39:1.26	1990000	26500000	39900000	0.08:1.00:1.50	64003	Blastochloridaceae	Blastochloris	Magnesium-protoporphyrin IX monomethyl ester anaerobic oxidative cyclase OS=Blastochloris sulfoviridis OX=50712 GN=bchE PE=4 SV=1
2261	22977	tr|A0A5M6HJA0|A0A5M6HJA0_9RHIZ	73.22	24	6	6	2160000	1810000	1970000	1720000	12300000	9880000	11400000	11600000	41800000	36900000	38700000	39900000	0.18:0.15:0.16:0.14:1.00:0.80:0.93:0.94:3.39:2.99:3.14:3.24	1920000	11300000	39300000	0.17:1.00:3.48	36027	Blastochloridaceae	Blastochloris	Polyprenyl synthetase family protein OS=Blastochloris sulfoviridis OX=50712 GN=F1193_16085 PE=3 SV=1
4604	28280	tr|A0A318TJ94|A0A318TJ94_9BRAD	25.59	14	3	3	805000	5350000	656000	929000	636000	6900000	1580000	2050000	41700000	33500000	32900000	31000000	1.27:8.41:1.03:1.46:1.00:10.85:2.48:3.22:64.00:52.61:51.65:48.73	1940000	3350000	34800000	0.58:1.00:10.36	27479	Bradyrhizobiaceae	Rhodopseudomonas	Enoyl-[acyl-carrier-protein] reductase [NADH] OS=Rhodopseudomonas faecalis OX=99655 GN=BJ122_103157 PE=3 SV=1
34	6354	tr|A0A318TI59|A0A318TI59_9BRAD	18.42	26	31	17	4520000	2170000	28700000	12300000	23800000	18700000	11100000	11700000	41600000	44300000	37300000	33000000	0.19:0.09:1.20:0.52:1.00:0.79:0.47:0.49:1.75:1.86:1.57:1.38	12200000	16300000	39000000	0.75:1.00:2.39	178825	Bradyrhizobiaceae	Rhodopseudomonas	Pyruvate-ferredoxin/flavodoxin oxidoreductase OS=Rhodopseudomonas faecalis OX=99655 GN=BJ122_103186 PE=3 SV=1
1197	22705	tr|A0A348G4C4|A0A348G4C4_9RHIZ	44.51	24	6	6	2630000	1400000	1600000	2260000	7620000	6280000	16100000	15400000	41600000	36100000	28400000	30100000	0.34:0.18:0.21:0.30:1.00:0.82:2.11:2.02:5.46:4.73:3.73:3.95	2080000	11300000	34100000	0.18:1.00:3.00	31403	Blastochloridaceae	Blastochloris	Citrate lyase subunit beta OS=Blastochloris tepida OX=2233851 GN=citE PE=3 SV=1
1086	7799	tr|A0A5M6HUX0|A0A5M6HUX0_9RHIZ	31.27	7	8	8	861000	1690000	5580000	1500000	4660000	5610000	8740000	9680000	41000000	32800000	33800000	33800000	0.18:0.36:1.20:0.32:1.00:1.20:1.88:2.08:8.81:7.04:7.25:7.26	3950000	7300000	43300000	0.54:1.00:5.92	186788	Blastochloridaceae	Blastochloris	Alpha-2-macroglobulin family protein OS=Blastochloris sulfoviridis OX=50712 GN=F1193_12055 PE=3 SV=1
4182	28648	tr|A0A318TQ30|A0A318TQ30_9BRAD	44.14	29	3	3	3050000	2110000	4530000	2770000	2120000	1470000	2570000	2330000	40800000	75700000	34700000	36000000	1.44:1.00:2.14:1.31:1.00:0.69:1.22:1.10:19.27:35.74:16.40:17.03	3360000	2140000	46800000	1.57:1.00:21.84	18850	Bradyrhizobiaceae	Rhodopseudomonas	Uncharacterized protein DUF3617 OS=Rhodopseudomonas faecalis OX=99655 GN=BJ122_10412 PE=4 SV=1
167	50434	tr|A0A2T4J6W2|A0A2T4J6W2_RHOBL	9.29	39	14	8	34200000	32000000	32100000	32200000	11700000	8750000	22200000	25400000	40700000	26300000	37000000	33800000	2.93:2.74:2.75:2.76:1.00:0.75:1.90:2.17:3.49:2.25:3.17:2.90	32600000	17300000	35300000	1.89:1.00:2.05	35730	Rhodobacteraceae	Rhodobacter	Amino acid ABC transporter substrate-binding protein OS=Rhodobacter blasticus DSM 2131 OX=1188250 GN=C5F44_12630 PE=4 SV=1
517	5629	tr|A0A318TJF3|A0A318TJF3_9BRAD	32.75	33	12	8	2870000	2420000	1110000	1090000	317000	1150000	940000	50600	40300000	37300000	34900000	32300000	9.03:7.63:3.49:3.42:1.00:3.63:2.96:0.16:64.00:64.00:64.00:64.00	2030000	1960000	50400000	1.03:1.00:25.64	46830	Bradyrhizobiaceae	Rhodopseudomonas	Adenylosuccinate synthetase OS=Rhodopseudomonas faecalis OX=99655 GN=purA PE=3 SV=1
4726	27747	tr|A0A318TTZ2|A0A318TTZ2_9BRAD	52.29	21	3	2	4000000	3410000	2870000	3100000	2730000	1540000	1150000	3380000	40200000	36000000	38800000	37200000	1.47:1.25:1.05:1.14:1.00:0.56:0.42:1.24:14.73:13.20:14.23:13.63	3350000	2240000	38000000	1.49:1.00:16.95	18423	Bradyrhizobiaceae	Rhodopseudomonas	Carbonic anhydrase/acetyltransferase-like protein (Isoleucine patch superfamily) OS=Rhodopseudomonas faecalis OX=99655 GN=BJ122_10173 PE=4 SV=1
8	20581	tr|A0A0H5BK70|A0A0H5BK70_BLAVI	17.37	26	35	5	338000	870000	7670000	9420000	8370000	13100000	3030000	16400000	39900000	39300000	42800000	38900000	0.04:0.10:0.92:1.13:1.00:1.57:0.36:1.96:4.77:4.70:5.11:4.65	4940000	10300000	40200000	0.48:1.00:3.92	154687	Blastochloridaceae	Blastochloris	DNA-directed RNA polymerase subunit beta' OS=Blastochloris viridis OX=1079 GN=rpoC PE=3 SV=1
3972	8707	tr|A0A160UPB2|A0A160UPB2_9BRAD	38.54	17	4	2	7350000	8370000	3590000	3620000	4320000	6040000	5610000	5220000	39900000	46900000	28400000	28400000	1.70:1.94:0.83:0.84:1.00:1.40:1.30:1.21:9.23:10.84:6.57:6.56	5810000	5430000	36000000	1.07:1.00:6.63	47647	Bradyrhizobiaceae	Bradyrhizobium	3ketoacylCoA thiolase EC 23116 AcetylCoA acetyltransferase EC 2319 CDS OS=Bradyrhizobium sp. G22 OX=1839752 GN=BN2626_G22_1386 PE=3 SV=1
3451	23880	tr|A0A318TCL8|A0A318TCL8_9BRAD	34.35	23	5	5	4300000	3980000	8460000	7980000	10400000	6300000	5690000	5430000	39500000	40700000	38100000	39700000	0.41:0.38:0.81:0.77:1.00:0.60:0.55:0.52:3.80:3.91:3.66:3.81	6200000	6970000	39500000	0.89:1.00:5.66	36852	Bradyrhizobiaceae	Rhodopseudomonas	L-threonine ammonia-lyase OS=Rhodopseudomonas faecalis OX=99655 GN=BJ122_12030 PE=4 SV=1
1310	23220	tr|A0A182D3W6|A0A182D3W6_BLAVI	37.84	13	10	5	3480000	4780000	4270000	4200000	9890000	8260000	20300000	23000000	39400000	38600000	24400000	24400000	0.35:0.48:0.43:0.42:1.00:0.84:2.05:2.33:3.99:3.90:2.47:2.47	5540000	16000000	31700000	0.35:1.00:1.98	78593	Blastochloridaceae	Blastochloris	K(+)-insensitive pyrophosphate-energized proton pump OS=Blastochloris viridis OX=1079 GN=hppA PE=3 SV=1
4607	28669	tr|A0A5M6HUL1|A0A5M6HUL1_9RHIZ	29.99	18	3	3	4690000	4200000	2370000	472000	9260000	9060000	4810000	5760000	39400000	38700000	33900000	35800000	0.51:0.45:0.26:0.05:1.00:0.98:0.52:0.62:4.26:4.18:3.66:3.86	3670000	7370000	37000000	0.50:1.00:5.02	20743	Blastochloridaceae	Blastochloris	NAD(P)H-dependent oxidoreductase OS=Blastochloris sulfoviridis OX=50712 GN=F1193_12035 PE=4 SV=1
662	22526	tr|A0A318TGY2|A0A318TGY2_9BRAD	39.91	55	8	6	5560000	5280000	1810000	2150000	548000	520000	1210000	1070000	39300000	43100000	39400000	34600000	10.15:9.64:3.30:3.92:1.00:0.95:2.21:1.94:64.00:64.00:64.00:63.13	3730000	900000	39100000	4.14:1.00:43.44	27182	Bradyrhizobiaceae	Rhodopseudomonas	Invasion protein IalB OS=Rhodopseudomonas faecalis OX=99655 GN=BJ122_10530 PE=4 SV=1
1331	25040	tr|A0A7L4TAP0|A0A7L4TAP0_9BRAD	0	20	7	3	159000	278000	0	34800	0	48700	0	0	39200000	34300000	36200000	34400000	64.00:64.00:-:64.00:-:64.00:-:-:64.00:64.00:64.00:64.00	214000	48700	36000000	4.40:1.00:64.00	35611	Bradyrhizobiaceae	Afipia	Type I glyceraldehyde-3-phosphate dehydrogenase OS=Afipia sp. TMED4 OX=1986602 GN=CBB64_04000 PE=3 SV=1
729	22537	tr|Q6N857|Q6N857_RHOPA	44.14	23	8	2	4870000	5200000	2570000	3220000	1270000	1810000	2100000	2370000	39100000	36500000	36600000	38700000	3.83:4.10:2.02:2.54:1.00:1.42:1.65:1.87:30.81:28.78:28.84:30.46	3960000	1950000	37700000	2.03:1.00:19.30	36473	Bradyrhizobiaceae	Rhodopseudomonas	TrapT family dctP subunit C4-dicarboxylate periplasmic binding protein OS=Rhodopseudomonas palustris (strain ATCC BAA-98 / CGA009) OX=258594 GN=dctP1 PE=3 SV=1
1292	22222	tr|A0A318TG57|A0A318TG57_9BRAD	29.81	15	9	9	2830000	4560000	1290000	743000	2860000	2130000	565000	1240000	39000000	35500000	37800000	37000000	0.99:1.60:0.45:0.26:1.00:0.74:0.20:0.43:13.65:12.40:13.20:12.92	3510000	1810000	37300000	1.94:1.00:20.66	78495	Bradyrhizobiaceae	Rhodopseudomonas	Oligopeptidase B OS=Rhodopseudomonas faecalis OX=99655 GN=BJ122_1423 PE=3 SV=1
3446	9171	tr|A0A318T8W4|A0A318T8W4_9BRAD	39.34	26	2	2	10100000	8840000	5720000	7440000	1320000	1190000	3600000	3140000	38800000	35400000	45300000	31500000	7.68:6.71:4.35:5.65:1.00:0.91:2.73:2.38:29.45:26.90:34.39:23.96	8650000	2890000	37700000	2.99:1.00:13.05	11422	Bradyrhizobiaceae	Rhodopseudomonas	Uncharacterized protein OS=Rhodopseudomonas faecalis OX=99655 GN=BJ122_12747 PE=4 SV=1
1995	22313	tr|A0A318TNF7|A0A318TNF7_9BRAD	40.41	37	8	8	593000000	631000000	525000000	497000000	268000000	285000000	543000000	451000000	38600000	41100000	19900000	32700000	2.22:2.36:1.96:1.86:1.00:1.06:2.03:1.68:0.14:0.15:0.07:0.12	562000000	387000000	33100000	1.45:1.00:0.09	37006	Bradyrhizobiaceae	Rhodopseudomonas	Phosphoribosylformylglycinamidine cyclo-ligase OS=Rhodopseudomonas faecalis OX=99655 GN=purM PE=3 SV=1
866	21048	tr|A0A5M6I4Y8|A0A5M6I4Y8_9RHIZ	21.13	42	12	12	6970000	9440000	30200000	6000000	16600000	16400000	17900000	19500000	38500000	27000000	28300000	27600000	0.42:0.57:1.82:0.36:1.00:0.99:1.07:1.17:2.31:1.63:1.70:1.66	13300000	17600000	33300000	0.75:1.00:1.89	33396	Blastochloridaceae	Blastochloris	Porphobilinogen deaminase OS=Blastochloris sulfoviridis OX=50712 GN=hemC PE=3 SV=1
1024	21098	tr|A0A318TM82|A0A318TM82_9BRAD	19.97	44	12	12	27400000	26000000	16800000	19500000	15600000	15800000	19000000	10500000	38400000	38900000	26400000	28700000	1.76:1.67:1.08:1.25:1.00:1.01:1.22:0.67:2.47:2.50:1.70:1.84	22500000	15300000	41600000	1.47:1.00:2.72	46414	Bradyrhizobiaceae	Rhodopseudomonas	Formyl-CoA:oxalate CoA-transferase OS=Rhodopseudomonas faecalis OX=99655 GN=frc PE=3 SV=1
2043	23131	tr|A0A5M6I4P0|A0A5M6I4P0_9RHIZ	56.12	48	7	4	1330000	1420000	1260000	946000	8330000	4260000	10100000	11900000	38400000	25300000	33900000	28600000	0.16:0.17:0.15:0.11:1.00:0.51:1.21:1.43:4.61:3.04:4.07:3.43	1430000	8940000	31600000	0.16:1.00:3.53	19492	Blastochloridaceae	Blastochloris	Acetolactate synthase OS=Blastochloris sulfoviridis OX=50712 GN=ilvN PE=3 SV=1
3508	25821	tr|A0A318TCK0|A0A318TCK0_9BRAD	30.11	24	4	4	6800000	1330000	1650000	6400000	959000	1830000	863000	3800000	38300000	38500000	22800000	43200000	7.09:1.39:1.72:6.67:1.00:1.91:0.90:3.96:39.89:40.16:23.80:45.07	4050000	1890000	35700000	2.14:1.00:18.90	25990	Bradyrhizobiaceae	Rhodopseudomonas	Putative lipid-binding transport protein (Tim44 family) OS=Rhodopseudomonas faecalis OX=99655 GN=BJ122_112106 PE=3 SV=1
4708	11098	tr|A0A318TJ09|A0A318TJ09_9BRAD	62.1	13	3	3	3270000	2690000	3200000	3420000	3440000	2820000	3620000	4420000	38300000	37000000	38300000	49800000	0.95:0.78:0.93:1.00:1.00:0.82:1.05:1.29:11.15:10.77:11.15:14.49	3150000	3570000	41800000	0.88:1.00:11.68	24695	Bradyrhizobiaceae	Rhodopseudomonas	Uncharacterized protein DUF2848 OS=Rhodopseudomonas faecalis OX=99655 GN=BJ122_10277 PE=4 SV=1
715	8090	tr|A0A318TBA6|A0A318TBA6_9BRAD	49.28	35	9	4	7980000	9060000	6590000	6920000	3160000	2610000	4040000	3540000	38200000	39600000	37800000	38400000	2.53:2.87:2.09:2.19:1.00:0.83:1.28:1.12:12.09:12.53:11.96:12.15	7730000	3380000	38800000	2.29:1.00:11.49	39512	Bradyrhizobiaceae	Rhodopseudomonas	3-isopropylmalate dehydrogenase OS=Rhodopseudomonas faecalis OX=99655 GN=leuB PE=3 SV=1
869	50631	tr|A0A318TGV4|A0A318TGV4_9BRAD	35.85	30	11	7	1640000	2260000	923000	957000	947000	27400	2170000	2550000	38100000	39000000	38200000	30200000	1.73:2.39:0.97:1.01:1.00:0.03:2.29:2.70:40.26:41.23:40.31:31.86	2400000	2130000	38400000	1.13:1.00:18.01	59814	Bradyrhizobiaceae	Rhodopseudomonas	Electron transfer flavoprotein-ubiquinone oxidoreductase OS=Rhodopseudomonas faecalis OX=99655 GN=BJ122_10479 PE=4 SV=1
2918	24932	tr|A0A7W7Z435|A0A7W7Z435_9BRAD	40.05	20	4	2	7560000	7590000	8560000	2680000	3180000	5210000	3220000	3450000	37900000	35400000	37500000	35200000	2.37:2.38:2.69:0.84:1.00:1.64:1.01:1.08:11.89:11.11:11.77:11.05	7210000	3770000	36500000	1.91:1.00:9.68	22837	Bradyrhizobiaceae	Rhodopseudomonas	FixJ family two-component response regulator OS=Rhodopseudomonas rhenobacensis OX=87461 GN=HNR60_002016 PE=4 SV=1
1203	21556	tr|A0A318TAF4|A0A318TAF4_9BRAD	53.11	48	10	10	3790000	2620000	2670000	2450000	1870000	1460000	2710000	1900000	37800000	36700000	24500000	38100000	2.03:1.40:1.43:1.31:1.00:0.78:1.45:1.02:20.20:19.61:13.11:20.35	3290000	2300000	37700000	1.43:1.00:16.37	34183	Bradyrhizobiaceae	Rhodopseudomonas	NADH dehydrogenase OS=Rhodopseudomonas faecalis OX=99655 GN=BJ122_1147 PE=4 SV=1
187	3581	tr|Q13C98|Q13C98_RHOPS	45.03	53	15	10	9900000	8790000	7420000	3010000	2210000	2630000	3100000	4240000	37700000	42300000	57600000	60900000	4.47:3.97:3.35:1.36:1.00:1.19:1.40:1.92:17.01:19.11:26.03:27.50	7280000	3050000	49600000	2.39:1.00:16.29	39298	Bradyrhizobiaceae	Rhodopseudomonas	Fructose-1 6-bisphosphate aldolase OS=Rhodopseudomonas palustris (strain BisB5) OX=316057 GN=RPD_1053 PE=3 SV=1
2739	23207	tr|A0A348G2V3|A0A348G2V3_9RHIZ	8.83	6	5	3	75000000	49800000	43900000	47400000	37800000	39400000	41000000	37000000	37700000	38400000	35100000	14800000	1.98:1.32:1.16:1.25:1.00:1.04:1.08:0.98:1.00:1.02:0.93:0.39	54400000	39200000	34800000	1.39:1.00:0.89	91283	Blastochloridaceae	Blastochloris	3-hydroxyalkanoate synthetase OS=Blastochloris tepida OX=2233851 GN=BLTE_25710 PE=4 SV=1
4187	28810	tr|A0A318T6N1|A0A318T6N1_9BRAD	56.4	48	4	4	1870000	2180000	978000	386000	1200000	1420000	1550000	1820000	37600000	38900000	29900000	29200000	1.56:1.82:0.82:0.32:1.00:1.19:1.30:1.52:31.46:32.51:25.04:24.39	1560000	1720000	33900000	0.91:1.00:19.72	8435	Bradyrhizobiaceae	Rhodopseudomonas	Phosphoribosylformylglycinamidine synthase subunit PurS OS=Rhodopseudomonas faecalis OX=99655 GN=purS PE=3 SV=1
1482	2524	tr|A0A2S7XR68|A0A2S7XR68_9GAMM	26.64	20	7	3	13900000	4540000	7400000	5840000	7250000	2450000	10600000	9860000	37500000	40700000	42700000	51000000	1.92:0.63:1.02:0.81:1.00:0.34:1.46:1.36:5.17:5.62:5.89:7.03	8680000	7540000	43000000	1.15:1.00:5.70	45222	Chromatiaceae	Chromatium	Pyrophosphate--fructose 6-phosphate 1-phosphotransferase OS=Chromatium okenii OX=61644 GN=pfp PE=3 SV=1
4720	26961	tr|A0A318TV67|A0A318TV67_9BRAD	53.02	16	3	3	213000	1360000	764000	1030000	603000	683000	985000	872000	37300000	33700000	31500000	29900000	0.35:2.26:1.27:1.71:1.00:1.13:1.63:1.45:61.82:55.88:52.33:49.54	1480000	915000	33100000	1.61:1.00:36.15	26227	Bradyrhizobiaceae	Rhodopseudomonas	Uncharacterized protein DUF1236 OS=Rhodopseudomonas faecalis OX=99655 GN=BJ122_10670 PE=4 SV=1
10	50303	tr|A0A2T0PIS7|A0A2T0PIS7_RHITR	12.29	27	34	2	3460000	4030000	1930000	436000	27900	1810000	0	0	37100000	34600000	44100000	41800000	64.00:64.00:64.00:15.65:1.00:64.00:0:0:64.00:64.00:64.00:64.00	3290000	1830000	39400000	1.79:1.00:21.50	155494	Rhizobiaceae	Rhizobium	DNA-directed RNA polymerase subunit beta' OS=Rhizobium tropici OX=398 GN=rpoC PE=3 SV=1
429	20719	tr|A0A318TJS6|A0A318TJS6_9BRAD	38.53	21	14	5	1720000	650000	2070000	1780000	3000000	2030000	2170000	4430000	37100000	33400000	32100000	31300000	0.57:0.22:0.69:0.59:1.00:0.67:0.72:1.48:12.33:11.13:10.67:10.40	1700000	2910000	33500000	0.58:1.00:11.50	98647	Bradyrhizobiaceae	Rhodopseudomonas	Aconitate hydratase OS=Rhodopseudomonas faecalis OX=99655 GN=BJ122_11440 PE=3 SV=1
4113	30761	tr|A0A318T747|A0A318T747_9BRAD	35.66	27	4	4	212000	417000	454000	47900	84800	394000	351000	83700	37000000	38800000	30300000	26600000	2.50:4.91:5.35:0.57:1.00:4.64:4.14:0.99:64.00:64.00:64.00:64.00	283000	228000	33200000	1.24:1.00:64.00	15844	Bradyrhizobiaceae	Rhodopseudomonas	EF hand domain-containing protein OS=Rhodopseudomonas faecalis OX=99655 GN=BJ122_13518 PE=4 SV=1
302	20731	tr|A0A318TJ07|A0A318TJ07_9BRAD	41.73	52	14	13	890000	2300000	1550000	1870000	737000	670000	2850000	1200000	36900000	47500000	22500000	35400000	1.21:3.12:2.11:2.54:1.00:0.91:3.87:1.63:50.09:64.00:30.60:48.04	1830000	1360000	41500000	1.34:1.00:30.42	47327	Bradyrhizobiaceae	Rhodopseudomonas	Aspartyl-tRNA(Asn)/glutamyl-tRNA(Gln) amidotransferase subunit A OS=Rhodopseudomonas faecalis OX=99655 GN=BJ122_10276 PE=3 SV=1
3251	25671	tr|A0A5M6I301|A0A5M6I301_9RHIZ	55.97	6	4	4	4780000	5020000	4550000	4490000	9520000	8460000	9090000	7510000	36900000	28200000	32600000	29000000	0.50:0.53:0.48:0.47:1.00:0.89:0.96:0.79:3.88:2.96:3.43:3.05	4760000	8640000	31700000	0.55:1.00:3.67	113966	Blastochloridaceae	Blastochloris	Efflux pump membrane transporter OS=Blastochloris sulfoviridis OX=50712 GN=F1193_05155 PE=3 SV=1
3186	25644	tr|A0A318TM80|A0A318TM80_9BRAD	26.16	11	3	3	6790000	1200000	616000	1060000	2700000	1780000	396000	474000	36800000	25500000	27100000	32200000	2.51:0.44:0.23:0.39:1.00:0.66:0.15:0.18:13.61:9.44:10.04:11.92	6800000	2110000	30400000	3.21:1.00:14.37	36459	Bradyrhizobiaceae	Rhodopseudomonas	UDP-glucose 4-epimerase OS=Rhodopseudomonas faecalis OX=99655 GN=BJ122_104148 PE=3 SV=1
867	475	tr|A0A4R3MST3|A0A4R3MST3_9GAMM	50.62	28	11	11	176000000	186000000	243000000	213000000	114000000	124000000	155000000	169000000	36100000	30400000	41600000	38200000	1.55:1.63:2.14:1.87:1.00:1.09:1.36:1.49:0.32:0.27:0.37:0.34	205000000	141000000	36600000	1.45:1.00:0.26	37597	Chromatiaceae	Thiobaca	NitT/TauT family transport system substrate-binding protein OS=Thiobaca trueperi OX=127458 GN=EDC35_10864 PE=4 SV=1
3896	26188	tr|A0A0D7E8K2|A0A0D7E8K2_RHOPL	56.42	5	4	2	209000	371000	570000	539000	973000	1210000	808000	819000	36000000	42000000	30700000	24500000	0.21:0.38:0.59:0.55:1.00:1.25:0.83:0.84:36.96:43.17:31.59:25.17	422000	953000	33300000	0.44:1.00:34.92	73903	Bradyrhizobiaceae	Rhodopseudomonas	Ligand-gated channel protein OS=Rhodopseudomonas palustris OX=1076 GN=OO17_25270 PE=3 SV=1
1114	12819	tr|A0A5M6I356|A0A5M6I356_9RHIZ	45.94	25	7	2	1840000	1750000	1280000	1020000	2470000	2610000	9170000	4830000	35800000	29300000	29000000	36900000	0.75:0.71:0.52:0.41:1.00:1.06:3.72:1.96:14.53:11.89:11.75:14.97	1510000	4770000	32800000	0.32:1.00:6.87	41869	Blastochloridaceae	Blastochloris	ABC transporter substrate-binding protein OS=Blastochloris sulfoviridis OX=50712 GN=F1193_06540 PE=3 SV=1
1843	9722	tr|A0A318TPU3|A0A318TPU3_9BRAD	37.02	30	6	2	3270000	1640000	1150000	2990000	1420000	1050000	670000	0	35700000	44400000	33600000	27500000	2.31:1.16:0.81:2.11:1.00:0.74:0.47:0:25.26:31.39:23.73:19.40	3160000	1050000	35300000	3.03:1.00:33.77	23964	Bradyrhizobiaceae	Rhodopseudomonas	50S ribosomal protein L1 OS=Rhodopseudomonas faecalis OX=99655 GN=rplA PE=3 SV=1
736	21016	tr|A0A318T9Z2|A0A318T9Z2_9BRAD	33.15	41	12	8	4100000	4410000	7390000	7770000	10600000	13100000	6320000	9440000	35500000	34400000	30400000	31400000	0.39:0.42:0.70:0.73:1.00:1.24:0.60:0.89:3.35:3.25:2.87:2.96	6230000	10900000	32900000	0.57:1.00:3.02	38757	Bradyrhizobiaceae	Rhodopseudomonas	Amino acid ABC transporter substrate-binding protein (PAAT family) OS=Rhodopseudomonas faecalis OX=99655 GN=BJ122_12248 PE=3 SV=1
2258	10215	tr|A0A5M6I259|A0A5M6I259_9RHIZ	25.06	23	6	4	4070000	2250000	5730000	8150000	20400000	22800000	27000000	30500000	35500000	37300000	36900000	36700000	0.20:0.11:0.28:0.40:1.00:1.12:1.32:1.49:1.74:1.83:1.81:1.80	6380000	27200000	37400000	0.24:1.00:1.38	38600	Blastochloridaceae	Blastochloris	PstS family phosphate ABC transporter substrate-binding protein OS=Blastochloris sulfoviridis OX=50712 GN=F1193_08135 PE=4 SV=1
612	21234	tr|A0A5M6HKI5|A0A5M6HKI5_9RHIZ	27.88	29	10	7	1860000	118000	0	354000	4100000	4150000	6810000	6960000	35300000	43600000	40400000	23800000	0.45:0.03:0:0.09:1.00:1.01:1.66:1.70:8.60:10.63:9.86:5.80	1300000	5500000	44300000	0.24:1.00:8.06	57149	Blastochloridaceae	Blastochloris	Acetyl-CoA hydrolase/transferase family protein OS=Blastochloris sulfoviridis OX=50712 GN=F1193_15605 PE=3 SV=1
3516	28935	tr|A0A318TKY8|A0A318TKY8_9BRAD	20.1	23	4	3	5480000	27600000	20100000	19500000	7410000	7830000	6180000	6560000	35300000	31300000	16900000	16100000	0.74:3.72:2.71:2.63:1.00:1.06:0.83:0.89:4.76:4.23:2.29:2.17	18300000	7080000	44800000	2.58:1.00:6.33	18150	Bradyrhizobiaceae	Rhodopseudomonas	Starvation-inducible DNA-binding protein OS=Rhodopseudomonas faecalis OX=99655 GN=BJ122_103151 PE=3 SV=1
1552	4015	tr|A0A4R3MUZ9|A0A4R3MUZ9_9GAMM	20.09	13	6	6	43200000	39600000	48300000	42300000	41000000	46300000	46100000	39500000	35200000	24700000	25900000	25000000	1.05:0.97:1.18:1.03:1.00:1.13:1.12:0.96:0.86:0.60:0.63:0.61	43400000	43200000	27700000	1.00:1.00:0.64	42849	Chromatiaceae	Thiobaca	Tellurite resistance protein TerA OS=Thiobaca trueperi OX=127458 GN=EDC35_108195 PE=4 SV=1
474	2005	tr|A0A318TM06|A0A318TM06_9BRAD	48.57	41	14	6	4680000	5310000	2410000	1950000	1400000	1570000	2290000	2020000	35100000	41000000	36100000	40500000	3.35:3.80:1.72:1.40:1.00:1.13:1.64:1.45:25.14:29.35:25.85:28.97	3590000	2060000	39200000	1.74:1.00:19.06	45041	Bradyrhizobiaceae	Rhodopseudomonas	Enolase OS=Rhodopseudomonas faecalis OX=99655 GN=eno PE=3 SV=1
2694	2230	tr|A0A5M6I465|A0A5M6I465_9RHIZ	33.59	36	6	4	3410000	4040000	1950000	1620000	12600000	12800000	21600000	24300000	34900000	33700000	23100000	21600000	0.27:0.32:0.16:0.13:1.00:1.01:1.71:1.93:2.77:2.67:1.84:1.71	2750000	17800000	28300000	0.15:1.00:1.59	17203	Blastochloridaceae	Blastochloris	Transcription elongation factor GreA OS=Blastochloris sulfoviridis OX=50712 GN=greA PE=3 SV=1
4877	31860	tr|A0A6N8DVV6|A0A6N8DVV6_9RHIZ	39.26	26	3	3	14900000	6640000	12400000	10800000	2610000	1110000	1190000	1490000	34800000	41500000	40600000	39400000	5.73:2.55:4.75:4.14:1.00:0.43:0.46:0.57:13.34:15.94:15.58:15.12	11400000	1600000	39100000	7.11:1.00:24.44	15805	Hyphomicrobiaceae	Rhodoplanes	Chemotaxis protein OS=Rhodoplanes serenus OX=200615 GN=GJ689_06855 PE=4 SV=1
5508	30096	tr|A0A318TC98|A0A318TC98_9BRAD	0	30	2	2	21800000	15600000	0	4830000	0	0	2060000	0	34800000	21400000	11900000	28000000	64.00:64.00:-:64.00:-:-:64.00:-:64.00:64.00:64.00:64.00	17900000	2060000	28900000	8.65:1.00:14.01	16765	Bradyrhizobiaceae	Rhodopseudomonas	Superoxide dismutase [Cu-Zn] OS=Rhodopseudomonas faecalis OX=99655 GN=BJ122_1123 PE=3 SV=1
1345	21789	tr|A0A318TK56|A0A318TK56_9BRAD	35.65	20	8	5	1820000	1950000	1220000	635000	759000	1180000	919000	185000	34700000	36100000	38100000	39800000	2.40:2.57:1.61:0.84:1.00:1.56:1.21:0.24:45.75:47.54:50.22:52.46	1410000	843000	37200000	1.67:1.00:44.08	56840	Bradyrhizobiaceae	Rhodopseudomonas	2-isopropylmalate synthase OS=Rhodopseudomonas faecalis OX=99655 GN=leuA PE=3 SV=1
996	21451	tr|A0A7W7Z1L7|A0A7W7Z1L7_9BRAD	33.83	31	10	2	7520000	7410000	4260000	3610000	3540000	1350000	3580000	3220000	34600000	33000000	36900000	34400000	2.13:2.09:1.21:1.02:1.00:0.38:1.01:0.91:9.79:9.34:10.42:9.72	5700000	2920000	34700000	1.95:1.00:11.88	36316	Bradyrhizobiaceae	Rhodopseudomonas	Small subunit ribosomal protein S2 OS=Rhodopseudomonas rhenobacensis OX=87461 GN=HNR60_001091 PE=4 SV=1
2963	25536	tr|A0A318TFS8|A0A318TFS8_9BRAD	31.91	25	6	6	3280000	2320000	1030000	799000	1990000	1790000	1010000	380000	34600000	38500000	30300000	32100000	1.65:1.17:0.52:0.40:1.00:0.90:0.51:0.19:17.37:19.31:15.23:16.11	2090000	1420000	33900000	1.47:1.00:23.78	29605	Bradyrhizobiaceae	Rhodopseudomonas	Universal stress protein family protein OS=Rhodopseudomonas faecalis OX=99655 GN=BJ122_11558 PE=3 SV=1
978	6716	tr|A0A3S5CY26|A0A3S5CY26_9RHIZ	33.21	34	8	5	3980000	1590000	1190000	1180000	193000	774000	1250000	1340000	34500000	34000000	27600000	22900000	20.58:8.23:6.15:6.12:1.00:4.00:6.44:6.90:64.00:64.00:64.00:64.00	1990000	971000	43400000	2.05:1.00:44.71	40934	Hyphomicrobiaceae	Rhodoplanes	Acetyl-CoA acetyltransferase OS=Rhodoplanes piscinae OX=444923 GN=phaA_1 PE=3 SV=1
1305	21216	tr|A0A318TDX8|A0A318TDX8_9BRAD	26.14	17	6	6	1760000	1710000	395000	304000	111000	0	603000	130000	34300000	32300000	39000000	37100000	15.79:15.32:3.54:2.72:1.00:0:5.41:1.17:64.00:64.00:64.00:64.00	1590000	583000	35700000	2.72:1.00:61.22	55407	Bradyrhizobiaceae	Rhodopseudomonas	Uncharacterized protein OS=Rhodopseudomonas faecalis OX=99655 GN=BJ122_11526 PE=4 SV=1
1693	22568	tr|Q6N1U5|Q6N1U5_RHOPA	2.29	25	7	4	29500000	30400000	20800000	26200000	27200000	25900000	33000000	34300000	34300000	45700000	19300000	26700000	1.08:1.12:0.76:0.96:1.00:0.95:1.21:1.26:1.26:1.68:0.71:0.98	26800000	30300000	33100000	0.89:1.00:1.09	41933	Bradyrhizobiaceae	Rhodopseudomonas	Phosphoserine aminotransferase OS=Rhodopseudomonas palustris (strain ATCC BAA-98 / CGA009) OX=258594 GN=serC PE=4 SV=1
1062	6099	tr|A0A515KRF1|A0A515KRF1_9BRAD	43.38	28	6	2	2570000	2800000	386000	776000	502000	437000	639000	655000	34100000	16100000	34100000	37200000	5.11:5.58:0.77:1.54:1.00:0.87:1.27:1.30:64.00:32.04:64.00:64.00	1630000	589000	30300000	2.77:1.00:51.55	40574	Bradyrhizobiaceae	Tardiphaga	Acetyl-CoA C-acetyltransferase OS=Tardiphaga sp. vice352 OX=2592816 GN=FNL55_25235 PE=3 SV=1
2388	10695	tr|A0A318TEK0|A0A318TEK0_9BRAD	39.23	27	4	4	3790000	3520000	1620000	1930000	570000	298000	1240000	1100000	34100000	34100000	43700000	43500000	6.66:6.19:2.84:3.39:1.00:0.52:2.17:1.92:59.78:59.83:64.00:64.00	2720000	897000	38800000	3.03:1.00:43.28	19272	Bradyrhizobiaceae	Rhodopseudomonas	ATP synthase subunit b OS=Rhodopseudomonas faecalis OX=99655 GN=atpF PE=3 SV=1
813	4376	tr|A0A318TKM6|A0A318TKM6_9BRAD	30.08	28	11	8	11300000	5910000	5370000	5900000	8510000	5210000	4210000	12600000	33900000	37900000	34600000	36700000	1.33:0.69:0.63:0.69:1.00:0.61:0.49:1.48:3.98:4.46:4.06:4.32	8200000	10300000	35800000	0.79:1.00:3.46	53400	Bradyrhizobiaceae	Rhodopseudomonas	Periplasmic serine endoprotease DegP-like OS=Rhodopseudomonas faecalis OX=99655 GN=BJ122_102189 PE=3 SV=1
1714	28259	tr|A0A318TIX4|A0A318TIX4_9BRAD	39.06	84	8	8	16300000	17000000	16500000	14900000	5740000	4950000	8310000	8960000	33900000	33500000	27600000	31200000	2.83:2.96:2.87:2.60:1.00:0.86:1.45:1.56:5.91:5.84:4.80:5.43	16200000	6990000	31600000	2.31:1.00:4.51	14436	Bradyrhizobiaceae	Rhodopseudomonas	DNA-directed RNA polymerase subunit omega OS=Rhodopseudomonas faecalis OX=99655 GN=rpoZ PE=3 SV=1
552	20863	tr|A0A318T9D9|A0A318T9D9_9BRAD	30.1	25	13	13	6630000	8680000	17700000	14100000	8290000	3760000	4370000	4770000	33800000	32900000	33400000	32800000	0.80:1.05:2.14:1.70:1.00:0.45:0.53:0.58:4.07:3.97:4.03:3.96	13300000	5390000	33400000	2.47:1.00:6.20	71001	Bradyrhizobiaceae	Rhodopseudomonas	Microcin C transport system substrate-binding protein OS=Rhodopseudomonas faecalis OX=99655 GN=BJ122_11862 PE=3 SV=1
76	20631	tr|A0A5M6I443|A0A5M6I443_9RHIZ	31.85	35	18	5	12800000	12600000	8370000	9050000	21500000	20100000	29100000	27600000	33500000	37300000	32100000	31800000	0.59:0.58:0.39:0.42:1.00:0.94:1.36:1.29:1.56:1.74:1.50:1.48	10700000	24600000	33700000	0.43:1.00:1.37	68538	Blastochloridaceae	Blastochloris	Chaperone protein DnaK OS=Blastochloris sulfoviridis OX=50712 GN=dnaK PE=2 SV=1
1253	21142	tr|A0A348G5A4|A0A348G5A4_9RHIZ	36.54	15	7	4	5120000	6050000	4980000	5320000	9810000	12900000	11700000	9450000	33500000	33900000	17300000	30800000	0.52:0.62:0.51:0.54:1.00:1.31:1.19:0.96:3.41:3.46:1.76:3.14	5480000	11000000	28900000	0.50:1.00:2.63	55690	Blastochloridaceae	Blastochloris	Bifunctional purine biosynthesis protein PurH OS=Blastochloris tepida OX=2233851 GN=purH PE=3 SV=1
1425	22252	tr|A0A318TCR1|A0A318TCR1_9BRAD	37.42	37	7	7	3270000	4010000	1630000	1550000	564000	616000	1410000	1700000	33500000	38900000	29100000	32400000	5.79:7.10:2.89:2.75:1.00:1.09:2.49:3.02:59.44:64.00:51.63:57.34	2670000	1220000	33500000	2.20:1.00:27.51	33483	Bradyrhizobiaceae	Rhodopseudomonas	(3S)-malyl-CoA thioesterase OS=Rhodopseudomonas faecalis OX=99655 GN=BJ122_11278 PE=3 SV=1
1864	10689	tr|A0A5M6I4B5|A0A5M6I4B5_9RHIZ	27.16	18	7	7	6400000	12800000	3730000	3710000	11300000	10400000	4810000	5380000	33400000	35800000	42400000	36700000	0.57:1.13:0.33:0.33:1.00:0.92:0.43:0.48:2.95:3.17:3.75:3.24	7070000	8020000	37100000	0.88:1.00:4.62	43165	Blastochloridaceae	Blastochloris	Cell surface protein OS=Blastochloris sulfoviridis OX=50712 GN=F1193_04000 PE=4 SV=1
685	21464	tr|A0A318TK44|A0A318TK44_9BRAD	49.74	25	10	10	4520000	4590000	3300000	3360000	4270000	2280000	3560000	6710000	33300000	38000000	42100000	34200000	1.06:1.08:0.77:0.79:1.00:0.54:0.83:1.57:7.81:8.90:9.88:8.01	3940000	6750000	39200000	0.58:1.00:5.81	58189	Bradyrhizobiaceae	Rhodopseudomonas	(R)-citramalate synthase OS=Rhodopseudomonas faecalis OX=99655 GN=BJ122_102312 PE=3 SV=1
1558	23161	tr|Q13AA2|Q13AA2_RHOPS	22.15	17	7	4	3730000	5510000	2370000	2740000	9370000	11100000	712000	793000	33300000	26600000	12400000	13900000	0.40:0.59:0.25:0.29:1.00:1.18:0.08:0.08:3.56:2.84:1.32:1.48	3790000	6960000	26900000	0.54:1.00:3.87	49438	Bradyrhizobiaceae	Rhodopseudomonas	Tryptophan synthase beta chain OS=Rhodopseudomonas palustris (strain BisB5) OX=316057 GN=trpB PE=3 SV=1
1696	23058	tr|A0A5M6I5A1|A0A5M6I5A1_9RHIZ	58.27	50	8	8	3710000	4020000	3400000	3060000	9630000	10500000	10800000	10700000	33300000	35100000	41100000	40400000	0.38:0.42:0.35:0.32:1.00:1.09:1.13:1.11:3.46:3.65:4.26:4.20	3550000	10400000	37700000	0.34:1.00:3.62	23416	Blastochloridaceae	Blastochloris	2 3-bisphosphoglycerate-dependent phosphoglycerate mutase OS=Blastochloris sulfoviridis OX=50712 GN=gpmA PE=3 SV=1
5528	34029	tr|A0A318TN21|A0A318TN21_9BRAD	50.68	16	2	2	2730000	2060000	1150000	2010000	1090000	1240000	2280000	1520000	33100000	31700000	40300000	49700000	2.52:1.90:1.06:1.86:1.00:1.14:2.10:1.40:30.45:29.16:37.09:45.75	2280000	1650000	38700000	1.38:1.00:23.41	19160	Bradyrhizobiaceae	Rhodopseudomonas	Ubiquinol-cytochrome c reductase iron-sulfur subunit OS=Rhodopseudomonas faecalis OX=99655 GN=BJ122_10371 PE=3 SV=1
2402	24307	tr|A0A318T966|A0A318T966_9BRAD	48.68	12	4	3	21300000	18100000	23000000	19200000	12500000	11600000	13800000	13100000	33000000	30700000	28400000	33200000	1.71:1.45:1.85:1.54:1.00:0.93:1.11:1.05:2.65:2.46:2.28:2.66	20400000	12700000	32100000	1.60:1.00:2.52	31783	Bradyrhizobiaceae	Rhodopseudomonas	ATP synthase gamma chain OS=Rhodopseudomonas faecalis OX=99655 GN=atpG PE=3 SV=1
760	21196	tr|A0A318TBF4|A0A318TBF4_9BRAD	60.93	28	10	10	2340000	2210000	2270000	2840000	1770000	1770000	471000	827000	32500000	26000000	32400000	31100000	1.32:1.25:1.28:1.60:1.00:1.00:0.27:0.47:18.31:14.64:18.26:17.54	2590000	2500000	35000000	1.04:1.00:14.03	58576	Bradyrhizobiaceae	Rhodopseudomonas	Metallo-beta-lactamase family protein OS=Rhodopseudomonas faecalis OX=99655 GN=BJ122_11523 PE=4 SV=1
3450	23626	tr|A0A5M6HV39|A0A5M6HV39_9RHIZ	35.47	11	5	5	994000	1090000	1130000	3720000	6860000	6820000	4990000	3800000	32500000	28800000	32300000	31400000	0.14:0.16:0.16:0.54:1.00:0.99:0.73:0.55:4.74:4.20:4.70:4.57	1790000	6050000	31200000	0.30:1.00:5.17	52266	Blastochloridaceae	Blastochloris	Mannose-1-phosphate guanylyltransferase OS=Blastochloris sulfoviridis OX=50712 GN=F1193_12065 PE=3 SV=1
1672	5770	tr|A0A318TTW6|A0A318TTW6_9BRAD	43.34	22	7	7	7630000	8490000	1860000	1950000	1730000	1900000	2890000	2730000	32400000	30100000	32900000	24900000	4.42:4.92:1.08:1.13:1.00:1.10:1.67:1.58:18.76:17.40:19.07:14.42	4990000	2430000	30100000	2.05:1.00:12.37	41267	Bradyrhizobiaceae	Rhodopseudomonas	Acetyl-CoA C-acetyltransferase/acetyl-CoA acyltransferase OS=Rhodopseudomonas faecalis OX=99655 GN=BJ122_1084 PE=3 SV=1
831	21581	tr|A0A0H5BNR1|A0A0H5BNR1_BLAVI	32.41	25	8	5	12300000	17200000	15300000	16300000	32000000	29900000	40100000	38900000	32200000	26300000	31700000	31600000	0.38:0.54:0.48:0.51:1.00:0.94:1.25:1.22:1.01:0.82:0.99:0.99	15600000	35200000	30400000	0.44:1.00:0.86	53504	Blastochloridaceae	Blastochloris	Methylmalonate-semialdehyde dehydrogenase OS=Blastochloris viridis OX=1079 GN=mmsA PE=4 SV=1
1692	21976	tr|A0A318TSS8|A0A318TSS8_9BRAD	28.17	36	8	8	7250000	8380000	6230000	5810000	5770000	5090000	6550000	6670000	32200000	57300000	27100000	21800000	1.26:1.45:1.08:1.01:1.00:0.88:1.14:1.16:5.59:9.94:4.70:3.78	7120000	6040000	43600000	1.18:1.00:7.21	50751	Bradyrhizobiaceae	Rhodopseudomonas	Amidohydrolase OS=Rhodopseudomonas faecalis OX=99655 GN=BJ122_102131 PE=4 SV=1
4159	25847	tr|A0A5M6HIN1|A0A5M6HIN1_9RHIZ	34.98	29	4	4	5680000	7560000	8580000	4560000	17300000	16300000	19100000	20800000	32200000	30400000	30600000	31400000	0.33:0.44:0.50:0.26:1.00:0.94:1.10:1.20:1.86:1.76:1.77:1.82	6880000	18300000	31200000	0.37:1.00:1.70	22830	Blastochloridaceae	Blastochloris	Methyltransferase domain-containing protein OS=Blastochloris sulfoviridis OX=50712 GN=F1193_16315 PE=4 SV=1
1008	21070	tr|A0A5M6HXV0|A0A5M6HXV0_9RHIZ	28.37	18	10	9	12500000	9910000	16000000	14700000	21300000	21700000	22100000	23000000	32000000	29200000	27600000	27600000	0.59:0.47:0.75:0.69:1.00:1.02:1.04:1.08:1.51:1.37:1.30:1.30	13400000	22000000	29100000	0.61:1.00:1.32	81696	Blastochloridaceae	Blastochloris	NADP-dependent malic enzyme OS=Blastochloris sulfoviridis OX=50712 GN=F1193_10445 PE=3 SV=1
2966	26060	tr|A0A318TDP2|A0A318TDP2_9BRAD	24.52	31	5	5	10500000	10700000	10200000	10600000	12700000	11100000	16900000	10900000	31800000	21700000	20100000	25400000	0.83:0.84:0.80:0.84:1.00:0.88:1.33:0.86:2.51:1.71:1.58:2.00	10900000	18200000	26400000	0.60:1.00:1.45	16850	Bradyrhizobiaceae	Rhodopseudomonas	Uncharacterized protein GlcG (DUF336 family) OS=Rhodopseudomonas faecalis OX=99655 GN=BJ122_11649 PE=4 SV=1
443	9449	tr|A0A318TIG4|A0A318TIG4_9BRAD	36.92	40	14	5	690000	518000	556000	85400	319000	1210000	798000	591000	31700000	25900000	32300000	22800000	2.16:1.63:1.74:0.27:1.00:3.80:2.50:1.85:64.00:64.00:64.00:64.00	462000	730000	28100000	0.63:1.00:38.55	48842	Bradyrhizobiaceae	Rhodopseudomonas	Glutamate dehydrogenase OS=Rhodopseudomonas faecalis OX=99655 GN=BJ122_103181 PE=3 SV=1
1413	14274	Q6N0W9|RBL2_RHOPA	24.46	17	8	3	3720000	7830000	1950000	2110000	898000	1630000	4360000	2250000	31700000	29700000	55200000	11400000	4.14:8.71:2.17:2.35:1.00:1.82:4.86:2.50:35.26:33.09:61.48:12.71	5310000	2500000	32000000	2.13:1.00:12.83	50485	Bradyrhizobiaceae	Rhodopseudomonas	Ribulose bisphosphate carboxylase OS=Rhodopseudomonas palustris (strain ATCC BAA-98 / CGA009) OX=258594 GN=cbbM PE=1 SV=1
2394	23001	tr|A0A5M6HUK7|A0A5M6HUK7_9RHIZ	37.44	25	6	6	7720000	4140000	11100000	5360000	13500000	13000000	15700000	15800000	31700000	30600000	38900000	38600000	0.57:0.31:0.83:0.40:1.00:0.96:1.16:1.17:2.35:2.27:2.88:2.86	9510000	14500000	34900000	0.66:1.00:2.41	42118	Blastochloridaceae	Blastochloris	Uncharacterized protein OS=Blastochloris sulfoviridis OX=50712 GN=F1193_11985 PE=4 SV=1
2348	23684	tr|A0A318TIT0|A0A318TIT0_9BRAD	22.5	17	4	4	46100000	68000000	78600000	64500000	45300000	42200000	61700000	67800000	31600000	30700000	37600000	31100000	1.02:1.50:1.73:1.42:1.00:0.93:1.36:1.50:0.70:0.68:0.83:0.69	64300000	54200000	32800000	1.19:1.00:0.60	49433	Bradyrhizobiaceae	Rhodopseudomonas	Leucyl aminopeptidase OS=Rhodopseudomonas faecalis OX=99655 GN=BJ122_11855 PE=3 SV=1
94	20689	tr|A0A318TC87|A0A318TC87_9BRAD	44.87	31	20	7	3110000	2390000	3440000	4030000	1290000	1620000	2750000	1740000	31500000	32000000	32600000	30800000	2.40:1.85:2.66:3.12:1.00:1.25:2.13:1.35:24.40:24.77:25.25:23.81	3250000	2210000	32400000	1.47:1.00:14.66	96709	Bradyrhizobiaceae	Rhodopseudomonas	Chaperone protein ClpB OS=Rhodopseudomonas faecalis OX=99655 GN=clpB PE=3 SV=1
170	76	tr|A0A0U5E5G5|A0A0U5E5G5_9GAMM	33.44	25	16	4	134000000	247000000	135000000	111000000	57900000	64300000	94000000	101000000	31400000	26000000	25500000	24300000	2.31:4.26:2.33:1.91:1.00:1.11:1.63:1.74:0.54:0.45:0.44:0.42	156000000	79300000	26800000	1.97:1.00:0.34	71706	Chromatiaceae	Thiocapsa	Acetyl-coenzyme A synthetase OS=Thiocapsa sp. KS1 OX=610332 GN=acs PE=3 SV=1
610	20854	tr|A0A318TLH8|A0A318TLH8_9BRAD	45.77	42	11	6	1960000	2620000	4100000	3540000	3130000	4260000	3080000	5070000	31300000	23800000	31500000	29600000	0.62:0.84:1.31:1.13:1.00:1.36:0.98:1.62:9.99:7.59:10.04:9.43	3070000	3960000	29000000	0.78:1.00:7.32	34320	Bradyrhizobiaceae	Rhodopseudomonas	Anthranilate phosphoribosyltransferase OS=Rhodopseudomonas faecalis OX=99655 GN=trpD PE=3 SV=1
1648	23073	tr|A0A318TNL6|A0A318TNL6_9BRAD	32.71	28	7	6	9050000	9990000	8350000	2040000	8040000	8250000	7910000	6340000	31300000	27100000	48100000	40300000	1.13:1.24:1.04:0.25:1.00:1.03:0.98:0.79:3.89:3.37:5.99:5.01	7480000	7710000	51200000	0.97:1.00:6.65	31911	Bradyrhizobiaceae	Rhodopseudomonas	Elongation factor Ts OS=Rhodopseudomonas faecalis OX=99655 GN=tsf PE=3 SV=1
408	50315	tr|A0A2S0UI14|A0A2S0UI14_9RHOB	43.5	42	18	4	9440000	8780000	6830000	7770000	3600000	3670000	7290000	6810000	31200000	37700000	26900000	33100000	2.62:2.44:1.90:2.16:1.00:1.02:2.02:1.89:8.65:10.47:7.48:9.19	8200000	5470000	32200000	1.50:1.00:5.89	43133	Rhodobacteraceae	Gemmobacter	Elongation factor Tu OS=Gemmobacter sp. HYN0069 OX=2169400 GN=tuf PE=3 SV=1
3892	25470	tr|A0A318TB22|A0A318TB22_9BRAD	72.85	13	4	4	3220000	3840000	4430000	4570000	2510000	2600000	2410000	2670000	31200000	31000000	31400000	31800000	1.28:1.53:1.76:1.82:1.00:1.04:0.96:1.06:12.42:12.33:12.51:12.68	4090000	2550000	31400000	1.61:1.00:12.32	41912	Bradyrhizobiaceae	Rhodopseudomonas	Uncharacterized protein OS=Rhodopseudomonas faecalis OX=99655 GN=BJ122_1303 PE=4 SV=1
1709	22308	tr|A0A5M6I498|A0A5M6I498_9RHIZ	30.92	48	9	8	61700000	53800000	50200000	47300000	48700000	55500000	82900000	79100000	31100000	33500000	30300000	28300000	1.27:1.10:1.03:0.97:1.00:1.14:1.70:1.62:0.64:0.69:0.62:0.58	54500000	66600000	30800000	0.82:1.00:0.46	33668	Blastochloridaceae	Blastochloris	Chlorophyll synthesis pathway protein BchC OS=Blastochloris sulfoviridis OX=50712 GN=bchC PE=4 SV=1
3116	4333	tr|A0A5M6HSR5|A0A5M6HSR5_9RHIZ	20.51	9	4	2	4760000	4730000	7150000	13500000	36100000	36200000	24300000	23200000	30800000	30000000	25600000	22500000	0.13:0.13:0.20:0.37:1.00:1.00:0.67:0.64:0.85:0.83:0.71:0.62	7540000	30400000	27500000	0.25:1.00:0.91	54528	Blastochloridaceae	Blastochloris	Porin OS=Blastochloris sulfoviridis OX=50712 GN=F1193_13025 PE=3 SV=1
1710	22807	tr|A0A318TL38|A0A318TL38_9BRAD	42.81	21	7	7	441000	355000	177000	1190000	565000	453000	417000	912000	30700000	29200000	30100000	29700000	0.78:0.63:0.31:2.11:1.00:0.80:0.74:1.61:54.38:51.61:53.28:52.64	722000	648000	29900000	1.11:1.00:46.21	40490	Bradyrhizobiaceae	Rhodopseudomonas	Beta-ketodecanoyl-[acyl-carrier-protein] synthase OS=Rhodopseudomonas faecalis OX=99655 GN=BJ122_103202 PE=4 SV=1
1326	4534	tr|A3WVK8|A3WVK8_9BRAD	49.43	27	10	2	4860000	6410000	6860000	4970000	3950000	4530000	4430000	4480000	30600000	40000000	28100000	29800000	1.23:1.62:1.74:1.26:1.00:1.15:1.12:1.14:7.75:10.13:7.13:7.54	5890000	4350000	32100000	1.36:1.00:7.39	45441	Bradyrhizobiaceae	Nitrobacter	Isocitrate dehydrogenase [NADP] OS=Nitrobacter sp. Nb-311A OX=314253 GN=NB311A_01380 PE=3 SV=1
5297	57915	tr|A0A2T4JBE7|A0A2T4JBE7_RHOBL	46.84	12	2	2	3770000	4830000	1990000	3710000	366000	459000	861000	747000	30400000	35700000	23600000	26800000	10.29:13.18:5.43:10.14:1.00:1.25:2.35:2.04:64.00:64.00:64.00:64.00	3570000	738000	29100000	4.85:1.00:39.49	23981	Rhodobacteraceae	Rhodobacter	Invasion associated locus B family protein OS=Rhodobacter blasticus DSM 2131 OX=1188250 GN=C5F44_07350 PE=4 SV=1
1993	21619	tr|A0A318T7D8|A0A318T7D8_9BRAD	57.86	13	4	4	1040000	1260000	830000	1470000	1950000	2370000	1900000	2290000	30300000	31200000	23600000	22800000	0.53:0.65:0.43:0.76:1.00:1.22:0.98:1.18:15.55:16.04:12.14:11.70	1330000	2690000	28800000	0.49:1.00:10.70	42599	Bradyrhizobiaceae	Rhodopseudomonas	Acetylornithine aminotransferase OS=Rhodopseudomonas faecalis OX=99655 GN=argD PE=3 SV=1
1575	3569	tr|A0A4R3N2F3|A0A4R3N2F3_9GAMM	31.99	37	6	6	17600000	18000000	14000000	15400000	16100000	16500000	25200000	24700000	30200000	42300000	36400000	38700000	1.09:1.12:0.87:0.95:1.00:1.03:1.57:1.53:1.88:2.63:2.26:2.41	16900000	21000000	36900000	0.80:1.00:1.76	27938	Chromatiaceae	Thiobaca	Uncharacterized protein OS=Thiobaca trueperi OX=127458 GN=EDC35_103235 PE=4 SV=1
1581	22491	tr|A0A318TBN6|A0A318TBN6_9BRAD	19.48	17	6	6	14400000	16600000	4210000	10600000	2780000	2740000	9160000	8350000	30100000	32000000	24500000	25000000	5.17:5.98:1.51:3.82:1.00:0.98:3.29:3.00:10.82:11.51:8.81:8.98	11500000	6050000	27900000	1.90:1.00:4.62	61413	Bradyrhizobiaceae	Rhodopseudomonas	Long-chain acyl-CoA synthetase OS=Rhodopseudomonas faecalis OX=99655 GN=BJ122_11535 PE=4 SV=1
1647	22504	tr|A0A5M6I3S4|A0A5M6I3S4_9RHIZ	58.84	18	7	2	633000	795000	839000	489000	8740000	11300000	7660000	7440000	30100000	28200000	36900000	34800000	0.07:0.09:0.10:0.06:1.00:1.29:0.88:0.85:3.45:3.22:4.22:3.98	712000	8780000	32500000	0.08:1.00:3.70	43515	Blastochloridaceae	Blastochloris	Dihydrolipoyllysine-residue succinyltransferase component of 2-oxoglutarate dehydrogenase complex OS=Blastochloris sulfoviridis OX=50712 GN=odhB PE=3 SV=1
1289	21711	tr|A0A5M6I533|A0A5M6I533_9RHIZ	37.69	16	7	6	5600000	4880000	8480000	6040000	14800000	12100000	15500000	15200000	30000000	28300000	24200000	22800000	0.38:0.33:0.57:0.41:1.00:0.82:1.05:1.03:2.03:1.91:1.64:1.54	7040000	14700000	26300000	0.48:1.00:1.79	72046	Blastochloridaceae	Blastochloris	Protein meaA OS=Blastochloris sulfoviridis OX=50712 GN=F1193_01380 PE=4 SV=1
178	20696	tr|A0A318TA32|A0A318TA32_9BRAD	70.01	22	17	5	2400000	2150000	2380000	2610000	2670000	2110000	2720000	2150000	29900000	28100000	28500000	27400000	0.90:0.80:0.89:0.98:1.00:0.79:1.02:0.80:11.18:10.53:10.67:10.24	2380000	2410000	28500000	0.99:1.00:11.80	106064	Bradyrhizobiaceae	Rhodopseudomonas	Protein translocase subunit SecA OS=Rhodopseudomonas faecalis OX=99655 GN=secA PE=3 SV=1
786	21022	tr|A0A5M6HUP5|A0A5M6HUP5_9RHIZ	48.61	30	11	10	102000000	122000000	96600000	98400000	143000000	147000000	155000000	148000000	29900000	31300000	29000000	23700000	0.71:0.85:0.67:0.69:1.00:1.03:1.08:1.03:0.21:0.22:0.20:0.17	105000000	149000000	28500000	0.71:1.00:0.19	53496	Blastochloridaceae	Blastochloris	Tryptophanase OS=Blastochloris sulfoviridis OX=50712 GN=F1193_11640 PE=3 SV=1
2924	27655	tr|A0A327KUE7|A0A327KUE7_9RHIZ	45.01	45	5	5	5660000	5230000	7510000	7510000	19800000	20700000	25900000	23400000	29900000	39100000	32000000	33100000	0.29:0.26:0.38:0.38:1.00:1.05:1.31:1.18:1.51:1.98:1.62:1.67	6480000	22400000	33500000	0.29:1.00:1.49	13970	0	0	30S ribosomal protein S12 OS=Rhodoplanes elegans OX=29408 GN=rpsL PE=3 SV=1 30S ribosomal protein S12 OS=Rhodovulum sp. PH10 OX=1187851 GN=rpsL PE=3 SV=1
2023	23202	tr|A0A318TJU8|A0A318TJU8_9BRAD	39.75	25	6	3	7170000	5630000	8370000	7110000	2780000	3260000	514000	1600000	29800000	24800000	22500000	24500000	2.58:2.02:3.01:2.56:1.00:1.17:0.18:0.57:10.70:8.91:8.09:8.80	7370000	2330000	25400000	3.16:1.00:10.89	27824	Bradyrhizobiaceae	Rhodopseudomonas	4-hydroxy-tetrahydrodipicolinate reductase OS=Rhodopseudomonas faecalis OX=99655 GN=dapB PE=3 SV=1
4731	27919	tr|A0A348FVZ1|A0A348FVZ1_9RHIZ	10.02	19	2	2	718000	31800	0	0	2350000	5620000	78900	156000	29800000	22300000	26800000	27700000	0.31:0.02:0:0:1.00:2.39:0.03:0.07:12.64:9.49:11.40:11.77	750000	2310000	26700000	0.32:1.00:11.54	16338	Blastochloridaceae	Blastochloris	3-hydroxybutyryl-CoA dehydratase OS=Blastochloris tepida OX=2233851 GN=BLTE_01590 PE=4 SV=1
1176	21106	tr|A0A318TDP3|A0A318TDP3_9BRAD	22.6	27	10	9	24700000	17500000	17100000	13900000	12000000	11000000	5830000	8520000	29700000	23800000	20900000	29700000	2.05:1.46:1.42:1.15:1.00:0.92:0.49:0.71:2.47:1.98:1.74:2.47	18300000	9340000	26000000	1.96:1.00:2.79	48038	Bradyrhizobiaceae	Rhodopseudomonas	Putative membrane-anchored protein OS=Rhodopseudomonas faecalis OX=99655 GN=BJ122_11093 PE=4 SV=1
3458	25468	tr|A0A318TQX2|A0A318TQX2_9BRAD	34.12	19	3	3	697000	4870000	776000	603000	813000	1230000	1570000	964000	29600000	26000000	25200000	10500000	0.86:5.99:0.95:0.74:1.00:1.52:1.92:1.19:36.37:32.03:30.98:12.89	1740000	1210000	23200000	1.44:1.00:19.22	28779	Bradyrhizobiaceae	Rhodopseudomonas	Uncharacterized protein OS=Rhodopseudomonas faecalis OX=99655 GN=BJ122_11559 PE=4 SV=1
418	21162	tr|A0A318TIJ1|A0A318TIJ1_9BRAD	14.3	35	17	10	9590000	10200000	11100000	11800000	20900000	16100000	13300000	12200000	29400000	25100000	14900000	13500000	0.46:0.49:0.53:0.56:1.00:0.77:0.64:0.58:1.41:1.20:0.72:0.65	10700000	17300000	22900000	0.62:1.00:1.32	47177	Bradyrhizobiaceae	Rhodopseudomonas	Glucose-1-phosphate adenylyltransferase OS=Rhodopseudomonas faecalis OX=99655 GN=glgC PE=3 SV=1
993	20918	tr|A0A318TQ41|A0A318TQ41_9BRAD	39.11	27	12	6	3490000	5030000	2700000	2030000	1190000	1050000	1790000	2540000	29400000	23000000	23600000	23700000	2.94:4.24:2.27:1.71:1.00:0.89:1.51:2.14:24.75:19.41:19.92:19.98	3520000	2130000	24900000	1.65:1.00:11.69	64992	Bradyrhizobiaceae	Rhodopseudomonas	Dihydroxy-acid dehydratase OS=Rhodopseudomonas faecalis OX=99655 GN=ilvD PE=3 SV=1
2337	22385	tr|A0A5M6I453|A0A5M6I453_9RHIZ	49.01	21	6	6	110000000	119000000	95800000	97700000	47800000	44600000	64200000	66300000	29400000	27400000	30500000	27600000	2.29:2.49:2.00:2.05:1.00:0.93:1.34:1.39:0.61:0.57:0.64:0.58	106000000	55800000	32100000	1.91:1.00:0.57	39612	Blastochloridaceae	Blastochloris	Efflux RND transporter periplasmic adaptor subunit OS=Blastochloris sulfoviridis OX=50712 GN=F1193_05335 PE=3 SV=1
220	20623	tr|A0A318TF87|A0A318TF87_9BRAD	32.47	32	16	5	671000	2090000	433000	450000	798000	650000	111000	435000	29200000	27200000	26300000	26000000	0.84:2.61:0.54:0.56:1.00:0.81:0.14:0.54:36.53:34.12:32.93:32.63	964000	537000	27200000	1.79:1.00:50.58	73154	Bradyrhizobiaceae	Rhodopseudomonas	Propionyl-CoA carboxylase OS=Rhodopseudomonas faecalis OX=99655 GN=BJ122_10729 PE=4 SV=1
2920	25700	tr|A0A5M6HJA5|A0A5M6HJA5_9RHIZ	39.49	31	4	4	3130000	3270000	3120000	1550000	21900000	24200000	40300000	34000000	29200000	37300000	29900000	22000000	0.14:0.15:0.14:0.07:1.00:1.10:1.84:1.55:1.33:1.70:1.36:1.00	2770000	34800000	29600000	0.08:1.00:0.85	23767	Blastochloridaceae	Blastochloris	Elongation factor P OS=Blastochloris sulfoviridis OX=50712 GN=efp PE=3 SV=1
2010	2483	tr|A0A4R3N0W4|A0A4R3N0W4_9GAMM	3.55	46	7	5	33600000	41800000	47800000	43100000	29100000	22100000	47800000	39800000	29100000	48200000	38000000	28600000	1.15:1.44:1.64:1.48:1.00:0.76:1.64:1.36:1.00:1.65:1.31:0.98	41600000	34700000	36100000	1.20:1.00:1.04	23034	Chromatiaceae	Thiobaca	Phospholipid transport system substrate-binding protein OS=Thiobaca trueperi OX=127458 GN=EDC35_106176 PE=4 SV=1
2340	22710	tr|A0A318TIK2|A0A318TIK2_9BRAD	39.67	37	7	7	7760000	8470000	9470000	8700000	6390000	5990000	6560000	6590000	29100000	47500000	52300000	49700000	1.21:1.32:1.48:1.36:1.00:0.94:1.03:1.03:4.55:7.44:8.18:7.77	8950000	6530000	54200000	1.37:1.00:8.30	38089	Bradyrhizobiaceae	Rhodopseudomonas	HlyD family secretion protein OS=Rhodopseudomonas faecalis OX=99655 GN=BJ122_10939 PE=4 SV=1
575	20754	tr|A0A348FXD9|A0A348FXD9_9RHIZ	37.83	27	14	6	4200000	4300000	2700000	2140000	12800000	13600000	15400000	18600000	28800000	30300000	25200000	29700000	0.33:0.33:0.21:0.17:1.00:1.06:1.20:1.45:2.24:2.36:1.96:2.31	3440000	15100000	28500000	0.23:1.00:1.89	79632	Blastochloridaceae	Blastochloris	Catalase-peroxidase OS=Blastochloris tepida OX=2233851 GN=katG1 PE=3 SV=1
1019	21176	tr|A0A5M6I6J1|A0A5M6I6J1_9RHIZ	30.01	31	10	4	0	1400000	566000	1060000	8170000	8940000	7170000	9090000	28800000	27200000	18700000	21300000	0:0.17:0.07:0.13:1.00:1.09:0.88:1.11:3.52:3.33:2.29:2.60	1380000	9410000	24400000	0.15:1.00:2.59	26335	Blastochloridaceae	Blastochloris	Electron transfer flavoprotein subunit beta/FixA family protein OS=Blastochloris sulfoviridis OX=50712 GN=F1193_01550 PE=3 SV=1
3463	27668	tr|A0A348FYQ3|A0A348FYQ3_9RHIZ	29.04	52	5	5	2160000	1490000	1110000	668000	11500000	9390000	11600000	10200000	28800000	20100000	16300000	15000000	0.19:0.13:0.10:0.06:1.00:0.81:1.00:0.88:2.50:1.74:1.42:1.30	1420000	10700000	23500000	0.13:1.00:2.21	14398	Blastochloridaceae	Blastochloris	DNA-directed RNA polymerase subunit omega OS=Blastochloris tepida OX=2233851 GN=rpoZ PE=3 SV=1
1009	21105	tr|A0A318TZA8|A0A318TZA8_9BRAD	38.96	38	8	6	694000	1220000	1450000	513000	8230000	2400000	4030000	6620000	28500000	37100000	22300000	32400000	0.08:0.15:0.18:0.06:1.00:0.29:0.49:0.80:3.46:4.50:2.71:3.94	1180000	5320000	32700000	0.22:1.00:6.14	35202	Bradyrhizobiaceae	Rhodopseudomonas	2-dehydropantoate 2-reductase OS=Rhodopseudomonas faecalis OX=99655 GN=BJ122_102195 PE=3 SV=1
2908	23749	tr|A0A318TKK6|A0A318TKK6_9BRAD	45.59	17	4	3	1910000	2490000	1570000	1690000	902000	1500000	794000	1160000	28300000	24400000	20800000	13900000	2.12:2.76:1.74:1.87:1.00:1.67:0.88:1.29:31.43:27.11:23.04:15.43	1960000	1400000	22400000	1.39:1.00:15.97	29041	Bradyrhizobiaceae	Rhodopseudomonas	Lytic murein transglycosylase OS=Rhodopseudomonas faecalis OX=99655 GN=BJ122_1039 PE=4 SV=1
2740	23451	tr|A0A318TLZ9|A0A318TLZ9_9BRAD	28.43	24	6	6	135000	1100000	39100	669000	1370000	705000	210000	206000	28200000	28100000	17300000	17100000	0.10:0.80:0.03:0.49:1.00:0.51:0.15:0.15:20.53:20.46:12.60:12.43	1100000	947000	22700000	1.16:1.00:23.95	29369	Bradyrhizobiaceae	Rhodopseudomonas	Indole-3-glycerol phosphate synthase OS=Rhodopseudomonas faecalis OX=99655 GN=trpC PE=3 SV=1
4032	60809	tr|A0A7W3UB71|A0A7W3UB71_RHOPL	40.06	15	5	2	3070000	2140000	2760000	1250000	1110000	2930000	1390000	1340000	28200000	19500000	18000000	21400000	2.78:1.94:2.49:1.13:1.00:2.65:1.26:1.22:25.52:17.61:16.25:19.32	2310000	1690000	21800000	1.36:1.00:12.85	23728	Bradyrhizobiaceae	Rhodopseudomonas	ATP-dependent Clp protease proteolytic subunit OS=Rhodopseudomonas palustris OX=1076 GN=HUU61_13090 PE=4 SV=1
274	3079	tr|A0A348G1Y5|A0A348G1Y5_9RHIZ	32.35	12	16	5	3460000	2540000	981000	1340000	16700000	15200000	16500000	17100000	28100000	28200000	26300000	22300000	0.21:0.15:0.06:0.08:1.00:0.91:0.99:1.03:1.68:1.69:1.58:1.34	2330000	16400000	26300000	0.14:1.00:1.60	172540	Blastochloridaceae	Blastochloris	Glutamate synthase OS=Blastochloris tepida OX=2233851 GN=gltB PE=3 SV=1
2846	23837	tr|A0A0H5BAB9|A0A0H5BAB9_BLAVI	39.6	18	5	5	577000	997000	755000	1050000	3580000	2810000	16800000	16400000	28000000	26600000	74200000	33000000	0.16:0.28:0.21:0.29:1.00:0.79:4.70:4.59:7.82:7.43:20.71:9.21	890000	11800000	40400000	0.08:1.00:3.44	27644	Blastochloridaceae	Blastochloris	Transaldolase OS=Blastochloris viridis OX=1079 GN=tal PE=4 SV=1
940	2321	tr|A0A0H5BI47|A0A0H5BI47_BLAVI	20.68	28	8	2	497000	0	0	281000	5520000	6410000	0	32800	27900000	25600000	26800000	14800000	0.09:0:0:0.05:1.00:1.16:0:0.02:5.05:4.65:4.86:2.69	401000	3990000	23800000	0.10:1.00:5.97	39053	Blastochloridaceae	Blastochloris	Branched-chain amino acid ABC transporter OS=Blastochloris viridis OX=1079 GN=braC_2 PE=3 SV=1
1471	52495	tr|A0A5B9YN88|A0A5B9YN88_9SPHN	13.42	31	7	2	5590000	4930000	215000	1610000	65800	0	2840000	2830000	27900000	24900000	33100000	37700000	64.00:64.00:3.26:24.39:1.00:0:43.13:43.04:64.00:64.00:64.00:64.00	4110000	2720000	30900000	1.51:1.00:11.37	49466	Sphingomonadaceae	Sphingomonas	Glutamate dehydrogenase OS=Sphingomonas sp. C8-2 OX=2492837 GN=EIK56_08110 PE=3 SV=1
2390	22518	tr|A0A318TL13|A0A318TL13_9BRAD	12.71	37	7	7	26200000	24100000	31500000	28100000	41300000	35900000	29300000	31600000	27900000	27100000	23000000	21500000	0.63:0.58:0.76:0.68:1.00:0.87:0.71:0.77:0.68:0.66:0.56:0.52	27500000	34800000	24900000	0.79:1.00:0.72	27707	Bradyrhizobiaceae	Rhodopseudomonas	Amino acid/amide ABC transporter ATP-binding protein 1 (HAAT family) OS=Rhodopseudomonas faecalis OX=99655 GN=BJ122_103171 PE=4 SV=1
104	13524	tr|A0A0H5BI02|A0A0H5BI02_BLAVI	29.63	29	19	8	2350000	2490000	546000	1210000	13900000	15100000	17600000	18100000	27800000	28900000	21000000	22500000	0.17:0.18:0.04:0.09:1.00:1.09:1.26:1.30:2.00:2.07:1.51:1.62	1840000	16200000	25100000	0.11:1.00:1.55	103433	Blastochloridaceae	Blastochloris	Glutamate synthase [NADPH] small chain OS=Blastochloris viridis OX=1079 GN=gltD_1 PE=4 SV=1
1198	23633	tr|A0A318TEY8|A0A318TEY8_9BRAD	46.67	37	9	9	2230000	3320000	5840000	2550000	3740000	4150000	2750000	3560000	27700000	29900000	31300000	27600000	0.60:0.89:1.56:0.68:1.00:1.11:0.74:0.95:7.41:7.99:8.37:7.38	3670000	3860000	30500000	0.95:1.00:7.91	27195	Bradyrhizobiaceae	Rhodopseudomonas	HAMP domain-containing protein OS=Rhodopseudomonas faecalis OX=99655 GN=BJ122_11271 PE=4 SV=1
2300	23086	tr|A0A5M6I3Y2|A0A5M6I3Y2_9RHIZ	35.84	16	5	5	2600000	2870000	1050000	1920000	6460000	6130000	10500000	6750000	27700000	30300000	29600000	28900000	0.40:0.44:0.16:0.30:1.00:0.95:1.63:1.04:4.28:4.69:4.58:4.47	2250000	7750000	29100000	0.29:1.00:3.76	45404	Blastochloridaceae	Blastochloris	Glucose-6-phosphate isomerase OS=Blastochloris sulfoviridis OX=50712 GN=F1193_04890 PE=3 SV=1
3387	25167	tr|A0A318THE7|A0A318THE7_9BRAD	49.03	33	4	3	3220000	3200000	1520000	1730000	922000	1110000	1600000	1430000	27500000	24700000	22600000	21100000	3.50:3.47:1.65:1.87:1.00:1.20:1.73:1.55:29.85:26.76:24.47:22.92	2510000	1490000	24000000	1.68:1.00:16.07	17827	Bradyrhizobiaceae	Rhodopseudomonas	Single-stranded DNA-binding protein OS=Rhodopseudomonas faecalis OX=99655 GN=BJ122_105161 PE=3 SV=1
4240	55911	tr|A0A2U8WE83|A0A2U8WE83_9RHIZ	11.34	17	4	2	5950000	6230000	6780000	16800000	15200000	14200000	22400000	35400000	27500000	28700000	13100000	11900000	0.39:0.41:0.45:1.11:1.00:0.93:1.48:2.33:1.82:1.89:0.86:0.78	8950000	21800000	20300000	0.41:1.00:0.93	39203	Methylobacteriaceae	Methylobacterium	Branched chain amino acid ABC transporter substrate-binding protein OS=Methylobacterium durans OX=2202825 GN=DK389_07005 PE=3 SV=1
1406	22105	tr|A0A5M6I5M9|A0A5M6I5M9_9RHIZ	23.47	28	7	6	729000	4110000	439000	425000	12400000	11800000	17500000	16400000	27400000	31000000	20900000	17400000	0.06:0.33:0.04:0.03:1.00:0.95:1.41:1.32:2.20:2.49:1.69:1.40	1540000	14500000	24200000	0.11:1.00:1.66	44184	Blastochloridaceae	Blastochloris	5-aminolevulinate synthase OS=Blastochloris sulfoviridis OX=50712 GN=hemA PE=3 SV=1
3115	4282	tr|A0A5M6I570|A0A5M6I570_9RHIZ	42.81	15	5	4	6460000	6430000	7590000	5620000	11600000	10400000	15600000	11300000	27400000	23500000	20900000	20000000	0.56:0.56:0.66:0.49:1.00:0.90:1.35:0.98:2.37:2.04:1.81:1.73	6520000	12200000	22900000	0.53:1.00:1.88	40966	Blastochloridaceae	Blastochloris	Phosphoglycerate kinase OS=Blastochloris sulfoviridis OX=50712 GN=pgk PE=3 SV=1
414	20925	tr|A0A318TJ25|A0A318TJ25_9BRAD	47.6	21	15	15	6180000	7830000	5850000	7410000	9510000	8860000	9550000	10600000	27200000	21600000	24500000	26400000	0.65:0.82:0.62:0.78:1.00:0.93:1.00:1.11:2.86:2.27:2.58:2.78	6820000	9640000	26300000	0.71:1.00:2.73	91611	Bradyrhizobiaceae	Rhodopseudomonas	SSD domain-containing protein OS=Rhodopseudomonas faecalis OX=99655 GN=BJ122_10296 PE=4 SV=1
3213	54744	tr|A0A2T0PIE2|A0A2T0PIE2_RHITR	54.92	24	4	3	2810000	2910000	2420000	2950000	2350000	2540000	2540000	2500000	27200000	34200000	26000000	24900000	1.19:1.24:1.03:1.25:1.00:1.08:1.08:1.06:11.55:14.55:11.05:10.61	2860000	2480000	28100000	1.15:1.00:11.31	20025	Rhizobiaceae	Rhizobium	50S ribosomal protein L10 OS=Rhizobium tropici OX=398 GN=rplJ PE=3 SV=1
4216	55053	tr|A0A2T4JET7|A0A2T4JET7_RHOBL	49.33	29	3	3	8170000	8690000	2910000	4960000	1040000	1160000	1160000	1370000	27100000	16000000	23200000	20800000	7.88:8.38:2.81:4.78:1.00:1.11:1.12:1.32:26.16:15.42:22.33:20.05	6900000	1440000	21800000	4.79:1.00:15.15	14780	Rhodobacteraceae	Rhodobacter	Organic hydroperoxide resistance protein OS=Rhodobacter blasticus DSM 2131 OX=1188250 GN=C5F44_00155 PE=3 SV=1
2290	3510	tr|G2DXE4|G2DXE4_9GAMM	27.8	12	6	3	1650000	1670000	5240000	5360000	1540000	2470000	3050000	3490000	27000000	10700000	24900000	16000000	1.07:1.09:3.41:3.49:1.00:1.61:1.98:2.27:17.58:6.93:16.21:10.41	3960000	2640000	19700000	1.50:1.00:7.46	66810	Chromatiaceae	Thiorhodococcus	Aspartate--tRNA(Asp/Asn) ligase OS=Thiorhodococcus drewsii AZ1 OX=765913 GN=aspS PE=3 SV=1
4885	33975	tr|A0A318TCN1|A0A318TCN1_9BRAD	31.74	16	3	3	28600000	28700000	23400000	21200000	3430000	3270000	6310000	5660000	26700000	30200000	28700000	30400000	8.35:8.38:6.83:6.19:1.00:0.95:1.84:1.65:7.79:8.79:8.36:8.86	25500000	4710000	29000000	5.42:1.00:6.16	21193	Bradyrhizobiaceae	Rhodopseudomonas	Ribosome hibernation promoting factor OS=Rhodopseudomonas faecalis OX=99655 GN=hpf PE=3 SV=1
2840	23008	tr|A0A318U067|A0A318U067_9BRAD	32.04	15	5	5	2700000	3180000	781000	758000	743000	602000	1650000	1940000	26600000	28300000	27400000	24800000	3.64:4.28:1.05:1.02:1.00:0.81:2.22:2.61:35.84:38.11:36.93:33.34	2860000	1440000	26800000	1.98:1.00:18.54	45386	Bradyrhizobiaceae	Rhodopseudomonas	CubicO group peptidase (Beta-lactamase class C family) OS=Rhodopseudomonas faecalis OX=99655 GN=BJ122_10136 PE=4 SV=1
2698	4003	tr|A0A4R3MXF3|A0A4R3MXF3_9GAMM	25.4	9	3	3	56200000	56000000	40600000	51400000	35900000	34300000	35400000	44800000	26500000	27100000	30400000	31900000	1.57:1.56:1.13:1.43:1.00:0.96:0.99:1.25:0.74:0.76:0.85:0.89	57100000	40500000	29200000	1.41:1.00:0.72	43017	Chromatiaceae	Thiobaca	Beta-barrel assembly machine subunit BamC OS=Thiobaca trueperi OX=127458 GN=EDC35_104145 PE=4 SV=1
2958	24289	tr|A0A151FL99|A0A151FL99_9BRAD	28.5	26	7	2	1750000	1670000	770000	175000	146000	258000	1000000	932000	26400000	29100000	25900000	21800000	11.97:11.38:5.26:1.19:1.00:1.76:6.87:6.37:64.00:64.00:64.00:64.00	1440000	868000	25800000	1.66:1.00:29.75	32119	Bradyrhizobiaceae	Bradyrhizobium	Alpha-D-glucosyl-1-phosphate uridylyltransferase OS=Bradyrhizobium liaoningense OX=43992 GN=A1D31_09170 PE=3 SV=1
2800	28028	tr|A0A348G3S3|A0A348G3S3_9RHIZ	58.72	18	4	4	551000000	586000000	802000000	818000000	361000000	346000000	616000000	627000000	26300000	22700000	19500000	17000000	1.53:1.62:2.22:2.27:1.00:0.96:1.71:1.74:0.07:0.06:0.05:0.05	689000000	487000000	21400000	1.41:1.00:0.04	20182	Blastochloridaceae	Blastochloris	DUF1508 domain-containing protein OS=Blastochloris tepida OX=2233851 GN=BLTE_28910 PE=4 SV=1 DUF1508 domain-containing protein OS=Blastochloris sulfoviridis OX=50712 GN=F1193_03805 PE=4 SV=1
3978	24804	tr|A0A182D5S1|A0A182D5S1_BLAVI	29.41	15	5	3	393000	2470000	294000	15000	10800000	11000000	10400000	9840000	26100000	21200000	23400000	18500000	0.04:0.23:0.03:0.02:1.00:1.02:0.96:0.91:2.41:1.97:2.17:1.71	1520000	10500000	22300000	0.14:1.00:2.12	46362	Blastochloridaceae	Blastochloris	Serine hydroxymethyltransferase OS=Blastochloris viridis OX=1079 GN=glyA PE=3 SV=1
4722	27161	tr|A0A2H9V6I2|A0A2H9V6I2_9BRAD	44.68	19	3	2	1470000	1100000	790000	666000	1710000	1080000	428000	728000	26100000	28600000	21100000	29800000	0.86:0.64:0.46:0.39:1.00:0.63:0.25:0.43:15.28:16.74:12.37:17.47	1110000	1020000	26400000	1.09:1.00:25.91	19326	Bradyrhizobiaceae	Bradyrhizobium	Invasion protein IalB OS=Bradyrhizobium lablabi OX=722472 GN=BKA76_0645 PE=4 SV=1
4736	28033	tr|A0A318U0L4|A0A318U0L4_9BRAD	46.32	28	3	3	2120000	2330000	983000	1240000	3020000	2070000	1580000	2310000	26100000	26400000	24700000	18100000	0.70:0.77:0.33:0.41:1.00:0.69:0.52:0.77:8.64:8.74:8.20:6.00	2040000	3280000	23800000	0.62:1.00:7.27	14419	Bradyrhizobiaceae	Rhodopseudomonas	Methylmalonyl-CoA epimerase /ethylmalonyl-CoA epimerase OS=Rhodopseudomonas faecalis OX=99655 GN=BJ122_101202 PE=3 SV=1
737	21287	tr|A0A5M6I622|A0A5M6I622_9RHIZ	44.28	36	14	8	5770000	5160000	3920000	4210000	12400000	12000000	16500000	18300000	26000000	27000000	22800000	20300000	0.46:0.41:0.31:0.34:1.00:0.96:1.33:1.47:2.09:2.17:1.84:1.63	5140000	14800000	25800000	0.35:1.00:1.74	37328	Blastochloridaceae	Blastochloris	DNA-directed RNA polymerase subunit alpha OS=Blastochloris sulfoviridis OX=50712 GN=rpoA PE=3 SV=1
1994	22288	tr|A0A318TE07|A0A318TE07_9BRAD	34.5	35	6	6	539000	356000	226000	78300	57800	88100	206000	599000	25900000	28600000	20200000	21900000	9.33:6.17:3.91:1.35:1.00:1.53:3.57:10.36:64.00:64.00:64.00:64.00	300000	716000	24200000	0.42:1.00:33.73	38210	Bradyrhizobiaceae	Rhodopseudomonas	Phospholipid/cholesterol/gamma-HCH transport system substrate-binding protein OS=Rhodopseudomonas faecalis OX=99655 GN=BJ122_11567 PE=4 SV=1
2305	23927	tr|A0A6N8E0W7|A0A6N8E0W7_9RHIZ	30.89	16	6	3	491000	917000	364000	0	2780000	2680000	3850000	3420000	25900000	30600000	14500000	18400000	0.18:0.33:0.13:0:1.00:0.96:1.38:1.23:9.29:10.98:5.21:6.59	714000	3340000	23100000	0.21:1.00:6.94	37511	Hyphomicrobiaceae	Rhodoplanes	Aspartate-semialdehyde dehydrogenase OS=Rhodoplanes serenus OX=200615 GN=asd PE=3 SV=1
1194	21272	tr|A0A318TPD5|A0A318TPD5_9BRAD	28.78	20	9	4	2260000	2960000	3440000	2470000	5750000	4190000	5180000	1080000	25800000	28000000	26100000	11500000	0.39:0.51:0.60:0.43:1.00:0.73:0.90:0.19:4.48:4.87:4.54:2.00	2980000	5440000	25300000	0.55:1.00:4.65	65962	Bradyrhizobiaceae	Rhodopseudomonas	Glutamine--fructose-6-phosphate aminotransferase [isomerizing] OS=Rhodopseudomonas faecalis OX=99655 GN=glmS PE=3 SV=1
1704	52566	tr|A0A318TDG5|A0A318TDG5_9BRAD	35.94	41	5	3	1550000	2750000	1490000	2610000	966000	165000	1380000	3990000	25800000	26800000	28600000	26700000	1.61:2.85:1.54:2.70:1.00:0.17:1.43:4.13:26.70:27.75:29.62:27.68	2280000	1720000	27000000	1.33:1.00:15.72	18171	Bradyrhizobiaceae	Rhodopseudomonas	Peptidoglycan-associated protein OS=Rhodopseudomonas faecalis OX=99655 GN=pal PE=3 SV=1
3464	28472	tr|Q3SPG5|Q3SPG5_NITWN	30.06	44	5	3	2130000	5170000	5710000	5770000	1540000	2200000	1480000	4580000	25800000	25600000	26200000	24200000	1.39:3.37:3.72:3.76:1.00:1.43:0.96:2.98:16.79:16.68:17.08:15.78	5420000	2850000	25500000	1.90:1.00:8.93	10570	Bradyrhizobiaceae	Nitrobacter	10 kDa chaperonin OS=Nitrobacter winogradskyi (strain ATCC 25391 / DSM 10237 / CIP 104748 / NCIMB 11846 / Nb-255) OX=323098 GN=groS PE=3 SV=1
466	20787	tr|A0A318T9T6|A0A318T9T6_9BRAD	54.43	20	13	4	521000	1180000	283000	480000	614000	718000	969000	918000	25700000	18600000	17100000	22400000	0.85:1.92:0.46:0.78:1.00:1.17:1.58:1.50:41.96:30.27:27.92:36.47	1280000	1750000	24100000	0.73:1.00:13.75	95513	Bradyrhizobiaceae	Rhodopseudomonas	Translation initiation factor IF-2 OS=Rhodopseudomonas faecalis OX=99655 GN=infB PE=3 SV=1
1290	22195	tr|A0A0H5B6L4|A0A0H5B6L4_BLAVI	16.83	23	8	5	47200	1400000	0	80400	16600000	16400000	11400000	11200000	25700000	20400000	19000000	18000000	0.02:0.08:0:0.02:1.00:0.99:0.69:0.67:1.55:1.23:1.14:1.08	1040000	13900000	31100000	0.08:1.00:2.24	48929	Blastochloridaceae	Blastochloris	Tryptophan synthase beta chain OS=Blastochloris viridis OX=1079 GN=trpB_1 PE=3 SV=1
218	3032	tr|A0A0H5BFQ7|A0A0H5BFQ7_BLAVI	10.15	38	16	5	14800000	38100000	2860000	4750000	13300000	8040000	26400000	24400000	25600000	30800000	36300000	37700000	1.11:2.87:0.22:0.36:1.00:0.61:1.99:1.84:1.93:2.32:2.73:2.84	15200000	18100000	32700000	0.84:1.00:1.80	57599	Blastochloridaceae	Blastochloris	60 kDa chaperonin OS=Blastochloris viridis OX=1079 GN=groL3 PE=3 SV=1
2633	24528	tr|A0A318TUC7|A0A318TUC7_9BRAD	46.46	21	5	5	3840000	3840000	3390000	3800000	2390000	3240000	2640000	2800000	25600000	27100000	19900000	18600000	1.61:1.61:1.42:1.59:1.00:1.35:1.10:1.17:10.69:11.31:8.33:7.79	3820000	3010000	22800000	1.27:1.00:7.58	42731	Bradyrhizobiaceae	Rhodopseudomonas	1-deoxy-D-xylulose 5-phosphate reductoisomerase OS=Rhodopseudomonas faecalis OX=99655 GN=dxr PE=3 SV=1
2902	23298	tr|A0A318T973|A0A318T973_9BRAD	44.21	17	4	3	997000	1620000	696000	1210000	291000	222000	521000	98700	25600000	28000000	23200000	31500000	3.42:5.58:2.39:4.15:1.00:0.76:1.79:0.34:64.00:64.00:64.00:64.00	1130000	333000	27200000	3.40:1.00:64.00	41955	Bradyrhizobiaceae	Rhodopseudomonas	Flagellar biosynthesis protein FliO OS=Rhodopseudomonas faecalis OX=99655 GN=BJ122_12726 PE=4 SV=1
2465	24993	tr|A0A5M6HSQ5|A0A5M6HSQ5_9RHIZ	27.02	36	8	3	6200000	4080000	853000	1440000	6640000	8120000	11200000	10900000	25500000	25600000	23600000	20500000	0.93:0.62:0.13:0.22:1.00:1.22:1.69:1.65:3.85:3.85:3.55:3.08	4020000	9250000	23800000	0.43:1.00:2.57	23094	Blastochloridaceae	Blastochloris	ATP-dependent Clp protease proteolytic subunit OS=Blastochloris sulfoviridis OX=50712 GN=clpP PE=3 SV=1
4912	55425	tr|A0A318TED5|A0A318TED5_9BRAD	43.41	57	3	3	2050000	2610000	4150000	1720000	2880000	4680000	3090000	3940000	25400000	20000000	22200000	24500000	0.71:0.91:1.44:0.60:1.00:1.62:1.07:1.37:8.83:6.96:7.70:8.50	2880000	3720000	25200000	0.77:1.00:6.77	15212	Bradyrhizobiaceae	Rhodopseudomonas	Nucleotide-binding universal stress UspA family protein OS=Rhodopseudomonas faecalis OX=99655 GN=BJ122_12011 PE=3 SV=1
512	11613	tr|W3RNZ1|W3RNZ1_9BRAD	55.5	16	12	2	2380000	2390000	2160000	1890000	1880000	1020000	1220000	1130000	25300000	23700000	19200000	18400000	1.27:1.27:1.15:1.01:1.00:0.54:0.65:0.60:13.49:12.60:10.20:9.79	2210000	1310000	21600000	1.68:1.00:16.49	77364	Bradyrhizobiaceae	Afipia	Polyribonucleotide nucleotidyltransferase OS=Afipia sp. P52-10 OX=1429916 GN=pnp PE=3 SV=1
4202	52674	tr|A0A2T4J919|A0A2T4J919_RHOBL	22.05	16	4	4	8070000	7770000	2110000	1880000	1500000	1200000	1600000	7920000	25200000	30500000	20000000	21800000	5.39:5.18:1.41:1.26:1.00:0.80:1.07:5.29:16.82:20.33:13.35:14.52	5000000	3440000	25800000	1.45:1.00:7.49	31015	Rhodobacteraceae	Rhodobacter	DUF481 domain-containing protein OS=Rhodobacter blasticus DSM 2131 OX=1188250 GN=C5F44_10180 PE=4 SV=1
4031	57909	tr|A0A285U9X9|A0A285U9X9_9RHIZ	0	9	3	3	0	0	62800	0	0	0	0	0	25100000	25700000	19200000	14700000	-:-:64.00:-:-:-:-:-:64.00:64.00:64.00:64.00	62800	0	21200000	64.00:-:64.00	51372	Rhizobiaceae	Rhizobium	Uncharacterized protein OS=Rhizobium subbaraonis OX=908946 GN=SAMN05892877_105226 PE=4 SV=1
2807	51882	tr|A0A2T4J865|A0A2T4J865_RHOBL	32.1	33	5	5	11400000	16800000	9670000	11000000	3620000	3130000	6460000	5380000	25000000	33000000	21500000	20500000	3.15:4.64:2.67:3.03:1.00:0.86:1.79:1.49:6.93:9.13:5.96:5.67	12200000	4680000	25000000	2.61:1.00:5.34	26395	Rhodobacteraceae	Rhodobacter	Molybdate ABC transporter substrate-binding protein OS=Rhodobacter blasticus DSM 2131 OX=1188250 GN=modA PE=3 SV=1
1539	22174	tr|A0A336JU12|A0A336JU12_9BRAD	45.65	18	8	4	3350000	2800000	2090000	2170000	4790000	5140000	4670000	4510000	24900000	31600000	23400000	22500000	0.70:0.58:0.44:0.45:1.00:1.07:0.97:0.94:5.20:6.59:4.89:4.70	2600000	4780000	25600000	0.54:1.00:5.36	48907	Bradyrhizobiaceae	Rhodopseudomonas	S41A family C-terminal processing peptidase-3 OS=Rhodopseudomonas pentothenatexigens OX=999699 GN=SAMN05892882_12860 PE=3 SV=1
852	6105	tr|A0A318TDG0|A0A318TDG0_9BRAD	28.64	22	8	4	1980000	1090000	282000	0	1970000	1480000	1010000	734000	24700000	24600000	25300000	22200000	1.01:0.56:0.14:0:1.00:0.75:0.51:0.37:12.57:12.50:12.87:11.28	1780000	1630000	24600000	1.09:1.00:15.09	49824	Bradyrhizobiaceae	Rhodopseudomonas	Poly(3-hydroxybutyrate) depolymerase OS=Rhodopseudomonas faecalis OX=99655 GN=BJ122_12461 PE=4 SV=1
1642	2921	tr|A0A6I6EBX2|A0A6I6EBX2_THETI	31.02	30	9	6	50800000	54300000	49300000	35900000	63300000	56100000	89400000	86000000	24700000	23900000	28100000	28000000	0.80:0.86:0.78:0.57:1.00:0.89:1.41:1.36:0.39:0.38:0.44:0.44	47600000	73700000	26800000	0.65:1.00:0.36	37719	Chromatiaceae	Thermochromatium	Mg-protoporphyrin IX chelatase OS=Thermochromatium tepidum ATCC 43061 OX=316276 GN=bchI PE=3 SV=1
2463	24064	tr|A0A318TB67|A0A318TB67_9BRAD	34.08	26	7	7	15200000	14900000	11400000	12000000	11000000	11000000	13800000	14000000	24700000	26700000	23800000	21900000	1.38:1.35:1.04:1.09:1.00:1.00:1.26:1.28:2.25:2.43:2.16:1.99	13500000	12500000	24300000	1.09:1.00:1.95	40639	Bradyrhizobiaceae	Rhodopseudomonas	Nucleoside-diphosphate-sugar epimerase OS=Rhodopseudomonas faecalis OX=99655 GN=BJ122_13020 PE=4 SV=1
2844	23605	tr|Q07S06|Q07S06_RHOP5	43.24	19	6	6	1560000	2570000	1200000	1280000	649000	357000	1000000	1130000	24700000	20200000	15100000	17000000	2.40:3.95:1.85:1.97:1.00:0.55:1.55:1.74:38.01:31.15:23.29:26.14	2040000	958000	20100000	2.13:1.00:20.95	33371	Bradyrhizobiaceae	Rhodopseudomonas	Chlorophyll synthesis pathway BchC OS=Rhodopseudomonas palustris (strain BisA53) OX=316055 GN=RPE_1326 PE=4 SV=1
2917	24838	tr|A0A5M6I0G2|A0A5M6I0G2_9RHIZ	8.5	47	5	4	4640000	27300000	4290000	3980000	18600000	17600000	30800000	30200000	24700000	23300000	15600000	17200000	0.25:1.47:0.23:0.21:1.00:0.94:1.65:1.62:1.32:1.25:0.84:0.92	10200000	25300000	20200000	0.41:1.00:0.80	16955	Blastochloridaceae	Blastochloris	Peptidyl-prolyl cis-trans isomerase OS=Blastochloris sulfoviridis OX=50712 GN=F1193_09120 PE=3 SV=1
868	21021	tr|A0A318TAR1|A0A318TAR1_9BRAD	48.04	27	11	11	373000	476000	120000	871000	0	184000	111000	146000	24600000	21900000	49500000	49900000	64.00:64.00:64.00:64.00:-:64.00:64.00:64.00:64.00:64.00:64.00:64.00	482000	221000	48300000	2.18:1.00:64.00	49063	Bradyrhizobiaceae	Rhodopseudomonas	OOP family OmpA-OmpF porin OS=Rhodopseudomonas faecalis OX=99655 GN=BJ122_13810 PE=4 SV=1
2384	6407	tr|A0A348FVJ1|A0A348FVJ1_9RHIZ	17.82	46	7	7	7040000	2490000	466000	709000	1390000	1050000	6080000	8450000	24600000	17000000	20700000	19800000	5.08:1.79:0.34:0.51:1.00:0.76:4.39:6.10:17.73:12.29:14.93:14.27	2830000	6400000	20500000	0.44:1.00:3.21	19122	Blastochloridaceae	Blastochloris	N-acetyltransferase domain-containing protein OS=Blastochloris tepida OX=2233851 GN=BLTE_00090 PE=4 SV=1
3093	8852	tr|A0A318TI56|A0A318TI56_9BRAD	36.97	13	5	5	5380000	6070000	2330000	3760000	4230000	4510000	7510000	4850000	24500000	22000000	28700000	27400000	1.27:1.43:0.55:0.89:1.00:1.07:1.78:1.15:5.79:5.20:6.79:6.47	4380000	5550000	25600000	0.79:1.00:4.62	74163	Bradyrhizobiaceae	Rhodopseudomonas	Papain like protease OS=Rhodopseudomonas faecalis OX=99655 GN=BJ122_104111 PE=4 SV=1
3517	28960	tr|A0A5M6I6X7|A0A5M6I6X7_9RHIZ	27.67	47	5	4	51100000	41900000	54000000	50900000	44200000	43500000	57200000	54200000	24400000	32200000	30800000	29400000	1.16:0.95:1.22:1.15:1.00:0.98:1.29:1.23:0.55:0.73:0.70:0.67	49500000	53400000	29700000	0.93:1.00:0.56	11408	Blastochloridaceae	Blastochloris	50S ribosomal protein L24 OS=Blastochloris sulfoviridis OX=50712 GN=rplX PE=3 SV=1
4710	14225	tr|A0A336JU29|A0A336JU29_9BRAD	48.53	16	3	3	2780000	3630000	7210000	1820000	2360000	2200000	2100000	1710000	24400000	21800000	16000000	18800000	1.18:1.54:3.06:0.77:1.00:0.93:0.89:0.73:10.37:9.24:6.80:7.97	5480000	2470000	20400000	2.22:1.00:8.25	13733	Bradyrhizobiaceae	Rhodopseudomonas	50S ribosomal protein L21 OS=Rhodopseudomonas pentothenatexigens OX=999699 GN=rplU PE=3 SV=1 50S ribosomal protein L21 OS=Rhodopseudomonas palustris (strain BisB5) OX=316057 GN=rplU PE=3 SV=1
5498	9876	tr|A0A515KPB0|A0A515KPB0_9BRAD	55.08	16	2	2	2690000	2760000	1830000	1380000	1000000	985000	1110000	1600000	24400000	22200000	29900000	29800000	2.68:2.75:1.83:1.38:1.00:0.98:1.11:1.59:24.42:22.20:29.91:29.74	2160000	1170000	26600000	1.84:1.00:22.67	9939	Bradyrhizobiaceae	0	Accessory factor UbiK family protein OS=Tardiphaga sp. vice352 OX=2592816 GN=FNL55_21365 PE=4 SV=1 Accessory factor UbiK family protein OS=Bradyrhizobium sp. OX=376 GN=E8A46_20030 PE=4 SV=1
1674	22130	tr|A0A318TML2|A0A318TML2_9BRAD	36.23	29	8	8	2460000	611000	353000	435000	279000	93200	369000	379000	24200000	30200000	29300000	26700000	8.80:2.19:1.26:1.56:1.00:0.33:1.32:1.36:64.00:64.00:64.00:64.00	2680000	410000	27600000	6.55:1.00:64.00	44480	Bradyrhizobiaceae	Rhodopseudomonas	3-oxoacyl-[acyl-carrier-protein] synthase II OS=Rhodopseudomonas faecalis OX=99655 GN=BJ122_102326 PE=3 SV=1
4799	56467	tr|A0A2T0PIB9|A0A2T0PIB9_RHITR	45	17	3	3	3040000	3010000	11000000	8470000	3460000	3170000	2600000	2290000	24200000	20700000	22600000	17300000	0.88:0.87:3.16:2.44:1.00:0.91:0.75:0.66:7.00:5.98:6.52:5.00	6370000	3510000	21200000	1.81:1.00:6.05	14054	Rhizobiaceae	Rhizobium	50S ribosomal protein L22 OS=Rhizobium tropici OX=398 GN=rplV PE=3 SV=1
298	20611	tr|A0A318TAG2|A0A318TAG2_9BRAD	22.05	32	20	18	13700000	11400000	6920000	9720000	13500000	9790000	15800000	15100000	24100000	20500000	21300000	22000000	1.02:0.85:0.51:0.72:1.00:0.73:1.18:1.12:1.79:1.52:1.58:1.63	10400000	13900000	22000000	0.75:1.00:1.59	86178	Bradyrhizobiaceae	Rhodopseudomonas	Phenylalanine--tRNA ligase beta subunit OS=Rhodopseudomonas faecalis OX=99655 GN=pheT PE=3 SV=1
1676	22383	tr|A0A318TKK7|A0A318TKK7_9BRAD	38.26	18	7	4	1740000	2480000	2650000	3210000	13900000	12400000	8310000	6500000	24100000	23200000	21500000	22100000	0.13:0.18:0.19:0.23:1.00:0.89:0.60:0.47:1.73:1.67:1.54:1.59	2520000	10400000	22700000	0.24:1.00:2.20	55339	Bradyrhizobiaceae	Rhodopseudomonas	2-methylcitrate dehydratase OS=Rhodopseudomonas faecalis OX=99655 GN=BJ122_101150 PE=3 SV=1
355	20642	tr|A0A318TUS8|A0A318TUS8_9BRAD	22.1	44	14	6	3330000	170000	3630000	3460000	1720000	963000	4000000	4500000	23800000	27500000	21900000	23900000	1.93:0.10:2.11:2.01:1.00:0.56:2.32:2.61:13.83:16.00:12.71:13.87	2940000	2980000	24300000	0.98:1.00:8.14	52527	Bradyrhizobiaceae	Rhodopseudomonas	Inosine-5'-monophosphate dehydrogenase OS=Rhodopseudomonas faecalis OX=99655 GN=guaB PE=3 SV=1
2028	24230	tr|Q6N6Z8|Q6N6Z8_RHOPA	28.09	31	7	7	15100000	13300000	26900000	22700000	16300000	14400000	18100000	14500000	23800000	27900000	27500000	26500000	0.93:0.82:1.65:1.39:1.00:0.88:1.11:0.89:1.46:1.71:1.69:1.62	19700000	16700000	26600000	1.18:1.00:1.60	27404	Bradyrhizobiaceae	Rhodopseudomonas	SufC related to ABC transporter ATP-binding protein OS=Rhodopseudomonas palustris (strain ATCC BAA-98 / CGA009) OX=258594 GN=sufC PE=3 SV=1
3456	25076	tr|A0A5M6I6J5|A0A5M6I6J5_9RHIZ	74.96	20	5	4	2980000	3270000	2810000	3040000	13200000	12400000	11300000	12100000	23800000	23900000	26200000	22200000	0.23:0.25:0.21:0.23:1.00:0.94:0.85:0.92:1.80:1.81:1.98:1.68	3090000	12300000	24000000	0.25:1.00:1.96	30613	Blastochloridaceae	Blastochloris	NlpC/P60 family protein OS=Blastochloris sulfoviridis OX=50712 GN=F1193_01925 PE=3 SV=1
1711	22911	tr|A0A5M6I3R6|A0A5M6I3R6_9RHIZ	53.11	21	8	5	470000	336000	302000	228000	7170000	9180000	8950000	10100000	23700000	22700000	24400000	21000000	0.07:0.05:0.04:0.03:1.00:1.28:1.25:1.40:3.31:3.17:3.41:2.93	389000	9090000	28000000	0.04:1.00:3.09	48351	Blastochloridaceae	Blastochloris	Dihydrolipoyl dehydrogenase OS=Blastochloris sulfoviridis OX=50712 GN=F1193_05975 PE=3 SV=1
3671	29809	tr|B6JBG4|B6JBG4_OLICO	2.67	10	3	2	9580000	10900000	10900000	11000000	13100000	12100000	7690000	12200000	23700000	0	12300000	0	0.73:0.83:0.83:0.84:1.00:0.93:0.59:0.94:1.81:0:0.94:0	10600000	11300000	18000000	0.94:1.00:1.59	53111	Bradyrhizobiaceae	Afipia	Flagellin OS=Oligotropha carboxidovorans (strain ATCC 49405 / DSM 1227 / KCTC 32145 / OM5) OX=504832 GN=OCA5_c26050 PE=3 SV=1
812	3577	tr|A0A348FZJ5|A0A348FZJ5_9RHIZ	36.81	18	9	2	733000	256000	289000	72300	1250000	2610000	2840000	3180000	23600000	33000000	23700000	30000000	0.59:0.20:0.23:0.06:1.00:2.09:2.27:2.53:18.86:26.35:18.93:23.98	338000	2640000	27600000	0.13:1.00:10.46	48258	Blastochloridaceae	Blastochloris	NAD(P) transhydrogenase subunit beta OS=Blastochloris tepida OX=2233851 GN=pntB PE=3 SV=1
4154	9914	tr|A0A5M6HRM2|A0A5M6HRM2_9RHIZ	19.72	49	4	2	894000	63100	0	164000	10400000	10200000	16000000	15000000	23500000	21400000	22600000	14800000	0.09:0.02:0:0.02:1.00:0.98:1.54:1.45:2.27:2.06:2.18:1.43	620000	12900000	20600000	0.05:1.00:1.59	7494	Blastochloridaceae	Blastochloris	Cold-shock protein OS=Blastochloris sulfoviridis OX=50712 GN=F1193_14020 PE=4 SV=1
2044	23703	tr|A0A318TF55|A0A318TF55_9BRAD	29.81	64	6	6	636000	11400000	2300000	1120000	1080000	1230000	716000	286000	23400000	22300000	22800000	13900000	0.59:10.61:2.14:1.04:1.00:1.14:0.66:0.27:21.74:20.68:21.20:12.95	3870000	1080000	20600000	3.58:1.00:19.09	15625	Bradyrhizobiaceae	Rhodopseudomonas	Histidine triad (HIT) family protein OS=Rhodopseudomonas faecalis OX=99655 GN=BJ122_10758 PE=4 SV=1
2957	24202	tr|A0A318TRN0|A0A318TRN0_9BRAD	10.25	40	6	6	8760000	9130000	10200000	9850000	8730000	8200000	5440000	5710000	23400000	6350000	21400000	26600000	1.00:1.05:1.17:1.13:1.00:0.94:0.62:0.65:2.68:0.73:2.46:3.05	9650000	7120000	34500000	1.36:1.00:4.85	22420	Bradyrhizobiaceae	Rhodopseudomonas	Phage repressor protein C with HTH and peptisase S24 domain OS=Rhodopseudomonas faecalis OX=99655 GN=BJ122_103220 PE=4 SV=1
4197	32118	tr|A0A0H5B9B4|A0A0H5B9B4_BLAVI	27.78	38	3	3	982000	1050000	272000	1330000	5500000	7330000	25800000	9010000	23400000	29100000	21600000	23700000	0.18:0.19:0.05:0.24:1.00:1.33:4.69:1.64:4.26:5.28:3.93:4.30	1170000	13000000	24400000	0.09:1.00:1.88	12142	Blastochloridaceae	Blastochloris	Nitrogen regulatory protein P-II OS=Blastochloris viridis OX=1079 GN=glnK PE=3 SV=1
2344	23327	tr|A0A318T8F7|A0A318T8F7_9BRAD	59.86	25	5	5	462000	442000	348000	0	553000	776000	1060000	1100000	23300000	26000000	30800000	33800000	0.84:0.80:0.63:0:1.00:1.40:1.92:1.98:42.12:46.92:55.71:61.17	529000	1450000	30500000	0.37:1.00:21.09	39449	Bradyrhizobiaceae	Rhodopseudomonas	Histidinol-phosphate aminotransferase OS=Rhodopseudomonas faecalis OX=99655 GN=hisC PE=3 SV=1
4178	28209	tr|A0A318U0N5|A0A318U0N5_9BRAD	28.98	25	4	4	1710000	492000	1430000	1520000	361000	947000	1360000	11600	23200000	22400000	15500000	17900000	4.73:1.36:3.95:4.22:1.00:2.62:3.77:0.03:64.00:61.97:42.85:49.50	1440000	1220000	21900000	1.18:1.00:17.97	16676	Bradyrhizobiaceae	Rhodopseudomonas	3-hydroxyacyl-[acyl-carrier-protein] dehydratase FabZ OS=Rhodopseudomonas faecalis OX=99655 GN=fabZ PE=3 SV=1
1191	9417	tr|A0A182D000|A0A182D000_BLAVI	38.49	29	7	3	750000	419000	60300	647000	4030000	4180000	4080000	6530000	23100000	23900000	27200000	29100000	0.19:0.10:0.02:0.16:1.00:1.04:1.01:1.62:5.73:5.92:6.76:7.22	805000	4980000	25800000	0.16:1.00:5.18	32805	Blastochloridaceae	Blastochloris	Glutamate Aspartate periplasmic binding protein GltI OS=Blastochloris viridis OX=1079 GN=BV133_1085 PE=4 SV=1
2354	25811	tr|A0A0S3Q0L7|A0A0S3Q0L7_9BRAD	38.12	11	7	2	1710000	2690000	1260000	1340000	391000	481000	1320000	1310000	23100000	24000000	20700000	22400000	4.39:6.90:3.22:3.43:1.00:1.23:3.38:3.35:59.05:61.50:53.12:57.46	1800000	875000	22600000	2.06:1.00:25.79	63230	Bradyrhizobiaceae	Variibacter	30S ribosomal protein S1 OS=Variibacter gotjawalensis OX=1333996 GN=rpsA PE=3 SV=1
36	80	tr|A0A4R3N5Z7|A0A4R3N5Z7_9GAMM	41.09	19	30	21	38700000	37000000	37000000	35800000	21500000	20300000	23100000	20100000	23000000	22300000	17100000	13900000	1.80:1.72:1.72:1.67:1.00:0.95:1.07:0.93:1.07:1.04:0.80:0.65	37100000	21200000	19100000	1.75:1.00:0.90	196523	Chromatiaceae	Thiobaca	Uncharacterized protein OS=Thiobaca trueperi OX=127458 GN=EDC35_103338 PE=3 SV=1
456	20838	tr|Q6NB67|Q6NB67_RHOPA	23.63	22	13	3	6860000	8270000	2610000	5910000	4180000	4850000	4940000	4600000	22900000	23400000	55400000	58900000	1.64:1.98:0.62:1.42:1.00:1.16:1.18:1.10:5.48:5.59:13.27:14.11	7290000	4660000	46000000	1.56:1.00:9.86	65672	Bradyrhizobiaceae	Rhodopseudomonas	Hydrogenase large chain OS=Rhodopseudomonas palustris (strain ATCC BAA-98 / CGA009) OX=258594 GN=hupL PE=3 SV=1
855	22209	tr|A0A5M6HZN7|A0A5M6HZN7_9RHIZ	25.96	31	9	4	3650000	816000	1790000	2300000	8180000	7830000	13200000	18600000	22900000	27500000	23900000	24000000	0.45:0.10:0.22:0.28:1.00:0.96:1.62:2.27:2.80:3.36:2.92:2.94	2950000	11900000	24600000	0.25:1.00:2.06	35800	Blastochloridaceae	Blastochloris	30S ribosomal protein S2 OS=Blastochloris sulfoviridis OX=50712 GN=rpsB PE=3 SV=1
1996	22580	tr|A0A318TT13|A0A318TT13_9BRAD	21.41	33	6	6	6360000	6250000	6060000	7320000	8070000	5650000	7340000	7180000	22900000	14700000	19700000	11400000	0.79:0.77:0.75:0.91:1.00:0.70:0.91:0.89:2.83:1.82:2.45:1.42	6550000	7190000	19100000	0.91:1.00:2.66	25593	Bradyrhizobiaceae	Rhodopseudomonas	Mg-protoporphyrin IX methyltransferase OS=Rhodopseudomonas faecalis OX=99655 GN=BJ122_110136 PE=4 SV=1
2747	24705	tr|A0A6G7VCJ7|A0A6G7VCJ7_9GAMM	6.37	8	3	3	8130000	9460000	8610000	9540000	3860000	6980000	7740000	7670000	22900000	349000	0	534000	2.11:2.45:2.23:2.48:1.00:1.81:2.01:1.99:5.94:0.09:0:0.14	8940000	7440000	22900000	1.20:1.00:3.08	52308	Chromatiaceae	Caldichromatium	Biotin carboxylase OS=Chromatiaceae bacterium No.7 OX=2699430 GN=GWK36_06805 PE=4 SV=1
2345	23497	tr|A0A7W3UBK6|A0A7W3UBK6_RHOPL	9.05	14	4	3	4170000	3930000	158000	750000	4590000	631000	5640000	5860000	22800000	3440000	10900000	9480000	0.91:0.86:0.03:0.16:1.00:0.14:1.23:1.28:4.97:0.75:2.38:2.07	4090000	4960000	12700000	0.82:1.00:2.56	35191	Bradyrhizobiaceae	Rhodopseudomonas	Type I-C CRISPR-associated protein Cas7/Csd2 OS=Rhodopseudomonas palustris OX=1076 GN=cas7c PE=4 SV=1
3441	5065	tr|A0A318TIF7|A0A318TIF7_9BRAD	34.3	35	4	2	1850000	2200000	1410000	226000	864000	880000	328000	1200000	22700000	32200000	27000000	28700000	2.15:2.55:1.64:0.26:1.00:1.02:0.38:1.39:26.23:37.27:31.21:33.28	1420000	1090000	27600000	1.31:1.00:25.35	17887	Bradyrhizobiaceae	Rhodopseudomonas	Uncharacterized protein OS=Rhodopseudomonas faecalis OX=99655 GN=BJ122_103117 PE=4 SV=1
3513	27554	tr|A0A5M6I691|A0A5M6I691_9RHIZ	26.58	35	4	4	1340000	3250000	5000000	3640000	27500000	25500000	20900000	21300000	22700000	17500000	20600000	16700000	0.05:0.12:0.18:0.13:1.00:0.93:0.76:0.77:0.82:0.64:0.75:0.61	3870000	23800000	19500000	0.16:1.00:0.82	14626	Blastochloridaceae	Blastochloris	50S ribosomal protein L19 OS=Blastochloris sulfoviridis OX=50712 GN=rplS PE=3 SV=1
1017	678	tr|A0A4R3N4Q1|A0A4R3N4Q1_9GAMM	40.07	30	9	6	161000000	170000000	107000000	104000000	71000000	71000000	76200000	70700000	22600000	20700000	27200000	25400000	2.27:2.40:1.51:1.47:1.00:1.00:1.07:1.00:0.32:0.29:0.38:0.36	136000000	72200000	24100000	1.88:1.00:0.33	34314	Chromatiaceae	Thiobaca	Cysteine synthase OS=Thiobaca trueperi OX=127458 GN=EDC35_101470 PE=3 SV=1
4853	28392	tr|Q6N390|Q6N390_RHOPA	9.09	12	2	2	10800000	10700000	4350000	688000	9370000	190000	15600000	16400000	22600000	19600000	25000000	22600000	1.15:1.14:0.46:0.07:1.00:0.02:1.66:1.75:2.42:2.09:2.67:2.41	6620000	10400000	22400000	0.63:1.00:2.15	16028	Bradyrhizobiaceae	Rhodopseudomonas	Uncharacterized protein OS=Rhodopseudomonas palustris (strain ATCC BAA-98 / CGA009) OX=258594 GN=RPA3804 PE=4 SV=1
2915	24639	tr|A0A318T932|A0A318T932_9BRAD	19.29	28	4	4	5370000	6490000	3560000	2770000	3530000	9470000	4130000	4470000	22500000	21700000	10100000	11400000	1.52:1.84:1.01:0.78:1.00:2.69:1.17:1.27:6.37:6.16:2.86:3.24	4830000	5400000	16400000	0.89:1.00:3.04	26634	Bradyrhizobiaceae	Rhodopseudomonas	3-oxoacyl-[acyl-carrier protein] reductase OS=Rhodopseudomonas faecalis OX=99655 GN=BJ122_12527 PE=4 SV=1
438	3178	tr|A0A0H5BGQ7|A0A0H5BGQ7_BLAVI	13.43	20	13	4	5500000	6020000	1540000	0	9360000	8380000	14300000	15300000	22400000	17000000	16600000	16700000	0.59:0.64:0.16:0:1.00:0.89:1.52:1.64:2.39:1.82:1.77:1.79	4830000	11800000	18200000	0.41:1.00:1.54	96628	Blastochloridaceae	Blastochloris	Pyruvate phosphate dikinase OS=Blastochloris viridis OX=1079 GN=ppdK PE=3 SV=1
2014	3070	tr|A0A318TGU1|A0A318TGU1_9BRAD	33.99	27	8	8	3870000	4330000	2600000	1960000	1400000	1420000	3440000	3150000	22400000	21400000	23100000	24400000	2.78:3.10:1.87:1.40:1.00:1.02:2.47:2.26:16.05:15.33:16.59:17.46	3480000	2600000	22800000	1.34:1.00:8.78	40579	Bradyrhizobiaceae	Rhodopseudomonas	Pimeloyl-CoA dehydrogenase small subunit OS=Rhodopseudomonas faecalis OX=99655 GN=BJ122_1082 PE=3 SV=1
4511	28985	tr|A0A318T729|A0A318T729_9BRAD	29.95	30	3	3	72500000	64800000	35400000	29600000	5320000	4780000	5880000	6230000	22400000	19400000	14500000	8630000	13.65:12.18:6.67:5.57:1.00:0.90:1.11:1.17:4.22:3.66:2.73:1.62	50600000	5930000	18300000	8.53:1.00:3.09	16688	Bradyrhizobiaceae	Rhodopseudomonas	Carbon-monoxide dehydrogenase small subunit OS=Rhodopseudomonas faecalis OX=99655 GN=BJ122_13619 PE=4 SV=1
4859	28638	tr|A0A318TI31|A0A318TI31_9BRAD	30.98	18	3	3	1160000	31000	657000	51900	864000	426000	1840000	592000	22400000	20200000	19300000	29000000	1.34:0.04:0.76:0.06:1.00:0.49:2.13:0.68:25.90:23.39:22.36:33.60	817000	1100000	22700000	0.75:1.00:20.75	27576	Bradyrhizobiaceae	Rhodopseudomonas	Protein-disulfide isomerase OS=Rhodopseudomonas faecalis OX=99655 GN=BJ122_10668 PE=3 SV=1
483	3028	tr|A0A4R3N233|A0A4R3N233_9GAMM	11.28	10	12	5	24200000	23700000	23400000	22700000	26100000	26900000	27400000	23500000	22300000	23700000	22600000	23700000	0.93:0.91:0.90:0.87:1.00:1.03:1.05:0.90:0.85:0.91:0.87:0.91	23500000	26600000	24100000	0.88:1.00:0.90	140466	Chromatiaceae	Thiobaca	Phosphoribosylformylglycinamidine synthase OS=Thiobaca trueperi OX=127458 GN=purL PE=3 SV=1
2176	12302	tr|A0A348G2V2|A0A348G2V2_9RHIZ	15.27	31	6	5	27800000	33700000	63400000	6950000	90700000	85500000	30300000	68600000	22200000	22000000	21000000	10300000	0.31:0.37:0.70:0.08:1.00:0.94:0.33:0.76:0.24:0.24:0.23:0.11	33200000	68700000	21500000	0.48:1.00:0.31	35416	Blastochloridaceae	Blastochloris	Phosphate acetyltransferase OS=Blastochloris tepida OX=2233851 GN=pta PE=3 SV=1
4090	26061	tr|A0A348G312|A0A348G312_9RHIZ	25.16	15	3	3	501000	279000	0	0	1240000	1170000	761000	1400000	22100000	20900000	20800000	17700000	0.40:0.22:0:0:1.00:0.94:0.61:1.13:17.82:16.86:16.77:14.30	390000	1180000	20400000	0.33:1.00:17.30	43782	Blastochloridaceae	Blastochloris	Type I-U CRISPR-associated protein Cas7 OS=Blastochloris tepida OX=2233851 GN=csb1 PE=4 SV=1
819	21842	tr|W3RNA1|W3RNA1_9BRAD	31.49	19	8	2	8910000	3490000	9510000	9010000	5960000	6040000	7180000	8890000	22000000	15900000	21500000	19900000	1.50:0.59:1.60:1.51:1.00:1.01:1.21:1.49:3.70:2.66:3.62:3.35	7730000	7020000	19900000	1.10:1.00:2.84	48071	Bradyrhizobiaceae	Afipia	NAD(P) transhydrogenase subunit beta OS=Afipia sp. P52-10 OX=1429916 GN=X566_13805 PE=3 SV=1
1405	21510	tr|A0A318TFT1|A0A318TFT1_9BRAD	44.03	22	10	6	90800	0	52200	77300	550000	537000	617000	563000	22000000	27500000	18600000	17300000	0.17:0:0.10:0.14:1.00:0.98:1.12:1.02:40.09:50.05:33.77:31.50	220000	795000	21300000	0.28:1.00:26.85	72734	Bradyrhizobiaceae	Rhodopseudomonas	3-methylcrotonyl-CoA carboxylase alpha subunit OS=Rhodopseudomonas faecalis OX=99655 GN=BJ122_1063 PE=4 SV=1
1924	10998	Q07JJ7|GREA_RHOP5	20.33	42	6	3	10200000	12500000	7800000	9410000	3220000	2060000	15200000	10500000	22000000	19300000	25600000	15400000	3.16:3.87:2.42:2.92:1.00:0.64:4.71:3.25:6.81:6.00:7.94:4.79	9970000	7740000	20600000	1.29:1.00:2.66	17535	Bradyrhizobiaceae	Rhodopseudomonas	Transcription elongation factor GreA OS=Rhodopseudomonas palustris (strain BisA53) OX=316055 GN=greA PE=3 SV=1
3377	24101	tr|A0A5M6HIA8|A0A5M6HIA8_9RHIZ	37.18	27	5	3	4980000	4660000	3240000	3250000	16300000	15000000	25400000	22700000	22000000	25300000	23800000	21900000	0.31:0.29:0.20:0.20:1.00:0.92:1.56:1.40:1.35:1.55:1.46:1.35	4030000	19900000	23300000	0.20:1.00:1.17	20931	Blastochloridaceae	Blastochloris	50S ribosomal protein L9 OS=Blastochloris sulfoviridis OX=50712 GN=rplI PE=3 SV=1
2899	23077	tr|A0A318TV48|A0A318TV48_9BRAD	31.59	17	5	5	36800000	32100000	28900000	28300000	9340000	12100000	13800000	12300000	21900000	20000000	22900000	22500000	3.94:3.44:3.09:3.03:1.00:1.30:1.47:1.32:2.35:2.14:2.45:2.40	31500000	11900000	21800000	2.65:1.00:1.84	47181	Bradyrhizobiaceae	Rhodopseudomonas	Iron-regulated ABC transporter permease protein SufD OS=Rhodopseudomonas faecalis OX=99655 GN=BJ122_10650 PE=3 SV=1
3394	26430	tr|A0A318TUM5|A0A318TUM5_9BRAD	42.03	17	4	4	2550000	2310000	1180000	2010000	2370000	2240000	955000	2360000	21900000	19200000	26800000	27700000	1.07:0.97:0.50:0.85:1.00:0.94:0.40:0.99:9.24:8.10:11.28:11.65	2080000	1980000	23900000	1.05:1.00:12.06	23201	Bradyrhizobiaceae	Rhodopseudomonas	TPR_21 domain-containing protein OS=Rhodopseudomonas faecalis OX=99655 GN=BJ122_10793 PE=4 SV=1
3970	7726	tr|A0A5M6I4D8|A0A5M6I4D8_9RHIZ	51.47	25	4	4	2430000	3050000	2510000	2360000	8580000	9230000	9940000	13900000	21900000	19600000	17900000	14800000	0.28:0.36:0.29:0.27:1.00:1.08:1.16:1.62:2.55:2.28:2.09:1.72	2610000	10400000	18500000	0.25:1.00:1.78	12300	Blastochloridaceae	Blastochloris	DUF1476 domain-containing protein OS=Blastochloris sulfoviridis OX=50712 GN=F1193_04385 PE=4 SV=1
475	2687	tr|A0A348G2M7|A0A348G2M7_9RHIZ	68.13	39	17	4	4020000	4210000	3430000	3560000	29000000	34600000	32200000	34300000	21700000	24100000	26300000	24000000	0.14:0.15:0.12:0.12:1.00:1.19:1.11:1.18:0.75:0.83:0.91:0.83	4570000	33500000	24100000	0.14:1.00:0.72	42814	Blastochloridaceae	Blastochloris	Methionine adenosyltransferase OS=Blastochloris tepida OX=2233851 GN=metK PE=3 SV=1
4865	29037	tr|A0A5M6I1C2|A0A5M6I1C2_9RHIZ	26.06	37	3	3	9640000	9190000	11800000	12700000	18500000	4020000	12500000	11500000	21700000	18000000	22900000	22200000	0.52:0.50:0.64:0.69:1.00:0.22:0.67:0.62:1.17:0.97:1.24:1.20	11200000	11900000	21200000	0.94:1.00:1.78	12085	Blastochloridaceae	Blastochloris	Antibiotic biosynthesis monooxygenase OS=Blastochloris sulfoviridis OX=50712 GN=F1193_07420 PE=4 SV=1
4	1558	Q2IXS0|RPOB_RHOP2	34.57	36	43	4	1550000	1410000	1280000	1480000	1080000	668000	963000	1250000	21600000	19300000	9960000	12300000	1.44:1.31:1.19:1.37:1.00:0.62:0.89:1.16:20.04:17.96:9.26:11.47	1430000	988000	17900000	1.45:1.00:18.08	155045	Bradyrhizobiaceae	Rhodopseudomonas	DNA-directed RNA polymerase subunit beta OS=Rhodopseudomonas palustris (strain HaA2) OX=316058 GN=rpoB PE=3 SV=1
1557	23039	tr|A0A0H5BCC5|A0A0H5BCC5_BLAVI	43.97	20	5	2	1020000	428000	402000	415000	11500000	13200000	8870000	9470000	21600000	24400000	18900000	18300000	0.09:0.04:0.04:0.04:1.00:1.16:0.77:0.83:1.89:2.13:1.65:1.60	566000	10800000	20800000	0.05:1.00:1.93	37933	Blastochloridaceae	Blastochloris	Ferredoxin--NADP reductase OS=Blastochloris viridis OX=1079 GN=BV133_353 PE=3 SV=1
1645	21908	tr|A0A318TD48|A0A318TD48_9BRAD	8.19	13	6	5	6830000	11200000	16300000	17300000	15800000	17500000	27700000	31800000	21600000	23100000	21000000	20100000	0.43:0.71:1.03:1.10:1.00:1.11:1.76:2.02:1.37:1.47:1.34:1.27	12900000	23700000	21500000	0.54:1.00:0.90	68932	Bradyrhizobiaceae	Rhodopseudomonas	1-deoxy-D-xylulose-5-phosphate synthase OS=Rhodopseudomonas faecalis OX=99655 GN=dxs PE=3 SV=1
2022	22929	tr|A0A318T905|A0A318T905_9BRAD	39.07	13	6	4	1370000	3810000	4940000	4210000	2970000	3120000	4360000	4490000	21600000	21100000	17200000	16900000	0.46:1.28:1.66:1.42:1.00:1.05:1.46:1.51:7.27:7.08:5.78:5.67	3620000	3740000	19200000	0.97:1.00:5.13	61546	Bradyrhizobiaceae	Rhodopseudomonas	Flagellar basal body protein OS=Rhodopseudomonas faecalis OX=99655 GN=BJ122_1204 PE=3 SV=1
705	867	tr|A0A2K8U3L3|A0A2K8U3L3_9GAMM	16.43	25	8	4	17900000	45200000	45700000	44400000	133000000	127000000	75900000	71900000	21500000	24100000	18900000	1070000	0.13:0.34:0.34:0.33:1.00:0.96:0.57:0.54:0.16:0.18:0.14:0.02	38600000	102000000	16500000	0.38:1.00:0.16	45239	Chromatiaceae	Thiodictyon	Glutamate-1-semialdehyde 2 1-aminomutase OS=Candidatus Thiodictyon syntrophicum OX=1166950 GN=hemL PE=3 SV=1
4209	54621	tr|A0A4S3MMK4|A0A4S3MMK4_9RHOB	48.3	20	3	3	2210000	2590000	2460000	2550000	784000	1110000	2760000	1970000	21500000	17200000	20000000	15300000	2.82:3.31:3.14:3.26:1.00:1.41:3.51:2.52:27.41:21.89:25.45:19.49	2530000	1740000	22900000	1.46:1.00:13.21	21164	Rhodobacteraceae	Gemmobacter	Elongation factor P OS=Gemmobacter aestuarii OX=1445661 GN=efp PE=3 SV=1
2748	26031	tr|A0A348FZK6|A0A348FZK6_9RHIZ	0.69	16	5	5	2510000	154000000	9240000	10000000	5180000	9130000	166000000	4600000	21400000	18500000	17400000	23700000	0.48:29.73:1.79:1.94:1.00:1.76:32.05:0.89:4.13:3.58:3.36:4.58	58400000	48500000	24000000	1.20:1.00:0.50	36639	Blastochloridaceae	Blastochloris	DUF4424 domain-containing protein OS=Blastochloris tepida OX=2233851 GN=BLTE_14240 PE=4 SV=1
5603	64003	tr|Q131Y6|Q131Y6_RHOPS	43.09	8	2	2	1250000	1280000	400000	508000	1350000	1550000	2250000	2330000	21400000	16700000	19100000	21600000	0.92:0.95:0.30:0.38:1.00:1.14:1.66:1.72:15.80:12.37:14.14:15.97	858000	1940000	19700000	0.44:1.00:10.18	28168	Bradyrhizobiaceae	Rhodopseudomonas	Pyrroline-5-carboxylate reductase OS=Rhodopseudomonas palustris (strain BisB5) OX=316057 GN=proC PE=3 SV=1
1991	4279	tr|A0A4R3N418|A0A4R3N418_9GAMM	7.87	31	7	7	17100000	13400000	11300000	10900000	6130000	4560000	13200000	12600000	21200000	18700000	15300000	11700000	2.80:2.19:1.84:1.77:1.00:0.74:2.15:2.05:3.46:3.05:2.50:1.90	13200000	9110000	16700000	1.45:1.00:1.84	20524	Chromatiaceae	Thiobaca	Zinc ribbon family protein OS=Thiobaca trueperi OX=127458 GN=EDC35_104307 PE=4 SV=1
2749	26274	tr|A0A0H5BCU6|A0A0H5BCU6_BLAVI	51.2	17	5	2	3730000	2280000	2310000	1810000	8570000	7400000	8680000	7830000	21200000	20400000	22500000	20900000	0.44:0.27:0.27:0.21:1.00:0.86:1.01:0.91:2.47:2.37:2.63:2.43	2530000	8220000	21200000	0.31:1.00:2.58	31705	Blastochloridaceae	Blastochloris	4-hydroxy-tetrahydrodipicolinate synthase OS=Blastochloris viridis OX=1079 GN=mosA PE=3 SV=1
2898	22874	tr|A0A348FY81|A0A348FY81_9RHIZ	30.97	14	6	2	336000	405000	3320000	277000	5340000	5800000	7860000	7960000	21200000	20000000	33600000	19500000	0.06:0.08:0.62:0.05:1.00:1.09:1.47:1.49:3.96:3.74:6.29:3.65	1130000	6820000	24800000	0.17:1.00:3.64	69785	Blastochloridaceae	Blastochloris	Methyl-accepting chemotaxis protein OS=Blastochloris tepida OX=2233851 GN=BLTE_09490 PE=4 SV=1
1115	21356	tr|A0A0H5BNL0|A0A0H5BNL0_BLAVI	58.53	20	8	2	944000	1010000	1390000	890000	13800000	13900000	12600000	13200000	21100000	19600000	19500000	18700000	0.07:0.07:0.10:0.06:1.00:1.00:0.91:0.96:1.52:1.42:1.41:1.35	1060000	13400000	19700000	0.08:1.00:1.47	45198	Blastochloridaceae	Blastochloris	Isocitrate dehydrogenase [NADP] OS=Blastochloris viridis OX=1079 GN=BV133_300 PE=3 SV=1
2306	23961	tr|Q6NBE1|Q6NBE1_RHOPA	34.01	31	7	3	1600000	1750000	2570000	2540000	1290000	1190000	1260000	2470000	21100000	21100000	8850000	16700000	1.24:1.35:1.99:1.96:1.00:0.92:0.98:1.91:16.31:16.33:6.84:12.91	2110000	1550000	18700000	1.36:1.00:12.03	32230	Bradyrhizobiaceae	Rhodopseudomonas	UTP--glucose-1-phosphate uridylyltransferase OS=Rhodopseudomonas palustris (strain ATCC BAA-98 / CGA009) OX=258594 GN=exoN PE=3 SV=1
2960	24668	tr|A0A5M6I1X6|A0A5M6I1X6_9RHIZ	25.33	20	5	5	3470000	3580000	0	1700000	14800000	12800000	15300000	13400000	21000000	20400000	25500000	19200000	0.23:0.24:0:0.12:1.00:0.87:1.03:0.91:1.42:1.38:1.72:1.30	3320000	14600000	21500000	0.23:1.00:1.48	31246	Blastochloridaceae	Blastochloris	S-methyl-5'-thioadenosine phosphorylase OS=Blastochloris sulfoviridis OX=50712 GN=mtnP PE=3 SV=1
385	286	tr|A0A4R3NAV7|A0A4R3NAV7_9GAMM	44.37	24	14	9	13200000	16200000	16000000	14400000	11500000	10300000	11400000	10800000	20900000	22500000	25100000	24400000	1.14:1.41:1.39:1.24:1.00:0.89:0.99:0.94:1.81:1.95:2.17:2.12	16800000	11000000	23300000	1.53:1.00:2.12	86089	Chromatiaceae	Thiobaca	NADH-quinone oxidoreductase OS=Thiobaca trueperi OX=127458 GN=EDC35_101479 PE=3 SV=1
2933	51880	tr|A0A2T4J7L8|A0A2T4J7L8_RHOBL	32.24	24	5	5	44500	0	9090000	10300000	119000	0	216000	214000	20800000	26300000	21200000	26000000	0.37:0:64.00:64.00:1.00:0:1.80:1.79:64.00:64.00:64.00:64.00	6490000	391000	24500000	16.59:1.00:62.70	43276	Rhodobacteraceae	Rhodobacter	Spermidine/putrescine ABC transporter substrate-binding protein OS=Rhodobacter blasticus DSM 2131 OX=1188250 GN=C5F44_12265 PE=3 SV=1
300	917	tr|A0A182CYY4|A0A182CYY4_BLAVI	35.09	33	17	5	8340000	10100000	7480000	7510000	12400000	14000000	13700000	13900000	20700000	22500000	20200000	17900000	0.67:0.82:0.60:0.61:1.00:1.13:1.11:1.12:1.68:1.82:1.63:1.44	8360000	13500000	20300000	0.62:1.00:1.50	54999	Blastochloridaceae	Blastochloris	Ribulose bisphosphate carboxylase large chain OS=Blastochloris viridis OX=1079 GN=cbbL PE=3 SV=1
1920	3146	tr|D3RPE4|D3RPE4_ALLVD	18.75	22	7	3	32600000	30800000	29400000	24800000	40500000	42400000	34100000	33500000	20700000	8990000	19200000	16600000	0.81:0.76:0.73:0.61:1.00:1.05:0.84:0.83:0.51:0.22:0.47:0.41	29400000	37600000	16400000	0.78:1.00:0.44	49578	Chromatiaceae	Allochromatium	Phenylacetate-coenzyme A ligase OS=Allochromatium vinosum (strain ATCC 17899 / DSM 180 / NBRC 103801 / NCIMB 10441 / D) OX=572477 GN=Alvin_2625 PE=3 SV=1
2156	22774	tr|A0A318TIW3|A0A318TIW3_9BRAD	63.69	27	6	4	1870000	2010000	1940000	2270000	5020000	4810000	1910000	1950000	20700000	18500000	17300000	17500000	0.37:0.40:0.39:0.45:1.00:0.96:0.38:0.39:4.13:3.67:3.45:3.48	2020000	3510000	20000000	0.58:1.00:5.68	34652	Bradyrhizobiaceae	Rhodopseudomonas	3-oxoacyl-[acyl-carrier-protein] synthase 3 OS=Rhodopseudomonas faecalis OX=99655 GN=fabH PE=3 SV=1
2409	51446	tr|A0A2T4JEJ2|A0A2T4JEJ2_RHOBL	20.34	26	7	7	76300	622000	3160000	2940000	2310000	1820000	336000	146000	20700000	28300000	23000000	23100000	0.03:0.27:1.37:1.27:1.00:0.79:0.15:0.06:8.99:12.29:9.97:10.03	1760000	1910000	25100000	0.92:1.00:13.14	37019	Rhodobacteraceae	Rhodobacter	Phosphonate ABC transporter substrate-binding protein OS=Rhodobacter blasticus DSM 2131 OX=1188250 GN=C5F44_00095 PE=4 SV=1
6	50301	tr|A0A2T0PIC8|A0A2T0PIC8_RHITR	40.65	34	39	2	3160000	2220000	1280000	1380000	1410000	1500000	1770000	2930000	20600000	24300000	21500000	18500000	2.24:1.58:0.91:0.98:1.00:1.06:1.25:2.07:14.58:17.25:15.22:13.13	2010000	2050000	21400000	0.98:1.00:10.43	153491	Rhizobiaceae	Rhizobium	DNA-directed RNA polymerase subunit beta OS=Rhizobium tropici OX=398 GN=rpoB PE=3 SV=1
4798	56429	tr|S9QTJ6|S9QTJ6_9RHOB	44.43	23	3	2	2110000	39500	354000	2780000	418000	220000	253000	412000	20600000	21600000	22100000	24200000	5.04:0.09:0.85:6.65:1.00:0.53:0.61:0.99:49.39:51.63:52.95:57.89	2550000	349000	41600000	7.30:1.00:64.00	18760	Roseobacteraceae	Rubellimicrobium	Bacterioferritin OS=Rubellimicrobium thermophilum DSM 16684 OX=1123069 GN=ruthe_02026 PE=3 SV=1 Bacterioferritin OS=Rubellimicrobium mesophilum DSM 19309 OX=442562 GN=Rumeso_01067 PE=3 SV=1
5229	8499	tr|A0A318TFN4|A0A318TFN4_9BRAD	4.73	35	2	2	14500000	16200000	24000000	25400000	16700000	19200000	9130000	10600000	20500000	22900000	14300000	14700000	0.87:0.97:1.44:1.52:1.00:1.15:0.55:0.63:1.23:1.37:0.86:0.88	20000000	13900000	18100000	1.44:1.00:1.30	14330	Bradyrhizobiaceae	Rhodopseudomonas	Uncharacterized protein (DUF2147 family) OS=Rhodopseudomonas faecalis OX=99655 GN=BJ122_10797 PE=4 SV=1
5560	38967	tr|A0A5M6I6Y0|A0A5M6I6Y0_9RHIZ	24.84	17	2	2	5420000	5970000	2640000	2550000	14400000	20100000	22800000	17100000	20500000	22500000	14000000	15100000	0.38:0.41:0.18:0.18:1.00:1.39:1.58:1.19:1.42:1.56:0.97:1.05	4140000	18600000	18000000	0.22:1.00:0.97	12655	Blastochloridaceae	Blastochloris	Uncharacterized protein OS=Blastochloris sulfoviridis OX=50712 GN=F1193_00295 PE=4 SV=1
1380	21579	tr|A0A318TKW4|A0A318TKW4_9BRAD	54.49	34	9	7	5140000	4000000	5470000	3980000	3610000	2940000	3890000	2990000	20400000	22400000	19600000	17200000	1.42:1.11:1.52:1.10:1.00:0.81:1.08:0.83:5.66:6.21:5.42:4.78	4650000	3360000	19900000	1.39:1.00:5.93	42480	Bradyrhizobiaceae	Rhodopseudomonas	Uncharacterized protein OS=Rhodopseudomonas faecalis OX=99655 GN=BJ122_103120 PE=4 SV=1
1713	24270	tr|A0A5M6HTE9|A0A5M6HTE9_9RHIZ	32.61	36	6	5	5390000	5360000	3660000	3400000	7170000	5410000	11900000	12900000	20400000	18200000	21200000	19500000	0.75:0.75:0.51:0.47:1.00:0.75:1.66:1.80:2.85:2.54:2.95:2.72	4510000	9330000	19800000	0.48:1.00:2.12	22591	Blastochloridaceae	Blastochloris	Response regulator transcription factor OS=Blastochloris sulfoviridis OX=50712 GN=F1193_12500 PE=4 SV=1
3610	24833	tr|G2E2E2|G2E2E2_9GAMM	16.1	5	3	3	13300000	10900000	8800000	6290000	7770000	6570000	9420000	7240000	20400000	18300000	11300000	12700000	1.71:1.40:1.13:0.81:1.00:0.85:1.21:0.93:2.63:2.35:1.45:1.63	10200000	9020000	15700000	1.13:1.00:1.74	70259	Chromatiaceae	0	RNA polymerase sigma factor RpoD OS=Thiorhodococcus drewsii AZ1 OX=765913 GN=rpoD PE=3 SV=1 RNA polymerase sigma factor RpoD OS=Chromatium okenii OX=61644 GN=rpoD PE=3 SV=1
4089	26053	tr|A0A5M6I3V9|A0A5M6I3V9_9RHIZ	26.01	20	4	4	352000	123000	49100	0	72400	1020000	334000	313000	20400000	13500000	23400000	21300000	4.87:1.70:0.68:0:1.00:14.03:4.61:4.32:64.00:64.00:64.00:64.00	262000	451000	20300000	0.58:1.00:45.06	28125	Blastochloridaceae	Blastochloris	Enoyl-[acyl-carrier-protein] reductase [NADH] OS=Blastochloris sulfoviridis OX=50712 GN=fabI PE=3 SV=1
185	20622	tr|A0A348G0F1|A0A348G0F1_9RHIZ	47.8	44	19	11	82200000	85700000	70400000	70700000	51600000	49100000	91600000	91900000	20300000	19400000	18600000	19400000	1.59:1.66:1.36:1.37:1.00:0.95:1.78:1.78:0.39:0.38:0.36:0.38	77300000	71100000	19400000	1.09:1.00:0.27	56236	Blastochloridaceae	Blastochloris	Propionyl-CoA carboxylase OS=Blastochloris tepida OX=2233851 GN=BLTE_17190 PE=4 SV=1
3191	51839	tr|A0A2T4JA34|A0A2T4JA34_RHOBL	66.57	8	3	3	3450000	3360000	4060000	3960000	5190000	5090000	4440000	4590000	20300000	22600000	24100000	23800000	0.67:0.65:0.78:0.76:1.00:0.98:0.86:0.89:3.91:4.36:4.64:4.60	3790000	5000000	22700000	0.76:1.00:4.54	55075	Rhodobacteraceae	Rhodobacter	Methoxyneurosporene dehydrogenase OS=Rhodobacter blasticus DSM 2131 OX=1188250 GN=C5F44_07695 PE=3 SV=1
1597	22020	tr|A0A5M6HN17|A0A5M6HN17_9RHIZ	27.5	16	8	8	2950000	2340000	1090000	702000	3750000	11700000	3910000	3590000	20200000	14500000	24800000	23500000	0.79:0.62:0.29:0.19:1.00:3.12:1.04:0.96:5.39:3.86:6.61:6.25	1770000	5740000	20700000	0.31:1.00:3.61	71723	Blastochloridaceae	Blastochloris	Acetoacetate--CoA ligase OS=Blastochloris sulfoviridis OX=50712 GN=F1193_14610 PE=3 SV=1
264	20616	tr|A0A318TIJ2|A0A318TIJ2_9BRAD	11.46	25	19	19	28600000	28900000	25600000	22400000	21900000	26800000	20100000	18900000	20000000	20300000	19600000	23800000	1.30:1.32:1.17:1.02:1.00:1.22:0.92:0.86:0.91:0.93:0.90:1.09	26400000	22000000	21700000	1.20:1.00:0.99	116306	Bradyrhizobiaceae	Rhodopseudomonas	Multidrug efflux pump subunit AcrB OS=Rhodopseudomonas faecalis OX=99655 GN=BJ122_10929 PE=4 SV=1
405	938	tr|A0A318TBE8|A0A318TBE8_9BRAD	32.83	24	11	4	6240000	3630000	2160000	5280000	3150000	3190000	1750000	1740000	20000000	17700000	17900000	17700000	1.98:1.15:0.69:1.68:1.00:1.01:0.56:0.55:6.36:5.61:5.67:5.62	5430000	2510000	18300000	2.16:1.00:7.29	74321	Bradyrhizobiaceae	Rhodopseudomonas	Flagellin OS=Rhodopseudomonas faecalis OX=99655 GN=BJ122_1272 PE=3 SV=1
1014	21167	tr|A0A318TDE0|A0A318TDE0_9BRAD	39.93	38	11	8	403000	585000	1550000	122000	828000	1560000	1210000	760000	20000000	15900000	19600000	15800000	0.49:0.71:1.87:0.15:1.00:1.88:1.46:0.92:24.18:19.17:23.68:19.03	664000	1230000	17800000	0.54:1.00:14.48	44816	Bradyrhizobiaceae	Rhodopseudomonas	5-aminolevulinate synthase OS=Rhodopseudomonas faecalis OX=99655 GN=BJ122_109114 PE=3 SV=1
2789	23829	tr|A0A5M6I410|A0A5M6I410_9RHIZ	35.57	18	6	6	2130000	2230000	3420000	3380000	6510000	6280000	5860000	6480000	20000000	16100000	16500000	13800000	0.33:0.34:0.52:0.52:1.00:0.97:0.90:1.00:3.07:2.47:2.53:2.12	2790000	6290000	16600000	0.44:1.00:2.64	41806	Blastochloridaceae	Blastochloris	Polysaccharide export protein OS=Blastochloris sulfoviridis OX=50712 GN=F1193_03510 PE=4 SV=1
1156	22179	tr|A0A318TFY9|A0A318TFY9_9BRAD	52.26	16	8	8	4610000	4270000	4470000	4680000	3140000	3980000	2820000	3470000	19900000	24100000	20900000	19100000	1.47:1.36:1.42:1.49:1.00:1.27:0.90:1.10:6.32:7.67:6.65:6.09	5000000	3640000	21000000	1.37:1.00:5.76	56996	Bradyrhizobiaceae	Rhodopseudomonas	Phytoene desaturase OS=Rhodopseudomonas faecalis OX=99655 GN=BJ122_110104 PE=3 SV=1
2407	28940	tr|A0A318T7Z9|A0A318T7Z9_9BRAD	32.26	55	6	6	1290000	1320000	3270000	1850000	862000	2410000	307000	910000	19900000	21100000	17800000	18400000	1.50:1.53:3.80:2.14:1.00:2.79:0.36:1.06:23.08:24.44:20.63:21.37	2150000	1420000	19400000	1.52:1.00:13.68	11891	Bradyrhizobiaceae	Rhodopseudomonas	Uncharacterized protein OS=Rhodopseudomonas faecalis OX=99655 GN=BJ122_13915 PE=4 SV=1
2663	6304	tr|A0A318TEM1|A0A318TEM1_9BRAD	44.34	19	4	4	1690000	2190000	1360000	1350000	671000	1400000	3530000	2690000	19900000	18500000	15300000	17300000	2.53:3.27:2.02:2.02:1.00:2.08:5.27:4.01:29.71:27.63:22.83:25.84	1650000	2480000	17800000	0.66:1.00:7.16	36305	Bradyrhizobiaceae	Rhodopseudomonas	SPFH domain-containing protein OS=Rhodopseudomonas faecalis OX=99655 GN=BJ122_109136 PE=3 SV=1
1163	2152	tr|A0A4R3N7E3|A0A4R3N7E3_9GAMM	17	10	7	7	19400000	20400000	26100000	21100000	14800000	14900000	16000000	16000000	19600000	15600000	10700000	11500000	1.31:1.37:1.76:1.42:1.00:1.01:1.08:1.08:1.32:1.05:0.72:0.77	21700000	15500000	15600000	1.41:1.00:1.01	70534	Chromatiaceae	Thiobaca	Peptidyl-prolyl cis-trans isomerase D OS=Thiobaca trueperi OX=127458 GN=EDC35_101374 PE=4 SV=1
1204	21785	tr|A0A318TG74|A0A318TG74_9BRAD	15.03	26	8	7	25900000	23900000	19100000	17900000	12900000	11700000	15900000	15700000	19600000	20200000	16800000	16100000	2.01:1.86:1.48:1.39:1.00:0.91:1.23:1.22:1.52:1.57:1.30:1.25	21700000	14200000	19900000	1.54:1.00:1.40	59138	Bradyrhizobiaceae	Rhodopseudomonas	Fatty-acyl-CoA synthase OS=Rhodopseudomonas faecalis OX=99655 GN=BJ122_105150 PE=4 SV=1
3460	26235	tr|A0A318TDH4|A0A318TDH4_9BRAD	33.47	16	5	5	870000	2660000	2230000	623000	1040000	2130000	1010000	689000	19500000	18800000	15500000	16800000	0.83:2.55:2.14:0.60:1.00:2.05:0.97:0.66:18.75:18.00:14.89:16.14	1590000	1220000	17700000	1.31:1.00:14.50	33442	Bradyrhizobiaceae	Rhodopseudomonas	Acetoin utilization deacetylase AcuC-like enzyme OS=Rhodopseudomonas faecalis OX=99655 GN=BJ122_11012 PE=3 SV=1
5524	33452	tr|A0A318T7S1|A0A318T7S1_9BRAD	24.73	11	2	2	7180000	6660000	9580000	1130000	4750000	4400000	2790000	2700000	19500000	16300000	10200000	11500000	1.51:1.40:2.02:0.24:1.00:0.93:0.59:0.57:4.10:3.42:2.15:2.43	7780000	3660000	14700000	2.13:1.00:4.01	22803	Bradyrhizobiaceae	Rhodopseudomonas	Outer membrane immunogenic protein OS=Rhodopseudomonas faecalis OX=99655 GN=BJ122_12620 PE=4 SV=1
1462	1057	tr|A0A5M6HUJ3|A0A5M6HUJ3_9RHIZ	23.78	23	8	8	50300000	48000000	33600000	30200000	21600000	21700000	25400000	26700000	19200000	17200000	19000000	18700000	2.33:2.22:1.55:1.40:1.00:1.00:1.18:1.24:0.89:0.79:0.88:0.87	40600000	23900000	18500000	1.70:1.00:0.77	43001	Blastochloridaceae	Blastochloris	ABC transporter substrate-binding protein OS=Blastochloris sulfoviridis OX=50712 GN=F1193_12010 PE=4 SV=1
2021	22704	tr|A0A318T7H8|A0A318T7H8_9BRAD	27.31	22	8	5	1620000	1670000	2180000	573000	1160000	1110000	59200	655000	19200000	17400000	15000000	14700000	1.40:1.44:1.88:0.49:1.00:0.96:0.05:0.56:16.50:14.93:12.92:12.64	1630000	996000	16600000	1.64:1.00:16.63	40147	Bradyrhizobiaceae	Rhodopseudomonas	Beta sliding clamp OS=Rhodopseudomonas faecalis OX=99655 GN=BJ122_1298 PE=3 SV=1
2439	24868	tr|A0A318T7W7|A0A318T7W7_9BRAD	47.38	38	5	5	2110000	1690000	1350000	1290000	317000	793000	645000	565000	19200000	20700000	19400000	17800000	6.66:5.34:4.25:4.07:1.00:2.50:2.03:1.78:60.59:64.00:61.13:56.23	1830000	1210000	20000000	1.51:1.00:16.47	20276	Bradyrhizobiaceae	Rhodopseudomonas	Uncharacterized protein YidB (DUF937 family) OS=Rhodopseudomonas faecalis OX=99655 GN=BJ122_12525 PE=4 SV=1
1324	2933	tr|A0A5M6I5X7|A0A5M6I5X7_9RHIZ	42.25	38	8	5	1420000	1850000	2110000	1340000	19000000	19000000	28900000	30600000	19100000	17900000	19000000	17600000	0.07:0.10:0.11:0.07:1.00:1.00:1.52:1.61:1.01:0.94:1.00:0.93	1840000	24400000	18400000	0.08:1.00:0.75	24601	Blastochloridaceae	Blastochloris	50S ribosomal protein L1 OS=Blastochloris sulfoviridis OX=50712 GN=rplA PE=3 SV=1
3164	56691	tr|A0A6M5J9H6|A0A6M5J9H6_9SPHN	23.93	8	3	2	155000	99100	0	0	0	0	0	0	19100000	11600000	19600000	21400000	64.00:64.00:-:-:-:-:-:-:64.00:64.00:64.00:64.00	127000	0	17900000	64.00:-:64.00	42965	Sphingomonadaceae	Sphingomonas	Aminotransferase OS=Sphingomonas sp. AP4-R1 OX=2735134 GN=HL653_05440 PE=3 SV=1
4906	55104	tr|A0A2T4JDH0|A0A2T4JDH0_RHOBL	24.87	7	2	2	4590000	782000	3920000	757000	3240000	4960000	6090000	7230000	19000000	19200000	14900000	15500000	1.42:0.24:1.21:0.23:1.00:1.53:1.88:2.23:5.85:5.92:4.60:4.79	2760000	5450000	20600000	0.51:1.00:3.79	43733	Rhodobacteraceae	Rhodobacter	Peptidase OS=Rhodobacter blasticus DSM 2131 OX=1188250 GN=C5F44_02160 PE=4 SV=1
2464	24198	tr|A0A5M6I2Z6|A0A5M6I2Z6_9RHIZ	25.27	23	6	6	2210000	2000000	1400000	5180000	8810000	8370000	5170000	6070000	18900000	18500000	13000000	11400000	0.25:0.23:0.16:0.59:1.00:0.95:0.59:0.69:2.14:2.10:1.47:1.29	3010000	8160000	15400000	0.37:1.00:1.89	32854	Blastochloridaceae	Blastochloris	Branched-chain-amino-acid aminotransferase OS=Blastochloris sulfoviridis OX=50712 GN=ilvE PE=3 SV=1
245	875	tr|A0A0S2T9M3|A0A0S2T9M3_9GAMM	2.07	29	14	4	28700000	27600000	9620000	10700000	5430000	5280000	22200000	24000000	18800000	17200000	17300000	17800000	5.28:5.08:1.77:1.97:1.00:0.97:4.09:4.42:3.46:3.16:3.18:3.27	19300000	14200000	17800000	1.35:1.00:1.25	52345	Chromatiaceae	Candidatus Tenderia	Ribulose bisphosphate carboxylase large chain OS=Candidatus Tenderia electrophaga OX=1748243 GN=rbcL PE=3 SV=1
3141	23558	tr|A0A7W3UBV3|A0A7W3UBV3_RHOPL	32.44	11	5	5	3970000	4360000	5570000	6220000	5780000	5440000	6050000	7060000	18800000	18300000	17900000	12200000	0.69:0.75:0.96:1.08:1.00:0.94:1.05:1.22:3.25:3.17:3.10:2.11	5340000	6220000	16900000	0.86:1.00:2.72	64602	Bradyrhizobiaceae	Rhodopseudomonas	Type I-C CRISPR-associated protein Cas8c/Csd1 OS=Rhodopseudomonas palustris OX=1076 GN=cas8c PE=4 SV=1 CRISPR-associated protein Csd1 family OS=Rhodopseudomonas pseudopalustris OX=1513892 GN=SAMN05444123_10752 PE=4 SV=1
3235	23766	tr|I3Y9N8|I3Y9N8_THIV6	6.55	19	4	3	16500000	13300000	12900000	13500000	14500000	11200000	11100000	16800000	18800000	2660000	4410000	4420000	1.13:0.92:0.89:0.93:1.00:0.77:0.77:1.16:1.30:0.18:0.30:0.30	14000000	13400000	7640000	1.04:1.00:0.57	27861	Chromatiaceae	Thiocystis	Ubiquinone/menaquinone biosynthesis C-methyltransferase UbiE OS=Thiocystis violascens (strain ATCC 17096 / DSM 198 / 6111) OX=765911 GN=ubiE PE=3 SV=1
1363	6732	tr|A0A348G5F9|A0A348G5F9_9RHIZ	33.99	23	9	2	2530000	2300000	6960000	7040000	8430000	8710000	7750000	6570000	18700000	20500000	19100000	15300000	0.30:0.27:0.83:0.83:1.00:1.03:0.92:0.78:2.21:2.44:2.27:1.82	4700000	8300000	18500000	0.57:1.00:2.22	50327	Blastochloridaceae	Blastochloris	3-isopropylmalate dehydratase large subunit OS=Blastochloris tepida OX=2233851 GN=leuC2 PE=3 SV=1
1414	21231	tr|A0A318TU72|A0A318TU72_9BRAD	31.02	16	9	5	329000	377000	1050000	375000	251000	2800000	287000	0	18700000	23700000	29000000	35500000	1.31:1.50:4.17:1.49:1.00:11.15:1.14:0:64.00:64.00:64.00:64.00	554000	1230000	27300000	0.45:1.00:22.28	84348	Bradyrhizobiaceae	Rhodopseudomonas	5-methyltetrahydropteroyltriglutamate--homocysteine methyltransferase OS=Rhodopseudomonas faecalis OX=99655 GN=metE PE=3 SV=1
1555	21835	tr|A0A318TB93|A0A318TB93_9BRAD	40.25	35	8	7	3430000	2030000	4170000	3620000	6950000	6900000	5300000	5960000	18700000	19200000	14500000	16000000	0.49:0.29:0.60:0.52:1.00:0.99:0.76:0.86:2.69:2.77:2.09:2.30	3350000	6320000	18800000	0.53:1.00:2.98	40257	Bradyrhizobiaceae	Rhodopseudomonas	dCTP deaminase OS=Rhodopseudomonas faecalis OX=99655 GN=BJ122_12812 PE=4 SV=1
1150	508	tr|A0A4R3MTX0|A0A4R3MTX0_9GAMM	6.58	28	10	10	19800000	24600000	50000000	46600000	32600000	34300000	37700000	36800000	18600000	380000	19700000	338000	0.61:0.76:1.53:1.43:1.00:1.05:1.16:1.13:0.57:0.02:0.60:0.02	35200000	35300000	9740000	1.00:1.00:0.28	49299	Chromatiaceae	Thiobaca	Outer membrane protein OS=Thiobaca trueperi OX=127458 GN=EDC35_107102 PE=3 SV=1
1178	21195	tr|A0A318TQC0|A0A318TQC0_9BRAD	33.96	33	11	7	1010000	2580000	2590000	1120000	4010000	1980000	2370000	1730000	18600000	16700000	14800000	17100000	0.25:0.64:0.65:0.28:1.00:0.50:0.59:0.43:4.63:4.16:3.69:4.27	1820000	2520000	16800000	0.72:1.00:6.65	42055	Bradyrhizobiaceae	Rhodopseudomonas	Bifunctional enzyme IspD/IspF OS=Rhodopseudomonas faecalis OX=99655 GN=ispDF PE=3 SV=1
2212	52591	tr|A0A0C2AJG4|A0A0C2AJG4_9ACTN	0	35	7	2	97200	0	7330	0	0	22500	0	0	18600000	18600000	13900000	21600000	64.00:-:64.00:-:-:64.00:-:-:64.00:64.00:64.00:64.00	52200	22500	18200000	2.32:1.00:64.00	26136	Streptomycetaceae	Streptomyces	30S ribosomal protein S3 OS=Streptomyces sp. AcH 505 OX=352211 GN=rpsC PE=3 SV=1
2470	51598	tr|A0A2T4J7N5|A0A2T4J7N5_RHOBL	27.45	45	6	4	27900000	27700000	25300000	23400000	16300000	15100000	19800000	19100000	18600000	18400000	14800000	16200000	1.71:1.70:1.55:1.44:1.00:0.92:1.21:1.17:1.14:1.13:0.91:0.99	26100000	17700000	17000000	1.48:1.00:0.96	18424	Rhodobacteraceae	Rhodobacter	Peptidoglycan-associated protein OS=Rhodobacter blasticus DSM 2131 OX=1188250 GN=pal PE=3 SV=1
4071	24196	tr|A0A318TA75|A0A318TA75_9BRAD	29.53	16	4	4	699000	222000	462000	177000	0	584000	1090000	237000	18600000	14700000	16600000	22300000	64.00:64.00:64.00:64.00:-:64.00:64.00:64.00:64.00:64.00:64.00:64.00	929000	822000	19700000	1.13:1.00:23.99	34963	Bradyrhizobiaceae	Rhodopseudomonas	Ubiquinone biosynthesis O-methyltransferase OS=Rhodopseudomonas faecalis OX=99655 GN=ubiG PE=3 SV=1
4112	29490	tr|Q2IXW4|Q2IXW4_RHOP2	20.61	7	4	2	792000	1590000	1350000	950000	0	41100	0	614000	18600000	16300000	11800000	14200000	64.00:64.00:64.00:64.00:-:64.00:-:64.00:64.00:64.00:64.00:64.00	1220000	655000	15200000	1.86:1.00:23.27	57092	Bradyrhizobiaceae	Rhodopseudomonas	Type I secretion outer membrane protein TolC OS=Rhodopseudomonas palustris (strain HaA2) OX=316058 GN=RPB_2241 PE=3 SV=1
5246	29174	tr|A0A0H5B7T3|A0A0H5B7T3_BLAVI	26.1	4	2	2	311000	19700	357000	1050000	2360000	2430000	1050000	1300000	18600000	20200000	11600000	6740000	0.13:0.02:0.15:0.45:1.00:1.03:0.45:0.55:7.86:8.56:4.91:2.86	435000	1790000	14300000	0.24:1.00:7.99	52694	Blastochloridaceae	Blastochloris	Probable cytosol aminopeptidase OS=Blastochloris viridis OX=1079 GN=pepA_1 PE=3 SV=1
305	20808	tr|A0A5M6I228|A0A5M6I228_9RHIZ	34.11	29	14	7	1970000	3110000	2720000	2640000	23500000	21800000	27800000	61500000	18500000	47300000	13300000	34600000	0.08:0.13:0.12:0.11:1.00:0.93:1.18:2.62:0.79:2.02:0.56:1.47	2620000	37000000	29800000	0.07:1.00:0.81	62588	Blastochloridaceae	Blastochloris	30S ribosomal protein S1 OS=Blastochloris sulfoviridis OX=50712 GN=F1193_08265 PE=3 SV=1
3249	25585	tr|A0A533J2P9|A0A533J2P9_9BRAD	30.71	5	3	2	1420000	1600000	1060000	423000	1240000	407000	265000	1880000	18500000	20900000	10300000	10400000	1.15:1.30:0.85:0.34:1.00:0.33:0.21:1.52:14.95:16.92:8.34:8.45	1350000	947000	15300000	1.43:1.00:16.15	74654	Bradyrhizobiaceae	Bradyrhizobium	TonB-dependent hemoglobin/transferrin/lactoferrin family receptor (Fragment) OS=Bradyrhizobium icense OX=1274631 GN=DI543_15950 PE=3 SV=1
3521	52060	tr|A0A5C8EB79|A0A5C8EB79_9BRAD	33.01	15	4	4	3180000	2430000	842000	1710000	6180000	3570000	4070000	4850000	18300000	13700000	13200000	13800000	0.51:0.39:0.14:0.28:1.00:0.58:0.66:0.78:2.95:2.21:2.14:2.23	2660000	5030000	15300000	0.53:1.00:3.05	41663	Bradyrhizobiaceae	Afipia	Peptide chain release factor 2 OS=Afipia sp. OX=1871052 GN=prfB PE=3 SV=1
310	20894	tr|A0A318TC38|A0A318TC38_9BRAD	16.66	28	12	3	28200000	29800000	25900000	23600000	13400000	12800000	20100000	24500000	18200000	18000000	11300000	10200000	2.11:2.23:1.94:1.77:1.00:0.96:1.51:1.84:1.36:1.35:0.85:0.76	27400000	18000000	14400000	1.52:1.00:0.80	63126	Bradyrhizobiaceae	Rhodopseudomonas	Anaerobic Mg-protoporphyrin IX monomethyl ester oxidative cyclase OS=Rhodopseudomonas faecalis OX=99655 GN=BJ122_1119 PE=4 SV=1
1493	21940	tr|A0A5M6I3Y7|A0A5M6I3Y7_9RHIZ	40.17	6	5	4	2500000	3050000	2320000	1470000	5840000	4150000	3010000	3760000	18200000	21700000	17300000	17900000	0.43:0.52:0.40:0.25:1.00:0.71:0.52:0.64:3.12:3.72:2.96:3.06	2560000	5330000	19700000	0.48:1.00:3.69	125395	Blastochloridaceae	Blastochloris	Carbamoyl-phosphate synthase large chain OS=Blastochloris sulfoviridis OX=50712 GN=carB PE=3 SV=1
2553	3760	tr|U3GJZ3|U3GJZ3_THIV6	23.56	11	5	3	77900000	78900000	57600000	57000000	31600000	36000000	40200000	33400000	18200000	1270000	19700000	8940000	2.46:2.49:1.82:1.80:1.00:1.14:1.27:1.06:0.58:0.04:0.62:0.28	67800000	35300000	12300000	1.92:1.00:0.35	39647	Chromatiaceae	Thiocystis	Photosynthetic reaction center cytochrome c subunit OS=Thiocystis violascens (strain ATCC 17096 / DSM 198 / 6111) OX=765911 GN=Thivi_1998 PE=4 SV=1
1177	21138	tr|A0A318TJA4|A0A318TJA4_9BRAD	16.8	14	9	9	18000000	9110000	13500000	11500000	5980000	6290000	4070000	7540000	18100000	18100000	15600000	5740000	3.01:1.52:2.25:1.92:1.00:1.05:0.68:1.26:3.02:3.03:2.61:0.96	13000000	5970000	14700000	2.18:1.00:2.46	81728	Bradyrhizobiaceae	Rhodopseudomonas	Beta-glucosidase OS=Rhodopseudomonas faecalis OX=99655 GN=BJ122_103167 PE=3 SV=1
3431	58018	tr|A0A7Z0Y1A5|A0A7Z0Y1A5_9RHOB	24.04	8	3	3	1770000	2540000	4870000	4370000	7600000	8230000	6220000	5180000	18100000	18500000	13700000	10400000	0.23:0.33:0.64:0.57:1.00:1.08:0.82:0.68:2.39:2.43:1.81:1.37	3390000	6810000	15300000	0.50:1.00:2.25	36957	Stappiaceae	Stappia	Ketol-acid reductoisomerase OS=Stappia sp. 22II-S9-Z10 OX=1317123 GN=ATO13_07160 PE=4 SV=1
588	3085	tr|A0A4R3N7B2|A0A4R3N7B2_9GAMM	22.87	22	14	10	23900000	25700000	24100000	22500000	14600000	24700000	24500000	25600000	18000000	20100000	17000000	17400000	1.64:1.76:1.65:1.54:1.00:1.69:1.68:1.76:1.23:1.38:1.16:1.19	24100000	24500000	18100000	0.98:1.00:0.74	85344	Chromatiaceae	Thiobaca	Phenylalanine--tRNA ligase beta subunit OS=Thiobaca trueperi OX=127458 GN=pheT PE=3 SV=1
1892	21825	tr|A0A318TLQ0|A0A318TLQ0_9BRAD	34.55	24	7	5	1230000	218000	204000	902000	611000	680000	467000	1430000	18000000	15700000	15100000	14500000	2.01:0.36:0.33:1.48:1.00:1.11:0.76:2.33:29.43:25.65:24.76:23.66	786000	988000	17700000	0.80:1.00:17.95	46756	Bradyrhizobiaceae	Rhodopseudomonas	Light-independent protochlorophyllide reductase subunit N OS=Rhodopseudomonas faecalis OX=99655 GN=bchN PE=3 SV=1
1953	22248	tr|A0A318TLT2|A0A318TLT2_9BRAD	23.08	11	7	5	121000	877000	1660000	68000	55900	356000	787000	33000	18000000	13700000	8150000	13100000	2.16:15.69:29.63:1.22:1.00:6.37:14.09:0.59:64.00:64.00:64.00:64.00	804000	476000	13300000	1.69:1.00:27.85	111042	Bradyrhizobiaceae	Rhodopseudomonas	Multidrug efflux pump OS=Rhodopseudomonas faecalis OX=99655 GN=BJ122_10245 PE=4 SV=1
2033	50811	tr|A0A318TPH0|A0A318TPH0_9BRAD	18.86	15	7	4	7460000	7980000	9940000	9500000	6050000	7930000	11500000	10500000	17700000	20000000	15000000	12100000	1.23:1.32:1.64:1.57:1.00:1.31:1.91:1.74:2.93:3.30:2.48:2.00	8760000	9020000	16200000	0.97:1.00:1.80	66112	Bradyrhizobiaceae	Rhodopseudomonas	Heterodimeric methylmalonyl-CoA mutase small subunit OS=Rhodopseudomonas faecalis OX=99655 GN=BJ122_102124 PE=4 SV=1
2425	3952	tr|W9VLC8|W9VLC8_9GAMM	22.51	25	5	5	39200000	25500000	36200000	35500000	22100000	19200000	25300000	19000000	17700000	8310000	9600000	12600000	1.77:1.15:1.64:1.60:1.00:0.87:1.14:0.86:0.80:0.38:0.43:0.57	34100000	21400000	12300000	1.59:1.00:0.57	14416	0	0	Chemotaxis regulator-transmits chemoreceptor signals to flagelllar motor components CheY OS=Imhoffiella purpurea OX=1249627 GN=D779_2498 PE=4 SV=1 Phosphate acceptor regulatory protein OS=Pseudomonas syringae pv. syringae OX=321 GN=cheY PE=4 SV=1 Chemotaxis protein CheY OS=Thalassobium sp. OX=2030825 GN=COB58_04445 PE=4 SV=1
14	77	tr|I3Y6U7|I3Y6U7_THIV6	61.64	54	29	8	293000000	331000000	253000000	268000000	139000000	129000000	190000000	228000000	17500000	19800000	18400000	17800000	2.11:2.38:1.83:1.93:1.00:0.93:1.37:1.64:0.13:0.14:0.13:0.13	286000000	171000000	18500000	1.67:1.00:0.11	57957	Chromatiaceae	Thiocystis	60 kDa chaperonin OS=Thiocystis violascens (strain ATCC 17096 / DSM 198 / 6111) OX=765911 GN=groL PE=3 SV=1
406	20750	tr|A0A318T9V5|A0A318T9V5_9BRAD	27.57	25	11	11	8130000	7660000	6980000	5490000	6170000	6360000	3430000	3120000	17500000	21300000	14100000	13500000	1.32:1.24:1.13:0.89:1.00:1.03:0.56:0.50:2.83:3.45:2.28:2.19	7280000	4950000	21300000	1.47:1.00:4.31	69189	Bradyrhizobiaceae	Rhodopseudomonas	Microcin C transport system substrate-binding protein OS=Rhodopseudomonas faecalis OX=99655 GN=BJ122_11861 PE=3 SV=1
1192	12274	tr|A0A348G4G9|A0A348G4G9_9RHIZ	35.65	26	10	9	1020000	0	596000	943000	7000000	4420000	4950000	2710000	17500000	21500000	17300000	16400000	0.15:0:0.09:0.13:1.00:0.63:0.71:0.39:2.51:3.08:2.46:2.35	884000	6260000	20900000	0.14:1.00:3.35	59536	Blastochloridaceae	Blastochloris	Electron transfer flavoprotein-ubiquinone oxidoreductase OS=Blastochloris tepida OX=2233851 GN=BLTE_31370 PE=4 SV=1
2851	24494	tr|A0A318THZ4|A0A318THZ4_9BRAD	26.82	23	5	5	4440000	1080000	2150000	269000	853000	465000	308000	1670000	17400000	14400000	15900000	18700000	5.20:1.27:2.52:0.32:1.00:0.55:0.36:1.96:20.36:16.93:18.64:21.92	2180000	1160000	16600000	1.87:1.00:14.26	36529	Bradyrhizobiaceae	Rhodopseudomonas	PKS_ER domain-containing protein OS=Rhodopseudomonas faecalis OX=99655 GN=BJ122_107154 PE=4 SV=1
3445	7680	tr|A0A318TA66|A0A318TA66_9BRAD	69.02	23	4	2	8040000	7250000	6190000	6780000	2050000	2440000	2260000	2160000	17400000	18800000	17200000	17200000	3.92:3.53:3.02:3.30:1.00:1.19:1.10:1.05:8.50:9.18:8.40:8.37	7070000	2230000	17700000	3.17:1.00:7.93	25527	Bradyrhizobiaceae	Rhodopseudomonas	3-oxoacyl-[acyl-carrier-protein] reductase /acetoacetyl-CoA reductase OS=Rhodopseudomonas faecalis OX=99655 GN=BJ122_12153 PE=3 SV=1
1021	21872	tr|A0A5M6I121|A0A5M6I121_9RHIZ	35.65	35	8	5	2330000	2790000	2470000	2380000	1760000	2160000	3100000	7570000	17300000	15300000	10900000	11200000	1.33:1.59:1.40:1.35:1.00:1.23:1.76:4.30:9.82:8.71:6.20:6.39	2510000	4960000	13700000	0.51:1.00:2.76	28476	Blastochloridaceae	Blastochloris	Ubiquinone/menaquinone biosynthesis C-methyltransferase UbiE OS=Blastochloris sulfoviridis OX=50712 GN=ubiE PE=3 SV=1
1675	22183	tr|A0A318TNV0|A0A318TNV0_9BRAD	25.35	18	6	5	9510000	11600000	9820000	10500000	7250000	5600000	6200000	6940000	17300000	22100000	9400000	11900000	1.31:1.60:1.35:1.44:1.00:0.77:0.86:0.96:2.39:3.06:1.30:1.64	10400000	7130000	17500000	1.46:1.00:2.46	46380	Bradyrhizobiaceae	Rhodopseudomonas	Tyrosine--tRNA ligase OS=Rhodopseudomonas faecalis OX=99655 GN=tyrS PE=3 SV=1
3316	27972	tr|A0A6N8DZ15|A0A6N8DZ15_9RHIZ	28.18	19	4	4	75900	127000	0	10800	4200000	3310000	2390000	6020000	17300000	22900000	28100000	31500000	0.02:0.03:0:0.02:1.00:0.79:0.57:1.44:4.12:5.45:6.69:7.51	116000	4120000	24900000	0.03:1.00:6.05	23377	Hyphomicrobiaceae	Rhodoplanes	Phasin_2 domain-containing protein OS=Rhodoplanes serenus OX=200615 GN=GJ689_05430 PE=4 SV=1
4155	25048	tr|A0A318TE89|A0A318TE89_9BRAD	30.24	14	4	4	2050000	1860000	477000	522000	3350000	1960000	1230000	1260000	17300000	14200000	11300000	11700000	0.61:0.56:0.14:0.16:1.00:0.58:0.37:0.38:5.17:4.25:3.39:3.50	1950000	2020000	15000000	0.97:1.00:7.42	38607	Bradyrhizobiaceae	Rhodopseudomonas	Penicillin amidase OS=Rhodopseudomonas faecalis OX=99655 GN=BJ122_1074 PE=3 SV=1
1179	21854	tr|A0A5M6HTP4|A0A5M6HTP4_9RHIZ	34.29	28	9	6	1620000	1680000	1020000	666000	3670000	3570000	8750000	6100000	17200000	18100000	21300000	17200000	0.44:0.46:0.28:0.18:1.00:0.97:2.39:1.66:4.68:4.93:5.81:4.70	1240000	5520000	18400000	0.23:1.00:3.34	40334	Blastochloridaceae	Blastochloris	Beta sliding clamp OS=Blastochloris sulfoviridis OX=50712 GN=F1193_12550 PE=3 SV=1
5424	39271	tr|A0A318TBK0|A0A318TBK0_9BRAD	26.42	10	2	2	987000	0	307000	351000	118000	179000	692000	835000	17200000	9100000	6890000	7100000	8.39:0:2.61:2.99:1.00:1.52:5.89:7.10:64.00:64.00:58.56:60.32	549000	456000	10100000	1.20:1.00:22.06	15724	Bradyrhizobiaceae	Rhodopseudomonas	Uncharacterized protein OS=Rhodopseudomonas faecalis OX=99655 GN=BJ122_11564 PE=4 SV=1
1689	4972	B6JET6|RL2_OLICO	25.22	27	7	2	11400000	9720000	9870000	9540000	1540000	3260000	1390000	1040000	17100000	19400000	13900000	10700000	7.40:6.33:6.42:6.21:1.00:2.12:0.91:0.68:11.16:12.61:9.06:6.96	10100000	1810000	15300000	5.60:1.00:8.46	30604	Bradyrhizobiaceae	Afipia	50S ribosomal protein L2 OS=Oligotropha carboxidovorans (strain ATCC 49405 / DSM 1227 / KCTC 32145 / OM5) OX=504832 GN=rplB PE=3 SV=1
3980	25147	tr|A0A318TKE6|A0A318TKE6_9BRAD	38.6	13	3	3	0	1520000	891000	1110000	1080000	719000	1080000	1950000	17100000	15200000	10700000	11600000	0:1.41:0.82:1.02:1.00:0.66:0.99:1.80:15.77:14.08:9.85:10.70	1270000	1290000	13600000	0.99:1.00:10.57	28716	Bradyrhizobiaceae	Rhodopseudomonas	Tryptophan synthase alpha chain OS=Rhodopseudomonas faecalis OX=99655 GN=trpA PE=3 SV=1
3981	25219	tr|A0A318TLP4|A0A318TLP4_9BRAD	8.59	20	4	4	23400000	27900000	9340000	18400000	17600000	18800000	16800000	21200000	17100000	15500000	13500000	11200000	1.33:1.59:0.53:1.05:1.00:1.07:0.95:1.21:0.97:0.88:0.77:0.64	19800000	18700000	16200000	1.06:1.00:0.87	33340	Bradyrhizobiaceae	Rhodopseudomonas	D-aminopeptidase OS=Rhodopseudomonas faecalis OX=99655 GN=BJ122_10212 PE=3 SV=1
74	2763	tr|A0A5M6I4N9|A0A5M6I4N9_9RHIZ	12.53	32	16	3	4190000	3930000	8860000	2570000	7590000	6840000	7980000	6710000	17000000	7760000	19200000	15100000	0.55:0.52:1.17:0.34:1.00:0.90:1.05:0.88:2.25:1.02:2.53:1.99	4970000	7280000	17100000	0.68:1.00:2.35	57240	Blastochloridaceae	Blastochloris	60 kDa chaperonin OS=Blastochloris sulfoviridis OX=50712 GN=groL PE=3 SV=1
3098	24558	tr|Q07LI8|Q07LI8_RHOP5	7.91	9	4	2	1460000	0	273000	0	0	0	404000	23600	17000000	19000000	15800000	16000000	64.00:-:64.00:-:-:-:64.00:64.00:64.00:64.00:64.00:64.00	865000	214000	17000000	4.05:1.00:64.00	60681	Bradyrhizobiaceae	Rhodopseudomonas	GMP synthase [glutamine-hydrolyzing] OS=Rhodopseudomonas palustris (strain BisA53) OX=316055 GN=guaA PE=3 SV=1
4855	28395	tr|A0A318TKU4|A0A318TKU4_9BRAD	12.3	13	3	3	0	286000	19700	0	36300	102000	0	0	16800000	13100000	16200000	16900000	0:7.88:0.54:0:1.00:2.80:0:0:64.00:64.00:64.00:64.00	153000	68900	17700000	2.22:1.00:64.00	32507	Bradyrhizobiaceae	Rhodopseudomonas	Protease HtpX homolog OS=Rhodopseudomonas faecalis OX=99655 GN=htpX PE=3 SV=1
5421	38034	tr|A0A0R3E5U4|A0A0R3E5U4_9BRAD	43.14	23	2	2	7520000	6390000	6690000	1140000	1960000	1970000	1380000	1450000	16800000	15200000	15800000	15800000	3.84:3.26:3.41:0.58:1.00:1.00:0.71:0.74:8.55:7.73:8.07:8.06	6830000	1920000	16800000	3.56:1.00:8.76	11051	Bradyrhizobiaceae	Bradyrhizobium	50S ribosomal protein L23 OS=Bradyrhizobium manausense OX=989370 GN=rplW PE=3 SV=1
2637	27055	tr|A0A0H5B7A5|A0A0H5B7A5_BLAVI	33.1	10	3	3	82800000	98700000	76700000	89900000	66200000	60700000	85000000	93600000	16700000	17900000	11900000	8490000	1.25:1.49:1.16:1.36:1.00:0.92:1.28:1.42:0.25:0.27:0.18:0.13	87100000	76400000	13800000	1.14:1.00:0.18	43833	Blastochloridaceae	Blastochloris	Aminotransferase OS=Blastochloris viridis OX=1079 GN=BV133_459 PE=3 SV=1
4627	33367	tr|A0A348G4S6|A0A348G4S6_9RHIZ	30.25	10	2	2	3370000	3330000	1210000	1180000	8420000	5460000	8270000	6860000	16500000	23100000	29400000	32400000	0.40:0.40:0.14:0.14:1.00:0.65:0.98:0.81:1.96:2.75:3.49:3.85	2880000	7510000	25400000	0.38:1.00:3.38	25344	Blastochloridaceae	Blastochloris	Calcium-binding protein OS=Blastochloris tepida OX=2233851 GN=BLTE_32440 PE=3 SV=1
594	984	tr|A0A4R3N169|A0A4R3N169_9GAMM	46.07	23	9	5	117000000	112000000	121000000	104000000	75900000	68900000	87500000	91100000	16300000	13600000	11300000	9900000	1.54:1.48:1.60:1.37:1.00:0.91:1.15:1.20:0.21:0.18:0.15:0.13	114000000	80800000	13500000	1.41:1.00:0.17	42707	Chromatiaceae	Thiobaca	von Willebrand factor type A domain-containing protein OS=Thiobaca trueperi OX=127458 GN=EDC35_102109 PE=4 SV=1
1360	1954	tr|A0A4R3MZ81|A0A4R3MZ81_9GAMM	11.96	19	7	7	25200000	22000000	30700000	29300000	25100000	32100000	33000000	35000000	16300000	15500000	2740000	3200000	1.01:0.88:1.22:1.17:1.00:1.28:1.31:1.39:0.65:0.62:0.11:0.13	26800000	31300000	12100000	0.86:1.00:0.39	47119	Chromatiaceae	Thiobaca	Small subunit ribosomal protein S1 OS=Thiobaca trueperi OX=127458 GN=EDC35_103106 PE=4 SV=1
2292	4938	tr|A0A318TQ38|A0A318TQ38_9BRAD	39.13	16	6	4	9090000	13800000	11100000	10400000	6320000	6130000	4910000	6060000	16300000	13400000	13200000	14100000	1.44:2.18:1.76:1.64:1.00:0.97:0.78:0.96:2.58:2.12:2.08:2.22	11100000	5860000	14200000	1.90:1.00:2.43	60427	Bradyrhizobiaceae	Rhodopseudomonas	Fatty-acyl-CoA synthase OS=Rhodopseudomonas faecalis OX=99655 GN=BJ122_10422 PE=4 SV=1
499	445	tr|A0A4R3N6F6|A0A4R3N6F6_9GAMM	35.33	52	11	10	257000000	302000000	258000000	259000000	209000000	219000000	207000000	232000000	16200000	11400000	26700000	31100000	1.23:1.44:1.23:1.24:1.00:1.05:0.99:1.11:0.08:0.05:0.13:0.15	270000000	217000000	21400000	1.24:1.00:0.10	23860	Chromatiaceae	Thiobaca	Adenylate kinase OS=Thiobaca trueperi OX=127458 GN=adk PE=3 SV=1
1087	21511	tr|A0A318T7E7|A0A318T7E7_9BRAD	32.13	6	5	5	39800000	38700000	60200000	39300000	31900000	31200000	49700000	48400000	16200000	19000000	15400000	14300000	1.25:1.21:1.89:1.23:1.00:0.98:1.56:1.52:0.51:0.60:0.48:0.45	44600000	40400000	16200000	1.10:1.00:0.40	88116	Bradyrhizobiaceae	Rhodopseudomonas	Uncharacterized protein OS=Rhodopseudomonas faecalis OX=99655 GN=BJ122_1304 PE=4 SV=1
2038	1657	tr|A0A4R3N232|A0A4R3N232_9GAMM	37.2	18	6	6	29900000	27000000	34600000	27600000	45000000	46200000	38100000	36900000	16200000	11800000	10500000	13200000	0.66:0.60:0.77:0.61:1.00:1.03:0.85:0.82:0.36:0.26:0.23:0.29	29800000	41500000	12900000	0.72:1.00:0.31	34082	Chromatiaceae	Thiobaca	Ubiquinone biosynthesis protein UbiV OS=Thiobaca trueperi OX=127458 GN=ubiV PE=3 SV=1
3149	53457	tr|C8S2E0|C8S2E0_9RHOB	25.93	11	4	2	4430000	4960000	2880000	3240000	3850000	3510000	5460000	6520000	16100000	13800000	9570000	9480000	1.15:1.29:0.75:0.84:1.00:0.91:1.42:1.69:4.19:3.60:2.49:2.46	4080000	4830000	12300000	0.84:1.00:2.54	40420	Rhodobacteraceae	Rhodobacter	Acetyl-CoA acetyltransferase OS=Rhodobacter sp. SW2 OX=371731 GN=Rsw2DRAFT_2218 PE=3 SV=1
4621	30423	tr|A0A318T9E1|A0A318T9E1_9BRAD	24.5	25	3	3	856000	592000	532000	65500	125000	270000	1360000	33500	16100000	8780000	14800000	15200000	6.84:4.73:4.25:0.52:1.00:2.16:10.87:0.27:64.00:64.00:64.00:64.00	682000	639000	14600000	1.07:1.00:22.84	20917	Bradyrhizobiaceae	Rhodopseudomonas	Putative membrane protein OS=Rhodopseudomonas faecalis OX=99655 GN=BJ122_11966 PE=4 SV=1
2831	5138	tr|A0A318TCR3|A0A318TCR3_9BRAD	41.26	24	5	2	2440000	2160000	920000	876000	867000	630000	1110000	1320000	16000000	17100000	19300000	19000000	2.82:2.50:1.06:1.01:1.00:0.73:1.28:1.52:18.46:19.69:22.25:21.88	1600000	981000	17800000	1.63:1.00:18.19	19154	Bradyrhizobiaceae	Rhodopseudomonas	50S ribosomal protein L6 OS=Rhodopseudomonas faecalis OX=99655 GN=rplF PE=3 SV=1
2930	51749	tr|A0A2M6UZ91|A0A2M6UZ91_9BURK	43.89	11	4	4	732000	728000	1010000	1270000	1120000	1480000	141000	325000	16000000	19000000	19000000	19700000	0.65:0.65:0.90:1.13:1.00:1.32:0.13:0.29:14.27:16.95:16.96:17.55	1270000	937000	20100000	1.35:1.00:21.45	49572	Comamonadaceae	Limnohabitans	Argininosuccinate synthase OS=Limnohabitans sp. JirII-31 OX=1977908 GN=argG PE=3 SV=1
2954	23124	tr|Q07HC5|Q07HC5_RHOP5	0	22	5	3	66200	0	63100	0	0	0	21600	0	16000000	15300000	15400000	11600000	64.00:-:64.00:-:-:-:64.00:-:64.00:64.00:64.00:64.00	129000	21600	15400000	5.98:1.00:64.00	34981	Bradyrhizobiaceae	Rhodopseudomonas	Ubiquinone biosynthesis protein UbiU OS=Rhodopseudomonas palustris (strain BisA53) OX=316055 GN=ubiU PE=3 SV=1
2839	22756	tr|A0A5M6I1Q9|A0A5M6I1Q9_9RHIZ	24.75	8	3	3	741000	835000	1040000	4420000	4030000	1000000	3140000	3250000	15900000	16900000	18400000	15800000	0.18:0.21:0.26:1.09:1.00:0.25:0.78:0.80:3.93:4.19:4.56:3.93	2710000	3530000	16800000	0.77:1.00:4.75	57437	Blastochloridaceae	Blastochloris	Protein translocase subunit SecD OS=Blastochloris sulfoviridis OX=50712 GN=secD PE=3 SV=1
226	20637	tr|A0A318T7V2|A0A318T7V2_9BRAD	10.63	24	17	5	3520000	2630000	3730000	4940000	5210000	4710000	6570000	5300000	15800000	21100000	3420000	5900000	0.68:0.51:0.72:0.95:1.00:0.90:1.26:1.02:3.04:4.05:0.66:1.13	4440000	6020000	18500000	0.74:1.00:3.08	101232	Bradyrhizobiaceae	Rhodopseudomonas	Histidine kinase OS=Rhodopseudomonas faecalis OX=99655 GN=BJ122_1502 PE=4 SV=1
4502	27950	tr|A0A318TR73|A0A318TR73_9BRAD	19.9	17	3	3	12900000	10400000	5970000	7310000	7580000	6820000	4670000	8650000	15800000	15200000	14100000	12000000	1.70:1.38:0.79:0.96:1.00:0.90:0.62:1.14:2.09:2.01:1.86:1.58	9190000	7030000	14300000	1.31:1.00:2.03	27573	Bradyrhizobiaceae	Rhodopseudomonas	5'-nucleotidase SurE OS=Rhodopseudomonas faecalis OX=99655 GN=surE PE=3 SV=1
4727	27773	tr|A0A5M6I4J1|A0A5M6I4J1_9RHIZ	24.09	12	2	2	1340000	1210000	46200	1020000	1400000	1460000	3530000	3250000	15800000	12500000	10800000	11900000	0.96:0.87:0.03:0.73:1.00:1.04:2.52:2.33:11.29:8.95:7.72:8.51	934000	2800000	12700000	0.33:1.00:4.56	27426	Blastochloridaceae	Blastochloris	3-hydroxybutyrate dehydrogenase OS=Blastochloris sulfoviridis OX=50712 GN=F1193_04230 PE=4 SV=1
708	21094	tr|A0A0S6UHJ6|A0A0S6UHJ6_9BRAD	46.7	27	14	2	1670000	1080000	915000	996000	593000	569000	1380000	1270000	15700000	18800000	13300000	13700000	2.81:1.83:1.54:1.68:1.00:0.96:2.34:2.15:26.42:31.67:22.35:23.11	1170000	955000	15300000	1.22:1.00:16.07	65696	Bradyrhizobiaceae	Bradyrhizobium	30S ribosomal protein S1 OS=Bradyrhizobium sp. DOA9 OX=1126627 GN=BDOA9_0110910 PE=3 SV=1
1646	21946	tr|A0A318U0B4|A0A318U0B4_9BRAD	41.39	12	7	5	2800000	535000	5580000	132000	912000	0	628000	889000	15700000	16400000	12100000	13200000	3.07:0.59:6.12:0.14:1.00:0:0.69:0.97:17.23:17.95:13.26:14.51	3330000	1050000	14400000	3.19:1.00:13.72	76894	Bradyrhizobiaceae	Rhodopseudomonas	Threonine--tRNA ligase OS=Rhodopseudomonas faecalis OX=99655 GN=thrS PE=3 SV=1
1959	23235	tr|A0A348G3M3|A0A348G3M3_9RHIZ	40.82	21	7	7	2540000	2340000	1430000	1480000	10300000	10200000	12000000	9600000	15600000	13800000	14100000	16100000	0.25:0.23:0.14:0.14:1.00:0.99:1.17:0.93:1.51:1.34:1.37:1.57	1950000	10500000	14900000	0.19:1.00:1.41	48605	Blastochloridaceae	Blastochloris	Coproporphyrinogen-III oxidase OS=Blastochloris tepida OX=2233851 GN=BLTE_28410 PE=3 SV=1
2914	24187	tr|A0A348G4Q4|A0A348G4Q4_9RHIZ	6.15	28	5	5	12200000	8880000	7770000	7310000	8130000	8280000	12200000	9690000	15600000	12000000	11000000	9470000	1.50:1.09:0.95:0.90:1.00:1.02:1.50:1.19:1.91:1.47:1.35:1.16	9590000	9720000	12800000	0.99:1.00:1.32	22117	Blastochloridaceae	Blastochloris	Protein GrpE OS=Blastochloris tepida OX=2233851 GN=grpE PE=3 SV=1
2929	51747	tr|A0A318T9R7|A0A318T9R7_9BRAD	2.27	20	5	5	10600000	11300000	6930000	5300000	5210000	6610000	8440000	8170000	15500000	8030000	7290000	6570000	2.03:2.17:1.33:1.02:1.00:1.27:1.62:1.57:2.98:1.54:1.40:1.26	8710000	7480000	9360000	1.16:1.00:1.25	35110	Bradyrhizobiaceae	Rhodopseudomonas	Sugar/nucleoside kinase (Ribokinase family) OS=Rhodopseudomonas faecalis OX=99655 GN=BJ122_12114 PE=4 SV=1
4762	32074	tr|A0A318TG77|A0A318TG77_9BRAD	20.75	20	2	2	6710000	244000	1670000	2310000	8600000	7810000	1720000	5710000	15500000	64300000	70200000	65300000	0.78:0.03:0.19:0.27:1.00:0.91:0.20:0.66:1.80:7.47:8.16:7.59	3500000	5960000	60900000	0.59:1.00:10.21	23736	Bradyrhizobiaceae	Rhodopseudomonas	Uncharacterized protein OS=Rhodopseudomonas faecalis OX=99655 GN=BJ122_11453 PE=4 SV=1
1677	22417	tr|A0A318TH04|A0A318TH04_9BRAD	3.31	15	8	8	13300000	13200000	8920000	9610000	8820000	7380000	13500000	16200000	15400000	14500000	10900000	12000000	1.50:1.50:1.01:1.09:1.00:0.84:1.53:1.83:1.75:1.65:1.23:1.36	11200000	11500000	13300000	0.98:1.00:1.16	73487	Bradyrhizobiaceae	Rhodopseudomonas	Short chain enoyl-CoA hydratase /3-hydroxyacyl-CoA dehydrogenase OS=Rhodopseudomonas faecalis OX=99655 GN=BJ122_1085 PE=3 SV=1
239	904	tr|A0A4R3N1J7|A0A4R3N1J7_9GAMM	63.96	25	9	6	130000000	155000000	125000000	131000000	107000000	109000000	125000000	122000000	15300000	17600000	13900000	13500000	1.21:1.45:1.16:1.23:1.00:1.02:1.17:1.14:0.14:0.16:0.13:0.13	136000000	116000000	15200000	1.18:1.00:0.13	39712	Chromatiaceae	Thiobaca	Photosynthetic reaction center cytochrome c subunit OS=Thiobaca trueperi OX=127458 GN=EDC35_10236 PE=4 SV=1
601	20848	tr|A0A318U0K5|A0A318U0K5_9BRAD	24.43	25	12	10	2950000	710000	1130000	1900000	1160000	353000	1290000	8390000	15200000	17800000	13900000	13400000	2.54:0.61:0.98:1.64:1.00:0.30:1.11:7.23:13.08:15.33:11.99:11.59	1670000	2930000	15100000	0.57:1.00:5.14	73455	Bradyrhizobiaceae	Rhodopseudomonas	NADH-quinone oxidoreductase OS=Rhodopseudomonas faecalis OX=99655 GN=BJ122_101192 PE=3 SV=1
991	3563	tr|A0A4R3MZU5|A0A4R3MZU5_9GAMM	32.79	15	8	8	24100000	32100000	34500000	29700000	38300000	33300000	27800000	37900000	15200000	15100000	15400000	19100000	0.63:0.84:0.90:0.78:1.00:0.87:0.73:0.99:0.40:0.39:0.40:0.50	32100000	39700000	16200000	0.81:1.00:0.41	75738	Chromatiaceae	Thiobaca	Glycine--tRNA ligase beta subunit OS=Thiobaca trueperi OX=127458 GN=glyS PE=3 SV=1
1346	24300	tr|W3RQ15|W3RQ15_9BRAD	18.02	20	5	2	4060000	2960000	1130000	1840000	4410000	4430000	13700000	12800000	15100000	16000000	7370000	7560000	0.92:0.67:0.26:0.42:1.00:1.00:3.11:2.90:3.43:3.63:1.67:1.72	2660000	9150000	14200000	0.29:1.00:1.55	36047	Bradyrhizobiaceae	Afipia	Glyceraldehyde-3-phosphate dehydrogenase OS=Afipia sp. P52-10 OX=1429916 GN=gapA PE=3 SV=1
2612	53477	tr|A0A2T0NH61|A0A2T0NH61_RHITR	41.54	21	6	2	1240000	1230000	1010000	1700000	6330000	7280000	7070000	8360000	15100000	27400000	40100000	39400000	0.20:0.19:0.16:0.27:1.00:1.15:1.12:1.32:2.39:4.33:6.34:6.23	2020000	7720000	35200000	0.26:1.00:4.56	29969	Rhizobiaceae	Rhizobium	Succinate--CoA ligase [ADP-forming] subunit alpha OS=Rhizobium tropici OX=398 GN=sucD PE=3 SV=1
3178	14656	tr|A0A318THW2|A0A318THW2_9BRAD	39.89	12	4	4	2220000	3150000	2780000	2770000	3360000	3860000	6590000	4090000	15100000	26500000	16800000	16600000	0.66:0.94:0.83:0.82:1.00:1.15:1.96:1.22:4.50:7.88:4.98:4.93	2790000	4470000	19600000	0.62:1.00:4.37	48781	Bradyrhizobiaceae	Rhodopseudomonas	Microcin-processing peptidase 1 OS=Rhodopseudomonas faecalis OX=99655 GN=BJ122_103105 PE=3 SV=1
811	1004	tr|A0A318TAI3|A0A318TAI3_9BRAD	20.54	40	11	6	39800000	39800000	17400000	22100000	20900000	19500000	29200000	25900000	14900000	13800000	14600000	12700000	1.90:1.90:0.83:1.05:1.00:0.93:1.39:1.24:0.71:0.66:0.70:0.61	29700000	23900000	14000000	1.25:1.00:0.59	34069	Bradyrhizobiaceae	Rhodopseudomonas	Cysteine synthase OS=Rhodopseudomonas faecalis OX=99655 GN=BJ122_11960 PE=3 SV=1
1997	22834	tr|A0A0H5BE11|A0A0H5BE11_BLAVI	40.97	11	4	4	3410000	3520000	1990000	2700000	8430000	7930000	6520000	6930000	14900000	14200000	18200000	14500000	0.40:0.42:0.24:0.32:1.00:0.94:0.77:0.82:1.77:1.69:2.15:1.72	2990000	7470000	16800000	0.40:1.00:2.24	49428	Blastochloridaceae	Blastochloris	L-Lysine-8-amino-7-oxononanoate aminotransferase OS=Blastochloris viridis OX=1079 GN=bioK PE=3 SV=1
5551	38005	tr|Q07QM6|Q07QM6_RHOP5	41.9	43	2	2	1930000	2010000	1720000	1270000	343000	1670000	885000	975000	14900000	15800000	15100000	14500000	5.64:5.86:5.01:3.72:1.00:4.87:2.58:2.85:43.35:46.11:44.02:42.20	1730000	2410000	15100000	0.72:1.00:6.26	8739	Bradyrhizobiaceae	Rhodopseudomonas	Uncharacterized protein OS=Rhodopseudomonas palustris (strain BisA53) OX=316055 GN=RPE_1810 PE=4 SV=1
4168	27437	tr|A0A318TGY0|A0A318TGY0_9BRAD	37.89	31	4	3	5130000	933000	2210000	2770000	391000	174000	302000	508000	14800000	16100000	16000000	18000000	13.11:2.38:5.65:7.08:1.00:0.45:0.77:1.30:37.83:41.23:40.79:45.99	2800000	376000	16200000	7.43:1.00:43.14	19318	Bradyrhizobiaceae	Rhodopseudomonas	Adenine phosphoribosyltransferase OS=Rhodopseudomonas faecalis OX=99655 GN=apt PE=3 SV=1
5398	32109	tr|A0A0H5B9Y4|A0A0H5B9Y4_BLAVI	38.76	37	2	2	448000	611000	231000	163000	10900000	11400000	5120000	5590000	14800000	15200000	22300000	26300000	0.04:0.06:0.02:0.02:1.00:1.04:0.47:0.51:1.35:1.39:2.04:2.41	413000	8260000	19600000	0.05:1.00:2.38	10306	Blastochloridaceae	Blastochloris	Acyl carrier protein OS=Blastochloris viridis OX=1079 GN=acpXL PE=4 SV=1
2841	23049	tr|A0A318TGF7|A0A318TGF7_9BRAD	39.42	19	6	5	3440000	2930000	2500000	2340000	1620000	1870000	2850000	2820000	14700000	13400000	16800000	9790000	2.12:1.81:1.55:1.45:1.00:1.16:1.76:1.74:9.11:8.30:10.41:6.05	3010000	2300000	13700000	1.31:1.00:5.96	45720	Bradyrhizobiaceae	Rhodopseudomonas	Bifunctional protein GlmU OS=Rhodopseudomonas faecalis OX=99655 GN=glmU PE=3 SV=1
4191	28952	tr|A0A318TJZ3|A0A318TJZ3_9BRAD	19.91	24	4	4	41600000	42600000	49200000	51200000	30200000	29700000	39100000	28700000	14700000	14900000	2820000	17100000	1.38:1.41:1.63:1.70:1.00:0.99:1.30:0.95:0.49:0.49:0.09:0.57	46200000	31900000	12400000	1.45:1.00:0.39	20269	Bradyrhizobiaceae	Rhodopseudomonas	LemA protein OS=Rhodopseudomonas faecalis OX=99655 GN=BJ122_10495 PE=3 SV=1
2041	22411	tr|A0A5M6I467|A0A5M6I467_9RHIZ	35.05	24	7	7	2130000	4060000	1890000	1840000	6660000	7860000	5170000	6000000	14500000	17000000	15000000	11800000	0.32:0.61:0.28:0.28:1.00:1.18:0.78:0.90:2.18:2.56:2.25:1.77	2960000	6530000	14600000	0.45:1.00:2.23	43267	Blastochloridaceae	Blastochloris	D-alanine--D-alanine ligase OS=Blastochloris sulfoviridis OX=50712 GN=ddl PE=3 SV=1
4172	27699	tr|A0A418VLT3|A0A418VLT3_RHOPL	29.97	16	3	3	882000	676000	457000	68800	676000	845000	212000	195000	14500000	17300000	14600000	11400000	1.30:1.00:0.68:0.10:1.00:1.25:0.31:0.29:21.47:25.53:21.56:16.93	666000	678000	14400000	0.98:1.00:21.29	28339	Bradyrhizobiaceae	Rhodopseudomonas	Uncharacterized protein OS=Rhodopseudomonas palustris OX=1076 GN=D4Q52_04735 PE=4 SV=1
1027	50836	tr|A0A318TK86|A0A318TK86_9BRAD	40.63	19	8	5	2460000	1930000	1020000	1070000	431000	550000	1010000	390000	14300000	17400000	12800000	12900000	5.70:4.47:2.37:2.49:1.00:1.27:2.35:0.90:33.08:40.24:29.75:29.82	1700000	613000	15200000	2.78:1.00:24.71	45741	Bradyrhizobiaceae	Rhodopseudomonas	Cysteine desulfurase OS=Rhodopseudomonas faecalis OX=99655 GN=BJ122_10649 PE=3 SV=1
3664	24438	tr|A0A4R3MUH2|A0A4R3MUH2_9GAMM	26.52	7	4	4	759000	1270000	2080000	2310000	5330000	5590000	1230000	2070000	14200000	13100000	9740000	11600000	0.14:0.24:0.39:0.43:1.00:1.05:0.23:0.39:2.66:2.45:1.83:2.18	2010000	4710000	12200000	0.43:1.00:2.59	83617	Chromatiaceae	Thiobaca	GTP pyrophosphokinase OS=Thiobaca trueperi OX=127458 GN=EDC35_10645 PE=3 SV=1
227	309	tr|A0A4R3MWB7|A0A4R3MWB7_9GAMM	67.2	27	16	6	888000000	891000000	971000000	900000000	845000000	841000000	879000000	875000000	14000000	13000000	11400000	9800000	1.05:1.05:1.15:1.07:1.00:1.00:1.04:1.04:0.02:0.02:0.02:0.02	913000000	861000000	12900000	1.06:1.00:0.02	68798	Chromatiaceae	Thiobaca	K(+)-insensitive pyrophosphate-energized proton pump OS=Thiobaca trueperi OX=127458 GN=hppA PE=3 SV=1
3398	28080	tr|A0A5M6I745|A0A5M6I745_9RHIZ	24.05	24	4	4	5360000	4380000	5830000	6100000	6270000	4130000	13000000	12900000	14000000	9110000	12900000	11000000	0.85:0.70:0.93:0.97:1.00:0.66:2.08:2.06:2.23:1.45:2.05:1.75	5600000	10800000	11700000	0.52:1.00:1.08	18051	Blastochloridaceae	Blastochloris	50S ribosomal protein L10 OS=Blastochloris sulfoviridis OX=50712 GN=rplJ PE=3 SV=1
4180	28458	tr|A0A6N8DYP3|A0A6N8DYP3_9RHIZ	52.45	13	2	2	41400000	43700000	47500000	40600000	30700000	28600000	32700000	31700000	13900000	13600000	12100000	11300000	1.35:1.42:1.55:1.32:1.00:0.93:1.07:1.03:0.45:0.44:0.39:0.37	43300000	30900000	12700000	1.40:1.00:0.41	15319	Hyphomicrobiaceae	Rhodoplanes	50S ribosomal protein L17 OS=Rhodoplanes serenus OX=200615 GN=rplQ PE=3 SV=1
1375	1448	tr|A0A4R3N8A2|A0A4R3N8A2_9GAMM	8.81	26	9	9	12400000	10200000	15400000	19900000	14500000	13300000	39500000	39200000	13800000	11500000	3530000	4250000	0.86:0.70:1.06:1.37:1.00:0.92:2.72:2.70:0.95:0.79:0.24:0.29	15400000	31200000	9690000	0.49:1.00:0.31	56823	Chromatiaceae	Thiobaca	NAD(P)-dependent nickel-iron dehydrogenase flavin-containing subunit OS=Thiobaca trueperi OX=127458 GN=EDC35_102476 PE=3 SV=1
2843	23224	tr|A0A0H5BHB9|A0A0H5BHB9_BLAVI	38.91	25	6	3	413000	380000	580000	952000	7440000	6350000	5770000	5190000	13800000	13100000	14000000	13000000	0.06:0.05:0.08:0.13:1.00:0.85:0.78:0.70:1.86:1.76:1.89:1.75	983000	6280000	13500000	0.16:1.00:2.15	37652	Blastochloridaceae	Blastochloris	Malyl-CoA lyase OS=Blastochloris viridis OX=1079 GN=mcl1 PE=3 SV=1
2947	950	tr|A0A4R3N3L0|A0A4R3N3L0_9GAMM	23.17	17	5	5	25100000	28600000	30400000	26700000	15300000	14900000	19000000	19400000	13800000	27600000	16200000	13500000	1.64:1.86:1.98:1.74:1.00:0.97:1.24:1.26:0.90:1.80:1.05:0.88	27700000	17100000	17700000	1.61:1.00:1.04	31830	Chromatiaceae	Thiobaca	Farnesyl-diphosphate synthase OS=Thiobaca trueperi OX=127458 GN=EDC35_10141 PE=3 SV=1
4781	55123	tr|A0A318TS17|A0A318TS17_9BRAD	40.31	15	2	2	3220000	3970000	4440000	4720000	5280000	5070000	6270000	6410000	13800000	12100000	11300000	10800000	0.61:0.75:0.84:0.89:1.00:0.96:1.19:1.21:2.60:2.29:2.13:2.04	4090000	5760000	12000000	0.71:1.00:2.08	20014	Bradyrhizobiaceae	Rhodopseudomonas	LPS-assembly lipoprotein OS=Rhodopseudomonas faecalis OX=99655 GN=BJ122_11291 PE=4 SV=1
4845	27616	tr|A0A318T7B6|A0A318T7B6_9BRAD	31.08	7	3	3	0	87700	88300	15100	154000	101000	0	211000	13800000	14600000	13500000	17400000	0:0.57:0.57:0.10:1.00:0.66:0:1.37:64.00:64.00:64.00:64.00	139000	188000	14800000	0.74:1.00:64.00	54697	Bradyrhizobiaceae	Rhodopseudomonas	Cytochrome c oxidase accessory protein FixG OS=Rhodopseudomonas faecalis OX=99655 GN=BJ122_12919 PE=4 SV=1
2040	22292	tr|A0A318TB05|A0A318TB05_9BRAD	23.91	23	6	6	2660000	2580000	45800	3400000	2060000	2690000	2480000	1100000	13700000	14000000	8060000	7300000	1.29:1.26:0.02:1.65:1.00:1.31:1.20:0.53:6.66:6.78:3.91:3.55	2440000	2340000	10800000	1.04:1.00:4.64	39269	Bradyrhizobiaceae	Rhodopseudomonas	N-ethylmaleimide reductase OS=Rhodopseudomonas faecalis OX=99655 GN=BJ122_13323 PE=4 SV=1
3500	9754	tr|A0A4R3N431|A0A4R3N431_9GAMM	40.35	25	4	4	29200000	31300000	24300000	24700000	27400000	26300000	35700000	30600000	13700000	12000000	10800000	10600000	1.06:1.14:0.88:0.90:1.00:0.96:1.30:1.12:0.50:0.44:0.39:0.39	28100000	30500000	11800000	0.92:1.00:0.39	17076	Chromatiaceae	Thiobaca	4-hydroxy-4-methyl-2-oxoglutarate aldolase OS=Thiobaca trueperi OX=127458 GN=EDC35_102434 PE=3 SV=1
4056	6891	tr|G2E2E5|G2E2E5_9GAMM	22.94	32	3	3	48500000	47300000	52200000	47000000	26700000	24200000	39200000	42200000	13700000	8510000	17100000	19100000	1.81:1.77:1.95:1.76:1.00:0.91:1.47:1.58:0.51:0.32:0.64:0.72	48800000	33100000	14900000	1.47:1.00:0.45	8747	Chromatiaceae	Thiorhodococcus	30S ribosomal protein S21 OS=Thiorhodococcus drewsii AZ1 OX=765913 GN=rpsU PE=3 SV=1
5503	17178	tr|A0A6I6EGF5|A0A6I6EGF5_THETI	29.33	3	2	2	14400000	15900000	17100000	13800000	7840000	10300000	9130000	9180000	13700000	13400000	16700000	15200000	1.84:2.03:2.18:1.77:1.00:1.32:1.17:1.17:1.75:1.71:2.13:1.94	15300000	9120000	14800000	1.68:1.00:1.62	36992	Chromatiaceae	Thermochromatium	S49 family peptidase OS=Thermochromatium tepidum ATCC 43061 OX=316276 GN=E6P07_04970 PE=4 SV=1
2042	22821	Q07UX6|SUCC_RHOP5	28.69	22	8	4	2870000	1630000	2620000	875000	2430000	1790000	1930000	1280000	13600000	15100000	8480000	6780000	1.18:0.67:1.08:0.36:1.00:0.74:0.79:0.53:5.60:6.20:3.48:2.79	2280000	2530000	11000000	0.90:1.00:4.34	42277	Bradyrhizobiaceae	Rhodopseudomonas	Succinate--CoA ligase [ADP-forming] subunit beta OS=Rhodopseudomonas palustris (strain BisA53) OX=316055 GN=sucC PE=3 SV=1
4296	57544	tr|A0A371XJ67|A0A371XJ67_9RHIZ	47.42	14	3	2	1430000	2160000	1600000	1410000	3670000	3940000	4040000	4000000	13600000	14200000	17100000	13300000	0.39:0.59:0.44:0.38:1.00:1.07:1.10:1.09:3.70:3.86:4.65:3.63	1690000	3980000	14500000	0.42:1.00:3.65	38452	Phyllobacteriaceae	Mesorhizobium	Fructose-1 6-bisphosphate aldolase OS=Mesorhizobium denitrificans OX=2294114 GN=DY251_00415 PE=3 SV=1
5529	34292	tr|A0A318T955|A0A318T955_9BRAD	32.49	31	2	2	33500	243000	214000	337000	166000	0	384000	374000	13600000	12200000	7540000	11300000	0.20:1.47:1.29:2.04:1.00:0:2.32:2.26:64.00:64.00:45.47:64.00	273000	308000	11200000	0.88:1.00:36.25	13408	Bradyrhizobiaceae	Rhodopseudomonas	Uncharacterized protein OS=Rhodopseudomonas faecalis OX=99655 GN=BJ122_1275 PE=4 SV=1
2743	24228	tr|A0A348G4T3|A0A348G4T3_9RHIZ	41.62	24	5	5	165000	84900	113000	0	16500000	16500000	7130000	6280000	13500000	13900000	9460000	10700000	0.02:0.02:0.02:0:1.00:1.00:0.43:0.38:0.81:0.84:0.57:0.65	121000	11600000	11900000	0.02:1.00:1.02	37841	Blastochloridaceae	Blastochloris	Uroporphyrinogen decarboxylase OS=Blastochloris tepida OX=2233851 GN=hemE PE=3 SV=1
4102	27815	tr|A0A318TT22|A0A318TT22_9BRAD	30.36	26	3	3	8310000	8130000	7030000	10800000	3800000	2610000	5060000	4960000	13500000	13900000	15900000	16100000	2.19:2.14:1.85:2.85:1.00:0.69:1.33:1.31:3.57:3.66:4.18:4.23	8820000	4110000	14800000	2.15:1.00:3.61	16304	Bradyrhizobiaceae	Rhodopseudomonas	Ribulose 1 5-bisphosphate carboxylase small subunit OS=Rhodopseudomonas faecalis OX=99655 GN=BJ122_110146 PE=4 SV=1
4171	27683	tr|A0A5M6HVF3|A0A5M6HVF3_9RHIZ	37.45	27	3	3	2670000	1140000	1280000	1300000	7600000	7080000	8030000	8160000	13500000	12300000	10900000	12600000	0.35:0.15:0.17:0.17:1.00:0.93:1.06:1.07:1.77:1.62:1.43:1.66	1710000	7850000	12500000	0.22:1.00:1.59	19422	Blastochloridaceae	Blastochloris	Damage-inducible protein DinB OS=Blastochloris sulfoviridis OX=50712 GN=F1193_11835 PE=3 SV=1
394	20734	tr|A0A318T9R5|A0A318T9R5_9BRAD	16.86	19	14	10	13000000	14700000	15200000	15400000	10400000	10300000	10800000	13000000	13400000	10600000	11800000	13400000	1.26:1.42:1.47:1.49:1.00:1.00:1.04:1.26:1.29:1.02:1.14:1.29	15000000	11100000	13100000	1.35:1.00:1.18	100456	Bradyrhizobiaceae	Rhodopseudomonas	Transaldolase OS=Rhodopseudomonas faecalis OX=99655 GN=tal PE=3 SV=1
2515	14945	tr|A0A2S7XUN9|A0A2S7XUN9_9GAMM	24.31	14	3	2	25300000	31900000	62700000	46400000	52800000	57900000	24200000	35300000	13400000	16400000	10400000	11400000	0.48:0.60:1.19:0.88:1.00:1.10:0.46:0.67:0.25:0.31:0.20:0.22	46500000	43200000	13300000	1.08:1.00:0.31	48663	Chromatiaceae	Chromatium	NAD(P) transhydrogenase subunit beta OS=Chromatium okenii OX=61644 GN=CXB77_04110 PE=3 SV=1
3977	24522	tr|A0A318TFT7|A0A318TFT7_9BRAD	43.3	7	4	4	1950000	2020000	2500000	2680000	4470000	5280000	3350000	4220000	13400000	12500000	11300000	8840000	0.44:0.45:0.56:0.60:1.00:1.18:0.75:0.94:3.00:2.79:2.53:1.98	2380000	4420000	11500000	0.54:1.00:2.60	82363	Bradyrhizobiaceae	Rhodopseudomonas	Malate dehydrogenase (Oxaloacetate-decarboxylating)(NADP+) OS=Rhodopseudomonas faecalis OX=99655 GN=BJ122_107147 PE=3 SV=1
5585	59510	tr|B0UMI5|B0UMI5_METS4	47.23	5	2	2	1510000	1380000	1520000	1300000	6120000	6350000	4470000	4930000	13400000	12500000	8290000	9650000	0.25:0.23:0.25:0.21:1.00:1.04:0.73:0.81:2.19:2.04:1.36:1.58	1480000	5470000	11000000	0.27:1.00:2.01	35209	Methylobacteriaceae	Methylobacterium	Fructose-1 6-bisphosphatase OS=Methylobacterium sp. (strain 4-46) OX=426117 GN=M446_2697 PE=3 SV=1
853	20845	tr|A0A2M8ZIH0|A0A2M8ZIH0_9BRAD	16.12	39	13	7	25000000	37500000	26700000	28800000	20500000	20300000	21900000	17800000	13300000	16100000	20400000	19900000	1.22:1.83:1.30:1.41:1.00:0.99:1.07:0.87:0.65:0.79:0.99:0.97	29500000	20100000	17900000	1.47:1.00:0.89	46668	Bradyrhizobiaceae	Afipia	ATP-dependent Clp protease ATP-binding subunit ClpX OS=Afipia broomeae OX=56946 GN=clpX PE=3 SV=1
1979	1550	tr|A0A4R3MUX8|A0A4R3MUX8_9GAMM	20.66	17	6	6	160000000	141000000	78700000	68100000	32900000	33200000	40400000	46000000	13300000	11700000	1550000	3430000	4.85:4.29:2.39:2.07:1.00:1.01:1.23:1.40:0.40:0.36:0.05:0.10	135000000	38700000	7530000	3.48:1.00:0.19	40848	Chromatiaceae	Thiobaca	Acetyl-CoA C-acetyltransferase OS=Thiobaca trueperi OX=127458 GN=EDC35_10661 PE=3 SV=1
2234	51405	tr|A0A2R4GTR7|A0A2R4GTR7_RHOPL	28.09	10	5	2	442000	600000	239000	144000	1260000	1140000	1210000	1490000	13300000	13700000	10300000	4980000	0.35:0.48:0.19:0.11:1.00:0.91:0.96:1.18:10.59:10.84:8.15:3.96	386000	1320000	10600000	0.29:1.00:7.98	61167	Bradyrhizobiaceae	Rhodopseudomonas	GMP synthase [glutamine-hydrolyzing] OS=Rhodopseudomonas palustris OX=1076 GN=guaA PE=3 SV=1
4428	26201	tr|A0A318TNN7|A0A318TNN7_9BRAD	0	10	2	2	398000	0	0	0	232000	648000	0	0	13300000	12300000	2940000	13200000	1.71:0:0:0:1.00:2.79:0:0:57.40:53.20:12.68:56.89	398000	440000	18800000	0.90:1.00:42.71	38219	Bradyrhizobiaceae	Rhodopseudomonas	Uncharacterized protein OS=Rhodopseudomonas faecalis OX=99655 GN=BJ122_101233 PE=4 SV=1
2297	22521	tr|A0A4R3MSH5|A0A4R3MSH5_9GAMM	11.46	15	7	7	13400000	12000000	11200000	8420000	8530000	8830000	11000000	10700000	13200000	12900000	11000000	12500000	1.57:1.40:1.32:0.99:1.00:1.03:1.29:1.26:1.54:1.51:1.29:1.46	11200000	9760000	12400000	1.15:1.00:1.27	68632	Chromatiaceae	Thiobaca	Arginine decarboxylase OS=Thiobaca trueperi OX=127458 GN=EDC35_10992 PE=3 SV=1
2945	59429	tr|A0A7C2DW56|A0A7C2DW56_9RHOB	19.58	21	3	3	29100000	19600000	20700000	26600000	12800000	13400000	23800000	19900000	13100000	12700000	13600000	14600000	2.27:1.53:1.62:2.07:1.00:1.04:1.86:1.55:1.02:0.99:1.06:1.14	24000000	17600000	13700000	1.36:1.00:0.78	15085	Rhodobacteraceae	0	Nucleoside diphosphate kinase OS=Rhodobacteraceae bacterium OX=1904441 GN=ndk PE=3 SV=1
4864	29036	tr|A0A318TJ91|A0A318TJ91_9BRAD	41.54	17	2	2	2710000	1920000	737000	738000	236000	168000	374000	336000	13100000	14200000	12700000	13900000	11.49:8.13:3.12:3.13:1.00:0.71:1.59:1.43:55.46:60.19:53.91:58.90	1540000	304000	13500000	5.05:1.00:44.28	12778	Bradyrhizobiaceae	Rhodopseudomonas	Uncharacterized protein DUF3597 OS=Rhodopseudomonas faecalis OX=99655 GN=BJ122_105175 PE=4 SV=1
5383	30666	tr|A0A318TH30|A0A318TH30_9BRAD	40.86	6	2	2	176000	612000	552000	454000	836000	698000	375000	540000	13100000	12400000	13100000	11500000	0.21:0.73:0.66:0.54:1.00:0.83:0.45:0.65:15.68:14.81:15.71:13.76	476000	682000	12500000	0.70:1.00:18.39	51097	Bradyrhizobiaceae	Rhodopseudomonas	Zinc protease OS=Rhodopseudomonas faecalis OX=99655 GN=BJ122_1043 PE=3 SV=1
516	1400	tr|A0A4V2V1Y6|A0A4V2V1Y6_9GAMM	32.97	27	13	13	68500000	68000000	65300000	74700000	62300000	64200000	46900000	55500000	13000000	11600000	19500000	18700000	1.10:1.09:1.05:1.20:1.00:1.03:0.75:0.89:0.21:0.19:0.31:0.30	69300000	57200000	15700000	1.21:1.00:0.27	63160	Chromatiaceae	Thiobaca	Glutamine--tRNA ligase OS=Thiobaca trueperi OX=127458 GN=glnS PE=3 SV=1
1391	12179	tr|A0A318TDT3|A0A318TDT3_9BRAD	5.39	20	7	3	10200000	7150000	8520000	13300000	7670000	7480000	12200000	1640000	13000000	13700000	10600000	9560000	1.33:0.93:1.11:1.73:1.00:0.97:1.59:0.21:1.70:1.78:1.38:1.25	9780000	7450000	11700000	1.31:1.00:1.57	58344	Bradyrhizobiaceae	Rhodopseudomonas	Light-independent protochlorophyllide reductase subunit B OS=Rhodopseudomonas faecalis OX=99655 GN=bchB PE=3 SV=1
1962	24299	tr|A0A127F3R2|A0A127F3R2_9RHIZ	46.9	18	6	2	325000	428000	576000	679000	606000	597000	1150000	1290000	12900000	13700000	11100000	9810000	0.54:0.71:0.95:1.12:1.00:0.99:1.89:2.13:21.35:22.62:18.41:16.19	502000	910000	11900000	0.55:1.00:13.07	37261	Hyphomicrobiaceae	Rhodoplanes	Ketol-acid reductoisomerase (NADP(+)) OS=Rhodoplanes sp. Z2-YC6860 OX=674703 GN=ilvC PE=3 SV=1
2855	25838	tr|A0A5M6I6E1|A0A5M6I6E1_9RHIZ	32.03	19	6	2	0	72000	163000	61500	3170000	2910000	3180000	2440000	12900000	9240000	10200000	6950000	0:0.02:0.05:0.02:1.00:0.92:1.00:0.77:4.07:2.91:3.21:2.19	184000	2930000	9820000	0.06:1.00:3.36	37406	Blastochloridaceae	Blastochloris	Aspartate-semialdehyde dehydrogenase OS=Blastochloris sulfoviridis OX=50712 GN=asd PE=3 SV=1
4711	24340	tr|A0A318TM29|A0A318TM29_9BRAD	44.33	15	3	3	162000	282000	386000	392000	186000	241000	586000	473000	12900000	14000000	11600000	10000000	0.87:1.52:2.08:2.11:1.00:1.30:3.16:2.55:64.00:64.00:62.61:53.85	338000	419000	12100000	0.81:1.00:28.98	42666	Bradyrhizobiaceae	Rhodopseudomonas	Glycolate oxidase FAD binding subunit OS=Rhodopseudomonas faecalis OX=99655 GN=BJ122_10946 PE=4 SV=1
2630	24091	tr|A0A318T7Y9|A0A318T7Y9_9BRAD	26.81	19	5	5	3880000	5380000	3050000	2850000	2210000	1130000	4230000	5380000	12800000	13300000	11100000	12100000	1.76:2.43:1.38:1.29:1.00:0.51:1.91:2.43:5.78:6.03:5.04:5.46	3950000	3360000	12300000	1.18:1.00:3.67	34822	Bradyrhizobiaceae	Rhodopseudomonas	Acetyl-coenzyme A carboxylase carboxyl transferase subunit alpha OS=Rhodopseudomonas faecalis OX=99655 GN=accA PE=3 SV=1
4729	27813	tr|A0A5M6I610|A0A5M6I610_9RHIZ	84.44	12	3	3	1030000000	951000000	970000000	842000000	946000000	814000000	803000000	825000000	12800000	12900000	15800000	14900000	1.08:1.01:1.03:0.89:1.00:0.86:0.85:0.87:0.02:0.02:0.02:0.02	947000000	847000000	14500000	1.12:1.00:0.02	28873	Blastochloridaceae	Blastochloris	Response regulator OS=Blastochloris sulfoviridis OX=50712 GN=F1193_01120 PE=4 SV=1
4933	62302	tr|A0A2T4JC21|A0A2T4JC21_RHOBL	25.07	33	3	3	562000	485000	101000	87800	0	0	0	0	12800000	9860000	15100000	14200000	64.00:64.00:64.00:64.00:-:-:-:-:64.00:64.00:64.00:64.00	540000	0	13000000	64.00:-:64.00	9694	Rhodobacteraceae	Rhodobacter	DNA-binding protein OS=Rhodobacter blasticus DSM 2131 OX=1188250 GN=C5F44_05530 PE=3 SV=1
2342	22898	tr|A0A5M6HZQ8|A0A5M6HZQ8_9RHIZ	71.03	14	7	5	97600000	90700000	116000000	102000000	127000000	112000000	116000000	122000000	12700000	10600000	10600000	11100000	0.77:0.71:0.91:0.80:1.00:0.88:0.92:0.96:0.10:0.08:0.08:0.09	101000000	119000000	11300000	0.85:1.00:0.09	72907	Blastochloridaceae	Blastochloris	NADH-quinone oxidoreductase OS=Blastochloris sulfoviridis OX=50712 GN=F1193_10020 PE=3 SV=1
4174	27751	tr|A0A0U5BV71|A0A0U5BV71_9GAMM	9.72	7	4	4	5600000	5740000	7420000	7450000	9800000	10700000	4080000	5730000	12500000	9130000	18500000	0	0.57:0.59:0.76:0.76:1.00:1.09:0.42:0.58:1.28:0.93:1.88:0	7570000	7570000	13400000	1.00:1.00:1.77	58888	Chromatiaceae	Thiocapsa	Glutamine-dependent NAD(+) synthetase OS=Thiocapsa sp. KS1 OX=610332 GN=nadE PE=3 SV=1
4072	24521	tr|A0A318TTA6|A0A318TTA6_9BRAD	12.4	11	4	3	4470000	3030000	3860000	5140000	2810000	3140000	5340000	6480000	12300000	11100000	8630000	4930000	1.59:1.08:1.37:1.83:1.00:1.12:1.90:2.31:4.39:3.93:3.07:1.76	4230000	4440000	9240000	0.95:1.00:2.08	49245	Bradyrhizobiaceae	Rhodopseudomonas	Glutathione reductase OS=Rhodopseudomonas faecalis OX=99655 GN=BJ122_102301 PE=3 SV=1
5206	61720	tr|A0A7X0IJW1|A0A7X0IJW1_9ACTN	26.56	5	2	2	545000	505000	0	89300	4520000	5360000	4130000	4460000	12200000	12100000	18600000	16900000	0.12:0.11:0:0.02:1.00:1.18:0.91:0.99:2.70:2.68:4.11:3.72	380000	4620000	15000000	0.08:1.00:3.24	36177	Streptosporangiaceae	Sphaerisporangium	Fructose-1 6-bisphosphatase II OS=Sphaerisporangium rubeum OX=321317 GN=BJ992_005719 PE=4 SV=1
1682	51450	tr|A0A318TFZ6|A0A318TFZ6_9BRAD	46.04	32	8	3	39600000	38900000	51100000	46000000	35100000	34700000	71300000	87200000	12100000	10600000	10500000	9890000	1.13:1.11:1.46:1.31:1.00:0.99:2.03:2.49:0.35:0.30:0.30:0.28	43900000	58100000	10800000	0.75:1.00:0.19	34905	Bradyrhizobiaceae	Rhodopseudomonas	Chlorophyllide reductase iron protein subunit X OS=Rhodopseudomonas faecalis OX=99655 GN=BJ122_110114 PE=3 SV=1
4850	28188	tr|A0A5M6HTQ0|A0A5M6HTQ0_9RHIZ	32.3	16	3	3	1660000	1910000	0	0	4640000	3990000	4090000	4240000	12100000	12600000	13400000	12800000	0.36:0.41:0:0:1.00:0.86:0.88:0.91:2.60:2.71:2.89:2.77	1900000	4350000	13000000	0.44:1.00:2.99	33457	Blastochloridaceae	Blastochloris	Complex I NDUFA9 subunit family protein OS=Blastochloris sulfoviridis OX=50712 GN=F1193_12530 PE=4 SV=1
2377	2866	tr|A0A6M0K206|A0A6M0K206_9GAMM	82.83	34	4	4	922000000	752000000	878000000	835000000	1080000000	974000000	1390000000	1350000000	12000000	12700000	14200000	14500000	0.85:0.70:0.81:0.77:1.00:0.90:1.29:1.25:0.02:0.02:0.02:0.02	847000000	1200000000	13300000	0.71:1.00:0.02	7729	Chromatiaceae	Thiorhodococcus	Cold shock domain-containing protein OS=Thiorhodococcus minor OX=57489 GN=G3446_15965 PE=4 SV=1
2392	22700	tr|A0A318TR46|A0A318TR46_9BRAD	47.61	18	7	5	889000	969000	379000	272000	328000	296000	549000	472000	12000000	8450000	8120000	11400000	2.71:2.95:1.15:0.83:1.00:0.90:1.67:1.44:36.69:25.73:24.74:34.64	676000	468000	10000000	1.45:1.00:21.36	60316	Bradyrhizobiaceae	Rhodopseudomonas	CTP synthase OS=Rhodopseudomonas faecalis OX=99655 GN=pyrG PE=3 SV=1
994	20992	tr|A0A348G4D6|A0A348G4D6_9RHIZ	28.18	10	7	3	1610000	1170000	506000	815000	1480000	3030000	1710000	1410000	11900000	12800000	5370000	6810000	1.09:0.79:0.34:0.55:1.00:2.04:1.16:0.95:8.03:8.65:3.62:4.60	1110000	2040000	9230000	0.54:1.00:4.53	111393	Blastochloridaceae	Blastochloris	Alpha-ketoglutarate dehydrogenase OS=Blastochloris tepida OX=2233851 GN=sucA PE=4 SV=1
1835	52647	tr|A0A3A8BBK8|A0A3A8BBK8_9RHOB	12.05	15	9	2	7990000	7300000	6170000	5480000	4680000	4540000	2350000	2960000	11900000	399000	11700000	12800000	1.71:1.56:1.32:1.17:1.00:0.97:0.50:0.63:2.54:0.09:2.51:2.74	6730000	3750000	9390000	1.80:1.00:2.51	42765	Roseobacteraceae	Roseovarius	S-adenosylmethionine synthase OS=Roseovarius spongiae OX=2320272 GN=metK PE=3 SV=1
1949	4065	tr|A0A5M6HVL5|A0A5M6HVL5_9RHIZ	49.6	13	5	4	132000000	138000000	110000000	95900000	46500000	37200000	69900000	58900000	11900000	12900000	15900000	16700000	2.84:2.96:2.37:2.06:1.00:0.80:1.50:1.27:0.26:0.28:0.34:0.36	119000000	53300000	14400000	2.24:1.00:0.27	67486	Blastochloridaceae	Blastochloris	Methyl-accepting chemotaxis protein OS=Blastochloris sulfoviridis OX=50712 GN=F1193_11115 PE=4 SV=1
2586	3034	tr|A0A4R3N663|A0A4R3N663_9GAMM	46.37	17	6	6	32300000	33400000	35800000	36600000	61700000	60500000	45600000	49100000	11900000	10700000	13700000	13000000	0.52:0.54:0.58:0.59:1.00:0.98:0.74:0.80:0.19:0.17:0.22:0.21	34800000	54200000	12800000	0.64:1.00:0.24	42323	Chromatiaceae	Thiobaca	1-deoxy-D-xylulose 5-phosphate reductoisomerase OS=Thiobaca trueperi OX=127458 GN=dxr PE=3 SV=1
3408	52731	tr|Q89FK5|Q89FK5_BRADU	23.13	12	4	4	1300000	1420000	569000	223000	960000	1230000	398000	86500	11900000	14200000	6920000	4580000	1.35:1.48:0.59:0.23:1.00:1.28:0.42:0.09:12.38:14.83:7.21:4.78	937000	922000	9400000	1.02:1.00:10.20	35188	Bradyrhizobiaceae	Bradyrhizobium	Blr6694 protein OS=Bradyrhizobium diazoefficiens (strain JCM 10833 / BCRC 13528 / IAM 13628 / NBRC 14792 / USDA 110) OX=224911 GN=blr6694 PE=4 SV=1
4078	25353	tr|Q137S8|Q137S8_RHOPS	28.54	18	5	2	0	187000	276000	0	3920000	4000000	8140	51700	11800000	11000000	6850000	10100000	0:0.05:0.07:0:1.00:1.02:0.02:0.02:3.01:2.82:1.75:2.59	259000	1990000	10100000	0.13:1.00:5.06	48797	Bradyrhizobiaceae	Rhodopseudomonas	Biotin carboxylase OS=Rhodopseudomonas palustris (strain BisB5) OX=316057 GN=RPD_2431 PE=4 SV=1
5248	29456	tr|A0A318TSL6|A0A318TSL6_9BRAD	33.89	9	2	2	934000	407000	700000	199000	2950000	3400000	2480000	1520000	11800000	15000000	13300000	11900000	0.32:0.14:0.24:0.07:1.00:1.15:0.84:0.52:4.01:5.09:4.50:4.03	1010000	2690000	14300000	0.38:1.00:5.31	29404	Bradyrhizobiaceae	Rhodopseudomonas	Hydroxypyruvate isomerase OS=Rhodopseudomonas faecalis OX=99655 GN=BJ122_10260 PE=3 SV=1
4038	2607	tr|L0H1U0|L0H1U0_9GAMM	50.67	7	4	4	114000000	92800000	117000000	103000000	110000000	75900000	88700000	86700000	11600000	14200000	17500000	16100000	1.04:0.85:1.07:0.94:1.00:0.69:0.81:0.79:0.11:0.13:0.16:0.15	107000000	90300000	15000000	1.19:1.00:0.17	48381	Chromatiaceae	Thioflavicoccus	Protein translocase subunit SecY OS=Thioflavicoccus mobilis 8321 OX=765912 GN=secY PE=3 SV=1
60	84	tr|A0A4R3N3Y9|A0A4R3N3Y9_9GAMM	42.54	28	20	9	46900000	44400000	56200000	54900000	15300000	14600000	15400000	14400000	11500000	14000000	9670000	9370000	3.07:2.91:3.68:3.60:1.00:0.96:1.01:0.94:0.75:0.92:0.63:0.61	50600000	15100000	12300000	3.36:1.00:0.82	98867	Chromatiaceae	Thiobaca	Pyruvate dehydrogenase E1 component OS=Thiobaca trueperi OX=127458 GN=EDC35_101182 PE=4 SV=1
3280	3035	tr|A0A4R3MRY3|A0A4R3MRY3_9GAMM	60.87	23	4	4	131000000	146000000	176000000	156000000	94000000	86700000	153000000	152000000	11500000	14100000	12000000	10800000	1.40:1.56:1.87:1.66:1.00:0.92:1.63:1.62:0.12:0.15:0.13:0.11	152000000	121000000	12100000	1.25:1.00:0.10	17445	Chromatiaceae	Thiobaca	ATP synthase subunit b OS=Thiobaca trueperi OX=127458 GN=atpF PE=3 SV=1
3294	10312	tr|A0A318TN74|A0A318TN74_9BRAD	0	34	4	2	0	20700	0	0	344000	225000	0	86800	11500000	11200000	4450000	5140000	0:0.06:0:0:1.00:0.65:0:0.25:33.47:32.55:12.93:14.94	20700	218000	8070000	0.09:1.00:36.95	26622	Bradyrhizobiaceae	Rhodopseudomonas	Molybdenum cofactor synthesis domain-containing protein OS=Rhodopseudomonas faecalis OX=99655 GN=BJ122_10157 PE=4 SV=1
3899	27557	tr|A0A0H5BFI7|A0A0H5BFI7_BLAVI	34.2	10	4	3	2060000	1760000	1330000	1980000	13500000	12100000	6610000	9890000	11500000	17500000	5000000	8720000	0.15:0.13:0.10:0.15:1.00:0.90:0.49:0.73:0.85:1.30:0.37:0.65	2140000	10500000	10700000	0.20:1.00:1.01	24787	Blastochloridaceae	Blastochloris	50S ribosomal protein L5 OS=Blastochloris viridis OX=1079 GN=rplE PE=3 SV=1
5	20520	tr|A0A0H5BFK2|A0A0H5BFK2_BLAVI	12.45	32	36	5	1620000	2480000	55400	287000	10400000	10100000	7460000	6030000	11400000	12700000	8040000	7490000	0.16:0.24:0.02:0.03:1.00:0.97:0.72:0.58:1.10:1.22:0.77:0.72	1940000	8490000	10300000	0.23:1.00:1.21	153279	Blastochloridaceae	Blastochloris	DNA-directed RNA polymerase subunit beta OS=Blastochloris viridis OX=1079 GN=rpoB_1 PE=3 SV=1
827	1039	tr|A0A4R3MQP0|A0A4R3MQP0_9GAMM	50.32	35	10	5	115000000	127000000	126000000	116000000	152000000	146000000	164000000	146000000	11400000	6720000	6160000	8860000	0.76:0.84:0.83:0.76:1.00:0.96:1.08:0.96:0.07:0.04:0.04:0.06	121000000	152000000	8280000	0.80:1.00:0.05	43343	Chromatiaceae	Thiobaca	Geranylgeranyl reductase OS=Thiobaca trueperi OX=127458 GN=EDC35_11342 PE=3 SV=1
1466	22852	tr|A0A3S0DPR6|A0A3S0DPR6_9BRAD	70.26	14	8	2	280000000	327000000	384000000	378000000	274000000	321000000	223000000	229000000	11300000	13700000	11600000	11000000	1.02:1.19:1.40:1.38:1.00:1.17:0.81:0.84:0.04:0.05:0.04:0.04	342000000	262000000	11900000	1.31:1.00:0.05	64503	Bradyrhizobiaceae	0	Acetolactate synthase OS=Bradyrhizobiaceae bacterium OX=2072420 GN=EKK40_18595 PE=3 SV=1
2296	22494	tr|A0A5M6I3V4|A0A5M6I3V4_9RHIZ	44.04	30	7	6	57300000	62900000	81400000	86100000	33800000	39100000	47700000	55700000	11300000	11100000	10500000	9990000	1.70:1.86:2.41:2.55:1.00:1.16:1.41:1.65:0.33:0.33:0.31:0.30	72200000	44100000	10700000	1.64:1.00:0.24	35062	Blastochloridaceae	Blastochloris	Ubiquinone biosynthesis protein UbiU OS=Blastochloris sulfoviridis OX=50712 GN=ubiU PE=3 SV=1
2457	568	tr|A0A4R3N468|A0A4R3N468_9GAMM	50.52	29	6	6	23900000	22700000	24600000	21800000	18900000	16400000	19400000	19900000	11300000	10400000	9730000	9840000	1.27:1.20:1.30:1.16:1.00:0.87:1.03:1.05:0.60:0.55:0.52:0.52	23300000	18600000	10300000	1.25:1.00:0.55	27018	Chromatiaceae	Thiobaca	NADH dehydrogenase I subunit G OS=Thiobaca trueperi OX=127458 GN=EDC35_102474 PE=4 SV=1
4198	34293	tr|A0A5M6I5D7|A0A5M6I5D7_9RHIZ	31.2	42	3	3	1010000	1190000	2020000	1930000	4800000	5540000	6840000	7520000	11300000	6920000	14000000	14200000	0.21:0.25:0.42:0.40:1.00:1.16:1.42:1.57:2.35:1.44:2.91:2.96	1540000	6180000	11600000	0.25:1.00:1.88	11149	Blastochloridaceae	Blastochloris	Nucleoid-associated protein F1193_02000 OS=Blastochloris sulfoviridis OX=50712 GN=F1193_02000 PE=3 SV=1
4498	27336	tr|A0A318TJJ4|A0A318TJJ4_9BRAD	34.28	13	3	3	503000	742000	651000	826000	1350000	734000	1430000	454000	11300000	8230000	6610000	4440000	0.37:0.55:0.48:0.61:1.00:0.54:1.06:0.34:8.34:6.09:4.89:3.28	1100000	1670000	8220000	0.66:1.00:4.94	41045	Bradyrhizobiaceae	Rhodopseudomonas	Phospholipid/cholesterol/gamma-HCH transport system permease protein OS=Rhodopseudomonas faecalis OX=99655 GN=BJ122_11565 PE=3 SV=1
746	51436	tr|A0A2T0NLA0|A0A2T0NLA0_RHITR	35.02	33	9	2	311000	232000	295000	216000	231000	365000	618000	367000	11200000	5040000	3790000	4270000	1.35:1.01:1.28:0.94:1.00:1.59:2.68:1.59:48.72:21.86:16.42:18.51	263000	395000	6510000	0.67:1.00:16.48	40438	Rhizobiaceae	Rhizobium	Acetyl-CoA acetyltransferase OS=Rhizobium tropici OX=398 GN=NA75_12339 PE=3 SV=1
1306	21865	tr|A0A5M6I131|A0A5M6I131_9RHIZ	28.78	16	8	2	33500000	29300000	50800000	37600000	25500000	31700000	45600000	43500000	11200000	9730000	8890000	5030000	1.31:1.15:1.99:1.47:1.00:1.24:1.79:1.70:0.44:0.38:0.35:0.20	37800000	36600000	8700000	1.03:1.00:0.24	61241	Blastochloridaceae	Blastochloris	Transcription termination/antitermination protein NusA OS=Blastochloris sulfoviridis OX=50712 GN=nusA PE=3 SV=1
2508	7488	tr|A0A7C5N0M0|A0A7C5N0M0_9RHIZ	34.25	5	6	2	2240000	1920000	722000	832000	3080000	2830000	3840000	4120000	11200000	10300000	8070000	8680000	0.73:0.62:0.23:0.27:1.00:0.92:1.25:1.34:3.63:3.33:2.62:2.82	1430000	3470000	9550000	0.41:1.00:2.76	172123	Devosiaceae	Devosia	Glutamate synthase large subunit OS=Devosia sp. OX=1871048 GN=gltB PE=3 SV=1
4878	32269	tr|A0A318TKY6|A0A318TKY6_9BRAD	11.63	11	2	2	13500000	13600000	14600000	12700000	7390000	7600000	9820000	13700000	11200000	10700000	4370000	3870000	1.82:1.85:1.97:1.72:1.00:1.03:1.33:1.85:1.52:1.45:0.59:0.52	14000000	11200000	10100000	1.26:1.00:0.91	35972	Bradyrhizobiaceae	Rhodopseudomonas	Uncharacterized protein OS=Rhodopseudomonas faecalis OX=99655 GN=BJ122_103144 PE=4 SV=1
3749	26796	tr|A0A327JXC8|A0A327JXC8_9RHIZ	9.11	16	3	3	0	13600	1080000	229000	4540000	2120000	0	0	11100000	12000000	12100000	9710000	0:0.02:0.24:0.05:1.00:0.47:0:0:2.45:2.64:2.67:2.14	659000	3330000	11200000	0.20:1.00:3.38	26320	Hyphomicrobiaceae	Rhodoplanes	Acetoacetyl-CoA reductase OS=Rhodoplanes piscinae OX=444923 GN=phaB PE=3 SV=1
4204	53833	tr|A0A2T4J4F8|A0A2T4J4F8_RHOBL	2.21	28	3	3	9530000	5330000	17600000	13300000	7450000	7410000	7490000	8810000	11100000	8800000	6540000	6380000	1.28:0.71:2.37:1.78:1.00:0.99:1.01:1.18:1.49:1.18:0.88:0.86	11400000	7860000	8200000	1.46:1.00:1.04	12579	Rhodobacteraceae	Rhodobacter	Uncharacterized protein OS=Rhodobacter blasticus DSM 2131 OX=1188250 GN=C5F44_16665 PE=4 SV=1
1708	22249	tr|A0A318T944|A0A318T944_9BRAD	20.45	37	8	6	2450000	2110000	1560000	510000	228000	72900	1930000	1940000	10900000	10900000	9630000	8590000	10.75:9.26:6.86:2.24:1.00:0.32:8.47:8.52:48.09:47.79:42.33:37.74	1990000	1160000	10000000	1.71:1.00:8.61	36000	Bradyrhizobiaceae	Rhodopseudomonas	Putative dehydrogenase OS=Rhodopseudomonas faecalis OX=99655 GN=BJ122_12044 PE=4 SV=1
1894	22305	tr|Q07S26|Q07S26_RHOP5	20.76	16	6	3	125000	256000	588000	1040000	243000	2270000	149000	0	10800000	10100000	8810000	15400000	0.52:1.05:2.42:4.28:1.00:9.33:0.61:0:44.35:41.36:36.24:63.42	502000	1470000	11300000	0.34:1.00:7.69	36987	Bradyrhizobiaceae	Rhodopseudomonas	Mg-protoporphyrin IX chelatase OS=Rhodopseudomonas palustris (strain BisA53) OX=316055 GN=RPE_1306 PE=3 SV=1
5553	38062	tr|A0A4R3MXY6|A0A4R3MXY6_9GAMM	10.97	12	2	2	13600000	12700000	13700000	13300000	7540000	4850000	19700000	19300000	10800000	1300000	1720000	2130000	1.81:1.69:1.82:1.77:1.00:0.64:2.61:2.56:1.43:0.17:0.23:0.28	13300000	16700000	3980000	0.80:1.00:0.24	19444	Chromatiaceae	Thiobaca	Uncharacterized protein OS=Thiobaca trueperi OX=127458 GN=EDC35_105116 PE=4 SV=1
1578	21960	tr|A0A363TZ41|A0A363TZ41_9BRAD	34.3	20	7	2	1210000	1520000	392000	542000	2230000	2350000	3290000	3700000	10700000	13200000	8950000	8710000	0.54:0.68:0.18:0.24:1.00:1.05:1.47:1.66:4.80:5.91:4.00:3.90	1230000	3190000	10400000	0.39:1.00:3.26	47395	Bradyrhizobiaceae	0	Transcription termination factor Rho OS=Bradyrhizobiaceae bacterium OX=2072420 GN=rho PE=3 SV=1
2897	22736	tr|A0A318TJU4|A0A318TJU4_9BRAD	6.23	12	6	6	10300000	10000000	9320000	11500000	10500000	10200000	11700000	11700000	10700000	10500000	16400000	16500000	0.98:0.96:0.89:1.09:1.00:0.97:1.11:1.11:1.02:1.00:1.56:1.57	10300000	11000000	13500000	0.93:1.00:1.23	56983	Bradyrhizobiaceae	Rhodopseudomonas	DUF853 domain-containing protein OS=Rhodopseudomonas faecalis OX=99655 GN=BJ122_102130 PE=4 SV=1
3890	25033	tr|A0A5M6HUG9|A0A5M6HUG9_9RHIZ	25.26	6	3	3	29000	24800	379000	29900	6210000	1850000	5410000	5060000	10700000	2620000	11600000	5180000	0.02:0.02:0.06:0.02:1.00:0.30:0.87:0.81:1.73:0.42:1.86:0.83	116000	5380000	9160000	0.02:1.00:1.70	57472	Blastochloridaceae	Blastochloris	(R)-citramalate synthase OS=Blastochloris sulfoviridis OX=50712 GN=F1193_12750 PE=3 SV=1
4880	32866	tr|A0A7W7Z726|A0A7W7Z726_9BRAD	52.16	27	3	3	1770000	1740000	1240000	1140000	1000000	1020000	940000	1060000	10700000	11800000	9480000	8550000	1.76:1.73:1.24:1.14:1.00:1.02:0.94:1.06:10.66:11.76:9.44:8.51	1470000	1010000	10100000	1.46:1.00:10.06	11120	Bradyrhizobiaceae	Rhodopseudomonas	Large subunit ribosomal protein L28 OS=Rhodopseudomonas rhenobacensis OX=87461 GN=HNR60_003777 PE=4 SV=1
5272	54257	tr|A0A2T4JFE5|A0A2T4JFE5_RHOBL	27.5	7	2	2	8090000	7850000	6840000	6820000	2140000	2130000	93100	56400	10700000	11800000	10400000	10700000	3.77:3.66:3.19:3.18:1.00:0.99:0.04:0.03:4.99:5.52:4.87:5.00	7400000	1120000	10900000	6.60:1.00:9.74	45402	Rhodobacteraceae	Rhodobacter	Sugar ABC transporter substrate-binding protein OS=Rhodobacter blasticus DSM 2131 OX=1188250 GN=C5F44_01835 PE=3 SV=1
1407	22156	tr|A0A318TCC0|A0A318TCC0_9BRAD	10.88	27	8	8	11200000	14100000	24500000	20400000	7690000	11300000	9170000	9810000	10600000	11900000	6280000	9640000	1.46:1.83:3.19:2.65:1.00:1.47:1.19:1.28:1.38:1.55:0.82:1.25	17600000	9590000	10200000	1.83:1.00:1.06	52716	Bradyrhizobiaceae	Rhodopseudomonas	Succinate semialdehyde dehydrogenase OS=Rhodopseudomonas faecalis OX=99655 GN=BJ122_1215 PE=3 SV=1
2330	3364	tr|A0A4R3MZU8|A0A4R3MZU8_9GAMM	36.13	17	6	6	21100000	21200000	19500000	18600000	24600000	22300000	25100000	26900000	10600000	10700000	8330000	7810000	0.86:0.86:0.79:0.75:1.00:0.91:1.02:1.09:0.43:0.43:0.34:0.32	20100000	24700000	9370000	0.81:1.00:0.38	50326	Chromatiaceae	Thiobaca	Microcin-processing peptidase 2 OS=Thiobaca trueperi OX=127458 GN=EDC35_104264 PE=3 SV=1
4500	27468	tr|A0A4R4A9E9|A0A4R4A9E9_MARGR	32.53	21	3	3	44700000	50000000	32400000	39400000	11600000	12100000	16800000	17500000	10600000	9420000	3920000	5260000	3.85:4.31:2.79:3.40:1.00:1.04:1.45:1.51:0.91:0.81:0.34:0.45	41600000	14700000	7340000	2.84:1.00:0.50	20051	Chromatiaceae	0	Glutathione peroxidase OS=Marichromatium gracile OX=1048 GN=EDC29_106117 PE=3 SV=1 Glutathione peroxidase OS=Thiobaca trueperi OX=127458 GN=EDC35_108211 PE=3 SV=1
11	14	tr|A0A4R3N2P2|A0A4R3N2P2_9GAMM	51.19	61	29	18	274000000	289000000	248000000	245000000	339000000	337000000	283000000	291000000	10500000	7280000	5270000	10200000	0.81:0.85:0.73:0.72:1.00:1.00:0.83:0.86:0.03:0.02:0.02:0.03	264000000	312000000	9030000	0.85:1.00:0.03	59474	Chromatiaceae	Thiobaca	Phosphoenolpyruvate carboxykinase (ATP) OS=Thiobaca trueperi OX=127458 GN=pckA PE=3 SV=1
1669	3465	tr|A0A0U5IL12|A0A0U5IL12_9GAMM	39.04	20	7	3	43400000	48800000	40300000	45100000	51700000	51500000	42100000	41300000	10500000	9470000	6810000	6190000	0.84:0.94:0.78:0.87:1.00:1.00:0.81:0.80:0.20:0.18:0.13:0.12	44400000	46700000	8230000	0.95:1.00:0.18	50586	Chromatiaceae	Thiocapsa	Biotin carboxylase OS=Thiocapsa sp. KS1 OX=610332 GN=accC PE=4 SV=1
3181	24599	tr|A0A5M6HUS9|A0A5M6HUS9_9RHIZ	1.58	24	6	6	16600000	928000	10900000	3050000	6260000	6600000	11600000	12000000	10500000	9350000	7670000	8210000	2.66:0.15:1.74:0.49:1.00:1.05:1.85:1.92:1.68:1.49:1.22:1.31	9020000	9110000	8940000	0.99:1.00:0.98	41932	Blastochloridaceae	Blastochloris	FAD-dependent oxidoreductase OS=Blastochloris sulfoviridis OX=50712 GN=F1193_11745 PE=4 SV=1
3242	24790	tr|A0A0H5BER3|A0A0H5BER3_BLAVI	47.96	13	4	3	3250000	3810000	1050000	5180000	1990000	2130000	2340000	1650000	10500000	13600000	12800000	12700000	1.63:1.92:0.53:2.60:1.00:1.07:1.18:0.83:5.26:6.83:6.42:6.41	3340000	2200000	12500000	1.52:1.00:5.68	46975	Blastochloridaceae	Blastochloris	Alcohol dehydrogenase OS=Blastochloris viridis OX=1079 GN=BV133_1253 PE=4 SV=1
3520	37962	tr|A0A4R3N0U7|A0A4R3N0U7_9GAMM	32.09	18	3	3	27300000	28400000	26500000	26600000	15100000	14700000	28100000	26300000	10500000	9520000	7560000	7280000	1.80:1.88:1.75:1.76:1.00:0.97:1.86:1.74:0.70:0.63:0.50:0.48	27200000	21000000	8720000	1.29:1.00:0.41	18998	Chromatiaceae	Thiobaca	3-hydroxyacyl-[acyl-carrier-protein] dehydratase FabZ OS=Thiobaca trueperi OX=127458 GN=fabZ PE=3 SV=1
1402	3447	tr|I3Y7R7|I3Y7R7_THIV6	4.34	15	7	2	1440000	909000	4970000	7630000	2270000	3490000	7060000	10100000	10400000	9880000	10100000	2520000	0.63:0.40:2.19:3.36:1.00:1.54:3.11:4.44:4.57:4.35:4.46:1.11	4170000	5730000	8590000	0.73:1.00:1.50	64844	Chromatiaceae	Thiocystis	Acetolactate synthase OS=Thiocystis violascens (strain ATCC 17096 / DSM 198 / 6111) OX=765911 GN=Thivi_1004 PE=3 SV=1
2020	22554	tr|A0A318TEV6|A0A318TEV6_9BRAD	46.54	21	8	8	1270000	1350000	726000	702000	1760000	1220000	1770000	1290000	10400000	9740000	8030000	9710000	0.72:0.77:0.41:0.40:1.00:0.69:1.00:0.73:5.93:5.54:4.56:5.52	1180000	1510000	9480000	0.78:1.00:6.26	49357	Bradyrhizobiaceae	Rhodopseudomonas	Indole-3-acetamide hydrolase OS=Rhodopseudomonas faecalis OX=99655 GN=BJ122_11818 PE=3 SV=1
249	251	tr|A0A4R3N4A7|A0A4R3N4A7_9GAMM	13.85	17	16	4	8230000	5600000	13000000	12700000	13400000	13800000	11500000	11000000	10200000	9400000	10300000	8870000	0.62:0.42:0.97:0.95:1.00:1.03:0.86:0.82:0.76:0.70:0.77:0.66	10000000	12400000	10000000	0.81:1.00:0.81	107589	Chromatiaceae	Thiobaca	Ribonuclease E OS=Thiobaca trueperi OX=127458 GN=rne PE=3 SV=1
2286	2661	tr|A0A4R3N7P7|A0A4R3N7P7_9GAMM	40.56	23	7	4	19300000	19600000	21800000	21600000	11900000	12400000	11500000	11500000	10200000	1980000	7340000	5720000	1.63:1.66:1.84:1.82:1.00:1.04:0.97:0.97:0.86:0.17:0.62:0.48	20600000	11800000	6300000	1.75:1.00:0.53	47772	Chromatiaceae	Thiobaca	NADH-quinone oxidoreductase subunit D OS=Thiobaca trueperi OX=127458 GN=nuoD PE=3 SV=1
3265	52762	tr|H0SAI1|H0SAI1_BRAS3	20.56	11	4	2	617000	0	0	114000	145000	187000	0	0	10200000	7990000	3690000	7250000	4.26:0:0:0.79:1.00:1.29:0:0:64.00:55.17:25.48:50.08	731000	166000	7990000	4.40:1.00:48.12	49670	Bradyrhizobiaceae	Bradyrhizobium	Proline--tRNA ligase OS=Bradyrhizobium sp. (strain ORS 375) OX=566679 GN=proS PE=3 SV=1 Proline--tRNA ligase OS=Bradyrhizobium erythrophlei OX=1437360 GN=proS PE=3 SV=1
4157	25357	tr|A0A318TLT8|A0A318TLT8_9BRAD	50.61	24	4	4	36700000	29600000	37900000	34100000	20100000	20000000	24200000	26800000	10200000	8580000	10200000	9620000	1.83:1.48:1.89:1.70:1.00:1.00:1.21:1.34:0.51:0.43:0.51:0.48	35100000	23900000	9650000	1.47:1.00:0.40	23176	Bradyrhizobiaceae	Rhodopseudomonas	NADH-quinone oxidoreductase subunit C OS=Rhodopseudomonas faecalis OX=99655 GN=nuoC PE=3 SV=1
4471	5582	tr|A0A4R3MUW6|A0A4R3MUW6_9GAMM	8.8	11	3	3	15300000	11500000	7420000	7600000	4500000	5100000	8330000	7030000	10200000	939000	8670000	542000	3.39:2.55:1.65:1.69:1.00:1.13:1.85:1.56:2.28:0.21:1.93:0.12	10800000	6260000	5100000	1.73:1.00:0.81	35912	Chromatiaceae	Thiobaca	Transaldolase OS=Thiobaca trueperi OX=127458 GN=tal PE=3 SV=1
4838	10449	tr|V4JLQ0|V4JLQ0_9GAMM	15.21	29	2	2	22100000	26100000	61800000	60700000	32900000	29300000	66600000	58600000	10200000	10600000	1580000	1250000	0.67:0.79:1.88:1.84:1.00:0.89:2.02:1.78:0.31:0.32:0.05:0.04	42700000	47700000	5900000	0.89:1.00:0.12	8829	Chromatiaceae	Thiohalocapsa	Translational regulator CsrA OS=Thiohalocapsa sp. PB-PSB1 OX=1385625 GN=csrA PE=3 SV=1
5526	33803	tr|A0A5M6I4L4|A0A5M6I4L4_9RHIZ	22.21	9	2	2	203000	1800000	0	0	1710000	1660000	1170000	1680000	10200000	7910000	9930000	9350000	0.12:1.05:0:0:1.00:0.97:0.68:0.98:5.94:4.62:5.80:5.46	1000000	1600000	9340000	0.62:1.00:5.83	32883	Blastochloridaceae	Blastochloris	P1 family peptidase OS=Blastochloris sulfoviridis OX=50712 GN=F1193_04340 PE=3 SV=1
134	47	tr|A0A318T6U8|A0A318T6U8_9BRAD	26.89	42	20	15	104000000	101000000	44600000	44400000	4910000	5980000	7480000	2460000	10100000	7500000	9690000	9910000	21.25:20.65:9.07:9.04:1.00:1.22:1.52:0.50:2.07:1.53:1.97:2.02	73700000	6870000	10400000	10.72:1.00:1.51	84247	Bradyrhizobiaceae	Rhodopseudomonas	Xanthine dehydrogenase molybdenum binding subunit apoprotein OS=Rhodopseudomonas faecalis OX=99655 GN=BJ122_13620 PE=4 SV=1
1929	23658	tr|A0A4R3MZI2|A0A4R3MZI2_9GAMM	34.81	25	6	6	32100000	36000000	30300000	31600000	26500000	26700000	29900000	31000000	10100000	10700000	8000000	6290000	1.21:1.36:1.15:1.19:1.00:1.01:1.13:1.17:0.38:0.41:0.30:0.24	32500000	28500000	8800000	1.14:1.00:0.31	38094	Chromatiaceae	Thiobaca	CRISPR-associated Csy3 family protein OS=Thiobaca trueperi OX=127458 GN=EDC35_10690 PE=4 SV=1
2013	2901	tr|A0A2S7XQL0|A0A2S7XQL0_9GAMM	28.56	25	6	5	100000000	100000000	106000000	97900000	62000000	68100000	72100000	76800000	10100000	11700000	1530000	1960000	1.61:1.61:1.71:1.58:1.00:1.10:1.16:1.24:0.16:0.19:0.02:0.03	101000000	69800000	6300000	1.45:1.00:0.09	23331	Chromatiaceae	Chromatium	50S ribosomal protein L3 OS=Chromatium okenii OX=61644 GN=rplC PE=3 SV=1
2911	24128	tr|A0A318TBA4|A0A318TBA4_9BRAD	7.02	25	5	5	10000000	10800000	12100000	15500000	6940000	5880000	10400000	10600000	10100000	12400000	12100000	11300000	1.44:1.56:1.74:2.24:1.00:0.85:1.50:1.53:1.46:1.79:1.74:1.62	12100000	8470000	11500000	1.43:1.00:1.36	34021	Bradyrhizobiaceae	Rhodopseudomonas	NADPH:quinone reductase-like Zn-dependent oxidoreductase OS=Rhodopseudomonas faecalis OX=99655 GN=BJ122_1166 PE=4 SV=1
4160	26003	tr|A0A318T8P0|A0A318T8P0_9BRAD	52.12	8	3	2	1220000	446000	191000	870000	1000000	868000	1230000	1120000	10100000	11200000	9090000	8320000	1.22:0.45:0.19:0.87:1.00:0.87:1.22:1.12:10.05:11.23:9.08:8.31	756000	1050000	10400000	0.72:1.00:9.84	44698	Bradyrhizobiaceae	Rhodopseudomonas	Aspartokinase OS=Rhodopseudomonas faecalis OX=99655 GN=BJ122_12162 PE=3 SV=1
3305	24411	tr|A0A5M6HUP1|A0A5M6HUP1_9RHIZ	32.1	10	5	2	269000000	303000000	275000000	272000000	207000000	212000000	399000000	399000000	10000000	10100000	7280000	3010000	1.30:1.47:1.33:1.32:1.00:1.03:1.93:1.93:0.05:0.05:0.04:0.02	280000000	304000000	9040000	0.92:1.00:0.03	67023	Blastochloridaceae	Blastochloris	Aspartate--tRNA(Asp/Asn) ligase OS=Blastochloris sulfoviridis OX=50712 GN=aspS PE=3 SV=1
2418	1801	tr|A0A4R3N492|A0A4R3N492_9GAMM	49.05	15	5	5	40200000	39900000	39400000	41100000	48900000	53100000	48600000	46200000	9930000	9380000	8240000	7860000	0.82:0.82:0.80:0.84:1.00:1.09:0.99:0.94:0.20:0.19:0.17:0.16	40100000	49200000	8970000	0.82:1.00:0.18	46715	Chromatiaceae	Thiobaca	Glucose-1-phosphate adenylyltransferase OS=Thiobaca trueperi OX=127458 GN=glgC PE=3 SV=1
1124	50727	tr|Q21CX0|Q21CX0_RHOPB	31.71	12	10	3	703000	758000	180000	685000	233000	359000	856000	733000	9890000	9170000	8280000	7560000	3.02:3.26:0.78:2.94:1.00:1.54:3.68:3.15:42.54:39.43:35.60:32.52	803000	749000	8730000	1.07:1.00:11.65	111528	Bradyrhizobiaceae	Rhodopseudomonas	Alpha-ketoglutarate dehydrogenase OS=Rhodopseudomonas palustris (strain BisB18) OX=316056 GN=RPC_0191 PE=4 SV=1
2808	52125	tr|A0A380WAA6|A0A380WAA6_AFIFE	26.8	10	5	5	372000	326000	82700	641000	282000	2300000	266000	515000	9860000	3380000	11000000	10600000	1.32:1.16:0.29:2.27:1.00:8.15:0.94:1.83:34.98:11.98:39.00:37.62	567000	2160000	8710000	0.26:1.00:4.04	50167	Bradyrhizobiaceae	Afipia	Nitrogen regulation protein NR(I) OS=Afipia felis OX=1035 GN=glnG_3 PE=4 SV=1
1133	3478	tr|A0A0U5IE59|A0A0U5IE59_9GAMM	19.88	31	6	3	20800000	21000000	27000000	27300000	14600000	16300000	20900000	20600000	9850000	16200000	12200000	13400000	1.43:1.44:1.85:1.87:1.00:1.12:1.43:1.41:0.68:1.11:0.84:0.92	24500000	18700000	12900000	1.31:1.00:0.69	27455	Chromatiaceae	Thiocapsa	Enoyl-[acyl-carrier-protein] reductase [NADH] OS=Thiocapsa sp. KS1 OX=610332 GN=fabI PE=3 SV=1
4614	29618	tr|A0A5M6HK22|A0A5M6HK22_9RHIZ	40.85	5	3	3	4440000	3820000	3790000	3900000	3680000	3910000	3410000	4490000	9850000	9990000	8140000	8200000	1.21:1.04:1.03:1.06:1.00:1.06:0.93:1.22:2.68:2.72:2.21:2.23	3990000	3870000	9040000	1.03:1.00:2.34	47381	Blastochloridaceae	Blastochloris	Sulfite dehydrogenase OS=Blastochloris sulfoviridis OX=50712 GN=soxC PE=4 SV=1
4657	56126	tr|A0A2D8SV42|A0A2D8SV42_9PLAN	21.38	3	2	2	5270000	3970000	5140000	5320000	5830000	5740000	9590000	10700000	9840000	6870000	9380000	9910000	0.90:0.68:0.88:0.91:1.00:0.98:1.64:1.83:1.69:1.18:1.61:1.70	4920000	10100000	9000000	0.49:1.00:0.89	72581	Planctomycetaceae	0	1 4-alpha-glucan branching enzyme GlgB OS=Planctomycetaceae bacterium OX=2026779 GN=glgB PE=3 SV=1
4739	28136	tr|A0A318TE01|A0A318TE01_9BRAD	48.26	11	2	2	2630000	2610000	3320000	2910000	2980000	3920000	2230000	2470000	9830000	11300000	10700000	9110000	0.88:0.87:1.11:0.98:1.00:1.31:0.75:0.83:3.29:3.77:3.59:3.05	2940000	2990000	10700000	0.98:1.00:3.58	26723	Bradyrhizobiaceae	Rhodopseudomonas	BON domain-containing protein OS=Rhodopseudomonas faecalis OX=99655 GN=BJ122_11557 PE=4 SV=1
4085	25648	tr|A0A5M6I2F9|A0A5M6I2F9_9RHIZ	20.43	16	4	4	4960000	6270000	3720000	3660000	3640000	6320000	6200000	4010000	9780000	7370000	8610000	9560000	1.36:1.72:1.02:1.00:1.00:1.73:1.70:1.10:2.68:2.02:2.36:2.62	4650000	5120000	9210000	0.91:1.00:1.80	36779	Blastochloridaceae	Blastochloris	D-glycerate dehydrogenase OS=Blastochloris sulfoviridis OX=50712 GN=F1193_05460 PE=3 SV=1
2901	23221	tr|A0A336JQZ2|A0A336JQZ2_9BRAD	4.61	22	5	5	16500000	2840000	1900000	1280000	2900000	3950000	15700000	6030000	9770000	16400000	13700000	3650000	5.67:0.98:0.65:0.44:1.00:1.36:5.40:2.08:3.36:5.66:4.70:1.26	6780000	12000000	12900000	0.56:1.00:1.08	28719	Bradyrhizobiaceae	Rhodopseudomonas	Enoyl-[acyl-carrier-protein] reductase [NADH] OS=Rhodopseudomonas pentothenatexigens OX=999699 GN=SAMN05892882_115112 PE=3 SV=1
3257	27821	tr|A0A0H5BDQ4|A0A0H5BDQ4_BLAVI	9.13	41	4	4	9420000	4710000	4960000	4270000	7340000	7800000	10100000	16000000	9680000	9820000	9670000	8110000	1.28:0.64:0.68:0.58:1.00:1.06:1.37:2.18:1.32:1.34:1.32:1.10	5900000	10300000	9320000	0.57:1.00:0.90	13489	Blastochloridaceae	Blastochloris	Chemotaxis protein CheY OS=Blastochloris viridis OX=1079 GN=cheY_1 PE=4 SV=1
595	1399	tr|A0A4R3MUJ3|A0A4R3MUJ3_9GAMM	35.42	27	11	6	38400000	37500000	32100000	35200000	32000000	31900000	42200000	28900000	9620000	13300000	12700000	9080000	1.20:1.17:1.00:1.10:1.00:1.00:1.32:0.90:0.30:0.41:0.40:0.28	38000000	37100000	11400000	1.02:1.00:0.31	59260	Chromatiaceae	Thiobaca	Phosphoglucomutase OS=Thiobaca trueperi OX=127458 GN=EDC35_107123 PE=3 SV=1
4169	27629	tr|A0A4R3N723|A0A4R3N723_9GAMM	30.81	11	3	3	41200000	45300000	44500000	41900000	41400000	42600000	32700000	36500000	9620000	9650000	15000000	14300000	1.00:1.09:1.07:1.01:1.00:1.03:0.79:0.88:0.23:0.23:0.36:0.35	43600000	38600000	12200000	1.13:1.00:0.31	24790	Chromatiaceae	Thiobaca	Outer-membrane lipoprotein carrier protein OS=Thiobaca trueperi OX=127458 GN=lolA PE=3 SV=1
3940	55309	tr|A0A318STF1|A0A318STF1_9RHOB	36.32	14	4	2	388000	772000	1450000	1340000	2010000	1240000	1300000	1060000	9580000	8220000	8110000	7500000	0.19:0.38:0.72:0.67:1.00:0.62:0.65:0.53:4.77:4.09:4.04:3.73	1040000	1470000	8350000	0.71:1.00:5.68	33636	Rhodobacteraceae	Pseudoroseicyclus	Malate dehydrogenase OS=Pseudoroseicyclus aestuarii OX=1795041 GN=mdh PE=3 SV=1
4165	27086	tr|A0A4R3N0K3|A0A4R3N0K3_9GAMM	3.76	17	4	4	5740000	5090000	16000000	15600000	10700000	9650000	15600000	15400000	9550000	7190000	7890000	19800	0.54:0.48:1.49:1.46:1.00:0.90:1.46:1.44:0.89:0.67:0.74:0.02	14100000	12800000	8320000	1.10:1.00:0.65	29750	Chromatiaceae	Thiobaca	Phospholipid-binding lipoprotein MlaA OS=Thiobaca trueperi OX=127458 GN=EDC35_103323 PE=3 SV=1
2742	23946	tr|A0A318TA44|A0A318TA44_9BRAD	25.12	12	4	3	70900	66200	0	57600	229000	37900	0	0	9540000	8840000	7250000	4430000	0.31:0.29:0:0.25:1.00:0.17:0:0:41.69:38.62:31.66:19.33	64900	133000	8230000	0.49:1.00:61.67	55035	Bradyrhizobiaceae	Rhodopseudomonas	Putative thymidine phosphorylase OS=Rhodopseudomonas faecalis OX=99655 GN=BJ122_11521 PE=3 SV=1
3804	25502	tr|A0A0H5BPP1|A0A0H5BPP1_BLAVI	23.88	17	4	2	702000	447000	0	1690000	2240000	3300000	5210000	4290000	9490000	12000000	13800000	14400000	0.31:0.20:0:0.76:1.00:1.47:2.33:1.92:4.24:5.34:6.17:6.43	948000	3780000	12400000	0.25:1.00:3.28	38321	Blastochloridaceae	Blastochloris	Beta-methylmalyl-CoA dehydratase OS=Blastochloris viridis OX=1079 GN=BV133_2035 PE=4 SV=1
4030	57217	tr|A0A512HGF4|A0A512HGF4_9RHIZ	3.98	8	3	2	0	0	0	0	7630000	4160000	0	0	9490000	9080000	7790000	7780000	0:0:0:0:1.00:0.54:0:0:1.24:1.19:1.02:1.02	0	5900000	8830000	0:1.00:1.50	43934	Rhizobiaceae	Rhizobium	3-oxoacyl-[acyl-carrier-protein] synthase 2 OS=Rhizobium naphthalenivorans OX=1118451 GN=fabF_1 PE=3 SV=1
2912	24134	tr|A0A4Z9|A0A4Z9_RHOPA	53.85	25	4	3	8990000	10400000	3070000	3160000	294000	257000	285000	190000	9380000	10300000	10400000	11300000	30.56:35.30:10.43:10.74:1.00:0.87:0.97:0.65:31.89:35.10:35.52:38.45	8890000	257000	10400000	34.64:1.00:40.40	27242	Bradyrhizobiaceae	Rhodopseudomonas	H subunit of photosynthetic reaction center complex OS=Rhodopseudomonas palustris (strain ATCC BAA-98 / CGA009) OX=258594 GN=puhA PE=1 SV=1
3669	28150	tr|A0A348G331|A0A348G331_9RHIZ	7.66	21	3	3	1490000	1490000	11900000	550000	4190000	6370000	17700000	15400000	9380000	12600000	9710000	8940000	0.35:0.36:2.84:0.13:1.00:1.52:4.22:3.67:2.24:3.00:2.32:2.13	3910000	11500000	10200000	0.34:1.00:0.89	15393	Blastochloridaceae	Blastochloris	30S ribosomal protein S6 OS=Blastochloris tepida OX=2233851 GN=rpsF PE=3 SV=1
4284	28934	tr|A0A7W8DXJ0|A0A7W8DXJ0_9BRAD	11.03	9	3	2	412000	218000	2160000	515000	954000	753000	1970000	807000	9370000	1080000	4650000	5450000	0.43:0.23:2.26:0.54:1.00:0.79:2.06:0.85:9.83:1.13:4.88:5.72	825000	1330000	9000000	0.62:1.00:6.76	53619	Bradyrhizobiaceae	Rhodopseudomonas	Tryptophanase OS=Rhodopseudomonas rhenobacensis OX=87461 GN=HNR60_000535 PE=4 SV=1
3180	24507	tr|A0A318T820|A0A318T820_9BRAD	13.38	8	4	3	14400000	18800000	14800000	14700000	12100000	11100000	14800000	12600000	9360000	13200000	12100000	11200000	1.19:1.55:1.22:1.21:1.00:0.92:1.22:1.04:0.77:1.09:1.00:0.92	15700000	13400000	11400000	1.17:1.00:0.85	70688	Bradyrhizobiaceae	Rhodopseudomonas	Phosphomethylpyrimidine synthase OS=Rhodopseudomonas faecalis OX=99655 GN=thiC PE=3 SV=1
4492	26254	tr|A0A318TBG0|A0A318TBG0_9BRAD	46.98	6	2	2	3150000	2900000	2820000	115000	468000	406000	262000	353000	9330000	9400000	7530000	7960000	6.73:6.19:6.01:0.24:1.00:0.87:0.56:0.75:19.93:20.06:16.08:17.00	2250000	373000	9800000	6.03:1.00:26.31	45499	Bradyrhizobiaceae	Rhodopseudomonas	Sulfide dehydrogenase (Flavocytochrome c) flavoprotein subunit /cytochrome-dependent sulfide dehydrogenase (Flavoprotein) OS=Rhodopseudomonas faecalis OX=99655 GN=BJ122_11655 PE=4 SV=1
191	308	tr|A0A4V2V0X6|A0A4V2V0X6_9GAMM	62.99	57	15	11	212000000	213000000	158000000	178000000	159000000	146000000	214000000	239000000	9300000	10800000	7430000	8890000	1.33:1.33:0.99:1.12:1.00:0.92:1.35:1.50:0.06:0.07:0.05:0.06	190000000	190000000	9390000	1.00:1.00:0.05	42778	Chromatiaceae	Thiobaca	Citrate synthase OS=Thiobaca trueperi OX=127458 GN=EDC35_11019 PE=3 SV=1
5372	29194	tr|A0A4R3MXG4|A0A4R3MXG4_9GAMM	25.95	12	2	2	17100000	17900000	18400000	15600000	13600000	13400000	12600000	13800000	9280000	9940000	11000000	7070000	1.25:1.31:1.35:1.14:1.00:0.98:0.93:1.01:0.68:0.73:0.81:0.52	17200000	13400000	9410000	1.29:1.00:0.70	23545	Chromatiaceae	Thiobaca	ATP phosphoribosyltransferase OS=Thiobaca trueperi OX=127458 GN=hisG PE=3 SV=1
397	22900	tr|Q138Z1|Q138Z1_RHOPS	40.41	25	10	2	1310000	1160000	341000	795000	221000	543000	395000	403000	9270000	10800000	10600000	11700000	5.94:5.23:1.54:3.59:1.00:2.45:1.78:1.82:41.90:48.85:47.90:53.06	902000	390000	10600000	2.31:1.00:27.16	36483	Bradyrhizobiaceae	Rhodopseudomonas	TRAP dicarboxylate transporter DctP subunit OS=Rhodopseudomonas palustris (strain BisB5) OX=316057 GN=RPD_2113 PE=3 SV=1
4099	27201	tr|A0A348G117|A0A348G117_9RHIZ	50.02	10	3	3	574000	934000	615000	560000	7210000	6380000	6440000	6260000	9270000	9600000	11400000	9970000	0.08:0.13:0.09:0.08:1.00:0.89:0.89:0.87:1.29:1.33:1.58:1.38	1020000	6860000	10400000	0.15:1.00:1.52	45908	Blastochloridaceae	Blastochloris	Tyrosine--tRNA ligase OS=Blastochloris tepida OX=2233851 GN=tyrS PE=3 SV=1
4597	27288	tr|A0A318TD85|A0A318TD85_9BRAD	13.24	15	3	3	5660000	6040000	2810000	4590000	5490000	4840000	2640000	2700000	9240000	8050000	6370000	6030000	1.03:1.10:0.51:0.84:1.00:0.88:0.48:0.49:1.68:1.47:1.16:1.10	4830000	4480000	9270000	1.08:1.00:2.07	28816	Bradyrhizobiaceae	Rhodopseudomonas	Inositol-1-monophosphatase OS=Rhodopseudomonas faecalis OX=99655 GN=BJ122_10963 PE=3 SV=1
4714	26278	tr|A0A5M6HTQ1|A0A5M6HTQ1_9RHIZ	37.13	22	3	2	7010000	6730000	7880000	8120000	14200000	13400000	14700000	13000000	9230000	11300000	12300000	9650000	0.49:0.47:0.55:0.57:1.00:0.94:1.03:0.91:0.65:0.80:0.87:0.68	7440000	13800000	11800000	0.54:1.00:0.86	22795	Blastochloridaceae	Blastochloris	NYN domain-containing protein OS=Blastochloris sulfoviridis OX=50712 GN=F1193_12730 PE=4 SV=1
642	50569	tr|A0A7G3CVH1|A0A7G3CVH1_9RHOB	39.51	41	11	2	2240000	2330000	2990000	2850000	2220000	2220000	1110000	1060000	9210000	7670000	10400000	7600000	1.01:1.05:1.35:1.28:1.00:1.00:0.50:0.48:4.15:3.46:4.68:3.42	2610000	1650000	8720000	1.58:1.00:5.28	50668	Rhodobacteraceae	Carideicomes	ATP synthase subunit beta OS=Carideicomes alvinocaridis OX=2541728 GN=atpD PE=3 SV=1
80	391	tr|A0A447CV55|A0A447CV55_9RHIZ	0	56	21	2	1080000	141000	0	0	52000	0	0	0	9200000	7780000	5020000	7130000	20.84:2.72:0:0:1.00:0:0:0:64.00:64.00:64.00:64.00	613000	52000	8070000	11.78:1.00:64.00	43557	Hyphomicrobiaceae	Rhodoplanes	Elongation factor Tu OS=Rhodoplanes piscinae OX=444923 GN=tuf1 PE=3 SV=1
4834	8790	tr|A0A4R3MZT8|A0A4R3MZT8_9GAMM	31.45	15	2	2	132000000	142000000	148000000	136000000	115000000	130000000	153000000	130000000	9190000	3640000	2430000	7540000	1.15:1.24:1.29:1.19:1.00:1.13:1.33:1.14:0.08:0.03:0.02:0.07	140000000	132000000	5700000	1.06:1.00:0.04	17704	Chromatiaceae	Thiobaca	Protein-export protein SecB OS=Thiobaca trueperi OX=127458 GN=secB PE=3 SV=1
53	94	tr|A0A2K8U353|A0A2K8U353_9GAMM	47.13	31	21	2	123000000	128000000	84200000	116000000	83500000	84100000	91400000	101000000	9150000	11800000	7850000	6990000	1.47:1.53:1.01:1.39:1.00:1.01:1.09:1.21:0.11:0.14:0.09:0.08	113000000	90100000	8940000	1.25:1.00:0.10	57474	Chromatiaceae	Thiodictyon	60 kDa chaperonin OS=Candidatus Thiodictyon syntrophicum OX=1166950 GN=groL PE=3 SV=1
851	5679	tr|A0A4R3MU71|A0A4R3MU71_9GAMM	11.04	15	10	10	9670000	9820000	6950000	6950000	10700000	14000000	11600000	10800000	9130000	13300000	11200000	6080000	0.91:0.92:0.65:0.65:1.00:1.31:1.09:1.01:0.86:1.24:1.05:0.57	8350000	11800000	13100000	0.71:1.00:1.12	89369	Chromatiaceae	Thiobaca	DNA gyrase subunit B OS=Thiobaca trueperi OX=127458 GN=gyrB PE=3 SV=1
2805	51665	tr|A0A318TKR4|A0A318TKR4_9BRAD	18.62	29	4	4	2430000	1350000	3210000	4640000	749000	302000	4380000	2800000	9050000	11700000	8190000	8560000	3.25:1.81:4.29:6.20:1.00:0.40:5.85:3.74:12.09:15.60:10.94:11.43	2910000	2080000	9420000	1.40:1.00:4.52	25106	Bradyrhizobiaceae	Rhodopseudomonas	Uridylate kinase OS=Rhodopseudomonas faecalis OX=99655 GN=pyrH PE=3 SV=1
4077	25341	tr|A0A318TFP9|A0A318TFP9_9BRAD	12.17	11	4	4	8870000	10100000	12900000	8510000	17400000	19100000	10800000	15700000	9010000	11900000	9840000	8540000	0.51:0.58:0.74:0.49:1.00:1.09:0.62:0.90:0.52:0.68:0.56:0.49	10100000	16000000	9870000	0.64:1.00:0.62	57735	Bradyrhizobiaceae	Rhodopseudomonas	Exo-beta-1 3-glucanase (GH17 family) OS=Rhodopseudomonas faecalis OX=99655 GN=BJ122_10518 PE=4 SV=1
2334	5489	tr|A0A4R3MYC3|A0A4R3MYC3_9GAMM	18.95	12	6	4	17500000	12500000	16300000	6680000	26200000	19400000	16200000	13200000	8940000	7480000	4140000	6190000	0.67:0.48:0.62:0.25:1.00:0.74:0.62:0.50:0.34:0.29:0.16:0.24	13900000	19000000	6940000	0.73:1.00:0.37	77682	Chromatiaceae	Thiobaca	Membrane glycosyltransferase OS=Thiobaca trueperi OX=127458 GN=EDC35_104230 PE=4 SV=1
4852	28371	tr|A0A182D4J2|A0A182D4J2_BLAVI	0	13	2	2	151000	0	0	0	1180000	1480000	519000	764000	8900000	10600000	15600000	9250000	0.13:0:0:0:1.00:1.25:0.44:0.65:7.52:8.96:13.15:7.81	151000	987000	12200000	0.15:1.00:12.41	21075	Blastochloridaceae	Blastochloris	Ribosome-recycling factor OS=Blastochloris viridis OX=1079 GN=frr PE=3 SV=1
5567	56881	tr|A0A1H7KYS8|A0A1H7KYS8_9PSED	37.82	5	2	2	26500000	32100000	23200000	20200000	26100000	25100000	19500000	28000000	8850000	9240000	6440000	7090000	1.01:1.23:0.89:0.77:1.00:0.96:0.75:1.07:0.34:0.35:0.25:0.27	26800000	24900000	10500000	1.08:1.00:0.42	53874	Pseudomonadaceae	Pseudomonas	Glycerol kinase OS=Pseudomonas hussainii OX=1429083 GN=glpK PE=3 SV=1
28	20518	tr|A0A4R3NAC4|A0A4R3NAC4_9GAMM	48.42	24	30	13	18000000	17400000	18900000	17700000	58600000	56300000	49000000	51800000	8830000	7110000	6850000	18600000	0.31:0.30:0.32:0.30:1.00:0.96:0.84:0.88:0.15:0.12:0.12:0.32	18000000	53900000	11400000	0.33:1.00:0.21	180447	Chromatiaceae	Thiobaca	Pyruvate-ferredoxin/flavodoxin oxidoreductase OS=Thiobaca trueperi OX=127458 GN=EDC35_101274 PE=3 SV=1
826	919	tr|A0A4R3N7L9|A0A4R3N7L9_9GAMM	48.11	24	9	9	35000000	33100000	34700000	28700000	33500000	29800000	37700000	36400000	8810000	7620000	6100000	6490000	1.05:0.99:1.04:0.86:1.00:0.89:1.13:1.09:0.26:0.23:0.18:0.19	32900000	34400000	7420000	0.96:1.00:0.22	49475	Chromatiaceae	Thiobaca	ATP-sulfurylase large subunit OS=Thiobaca trueperi OX=127458 GN=EDC35_101456 PE=4 SV=1
1525	2928	tr|A0A4R3MS99|A0A4R3MS99_9GAMM	4.89	10	8	2	7200000	3790000	5430000	3420000	6710000	5340000	7120000	6950000	8780000	7040000	3670000	3920000	1.07:0.56:0.81:0.51:1.00:0.80:1.06:1.04:1.31:1.05:0.55:0.58	5530000	6530000	5940000	0.85:1.00:0.91	89051	Chromatiaceae	Thiobaca	Ribonuclease R OS=Thiobaca trueperi OX=127458 GN=rnr PE=3 SV=1
5490	6543	tr|A0A4R3N4P8|A0A4R3N4P8_9GAMM	70.59	25	2	2	68700000	68500000	74600000	70200000	53200000	57100000	74600000	72500000	8770000	8690000	9820000	9580000	1.29:1.29:1.40:1.32:1.00:1.07:1.40:1.36:0.16:0.16:0.18:0.18	70500000	64300000	9230000	1.10:1.00:0.14	11440	Chromatiaceae	Thiobaca	Pyrimidine/purine nucleoside phosphorylase OS=Thiobaca trueperi OX=127458 GN=ppnP PE=3 SV=1
523	536	tr|A0A4R3N6Z8|A0A4R3N6Z8_9GAMM	58.32	37	13	12	42500000	47400000	38700000	41800000	40700000	36000000	45100000	45300000	8760000	9000000	9070000	8580000	1.05:1.17:0.95:1.03:1.00:0.89:1.11:1.12:0.22:0.22:0.22:0.21	42600000	41800000	8850000	1.02:1.00:0.21	53253	Chromatiaceae	Thiobaca	Glutamate--tRNA ligase OS=Thiobaca trueperi OX=127458 GN=gltX PE=3 SV=1
4896	54233	Q07UH1|TRPB_RHOP5	28.89	12	3	2	840000	1770000	677000	299000	0	198000	447000	503000	8750000	10700000	6590000	4960000	64.00:64.00:64.00:64.00:-:64.00:64.00:64.00:64.00:64.00:64.00:64.00	977000	574000	7750000	1.70:1.00:13.49	43641	Bradyrhizobiaceae	Rhodopseudomonas	Tryptophan synthase beta chain OS=Rhodopseudomonas palustris (strain BisA53) OX=316055 GN=trpB PE=3 SV=1
1981	1588	tr|D3RNZ0|D3RNZ0_ALLVD	35.7	22	6	5	31300000	31700000	26900000	31600000	31000000	25900000	34200000	30000000	8730000	12600000	10100000	8040000	1.01:1.02:0.87:1.02:1.00:0.84:1.10:0.97:0.28:0.41:0.33:0.26	30400000	30300000	10200000	1.00:1.00:0.34	42184	Chromatiaceae	Allochromatium	Serine--pyruvate transaminase OS=Allochromatium vinosum (strain ATCC 17899 / DSM 180 / NBRC 103801 / NCIMB 10441 / D) OX=572477 GN=Alvin_0550 PE=3 SV=1
1952	21948	tr|A0A348G1M7|A0A348G1M7_9RHIZ	9.99	28	5	5	7550000	7630000	7880000	907000	22600000	16900000	20500000	30500000	8720000	3200000	70900000	4730000	0.33:0.34:0.35:0.04:1.00:0.75:0.90:1.35:0.39:0.14:3.14:0.21	6250000	29900000	28000000	0.21:1.00:0.93	29798	Blastochloridaceae	Blastochloris	Lipoprotein OS=Blastochloris tepida OX=2233851 GN=BLTE_21450 PE=3 SV=1
5389	31186	tr|A0A0D7F3S7|A0A0D7F3S7_RHOPL	25.45	9	2	2	13600000	13400000	10700000	15600000	3010000	4570000	4940000	6130000	8720000	10700000	7620000	8370000	4.50:4.45:3.55:5.19:1.00:1.52:1.64:2.04:2.89:3.55:2.53:2.78	13900000	5120000	9740000	2.71:1.00:1.90	29694	Bradyrhizobiaceae	Rhodopseudomonas	2 5-diketo-D-gluconic acid reductase OS=Rhodopseudomonas palustris OX=1076 GN=dkgB PE=4 SV=1
190	88	tr|A0A4R3N4H3|A0A4R3N4H3_9GAMM	35.72	63	20	13	58900000	73000000	36100000	61400000	31300000	22900000	75200000	72800000	8700000	8280000	6380000	8090000	1.88:2.33:1.15:1.96:1.00:0.73:2.40:2.32:0.28:0.26:0.20:0.26	64400000	50500000	8530000	1.27:1.00:0.17	54674	Chromatiaceae	Thiobaca	Glyco_hydro_57 domain-containing protein OS=Thiobaca trueperi OX=127458 GN=EDC35_101390 PE=4 SV=1
2201	22590	tr|A0A318TBX1|A0A318TBX1_9BRAD	18.65	8	5	5	16500000	15800000	14000000	12800000	12800000	16200000	18900000	15500000	8680000	12100000	8200000	7900000	1.29:1.24:1.10:1.00:1.00:1.27:1.48:1.21:0.68:0.95:0.64:0.62	14900000	16000000	9210000	0.93:1.00:0.58	96520	Bradyrhizobiaceae	Rhodopseudomonas	Acetyltransferase OS=Rhodopseudomonas faecalis OX=99655 GN=BJ122_11563 PE=4 SV=1
3900	27601	tr|A0A318T9P5|A0A318T9P5_9BRAD	16.12	13	4	4	11200000	7860000	8430000	9200000	3820000	6030000	5070000	3220000	8680000	9030000	8550000	8340000	2.93:2.06:2.21:2.41:1.00:1.58:1.33:0.84:2.27:2.36:2.24:2.18	9240000	6120000	8650000	1.51:1.00:1.41	50546	Bradyrhizobiaceae	Rhodopseudomonas	D-lactate dehydrogenase (Cytochrome) OS=Rhodopseudomonas faecalis OX=99655 GN=BJ122_12320 PE=4 SV=1
4158	25684	tr|A0A5M6I2B4|A0A5M6I2B4_9RHIZ	11.94	16	4	4	888000	3740000	4840000	3300000	10100000	7330000	11500000	9260000	8660000	8740000	8590000	4810000	0.09:0.37:0.48:0.33:1.00:0.73:1.14:0.92:0.86:0.87:0.85:0.48	3190000	9940000	7750000	0.32:1.00:0.78	33456	Blastochloridaceae	Blastochloris	Sugar kinase OS=Blastochloris sulfoviridis OX=50712 GN=F1193_05450 PE=4 SV=1
2712	51312	tr|A0A318TNG0|A0A318TNG0_9BRAD	11.38	4	5	2	12700000	13400000	7780000	10900000	5580000	5100000	10400000	10300000	8650000	6400000	7060000	5570000	2.28:2.40:1.39:1.96:1.00:0.91:1.86:1.85:1.55:1.15:1.26:1.00	11400000	7850000	6920000	1.45:1.00:0.88	138323	Bradyrhizobiaceae	Rhodopseudomonas	Vitamin B12-dependent ribonucleotide reductase OS=Rhodopseudomonas faecalis OX=99655 GN=BJ122_101167 PE=3 SV=1
5540	36438	tr|A0A5M6HJZ7|A0A5M6HJZ7_9RHIZ	13.06	21	2	2	340000	0	113000	0	740000	695000	7770000	7680000	8580000	8600000	8980000	8630000	0.46:0:0.15:0:1.00:0.94:10.51:10.39:11.60:11.63:12.15:11.66	453000	8440000	8700000	0.05:1.00:1.03	12213	Blastochloridaceae	Blastochloris	RidA family protein OS=Blastochloris sulfoviridis OX=50712 GN=F1193_16125 PE=3 SV=1
4738	28068	tr|A0A4R3N9V3|A0A4R3N9V3_9GAMM	55.02	12	3	3	19500000	20000000	22200000	20100000	18200000	21500000	18700000	18900000	8570000	9030000	8240000	9490000	1.07:1.10:1.22:1.10:1.00:1.18:1.03:1.04:0.47:0.50:0.45:0.52	20500000	19300000	8830000	1.06:1.00:0.46	36025	Chromatiaceae	Thiobaca	Cytoskeleton protein RodZ OS=Thiobaca trueperi OX=127458 GN=EDC35_101237 PE=4 SV=1
1328	21393	tr|A0A5M6I127|A0A5M6I127_9RHIZ	27.78	19	7	3	1980000	1940000	610000	564000	3120000	2620000	4130000	3840000	8560000	9960000	8790000	6150000	0.63:0.62:0.20:0.18:1.00:0.84:1.32:1.23:2.74:3.19:2.82:1.97	1350000	3580000	8370000	0.38:1.00:2.34	78259	Blastochloridaceae	Blastochloris	Methylmalonyl-CoA mutase OS=Blastochloris sulfoviridis OX=50712 GN=scpA PE=4 SV=1
1649	23164	tr|A0A4R3N4F5|A0A4R3N4F5_9GAMM	12.89	12	9	4	2110000	2450000	4000000	2850000	4220000	4050000	5260000	6380000	8540000	2380000	5560000	9010000	0.50:0.58:0.95:0.68:1.00:0.96:1.24:1.51:2.02:0.56:1.32:2.13	3650000	5200000	6420000	0.70:1.00:1.23	91431	Chromatiaceae	Thiobaca	Lon protease OS=Thiobaca trueperi OX=127458 GN=lon PE=2 SV=1
1955	22430	tr|A0A5M6I5P4|A0A5M6I5P4_9RHIZ	37.12	12	6	3	533000	8620000	622000	546000	1760000	1680000	1060000	1360000	8530000	9370000	8150000	6950000	0.30:4.90:0.35:0.31:1.00:0.95:0.60:0.77:4.85:5.33:4.63:3.95	2580000	1500000	8250000	1.72:1.00:5.51	57738	Blastochloridaceae	Blastochloris	2-isopropylmalate synthase OS=Blastochloris sulfoviridis OX=50712 GN=leuA PE=3 SV=1
2304	23669	tr|A0A4R3N1Y6|A0A4R3N1Y6_9GAMM	12.19	5	5	4	5620000	6440000	3290000	4830000	8860000	9330000	7980000	7330000	8500000	5580000	13900000	9540000	0.63:0.73:0.37:0.55:1.00:1.05:0.90:0.83:0.96:0.63:1.56:1.08	5050000	8370000	10200000	0.60:1.00:1.22	151893	Chromatiaceae	Thiobaca	SNF2 family DNA or RNA helicase OS=Thiobaca trueperi OX=127458 GN=EDC35_103220 PE=4 SV=1
4596	27165	tr|A0A4R3MX09|A0A4R3MX09_9GAMM	34.57	11	3	2	3840000	2960000	2750000	2570000	5950000	7020000	5170000	4650000	8450000	7950000	11500000	10200000	0.65:0.50:0.46:0.43:1.00:1.18:0.87:0.78:1.42:1.34:1.93:1.71	3030000	5700000	9510000	0.53:1.00:1.67	36759	Chromatiaceae	Thiobaca	Phosphate acyltransferase OS=Thiobaca trueperi OX=127458 GN=plsX PE=3 SV=1
433	467	tr|Q07IT8|Q07IT8_RHOP5	0	36	11	2	1550000	0	0	0	0	27400	0	0	8390000	8180000	10700000	7040000	64.00:-:-:-:-:64.00:-:-:64.00:64.00:64.00:64.00	1550000	27400	8570000	56.70:1.00:64.00	45048	Bradyrhizobiaceae	Rhodopseudomonas	ABC transporter periplasmic branched chain amino acid binding protein OS=Rhodopseudomonas palustris (strain BisA53) OX=316055 GN=RPE_4221 PE=4 SV=1
387	1422	tr|A0A4R3MYK7|A0A4R3MYK7_9GAMM	20.68	43	15	9	54900000	58100000	48800000	50600000	62200000	59700000	77900000	76800000	8370000	1750000	445000	5590000	0.88:0.93:0.78:0.81:1.00:0.96:1.25:1.23:0.13:0.03:0.02:0.09	53100000	69100000	4060000	0.77:1.00:0.06	51469	Chromatiaceae	Thiobaca	Adenosylhomocysteinase OS=Thiobaca trueperi OX=127458 GN=ahcY PE=3 SV=1
255	665	tr|I3Y9S5|I3Y9S5_THIV6	28.28	15	16	2	26500000	25900000	25700000	24500000	35700000	36700000	33100000	31300000	8340000	8350000	8760000	17700000	0.74:0.73:0.72:0.69:1.00:1.03:0.93:0.88:0.23:0.23:0.25:0.50	25700000	34200000	10800000	0.75:1.00:0.32	117098	Chromatiaceae	Thiocystis	Carbamoyl-phosphate synthase large chain OS=Thiocystis violascens (strain ATCC 17096 / DSM 198 / 6111) OX=765911 GN=carB PE=3 SV=1
4766	33651	tr|A0A0H5B9Z4|A0A0H5B9Z4_BLAVI	29.19	8	3	3	102000	0	198000	61900	2100000	2510000	714000	228000	8320000	7430000	4150000	4390000	0.05:0:0.09:0.03:1.00:1.20:0.34:0.11:3.97:3.54:1.98:2.09	232000	1390000	6230000	0.17:1.00:4.49	40844	Blastochloridaceae	Blastochloris	Putrescine-binding periplasmic protein OS=Blastochloris viridis OX=1079 GN=potF_1 PE=3 SV=1
4833	8418	tr|A0A4R3MQM3|A0A4R3MQM3_9GAMM	2.24	13	2	2	12800000	12000000	12800000	14000000	9160000	9250000	15600000	17500000	8290000	86000	13000000	11700000	1.39:1.31:1.39:1.53:1.00:1.01:1.70:1.91:0.90:0.02:1.42:1.27	12900000	12900000	8270000	1.00:1.00:0.64	16136	Chromatiaceae	Thiobaca	Rhodanese-related sulfurtransferase OS=Thiobaca trueperi OX=127458 GN=EDC35_11321 PE=4 SV=1
1099	22152	tr|K8NS24|K8NS24_9BRAD	20.91	15	9	3	170000	1600000	277000	979000	46800	221000	877000	988000	8280000	6950000	7230000	8480000	3.63:34.17:5.93:20.91:1.00:4.71:18.74:21.11:64.00:64.00:64.00:64.00	756000	634000	7790000	1.19:1.00:12.29	77648	Bradyrhizobiaceae	Afipia	Polyribonucleotide nucleotidyltransferase OS=Afipia clevelandensis ATCC 49720 OX=883079 GN=pnp PE=3 SV=1
3510	26264	tr|A0A0H5BIH0|A0A0H5BIH0_BLAVI	29.1	21	4	3	3040000	1780000	933000	1060000	12600000	12600000	12200000	12400000	8280000	8520000	9050000	10100000	0.24:0.14:0.07:0.08:1.00:1.00:0.96:0.98:0.66:0.67:0.72:0.80	1760000	12500000	10100000	0.14:1.00:0.81	19033	Blastochloridaceae	Blastochloris	50S ribosomal protein L6 OS=Blastochloris viridis OX=1079 GN=rplF PE=3 SV=1
89	742	tr|A0A1H3C9M3|A0A1H3C9M3_ALLWA	50.5	20	24	3	33200000	35600000	22000000	23600000	33900000	36300000	29400000	35600000	8250000	8590000	6640000	7520000	0.98:1.05:0.65:0.69:1.00:1.07:0.87:1.05:0.24:0.25:0.20:0.22	34300000	33800000	8440000	1.02:1.00:0.25	157169	Chromatiaceae	Allochromatium	DNA-directed RNA polymerase subunit beta OS=Allochromatium warmingii OX=61595 GN=rpoB PE=3 SV=1
3514	27675	tr|A0A0Q6ZII1|A0A0Q6ZII1_9BRAD	37.22	11	3	2	956000	970000	446000	865000	920000	720000	1630000	1240000	8210000	8440000	5050000	5480000	1.04:1.05:0.48:0.94:1.00:0.78:1.77:1.35:8.92:9.17:5.48:5.96	809000	1130000	6790000	0.72:1.00:6.02	32021	Bradyrhizobiaceae	Afipia	Malonyl CoA-acyl carrier protein transacylase OS=Afipia sp. Root123D2 OX=1736436 GN=ASC80_08255 PE=3 SV=1
5354	6804	tr|A0A4R3MQ41|A0A4R3MQ41_9GAMM	26.34	18	2	2	29100000	28100000	17800000	18500000	12700000	13900000	21300000	17400000	8210000	3730000	6250000	5530000	2.28:2.21:1.40:1.45:1.00:1.09:1.68:1.36:0.64:0.29:0.49:0.43	23400000	16300000	7820000	1.43:1.00:0.48	21058	Chromatiaceae	Thiobaca	NAD(P)H dehydrogenase (Quinone) OS=Thiobaca trueperi OX=127458 GN=EDC35_11621 PE=3 SV=1
4841	26144	tr|A0A318TCH8|A0A318TCH8_9BRAD	28.87	12	3	3	2520000	2810000	1790000	1710000	2210000	2390000	110000	3660000	8180000	8020000	6350000	6830000	1.14:1.27:0.81:0.77:1.00:1.08:0.05:1.66:3.70:3.63:2.87:3.09	2650000	2140000	7340000	1.24:1.00:3.43	31115	Bradyrhizobiaceae	Rhodopseudomonas	Glucose-1-phosphate cytidylyltransferase OS=Rhodopseudomonas faecalis OX=99655 GN=BJ122_13021 PE=4 SV=1
5215	4711	tr|A0A4R3N3V9|A0A4R3N3V9_9GAMM	16.47	21	3	2	7990000	10300000	9970000	10600000	11200000	10100000	8150000	12600000	8180000	6400000	6990000	7590000	0.72:0.92:0.89:0.95:1.00:0.91:0.73:1.13:0.73:0.57:0.63:0.68	9730000	10500000	7310000	0.93:1.00:0.70	21325	Chromatiaceae	Thiobaca	Nicotinamidase-related amidase OS=Thiobaca trueperi OX=127458 GN=EDC35_102232 PE=4 SV=1
5428	40245	tr|A0A4R3LZ56|A0A4R3LZ56_9RHIZ	0	34	2	2	1430000	0	0	0	0	0	0	0	8180000	8250000	6340000	6210000	64.00:-:-:-:-:-:-:-:64.00:64.00:64.00:64.00	1430000	0	7240000	64.00:-:64.00	7134	0	0	50S ribosomal protein L32 OS=Aquabacter spiritensis OX=933073 GN=rpmF PE=3 SV=1 50S ribosomal protein L32 OS=Stappia sp. ARW1T OX=2135615 GN=rpmF PE=3 SV=1
5343	67819	tr|A0A2W6VEV6|A0A2W6VEV6_SPHSX	38.06	9	2	2	526000	650000	972000	980000	695000	793000	166000	372000	8170000	9370000	9160000	9160000	0.76:0.94:1.40:1.41:1.00:1.14:0.24:0.53:11.75:13.48:13.18:13.18	782000	506000	8970000	1.54:1.00:17.70	10102	0	0	30S ribosomal protein S15 OS=Sphingomonas sp. OX=28214 GN=rpsO PE=3 SV=1 30S ribosomal protein S15 OS=Streptomyces sp. SID10244 OX=2706018 GN=rpsO PE=3 SV=1 30S ribosomal protein S15 OS=Mesorhizobium sp. M00.F.Ca.ET.170.01.1.1 OX=2500524 GN=rpsO PE=3 SV=1
1018	853	tr|A0A4R3MWD3|A0A4R3MWD3_9GAMM	62.89	17	7	7	3630000000	4450000000	3610000000	4860000000	3810000000	3740000000	4120000000	3850000000	8130000	10600000	7890000	6430000	0.95:1.17:0.95:1.28:1.00:0.98:1.08:1.01:0.02:0.02:0.02:0.02	4140000000	3890000000	8590000	1.06:1.00:0.02	28148	Chromatiaceae	Thiobaca	Photosynthetic reaction center H subunit OS=Thiobaca trueperi OX=127458 GN=EDC35_11333 PE=4 SV=1
1617	21774	tr|A0A182D3G4|A0A182D3G4_BLAVI	31.94	31	8	6	423000	460000	176000	833000	12200000	12400000	7800000	7650000	8130000	8960000	7380000	5480000	0.03:0.04:0.02:0.07:1.00:1.01:0.64:0.63:0.66:0.73:0.60:0.45	473000	10000000	8110000	0.05:1.00:0.81	35769	Blastochloridaceae	Blastochloris	UTP--glucose-1-phosphate uridylyltransferase OS=Blastochloris viridis OX=1079 GN=BV133_2130 PE=3 SV=1
3499	9166	tr|A0A318TNU8|A0A318TNU8_9BRAD	22.34	24	4	4	2980000	1450000	235000	276000	37300	118000	136000	747000	8040000	6560000	8260000	0	64.00:38.73:6.28:7.38:1.00:3.15:3.63:20.01:64.00:64.00:64.00:0	2320000	355000	7620000	6.53:1.00:21.46	16652	Bradyrhizobiaceae	Rhodopseudomonas	Uncharacterized protein (DUF1330 family) OS=Rhodopseudomonas faecalis OX=99655 GN=BJ122_12432 PE=4 SV=1
449	249	tr|A0A4R3N105|A0A4R3N105_9GAMM	59.55	47	12	11	75900000	61700000	90300000	95500000	60600000	66300000	74900000	71100000	8020000	8740000	10200000	10000000	1.25:1.02:1.49:1.58:1.00:1.09:1.24:1.17:0.13:0.14:0.17:0.17	80800000	68200000	9750000	1.19:1.00:0.14	36826	Chromatiaceae	Thiobaca	4-hydroxy 2-oxovalerate aldolase OS=Thiobaca trueperi OX=127458 GN=EDC35_105162 PE=4 SV=1
1368	22461	tr|D3RVB4|D3RVB4_ALLVD	10.77	22	8	2	8410000	8780000	9850000	10000000	6910000	6500000	10100000	11600000	7990000	7490000	6640000	5300000	1.22:1.27:1.43:1.45:1.00:0.94:1.46:1.68:1.16:1.09:0.96:0.77	9270000	8780000	8770000	1.06:1.00:1.00	44836	Chromatiaceae	Allochromatium	Aminotransferase class I and II OS=Allochromatium vinosum (strain ATCC 17899 / DSM 180 / NBRC 103801 / NCIMB 10441 / D) OX=572477 GN=Alvin_2124 PE=4 SV=1
2916	24827	tr|A0A318TJ89|A0A318TJ89_9BRAD	22.64	19	4	4	803000	361000	41600	49300	34000	812000	371000	595000	7870000	7100000	11000000	13200000	23.62:10.61:1.22:1.45:1.00:23.88:10.90:17.49:64.00:64.00:64.00:64.00	378000	743000	9790000	0.51:1.00:13.17	37756	Bradyrhizobiaceae	Rhodopseudomonas	L-threonine aldolase OS=Rhodopseudomonas faecalis OX=99655 GN=BJ122_1021 PE=3 SV=1
2422	2624	tr|A0A6M0JZE6|A0A6M0JZE6_9GAMM	57.73	21	5	3	145000000	149000000	120000000	104000000	70000000	62400000	82900000	99100000	7840000	6250000	6000000	8910000	2.07:2.12:1.71:1.48:1.00:0.89:1.18:1.42:0.11:0.09:0.09:0.13	129000000	78600000	7250000	1.65:1.00:0.09	12195	Chromatiaceae	Thiorhodococcus	P-II family nitrogen regulator OS=Thiorhodococcus minor OX=57489 GN=G3446_13515 PE=3 SV=1
4144	3266	tr|A0A4R3MYB0|A0A4R3MYB0_9GAMM	26.14	21	4	4	7720000	6190000	5700000	7470000	5050000	5190000	4150000	4430000	7820000	7440000	6540000	7930000	1.53:1.23:1.13:1.48:1.00:1.03:0.82:0.88:1.55:1.47:1.29:1.57	6770000	4700000	7560000	1.44:1.00:1.61	24299	Chromatiaceae	Thiobaca	Thymidylate kinase OS=Thiobaca trueperi OX=127458 GN=tmk PE=3 SV=1
2882	2279	tr|A0A1H2QNT5|A0A1H2QNT5_THIRO	39.91	16	5	2	37600000	49300000	47800000	43300000	26800000	26000000	28600000	29100000	7810000	6380000	4750000	5120000	1.40:1.84:1.78:1.61:1.00:0.97:1.07:1.08:0.29:0.24:0.18:0.19	44500000	27600000	6010000	1.61:1.00:0.22	29739	Chromatiaceae	Thiocapsa	50S ribosomal protein L2 OS=Thiocapsa roseopersicina OX=1058 GN=rplB PE=3 SV=1
1341	1139	tr|D3RRL9|D3RRL9_ALLVD	68.78	12	7	6	17600000	19100000	16500000	14300000	29100000	26800000	29000000	27000000	7740000	7330000	7370000	7200000	0.61:0.66:0.57:0.49:1.00:0.92:1.00:0.93:0.27:0.25:0.25:0.25	16900000	28000000	7410000	0.60:1.00:0.26	72639	Chromatiaceae	Allochromatium	Threonine--tRNA ligase OS=Allochromatium vinosum (strain ATCC 17899 / DSM 180 / NBRC 103801 / NCIMB 10441 / D) OX=572477 GN=thrS PE=3 SV=1
2775	2755	tr|G2DW13|G2DW13_9GAMM	40.25	20	4	3	208000000	195000000	193000000	195000000	94200000	92500000	72600000	113000000	7720000	4670000	9730000	9920000	2.21:2.07:2.05:2.07:1.00:0.98:0.77:1.20:0.08:0.05:0.10:0.11	198000000	93000000	8060000	2.13:1.00:0.09	34550	Chromatiaceae	Thiorhodococcus	Branched-chain-amino-acid aminotransferase OS=Thiorhodococcus drewsii AZ1 OX=765913 GN=ilvE PE=3 SV=1
5095	8474	tr|A0A4R3N5U1|A0A4R3N5U1_9GAMM	37.43	10	2	2	12200000	20700000	21500000	18300000	15500000	18000000	15300000	18200000	7700000	8090000	7820000	7820000	0.79:1.34:1.39:1.18:1.00:1.16:0.99:1.18:0.50:0.52:0.51:0.51	18200000	16800000	7860000	1.09:1.00:0.47	28253	Chromatiaceae	Thiobaca	PAPS sulfotransferase OS=Thiobaca trueperi OX=127458 GN=EDC35_101454 PE=3 SV=1
4851	28367	tr|A0A318TM02|A0A318TM02_9BRAD	8.77	22	3	3	47000	7170000	5260000	5150000	4630000	5200000	3640000	531000	7670000	16900000	14700000	6370000	0.02:1.55:1.14:1.11:1.00:1.13:0.79:0.11:1.66:3.66:3.17:1.38	4510000	3580000	11400000	1.26:1.00:3.18	16608	Bradyrhizobiaceae	Rhodopseudomonas	CENP-V/GFA domain-containing protein OS=Rhodopseudomonas faecalis OX=99655 GN=BJ122_102123 PE=3 SV=1
136	270	tr|A0A4V2V1S5|A0A4V2V1S5_9GAMM	60.7	51	10	8	572000000	502000000	718000000	660000000	359000000	350000000	435000000	420000000	7630000	12800000	9150000	7920000	1.59:1.40:2.00:1.84:1.00:0.97:1.21:1.17:0.02:0.04:0.03:0.02	613000000	391000000	9750000	1.57:1.00:0.02	26162	Chromatiaceae	Thiobaca	3-oxoacyl-[acyl-carrier-protein] reductase OS=Thiobaca trueperi OX=127458 GN=EDC35_103401 PE=3 SV=1
5547	37967	tr|A0A5M6I004|A0A5M6I004_9RHIZ	32.22	23	2	2	128000	381000	607000	485000	2190000	2130000	3260000	1750000	7630000	6260000	6030000	5240000	0.06:0.17:0.28:0.22:1.00:0.97:1.49:0.80:3.48:2.85:2.75:2.39	432000	2330000	6290000	0.19:1.00:2.70	11283	Blastochloridaceae	Blastochloris	Putative pterin-4-alpha-carbinolamine dehydratase OS=Blastochloris sulfoviridis OX=50712 GN=F1193_09505 PE=3 SV=1
4701	6845	tr|D3RTR2|D3RTR2_ALLVD	28.54	26	3	3	19400000	17400000	25500000	19700000	7830000	8900000	8110000	11200000	7610000	7990000	3030000	2160000	2.48:2.22:3.26:2.52:1.00:1.14:1.04:1.43:0.97:1.02:0.39:0.28	20500000	9190000	5200000	2.23:1.00:0.57	9779	Chromatiaceae	0	Uncharacterized protein OS=Allochromatium vinosum (strain ATCC 17899 / DSM 180 / NBRC 103801 / NCIMB 10441 / D) OX=572477 GN=Alvin_1639 PE=4 SV=1 Uncharacterized protein OS=Thiorhodococcus mannitoliphagus OX=329406 GN=G3480_19815 PE=4 SV=1
1122	50548	tr|A0A318T8V5|A0A318T8V5_9BRAD	28.1	21	7	2	4750000	5090000	5240000	4910000	1230000	1150000	428000	692000	7560000	7920000	6090000	7990000	3.86:4.13:4.26:3.99:1.00:0.94:0.35:0.56:6.15:6.43:4.95:6.50	5090000	903000	7510000	5.64:1.00:8.32	45789	Bradyrhizobiaceae	Rhodopseudomonas	4-hydroxy-3-methylbut-2-en-1-yl diphosphate synthase (flavodoxin) OS=Rhodopseudomonas faecalis OX=99655 GN=ispG PE=3 SV=1
5411	33876	tr|A0A0D7EUC3|A0A0D7EUC3_RHOPL	20.23	9	2	2	309000	481000	0	0	30600	255000	1690000	155000	7560000	7930000	6860000	5840000	10.11:15.74:0:0:1.00:8.33:55.40:5.07:64.00:64.00:64.00:64.00	423000	711000	7050000	0.59:1.00:9.91	29700	Bradyrhizobiaceae	Rhodopseudomonas	3-methyl-2-oxobutanoate hydroxymethyltransferase OS=Rhodopseudomonas palustris OX=1076 GN=panB PE=3 SV=1
4091	26325	tr|A0A318TNV9|A0A318TNV9_9BRAD	30.73	15	4	4	518000	239000	203000	17100	0	33600	70900	100000	7540000	7790000	6090000	4900000	64.00:64.00:64.00:64.00:-:64.00:64.00:64.00:64.00:64.00:64.00:64.00	319000	68300	6670000	4.67:1.00:64.00	43399	Bradyrhizobiaceae	Rhodopseudomonas	Aspartate/methionine/tyrosine aminotransferase OS=Rhodopseudomonas faecalis OX=99655 GN=BJ122_10666 PE=4 SV=1
4307	35500	tr|A0A1B3NP10|A0A1B3NP10_9BRAD	45.54	5	3	3	2030000	2150000	1670000	2110000	899000	1220000	1950000	2240000	7490000	6350000	6720000	6170000	2.26:2.39:1.86:2.34:1.00:1.36:2.17:2.49:8.33:7.06:7.47:6.86	1990000	1580000	6680000	1.26:1.00:4.23	58726	Boseaceae	Bosea	D-3-phosphoglycerate dehydrogenase OS=Bosea sp. RAC05 OX=1842539 GN=serA PE=3 SV=1
3702	23695	tr|A0A348G2Z9|A0A348G2Z9_9RHIZ	26.8	4	4	4	2070000	2010000	568000	1100000	1470000	2830000	2610000	2870000	7450000	6900000	8450000	7670000	1.41:1.36:0.39:0.74:1.00:1.92:1.77:1.95:5.05:4.68:5.73:5.20	1690000	3080000	7620000	0.55:1.00:2.48	110432	Blastochloridaceae	Blastochloris	ACR family transporter OS=Blastochloris tepida OX=2233851 GN=BLTE_26170 PE=4 SV=1
1195	21467	tr|A0A318TI34|A0A318TI34_9BRAD	14.53	18	7	4	160000	51500	1480000	432000	17600000	11700000	846000	450000	7380000	6510000	4920000	6500000	0.02:0.02:0.08:0.02:1.00:0.66:0.05:0.03:0.42:0.37:0.28:0.37	729000	7680000	6700000	0.09:1.00:0.87	59462	Bradyrhizobiaceae	Rhodopseudomonas	Phosphoglucomutase OS=Rhodopseudomonas faecalis OX=99655 GN=BJ122_11075 PE=3 SV=1
4060	7956	tr|A0A4R3N1I0|A0A4R3N1I0_9GAMM	44.5	12	4	4	16900000	15100000	14900000	15200000	7630000	7530000	14000000	14600000	7320000	7010000	6100000	6660000	2.21:1.98:1.95:1.99:1.00:0.99:1.84:1.91:0.96:0.92:0.80:0.87	15500000	10900000	6770000	1.42:1.00:0.62	45252	Chromatiaceae	Thiobaca	Methyl-accepting chemotaxis protein OS=Thiobaca trueperi OX=127458 GN=EDC35_10215 PE=4 SV=1
1404	12326	tr|A0A0H5BDI1|A0A0H5BDI1_BLAVI	37.45	15	7	5	690000	1570000	1410000	706000	17700000	17600000	11300000	17500000	7310000	4510000	7820000	8550000	0.04:0.09:0.08:0.04:1.00:1.00:0.64:0.99:0.41:0.26:0.44:0.48	1090000	16000000	7050000	0.07:1.00:0.44	46449	Blastochloridaceae	Blastochloris	Sulfide dehydrogenase [flavocytochrome c] flavoprotein chain OS=Blastochloris viridis OX=1079 GN=fccB PE=4 SV=1
3802	25194	tr|A0A5M6I1R4|A0A5M6I1R4_9RHIZ	33.07	19	4	3	619000	501000	41000	26200	1450000	1150000	2160000	1350000	7310000	8200000	6600000	5920000	0.43:0.35:0.03:0.02:1.00:0.80:1.50:0.94:5.05:5.67:4.56:4.09	396000	1770000	7010000	0.22:1.00:3.95	40051	Blastochloridaceae	Blastochloris	Acyl-CoA dehydrogenase OS=Blastochloris sulfoviridis OX=50712 GN=F1193_08910 PE=3 SV=1
2346	23583	tr|A0A5M6HYW3|A0A5M6HYW3_9RHIZ	17.89	23	5	4	4790000	5570000	4940000	4140000	8370000	7650000	13200000	12200000	7290000	8480000	2940000	10000000	0.57:0.66:0.59:0.49:1.00:0.91:1.57:1.46:0.87:1.01:0.35:1.20	4860000	10400000	7180000	0.47:1.00:0.69	31795	Blastochloridaceae	Blastochloris	Elongation factor Ts OS=Blastochloris sulfoviridis OX=50712 GN=tsf PE=3 SV=1
691	1425	tr|A0A4R3MV33|A0A4R3MV33_9GAMM	46.89	26	10	10	61100000	61800000	60100000	55000000	52400000	48600000	60200000	57000000	7280000	8610000	7230000	5240000	1.17:1.18:1.15:1.05:1.00:0.93:1.15:1.09:0.14:0.16:0.14:0.10	59500000	54600000	7120000	1.09:1.00:0.13	47888	Chromatiaceae	Thiobaca	Carboxyl-terminal processing protease OS=Thiobaca trueperi OX=127458 GN=EDC35_106111 PE=3 SV=1
2338	22444	tr|A0A318TEW9|A0A318TEW9_9BRAD	19.03	16	6	4	11100000	10300000	10000000	15900000	7700000	7950000	10700000	9870000	7280000	6930000	6490000	6780000	1.44:1.34:1.30:2.07:1.00:1.03:1.40:1.28:0.95:0.90:0.84:0.88	12200000	9100000	6870000	1.34:1.00:0.76	48242	Bradyrhizobiaceae	Rhodopseudomonas	Carbohydrate ABC transporter substrate-binding protein (CUT1 family) OS=Rhodopseudomonas faecalis OX=99655 GN=BJ122_11238 PE=3 SV=1
521	207	tr|A0A4R3MT99|A0A4R3MT99_9GAMM	16.4	22	13	5	81700000	75400000	80900000	70400000	76300000	59500000	73800000	74400000	7240000	6340000	343000	6150000	1.07:0.99:1.06:0.92:1.00:0.78:0.97:0.98:0.09:0.08:0.02:0.08	77100000	75400000	5600000	1.02:1.00:0.07	72049	Chromatiaceae	Thiobaca	Transketolase OS=Thiobaca trueperi OX=127458 GN=EDC35_108131 PE=3 SV=1
1007	7564	tr|A0A0D7F5U1|A0A0D7F5U1_RHOPL	33.03	18	10	2	777000	665000	1240000	953000	1690000	1660000	152000	474000	7130000	8120000	5380000	4180000	0.46:0.39:0.74:0.56:1.00:0.98:0.09:0.28:4.22:4.81:3.19:2.47	1070000	1110000	6200000	0.97:1.00:5.60	72930	Bradyrhizobiaceae	Rhodopseudomonas	Elongation factor G OS=Rhodopseudomonas palustris OX=1076 GN=OO17_00515 PE=3 SV=1
790	50471	tr|A0A318TF30|A0A318TF30_9BRAD	9.23	12	11	2	5320000	7140000	4390000	4710000	1910000	1680000	4510000	3580000	7110000	8220000	4060000	4000000	2.79:3.74:2.30:2.47:1.00:0.88:2.36:1.88:3.72:4.31:2.13:2.09	5390000	2920000	5850000	1.85:1.00:2.00	117029	Bradyrhizobiaceae	Rhodopseudomonas	Ribonuclease E OS=Rhodopseudomonas faecalis OX=99655 GN=rne PE=3 SV=1
795	10585	tr|A0A1M7TZ67|A0A1M7TZ67_9BRAD	6.41	36	11	3	1120000	231000	309000	277000	168000	104000	410000	1620000	7100000	18900000	14400000	158000	6.63:1.37:1.84:1.65:1.00:0.62:2.44:9.63:42.20:64.00:64.00:0.94	525000	696000	19200000	0.75:1.00:27.56	42768	Bradyrhizobiaceae	Bradyrhizobium	Acetyl-CoA acetyltransferase OS=Bradyrhizobium erythrophlei OX=1437360 GN=SAMN05444170_3089 PE=3 SV=1
5548	37970	tr|A0A318TU11|A0A318TU11_9BRAD	5.99	20	2	2	2020000	1060000	8840000	7860000	2580000	2020000	5900000	8340000	7100000	10400000	6470000	5820000	0.78:0.41:3.43:3.05:1.00:0.78:2.29:3.24:2.76:4.05:2.51:2.26	5010000	4800000	12800000	1.04:1.00:2.66	15681	Bradyrhizobiaceae	Rhodopseudomonas	Phosphoribosyl-AMP cyclohydrolase OS=Rhodopseudomonas faecalis OX=99655 GN=hisI PE=3 SV=1
4146	4729	tr|A0A4R3MSN8|A0A4R3MSN8_9GAMM	12.38	20	4	4	13900000	13500000	10700000	8860000	13700000	12100000	10800000	12700000	7090000	7650000	3880000	2530000	1.01:0.98:0.78:0.65:1.00:0.88:0.79:0.93:0.52:0.56:0.28:0.18	11700000	12300000	6360000	0.95:1.00:0.52	24801	Chromatiaceae	Thiobaca	CRP/FNR family cyclic AMP-dependent transcriptional regulator OS=Thiobaca trueperi OX=127458 GN=EDC35_11260 PE=4 SV=1
680	551	tr|A0A4R3MX99|A0A4R3MX99_9GAMM	12.99	35	11	7	110000000	107000000	113000000	106000000	89800000	83200000	122000000	116000000	7080000	63000000	5030000	5630000	1.22:1.19:1.26:1.18:1.00:0.93:1.36:1.29:0.08:0.70:0.06:0.06	109000000	103000000	20200000	1.06:1.00:0.20	42484	Chromatiaceae	Thiobaca	Aminotransferase OS=Thiobaca trueperi OX=127458 GN=EDC35_10474 PE=3 SV=1
367	267	tr|G2E529|G2E529_9GAMM	3.35	23	14	4	12300000	6370000	4680000	4240000	2900000	2750000	6280000	5350000	7070000	7030000	3220000	2630000	4.24:2.19:1.61:1.46:1.00:0.95:2.17:1.84:2.44:2.42:1.11:0.91	6950000	4320000	4990000	1.61:1.00:1.15	71857	Chromatiaceae	Thiorhodococcus	Acetyl-coenzyme A synthetase OS=Thiorhodococcus drewsii AZ1 OX=765913 GN=acsA PE=3 SV=1
3341	54440	tr|A0A363TUH2|A0A363TUH2_9BRAD	37.73	19	4	2	7510000	4060000	3230000	3880000	1210000	786000	1230000	803000	7040000	4840000	9340000	6430000	6.23:3.37:2.68:3.22:1.00:0.65:1.02:0.67:5.83:4.02:7.75:5.33	4670000	1010000	6910000	4.64:1.00:6.87	42505	Bradyrhizobiaceae	0	ABC transporter permease OS=Bradyrhizobiaceae bacterium OX=2072420 GN=C3F17_05670 PE=4 SV=1
5289	56868	tr|A0A2Z4RQF1|A0A2Z4RQF1_PSEPU	13.93	12	2	2	10900000	11300000	7800000	5440000	16300000	17900000	10200000	14000000	7000000	4100000	4410000	395000	0.67:0.70:0.48:0.33:1.00:1.10:0.62:0.86:0.43:0.25:0.27:0.02	8870000	14600000	3980000	0.61:1.00:0.27	32756	0	0	Glucose-1-phosphate thymidylyltransferase OS=Pseudomonas putida OX=303 GN=rfbA PE=3 SV=1 Glucose-1-phosphate thymidylyltransferase OS=Pseudomonas delhiensis OX=366289 GN=SAMN05216189_1009157 PE=3 SV=1 Glucose-1-phosphate thymidylyltransferase OS=Rhizobiaceae bacterium OX=1913961 GN=rfbA PE=3 SV=1 Glucose-1-phosphate thymidylyltransferase OS=Sphingopyxis sp. H071 OX=1759078 GN=ATE69_08145 PE=3 SV=1
3786	1435	tr|A0A2S7XRY9|A0A2S7XRY9_9GAMM	6.71	36	4	3	32300000	34000000	30800000	26500000	27000000	26000000	26300000	32200000	6990000	67700000	2580000	5470000	1.20:1.26:1.14:0.98:1.00:0.96:0.97:1.19:0.26:2.51:0.10:0.20	30900000	27900000	21000000	1.11:1.00:0.75	16181	Chromatiaceae	Chromatium	NADH:ubiquinone oxidoreductase OS=Chromatium okenii OX=61644 GN=CXB77_10395 PE=4 SV=1
2959	24512	tr|A0A5M6HR05|A0A5M6HR05_9RHIZ	24.25	16	5	2	8910	255000	398000	149000	2040000	913000	1420000	2670000	6980000	6060000	7410000	8570000	0.02:0.13:0.20:0.07:1.00:0.45:0.69:1.31:3.42:2.97:3.63:4.20	203000	1960000	7250000	0.10:1.00:3.70	43537	Blastochloridaceae	Blastochloris	Arginine biosynthesis bifunctional protein ArgJ OS=Blastochloris sulfoviridis OX=50712 GN=argJ PE=3 SV=1
4847	27644	tr|A0A318T8J9|A0A318T8J9_9BRAD	34.97	7	2	2	5420000	3850000	3960000	4170000	2080000	2030000	2210000	1720000	6970000	7240000	5000000	4540000	2.61:1.85:1.90:2.01:1.00:0.98:1.06:0.83:3.35:3.48:2.40:2.18	4350000	2010000	5940000	2.16:1.00:2.95	34422	Bradyrhizobiaceae	Rhodopseudomonas	Aryl-alcohol dehydrogenase-like predicted oxidoreductase OS=Rhodopseudomonas faecalis OX=99655 GN=BJ122_13116 PE=4 SV=1
3310	25511	tr|A0A4R3N3U5|A0A4R3N3U5_9GAMM	13.18	14	5	5	3430000	9560000	11000000	10900000	14100000	14300000	11600000	12600000	6960000	5870000	1880000	5240000	0.24:0.68:0.78:0.77:1.00:1.02:0.82:0.90:0.49:0.42:0.13:0.37	9110000	13200000	5030000	0.69:1.00:0.38	35698	Chromatiaceae	Thiobaca	Acetyl-coenzyme A carboxylase carboxyl transferase subunit beta OS=Thiobaca trueperi OX=127458 GN=accD PE=3 SV=1
4913	55492	tr|A0A318TA93|A0A318TA93_9BRAD	24.74	22	3	2	984000	654000	256000	959000	138000	63500	765000	858000	6920000	5920000	4890000	4140000	7.15:4.76:1.86:6.98:1.00:0.46:5.56:6.24:50.32:43.06:35.55:30.12	713000	577000	5540000	1.24:1.00:9.60	22116	Bradyrhizobiaceae	Rhodopseudomonas	50S ribosomal protein L4 OS=Rhodopseudomonas faecalis OX=99655 GN=rplD PE=3 SV=1
5552	38047	tr|A0A318TDU4|A0A318TDU4_9BRAD	30.52	10	2	2	275000	275000	1460000	210000	335000	342000	296000	1050000	6850000	8420000	4370000	5470000	0.82:0.82:4.35:0.63:1.00:1.02:0.88:3.14:20.46:25.13:13.06:16.32	1470000	506000	6280000	2.91:1.00:12.41	23691	Bradyrhizobiaceae	Rhodopseudomonas	Thiamine-phosphate pyrophosphorylase OS=Rhodopseudomonas faecalis OX=99655 GN=BJ122_10965 PE=4 SV=1
4868	29124	tr|A0A5M6I275|A0A5M6I275_9RHIZ	12.79	11	3	3	483000	4320000	536000	307000	14300000	574000	1170000	591000	6830000	6000000	6320000	5360000	0.03:0.30:0.04:0.02:1.00:0.04:0.08:0.04:0.48:0.42:0.44:0.37	1990000	7580000	6130000	0.26:1.00:0.81	39454	Blastochloridaceae	Blastochloris	Dihydroorotase OS=Blastochloris sulfoviridis OX=50712 GN=pyrC PE=3 SV=1
3328	52677	tr|A0A2T4JC68|A0A2T4JC68_RHOBL	28.87	11	4	3	2240000	1960000	3000000	2370000	3020000	4340000	2240000	2190000	6770000	6590000	5490000	4770000	0.74:0.65:0.99:0.78:1.00:1.44:0.74:0.73:2.24:2.18:1.82:1.58	2750000	2950000	7560000	0.93:1.00:2.56	58022	Rhodobacteraceae	Rhodobacter	Phosphoenolpyruvate carboxykinase (ATP) OS=Rhodobacter blasticus DSM 2131 OX=1188250 GN=pckA PE=3 SV=1
1494	22697	tr|A0A5M6I6G1|A0A5M6I6G1_9RHIZ	20.32	15	9	3	82800	2290000	3280000	3640000	3280000	3430000	2730000	1850000	6670000	7430000	5940000	6180000	0.03:0.70:1.00:1.11:1.00:1.04:0.83:0.56:2.03:2.26:1.81:1.88	2340000	3150000	6550000	0.74:1.00:2.08	67214	Blastochloridaceae	Blastochloris	50S ribosomal subunit assembly factor BipA OS=Blastochloris sulfoviridis OX=50712 GN=typA PE=3 SV=1
1356	899	tr|A0A495V901|A0A495V901_9GAMM	3.67	13	7	2	6900000	7510000	7240000	6330000	7720000	6730000	6990000	8490000	6640000	2790000	7570000	6670000	0.89:0.97:0.94:0.82:1.00:0.87:0.90:1.10:0.86:0.36:0.98:0.86	6990000	7480000	5920000	0.93:1.00:0.79	81742	Chromatiaceae	Thiocapsa	Malate dehydrogenase (Oxaloacetate-decarboxylating)(NADP+) OS=Thiocapsa rosea OX=69360 GN=BDD21_2251 PE=3 SV=1
5010	29911	tr|A0A4R3MVS7|A0A4R3MVS7_9GAMM	16.39	3	2	2	6770000	7430000	6510000	5670000	8530000	8280000	12200000	10200000	6630000	6050000	4660000	6890000	0.79:0.87:0.76:0.67:1.00:0.97:1.43:1.20:0.78:0.71:0.55:0.81	6590000	9800000	6060000	0.67:1.00:0.62	95451	Chromatiaceae	Thiobaca	PAS domain S-box-containing protein/diguanylate cyclase (GGDEF)-like protein OS=Thiobaca trueperi OX=127458 GN=EDC35_11612 PE=4 SV=1
368	319	tr|A0A4R3N1C1|A0A4R3N1C1_9GAMM	29.76	13	12	7	49300000	44800000	40500000	39500000	27100000	28700000	42000000	40100000	6610000	12900000	10700000	6870000	1.82:1.65:1.50:1.46:1.00:1.06:1.55:1.48:0.24:0.48:0.39:0.25	45000000	34500000	10200000	1.31:1.00:0.30	96766	Chromatiaceae	Thiobaca	P-type Ca(2+) transporter OS=Thiobaca trueperi OX=127458 GN=EDC35_105307 PE=4 SV=1
616	51030	tr|A0A0R3MLK7|A0A0R3MLK7_9BRAD	10.77	31	12	2	4200000	4410000	4410000	3510000	4180000	3620000	3270000	2490000	6610000	5460000	3890000	6360000	1.00:1.06:1.06:0.84:1.00:0.87:0.78:0.60:1.58:1.31:0.93:1.52	4160000	3390000	5580000	1.23:1.00:1.65	34068	Bradyrhizobiaceae	Bradyrhizobium	Malate dehydrogenase OS=Bradyrhizobium lablabi OX=722472 GN=mdh PE=3 SV=1
3751	27792	tr|A0A348G514|A0A348G514_9RHIZ	10.52	5	4	4	10700000	8040000	9870000	10500000	6190000	6610000	8960000	10300000	6570000	5270000	4680000	1620000	1.72:1.30:1.60:1.70:1.00:1.07:1.45:1.67:1.06:0.85:0.76:0.26	9780000	8090000	5020000	1.21:1.00:0.62	143744	Blastochloridaceae	Blastochloris	4-alpha-glucanotransferase OS=Blastochloris tepida OX=2233851 GN=BLTE_33320 PE=3 SV=1
5511	30558	tr|A0A5M6HRH2|A0A5M6HRH2_9RHIZ	55.66	11	2	2	701000	457000	1380000	2860000	1580000	1740000	1590000	1450000	6500000	6080000	7190000	7100000	0.44:0.29:0.88:1.82:1.00:1.10:1.01:0.92:4.12:3.86:4.56:4.51	1580000	1590000	6720000	0.99:1.00:4.23	31261	Blastochloridaceae	Blastochloris	Carbon-nitrogen hydrolase family protein OS=Blastochloris sulfoviridis OX=50712 GN=F1193_13235 PE=3 SV=1
989	1393	tr|A0A4R3MW35|A0A4R3MW35_9GAMM	44.75	31	8	8	120000000	117000000	118000000	168000000	102000000	112000000	88000000	129000000	6430000	6450000	2820000	4200000	1.18:1.15:1.16:1.65:1.00:1.10:0.86:1.27:0.06:0.06:0.03:0.04	131000000	116000000	5070000	1.13:1.00:0.04	18649	Chromatiaceae	Thiobaca	50S ribosomal protein L6 OS=Thiobaca trueperi OX=127458 GN=rplF PE=3 SV=1
5554	38065	tr|A0A318TDJ5|A0A318TDJ5_9BRAD	17.38	18	2	2	1700000	1950000	67400	1270000	19000	0	145000	174000	6430000	5840000	4090000	5620000	64.00:64.00:3.55:64.00:1.00:0:7.65:9.15:64.00:64.00:64.00:64.00	1310000	165000	5490000	7.93:1.00:33.34	14557	Bradyrhizobiaceae	Rhodopseudomonas	PhnB protein OS=Rhodopseudomonas faecalis OX=99655 GN=BJ122_10972 PE=4 SV=1
5506	29589	tr|A0A348G569|A0A348G569_9RHIZ	6.32	3	2	2	5380000	5820000	5140000	4400000	5020000	4440000	2670000	3250000	6420000	45800000	2970000	2870000	1.07:1.16:1.02:0.88:1.00:0.89:0.53:0.65:1.28:9.13:0.59:0.57	5270000	5110000	15100000	1.03:1.00:2.95	122808	Blastochloridaceae	Blastochloris	Uncharacterized protein OS=Blastochloris tepida OX=2233851 GN=BLTE_33870 PE=4 SV=1
2313	51337	tr|A0A2T4JA66|A0A2T4JA66_RHOBL	52.02	18	5	4	29600000	28900000	31600000	32900000	8180000	8370000	12500000	12400000	6350000	5510000	6120000	4900000	3.62:3.53:3.86:4.02:1.00:1.02:1.53:1.52:0.78:0.67:0.75:0.60	30700000	10400000	5720000	2.96:1.00:0.55	39760	Rhodobacteraceae	Rhodobacter	Branched-chain amino acid ABC transporter substrate-binding protein OS=Rhodobacter blasticus DSM 2131 OX=1188250 GN=C5F44_08225 PE=4 SV=1
267	132	tr|A0A4R3MUS8|A0A4R3MUS8_9GAMM	36.19	57	15	15	68600000	70800000	78200000	52900000	61900000	61500000	60400000	65400000	6340000	5620000	3100000	3920000	1.11:1.14:1.26:0.85:1.00:0.99:0.98:1.06:0.10:0.09:0.05:0.06	69600000	62300000	5000000	1.12:1.00:0.08	41636	Chromatiaceae	Thiobaca	D-3-phosphoglycerate dehydrogenase OS=Thiobaca trueperi OX=127458 GN=EDC35_109124 PE=3 SV=1
5218	5397	tr|A0A4R3MUL9|A0A4R3MUL9_9GAMM	52.17	13	2	2	65300000	52800000	44600000	42200000	45900000	37000000	53900000	50700000	6340000	7510000	5010000	5450000	1.42:1.15:0.97:0.92:1.00:0.81:1.17:1.10:0.14:0.16:0.11:0.12	51200000	46900000	6080000	1.09:1.00:0.13	17932	Chromatiaceae	Thiobaca	Peptidyl-prolyl cis-trans isomerase OS=Thiobaca trueperi OX=127458 GN=EDC35_11068 PE=3 SV=1
2838	20340	tr|A0A348G4M2|A0A348G4M2_9RHIZ	25.09	39	3	3	1420000	2040000	686000	844000	2090000	2710000	12600000	16800000	6310000	12000000	7410000	9240000	0.68:0.98:0.33:0.40:1.00:1.30:6.04:8.04:3.02:5.73:3.55:4.43	1260000	10600000	9260000	0.12:1.00:0.88	11392	Blastochloridaceae	Blastochloris	Thioredoxin OS=Blastochloris tepida OX=2233851 GN=trxA_2 PE=3 SV=1
2393	22741	tr|A0A348G0V3|A0A348G0V3_9RHIZ	18.29	15	5	3	759000	1240000	111000	302000	2290000	2110000	1700000	3680000	6220000	25200000	10100000	5090000	0.33:0.54:0.05:0.13:1.00:0.92:0.74:1.60:2.71:10.98:4.39:2.22	832000	2930000	11700000	0.28:1.00:3.97	49614	Blastochloridaceae	Blastochloris	Pyruvate dehydrogenase E1 component subunit beta OS=Blastochloris tepida OX=2233851 GN=pdhB PE=4 SV=1
3374	23426	tr|A0A5M6I5A2|A0A5M6I5A2_9RHIZ	28.56	10	5	4	9520000	11600000	12100000	12000000	11200000	11700000	12500000	17600000	6200000	5030000	3910000	5380000	0.85:1.04:1.09:1.08:1.00:1.05:1.12:1.58:0.56:0.45:0.35:0.48	11400000	13200000	5680000	0.86:1.00:0.43	57782	Blastochloridaceae	Blastochloris	Alpha-D-glucose phosphate-specific phosphoglucomutase OS=Blastochloris sulfoviridis OX=50712 GN=F1193_01830 PE=3 SV=1
4074	24985	tr|A0A4R3N1X8|A0A4R3N1X8_9GAMM	25.78	7	4	4	7160000	6350000	6550000	10600000	15100000	15400000	10600000	14400000	6190000	6660000	4030000	6120000	0.47:0.42:0.43:0.70:1.00:1.02:0.70:0.95:0.41:0.44:0.27:0.40	9560000	13900000	6470000	0.69:1.00:0.47	61879	Chromatiaceae	Thiobaca	ATP-binding cassette subfamily C protein EexD OS=Thiobaca trueperi OX=127458 GN=EDC35_102196 PE=4 SV=1
2454	54436	tr|A0A2E1XV11|A0A2E1XV11_9RHIZ	44.61	28	5	2	854000	958000	1070000	1140000	8620000	9630000	5440000	6250000	6180000	7640000	5890000	4150000	0.10:0.11:0.12:0.13:1.00:1.12:0.63:0.72:0.72:0.89:0.68:0.48	1010000	7570000	5970000	0.13:1.00:0.79	13985	Phyllobacteriaceae	0	30S ribosomal protein S13 OS=Phyllobacteriaceae bacterium OX=1871068 GN=rpsM PE=3 SV=1
278	50531	tr|A0A254VNR3|A0A254VNR3_9BURK	13.65	11	16	2	0	287000	76800	0	1310000	1690000	240000	710000	6160000	6920000	7100000	7130000	0:0.22:0.06:0:1.00:1.29:0.18:0.54:4.72:5.30:5.44:5.46	182000	1040000	6830000	0.17:1.00:6.53	155092	Comamonadaceae	Xenophilus	DNA-directed RNA polymerase subunit beta' OS=Xenophilus sp. AP218F OX=2014876 GN=rpoC PE=3 SV=1
759	1679	tr|L0H0U6|L0H0U6_9GAMM	61.28	18	9	3	123000000	129000000	138000000	140000000	70400000	77500000	109000000	114000000	6110000	7660000	5930000	5740000	1.74:1.83:1.97:1.98:1.00:1.10:1.55:1.62:0.09:0.11:0.08:0.08	132000000	92700000	6830000	1.43:1.00:0.07	70063	Chromatiaceae	Thioflavicoccus	Chaperone protein DnaK OS=Thioflavicoccus mobilis 8321 OX=765912 GN=dnaK PE=2 SV=1
3183	24839	tr|A0A348FYR0|A0A348FYR0_9RHIZ	0	14	3	3	0	196000	0	0	56900	80900	383000	185000	6110000	4800000	9140000	8070000	0:3.45:0:0:1.00:1.42:6.73:3.25:64.00:64.00:64.00:64.00	196000	289000	8960000	0.68:1.00:31.00	39564	Blastochloridaceae	Blastochloris	Cytochrome c biogenesis protein CcsA OS=Blastochloris tepida OX=2233851 GN=BLTE_11280 PE=4 SV=1
1332	26519	tr|A0A433ACT7|A0A433ACT7_HYPSQ	9.39	14	7	2	1750000	1540000	5660000	4940000	1780000	1660000	5100000	4590000	6100000	6390000	5150000	5470000	0.98:0.86:3.17:2.77:1.00:0.93:2.86:2.58:3.42:3.59:2.89:3.07	3520000	3310000	5780000	1.06:1.00:1.75	91626	Hyphomicrobiaceae	Hyphomicrobium	Arylsulfatase OS=Hyphomicrobium sp. OX=82 GN=EKK30_01995 PE=3 SV=1
4909	55281	tr|A0A2T0P909|A0A2T0P909_RHITR	23.19	11	3	2	2070000	2820000	1320000	1390000	685000	1320000	1640000	1620000	6100000	5090000	3180000	4510000	3.02:4.12:1.92:2.03:1.00:1.93:2.40:2.37:8.90:7.42:4.64:6.58	1900000	1320000	4720000	1.44:1.00:3.58	41030	Rhizobiaceae	Rhizobium	Acetyl-CoA C-acetyltransferase OS=Rhizobium tropici OX=398 GN=NA75_10411 PE=3 SV=1
3449	23391	tr|A0A5M6HUG1|A0A5M6HUG1_9RHIZ	13.88	14	5	5	7870000	7320000	7420000	7250000	3670000	3800000	5940000	5230000	6070000	6510000	8640000	7430000	2.14:1.99:2.02:1.97:1.00:1.04:1.62:1.43:1.65:1.77:2.35:2.02	7590000	4790000	7160000	1.58:1.00:1.50	46955	Blastochloridaceae	Blastochloris	Ribulose 1 5-bisphosphate carboxylase OS=Blastochloris sulfoviridis OX=50712 GN=F1193_12175 PE=3 SV=1
4121	53994	tr|A0A2M8ZYI9|A0A2M8ZYI9_9BRAD	63.58	12	4	3	234000	2930000	81200	60600	28000	29000	0	0	6070000	8400000	6400000	7510000	8.37:64.00:2.90:2.16:1.00:1.04:0:0:64.00:64.00:64.00:64.00	901000	28500	7920000	31.60:1.00:64.00	44571	Bradyrhizobiaceae	Afipia	Glutaryl-CoA dehydrogenase OS=Afipia broomeae OX=56946 GN=BKA77_7503 PE=3 SV=1
2774	2678	tr|A0A4R3NA04|A0A4R3NA04_9GAMM	8.53	14	5	2	15000000	13500000	15100000	13100000	11700000	18000000	40800000	13300000	6040000	318000	0	374000	1.29:1.16:1.30:1.12:1.00:1.54:3.50:1.14:0.52:0.03:0:0.03	14200000	29700000	6060000	0.48:1.00:0.20	36755	Chromatiaceae	Thiobaca	Phosphate ABC transporter substrate-binding protein (PhoT family) OS=Thiobaca trueperi OX=127458 GN=EDC35_101310 PE=4 SV=1
349	148	tr|A0A4R3N5G1|A0A4R3N5G1_9GAMM	34.67	38	15	4	59800000	36400000	48700000	42300000	27800000	27500000	50300000	50700000	6000000	8100000	12000000	7300000	2.15:1.31:1.75:1.52:1.00:0.99:1.81:1.82:0.22:0.29:0.43:0.26	46800000	39100000	8350000	1.20:1.00:0.21	49207	Chromatiaceae	Thiobaca	Glutamate dehydrogenase OS=Thiobaca trueperi OX=127458 GN=EDC35_103127 PE=3 SV=1
3594	28574	tr|A0A318THG6|A0A318THG6_9BRAD	19.69	3	2	2	539000	205000	1290000	899000	1090000	73500	185000	1140000	5980000	7060000	3160000	3040000	0.50:0.19:1.19:0.83:1.00:0.07:0.17:1.05:5.49:6.49:2.90:2.79	868000	744000	4810000	1.17:1.00:6.47	100124	Bradyrhizobiaceae	Rhodopseudomonas	DNA topoisomerase 1 OS=Rhodopseudomonas faecalis OX=99655 GN=topA PE=3 SV=1
3987	26028	tr|A0A3S0FV87|A0A3S0FV87_9BRAD	39.08	20	3	3	28400	112000	73600	100000	38600	44000	47800	275000	5960000	8140000	4850000	5150000	0.74:2.91:1.91:2.60:1.00:1.14:1.24:7.12:64.00:64.00:64.00:64.00	78700	264000	6020000	0.30:1.00:22.85	35897	Bradyrhizobiaceae	0	MoxR family ATPase OS=Bradyrhizobiaceae bacterium OX=2072420 GN=EKK40_01325 PE=4 SV=1
5527	34010	tr|A0A318TDT0|A0A318TDT0_9BRAD	6.77	23	2	2	953000	1070000	44000	83800	0	0	0	0	5850000	395000	624000	820000	64.00:64.00:64.00:64.00:-:-:-:-:64.00:64.00:64.00:64.00	547000	0	3210000	64.00:-:64.00	16785	Bradyrhizobiaceae	Rhodopseudomonas	Uncharacterized protein (TIGR02284 family) OS=Rhodopseudomonas faecalis OX=99655 GN=BJ122_11090 PE=4 SV=1
1153	1690	tr|A0A4R3MZP0|A0A4R3MZP0_9GAMM	25.88	27	10	10	18600000	20200000	19300000	20200000	9970000	12600000	23300000	14600000	5800000	8080000	4830000	4240000	1.87:2.03:1.94:2.03:1.00:1.26:2.34:1.47:0.58:0.81:0.48:0.43	20500000	16300000	5740000	1.26:1.00:0.35	51501	Chromatiaceae	Thiobaca	Signal recognition particle protein OS=Thiobaca trueperi OX=127458 GN=ffh PE=3 SV=1
5472	64827	tr|A0A1S8FEL0|A0A1S8FEL0_9BURK	12.92	10	2	2	257000	0	0	31800	292000	945000	1380000	1760000	5740000	7490000	8860000	9820000	0.88:0:0:0.11:1.00:3.24:4.73:6.02:19.66:25.67:30.36:33.64	144000	1090000	7980000	0.13:1.00:7.29	20761	Comamonadaceae	Polaromonas	Ribosome-recycling factor OS=Polaromonas sp. A23 OX=1944133 GN=frr PE=3 SV=1 Ribosome-recycling factor OS=Polaromonas sp. CG9_12 OX=1504672 GN=frr PE=3 SV=1
3390	25342	tr|A0A348G5M6|A0A348G5M6_9RHIZ	37.94	5	3	3	931000	535000	976000	500000	2590000	2460000	3520000	2220000	5730000	6920000	6390000	5340000	0.36:0.21:0.38:0.19:1.00:0.95:1.36:0.86:2.21:2.67:2.47:2.06	750000	3170000	6090000	0.24:1.00:1.92	71934	Blastochloridaceae	Blastochloris	ABC transporter substrate-binding protein OS=Blastochloris tepida OX=2233851 GN=BLTE_35440 PE=3 SV=1
5604	64406	tr|A0A2T0NR92|A0A2T0NR92_RHITR	30.99	12	2	2	49300	46400	157000	150000	488000	353000	73600	23400	5730000	3320000	1770000	2390000	0.10:0.09:0.32:0.31:1.00:0.72:0.15:0.05:11.74:6.79:3.63:4.89	101000	256000	3300000	0.39:1.00:12.92	26112	Rhizobiaceae	Rhizobium	Cell cycle transcriptional regulator CtrA OS=Rhizobium tropici OX=398 GN=NA75_119154 PE=4 SV=1
4188	28815	tr|A0A5M6I5T4|A0A5M6I5T4_9RHIZ	24.14	14	3	3	2500000	2240000	1480000	2160000	29800000	7390000	35300000	6270000	5710000	6200000	4590000	3730000	0.08:0.08:0.05:0.07:1.00:0.25:1.18:0.21:0.19:0.21:0.15:0.13	2180000	24300000	5060000	0.09:1.00:0.21	14868	Blastochloridaceae	Blastochloris	50S ribosomal protein L17 OS=Blastochloris sulfoviridis OX=50712 GN=rplQ PE=3 SV=1
5381	30294	tr|A0A5M6I441|A0A5M6I441_9RHIZ	24.45	6	2	2	82400	0	282000	160000	1490000	1810000	1840000	828000	5700000	6700000	2070000	5590000	0.06:0:0.19:0.11:1.00:1.21:1.23:0.56:3.83:4.49:1.39:3.75	229000	1490000	5880000	0.15:1.00:3.94	57664	Blastochloridaceae	Blastochloris	UDP-N-acetylmuramoyl-tripeptide--D-alanyl-D-alanine ligase OS=Blastochloris sulfoviridis OX=50712 GN=F1193_03820 PE=4 SV=1
3887	24786	tr|A0A318TLU6|A0A318TLU6_9BRAD	20.76	19	4	4	5690000	5710000	3560000	4430000	1380000	3250000	1380000	1790000	5680000	5930000	6530000	6540000	4.13:4.15:2.58:3.22:1.00:2.36:1.00:1.30:4.12:4.31:4.74:4.75	4850000	1950000	6170000	2.49:1.00:3.17	28772	Bradyrhizobiaceae	Rhodopseudomonas	Enoyl-CoA hydratase OS=Rhodopseudomonas faecalis OX=99655 GN=BJ122_10262 PE=3 SV=1
350	226	tr|A0A6G7VFR0|A0A6G7VFR0_9GAMM	50.22	29	11	2	43700000	46900000	51500000	49400000	45700000	46100000	70900000	71200000	5670000	7660000	6490000	7690000	0.95:1.03:1.13:1.08:1.00:1.01:1.55:1.56:0.12:0.17:0.14:0.17	47900000	58500000	6970000	0.82:1.00:0.12	49996	Chromatiaceae	Caldichromatium	ATP synthase subunit beta OS=Chromatiaceae bacterium No.7 OX=2699430 GN=atpD PE=3 SV=1
4081	25465	tr|A0A318TB74|A0A318TB74_9BRAD	24.69	10	2	2	2170000	844000	96600	477000	345000	990000	715000	1280000	5670000	7600000	8580000	3730000	6.28:2.44:0.28:1.38:1.00:2.86:2.07:3.69:16.41:22.00:24.85:10.80	1120000	1020000	8210000	1.09:1.00:8.01	31531	Bradyrhizobiaceae	Rhodopseudomonas	Citronellol/citronellal dehydrogenase OS=Rhodopseudomonas faecalis OX=99655 GN=BJ122_12927 PE=4 SV=1
5574	57798	tr|A0A2T4J7A6|A0A2T4J7A6_RHOBL	31.25	17	2	2	1070000	1130000	748000	504000	84400	166000	564000	523000	5670000	3810000	9630000	6510000	12.67:13.43:8.87:5.97:1.00:1.97:6.69:6.20:64.00:45.16:64.00:64.00	873000	335000	6410000	2.61:1.00:19.14	18656	Rhodobacteraceae	Rhodobacter	Cell shape determination protein CcmA OS=Rhodobacter blasticus DSM 2131 OX=1188250 GN=C5F44_12050 PE=4 SV=1
5517	32233	tr|A0A348FVL1|A0A348FVL1_9RHIZ	35.04	11	2	2	2410000	2700000	2780000	2750000	2450000	4870000	3880000	2010000	5640000	5150000	4480000	5200000	0.98:1.10:1.14:1.12:1.00:1.99:1.58:0.82:2.30:2.10:1.83:2.12	2660000	3490000	5120000	0.76:1.00:1.47	13761	Blastochloridaceae	Blastochloris	Uncharacterized protein OS=Blastochloris tepida OX=2233851 GN=BLTE_00290 PE=4 SV=1
3247	25340	tr|A0A318TNY3|A0A318TNY3_9BRAD	18.08	15	3	3	2320000	2170000	1600000	1810000	1460000	1450000	1950000	2040000	5600000	5070000	3990000	2590000	1.59:1.49:1.10:1.24:1.00:0.99:1.33:1.40:3.84:3.47:2.73:1.77	2060000	1760000	5710000	1.17:1.00:3.24	29685	Bradyrhizobiaceae	Rhodopseudomonas	O-phosphoserine phosphohydrolase OS=Rhodopseudomonas faecalis OX=99655 GN=BJ122_1235 PE=3 SV=1
4548	56363	tr|A0A023XPW8|A0A023XPW8_BRAJP	33.92	13	3	3	26500	191000	41400	31800	42700	78700	22500	4630	5570000	5850000	2790000	4470000	0.62:4.48:0.97:0.74:1.00:1.85:0.53:0.11:64.00:64.00:64.00:64.00	72700	37100	4670000	1.96:1.00:64.00	43436	Bradyrhizobiaceae	Bradyrhizobium	Acyl-CoA dehydrogenase OS=Bradyrhizobium japonicum SEMIA 5079 OX=476282 GN=BJS_01759 PE=3 SV=1
294	718	tr|D3RTD7|D3RTD7_ALLVD	31.21	19	15	2	21200000	11600000	23600000	25400000	26600000	29400000	41000000	41900000	5500000	3370000	3150000	0	0.80:0.44:0.89:0.95:1.00:1.10:1.54:1.57:0.21:0.13:0.12:0	20500000	34700000	4010000	0.59:1.00:0.12	95593	Chromatiaceae	Allochromatium	Aconitate hydratase OS=Allochromatium vinosum (strain ATCC 17899 / DSM 180 / NBRC 103801 / NCIMB 10441 / D) OX=572477 GN=Alvin_1513 PE=3 SV=1
2825	2451	tr|A0A4R3N6L2|A0A4R3N6L2_9GAMM	26.82	24	5	5	41300000	41100000	7480000	21700000	14600000	28100000	33000000	28200000	5480000	3370000	6330000	5750000	2.82:2.81:0.51:1.48:1.00:1.92:2.25:1.93:0.37:0.23:0.43:0.39	31100000	35400000	6330000	0.88:1.00:0.18	27003	Chromatiaceae	Thiobaca	Uroporphyrinogen-III synthase OS=Thiobaca trueperi OX=127458 GN=EDC35_10179 PE=3 SV=1
4100	27575	tr|A0A0H5BDS0|A0A0H5BDS0_BLAVI	4.92	20	5	2	3830000	683000	1490000	6190000	3150000	2780000	6450000	5880000	5440000	6030000	4930000	4280000	1.22:0.22:0.47:1.97:1.00:0.88:2.05:1.87:1.73:1.92:1.57:1.36	3100000	4570000	5170000	0.68:1.00:1.13	41834	Blastochloridaceae	Blastochloris	Phosphoserine aminotransferase OS=Blastochloris viridis OX=1079 GN=serC PE=4 SV=1
3303	23887	tr|A0A318TBH4|A0A318TBH4_9BRAD	12.74	8	4	4	5780000	8030000	5270000	5930000	5860000	5770000	7990000	7310000	5430000	3350000	3130000	2190000	0.99:1.37:0.90:1.01:1.00:0.98:1.36:1.25:0.93:0.57:0.53:0.37	6300000	6770000	3520000	0.93:1.00:0.52	93127	Bradyrhizobiaceae	Rhodopseudomonas	Histidine kinase OS=Rhodopseudomonas faecalis OX=99655 GN=BJ122_12733 PE=4 SV=1
184	146	tr|A0A4R3N1R4|A0A4R3N1R4_9GAMM	57	46	18	11	69500000	74000000	65600000	66600000	75100000	73600000	81500000	85200000	5420000	3800000	4280000	3390000	0.93:0.99:0.87:0.89:1.00:0.98:1.09:1.13:0.07:0.05:0.06:0.05	68900000	78900000	4220000	0.87:1.00:0.05	53625	Chromatiaceae	Thiobaca	Glutamate synthase (NADH) small subunit OS=Thiobaca trueperi OX=127458 GN=EDC35_103129 PE=4 SV=1
5509	30389	tr|A0A5M6HR46|A0A5M6HR46_9RHIZ	21.31	3	2	2	68500	0	442000	676000	559000	391000	1500000	1000000	5420000	4640000	13200000	12500000	0.12:0:0.79:1.21:1.00:0.70:2.69:1.79:9.70:8.30:23.69:22.40	427000	1270000	15600000	0.33:1.00:12.27	70827	Blastochloridaceae	Blastochloris	Potassium-transporting ATPase ATP-binding subunit OS=Blastochloris sulfoviridis OX=50712 GN=kdpB PE=3 SV=1
2180	23503	tr|A0A318TEG2|A0A318TEG2_9BRAD	37.6	16	6	5	6000000	5860000	6990000	6180000	3290000	3860000	3580000	3700000	5410000	6180000	7850000	6930000	1.82:1.78:2.12:1.87:1.00:1.17:1.09:1.12:1.64:1.88:2.38:2.10	7000000	3610000	6590000	1.94:1.00:1.83	68163	Bradyrhizobiaceae	Rhodopseudomonas	Carbamoyltransferase OS=Rhodopseudomonas faecalis OX=99655 GN=BJ122_12041 PE=3 SV=1
1189	3498	tr|A0A4R3MZ46|A0A4R3MZ46_9GAMM	24.81	26	10	7	10700000	16800000	10700000	11200000	12600000	11200000	5870000	6280000	5390000	5990000	4170000	4200000	0.85:1.34:0.85:0.89:1.00:0.89:0.47:0.50:0.43:0.48:0.33:0.33	13800000	9990000	4940000	1.39:1.00:0.49	50970	Chromatiaceae	Thiobaca	Zinc protease OS=Thiobaca trueperi OX=127458 GN=EDC35_10378 PE=3 SV=1
4034	1881	tr|A0A4R3N4J1|A0A4R3N4J1_9GAMM	16.19	21	4	4	15700000	12100000	11400000	13800000	6470000	9450000	14800000	12400000	5370000	868000	2830000	2260000	2.43:1.86:1.77:2.13:1.00:1.46:2.29:1.92:0.83:0.13:0.44:0.35	16800000	10900000	2990000	1.54:1.00:0.27	26790	Chromatiaceae	Thiobaca	Ubiquinone biosynthesis O-methyltransferase OS=Thiobaca trueperi OX=127458 GN=ubiG PE=3 SV=1
4446	55084	tr|A0A2T4J6N8|A0A2T4J6N8_RHOBL	35.42	41	3	2	939000	1430000	484000	433000	282000	380000	662000	614000	5370000	3670000	5860000	5210000	3.32:5.05:1.71:1.54:1.00:1.35:2.34:2.17:19.00:13.00:20.75:18.47	821000	528000	5470000	1.55:1.00:10.36	15786	Rhodobacteraceae	Rhodobacter	Phasin OS=Rhodobacter blasticus DSM 2131 OX=1188250 GN=C5F44_13495 PE=4 SV=1
343	20822	tr|A0A7L4TAM7|A0A7L4TAM7_9BRAD	0	32	13	2	437000	0	0	0	919000	331000	6030000	8100000	5340000	10900000	4980000	2640000	0.48:0:0:0:1.00:0.36:6.56:8.82:5.81:11.84:5.41:2.87	437000	5350000	6930000	0.08:1.00:1.30	60550	Bradyrhizobiaceae	Afipia	Isocitrase OS=Afipia sp. TMED4 OX=1986602 GN=CBB64_04775 PE=4 SV=1
3359	4526	tr|A0A4R3N0C7|A0A4R3N0C7_9GAMM	24.35	10	5	4	10200000	10900000	10100000	9570000	10000000	17900000	11400000	9200000	5340000	3870000	3410000	5050000	1.02:1.09:1.01:0.96:1.00:1.78:1.14:0.92:0.53:0.39:0.34:0.50	10200000	12100000	4540000	0.84:1.00:0.37	61685	Chromatiaceae	Thiobaca	Malate dehydrogenase (Oxaloacetate-decarboxylating)(NADP+) OS=Thiobaca trueperi OX=127458 GN=EDC35_103253 PE=3 SV=1
5093	6261	tr|W9VCE5|W9VCE5_9GAMM	46.39	15	2	2	46500000	29200000	34900000	33700000	12700000	15100000	24100000	20100000	5320000	5660000	4880000	3970000	3.68:2.31:2.76:2.66:1.00:1.19:1.91:1.59:0.42:0.45:0.39:0.31	39200000	25600000	5030000	1.53:1.00:0.20	9566	Chromatiaceae	0	30S ribosomal protein S16 OS=Imhoffiella purpurea OX=1249627 GN=rpsP PE=3 SV=1 30S ribosomal protein S16 OS=Allochromatium vinosum (strain ATCC 17899 / DSM 180 / NBRC 103801 / NCIMB 10441 / D) OX=572477 GN=rpsP PE=3 SV=1 30S ribosomal protein S16 OS=Chromatium okenii OX=61644 GN=rpsP PE=3 SV=1 30S ribosomal protein S16 OS=Thiorhodococcus minor OX=57489 GN=rpsP PE=3 SV=1 30S ribosomal protein S16 …
1357	986	tr|A0A4R3N006|A0A4R3N006_9GAMM	43.33	11	7	4	27900000	26700000	29100000	25800000	25300000	18500000	28200000	29100000	5300000	4020000	5880000	4760000	1.10:1.06:1.15:1.02:1.00:0.73:1.11:1.15:0.21:0.16:0.23:0.19	27400000	25300000	5030000	1.08:1.00:0.20	84110	Chromatiaceae	Thiobaca	Type IV pilus assembly protein PilQ OS=Thiobaca trueperi OX=127458 GN=EDC35_103122 PE=3 SV=1
3976	24012	tr|A0A318TD30|A0A318TD30_9BRAD	24.73	4	2	2	1230000	1930000	1600000	979000	1140000	3040000	19000	8350000	5290000	8510000	4070000	7210000	1.09:1.70:1.41:0.86:1.00:2.67:0.02:7.34:4.65:7.48:3.58:6.34	1540000	5240000	7120000	0.29:1.00:1.36	46273	Bradyrhizobiaceae	Rhodopseudomonas	Phosphoribosylamine--glycine ligase OS=Rhodopseudomonas faecalis OX=99655 GN=purD PE=3 SV=1
3279	2477	tr|A0A1H3GIK1|A0A1H3GIK1_ALLWA	41.73	14	5	3	34500000	31700000	36900000	38600000	39600000	38000000	39300000	39800000	5270000	4350000	6650000	6130000	0.87:0.80:0.93:0.98:1.00:0.96:0.99:1.01:0.13:0.11:0.17:0.15	35500000	39100000	6480000	0.91:1.00:0.17	29486	Chromatiaceae	Allochromatium	2 3 4 5-tetrahydropyridine-2 6-dicarboxylate N-succinyltransferase OS=Allochromatium warmingii OX=61595 GN=dapD PE=3 SV=1
3851	55832	tr|A0A2D4Y6W2|A0A2D4Y6W2_9SPHN	20.26	13	3	2	457000	363000	22800	448000	288000	159000	1130000	1120000	5240000	4980000	5360000	5710000	1.58:1.26:0.08:1.55:1.00:0.55:3.93:3.88:18.17:17.27:18.59:19.80	388000	832000	5320000	0.47:1.00:6.40	37474	Sphingomonadaceae	0	Fumarate reductase (Quinol) flavoprotein subunit (Fragment) OS=Sphingomonadaceae bacterium OX=1930536 GN=CMN67_12895 PE=4 SV=1
966	1731	tr|A0A4R3N330|A0A4R3N330_9GAMM	54.08	37	11	7	177000000	178000000	166000000	135000000	127000000	137000000	144000000	145000000	5210000	4130000	2920000	3780000	1.40:1.40:1.31:1.06:1.00:1.08:1.14:1.15:0.04:0.03:0.02:0.03	164000000	157000000	4660000	1.05:1.00:0.03	49423	Chromatiaceae	Thiobaca	Tryptophan synthase beta chain OS=Thiobaca trueperi OX=127458 GN=trpB PE=3 SV=1
1273	22206	tr|Q07TL0|Q07TL0_RHOP5	24.19	12	7	2	777000	938000	2510000	59100	908000	1780000	1920000	1280000	5210000	12700000	6680000	5820000	0.86:1.03:2.77:0.07:1.00:1.96:2.11:1.41:5.74:13.98:7.36:6.41	1070000	1730000	10800000	0.62:1.00:6.25	104100	Bradyrhizobiaceae	Rhodopseudomonas	Sulfide dehydrogenase (Flavoprotein) subunit SudA / sulfide dehydrogenase (Flavoprotein) subunit SudB OS=Rhodopseudomonas palustris (strain BisA53) OX=316055 GN=RPE_0767 PE=4 SV=1
2650	54031	tr|A0A5C8WD23|A0A5C8WD23_9RHIZ	45.83	17	4	2	672000	836000	658000	508000	110000	487000	172000	119000	5180000	6390000	5270000	4240000	6.11:7.60:5.98:4.62:1.00:4.43:1.57:1.08:47.07:58.09:47.87:38.55	669000	222000	5270000	3.01:1.00:23.72	33493	Methylobacteriaceae	Methylobacterium	Malate dehydrogenase OS=Methylobacterium sp. WL6 OX=2603901 GN=mdh PE=3 SV=1
4740	28314	tr|A0A318TBB6|A0A318TBB6_9BRAD	20.63	16	3	3	258000	544000	1270000	1080000	1160000	1470000	214000	245000	5180000	5950000	3670000	2920000	0.22:0.47:1.10:0.94:1.00:1.28:0.18:0.21:4.48:5.15:3.17:2.53	839000	792000	4430000	1.06:1.00:5.59	27611	Bradyrhizobiaceae	Rhodopseudomonas	Uncharacterized protein OS=Rhodopseudomonas faecalis OX=99655 GN=BJ122_1288 PE=4 SV=1
5052	8226	tr|G2E1M7|G2E1M7_9GAMM	43.97	14	2	2	16300000	22100000	20900000	20300000	30900000	27800000	23300000	21400000	5180000	3530000	5320000	5090000	0.53:0.72:0.68:0.66:1.00:0.90:0.75:0.69:0.17:0.11:0.17:0.16	19900000	25800000	4780000	0.77:1.00:0.19	19772	Chromatiaceae	Thiorhodococcus	Shikimate kinase OS=Thiorhodococcus drewsii AZ1 OX=765913 GN=aroK PE=3 SV=1
988	748	tr|D3RPE2|D3RPE2_ALLVD	26.84	23	11	6	33200000	39100000	48500000	45400000	64000000	53600000	68500000	65100000	5130000	3890000	645000	3440000	0.52:0.61:0.76:0.71:1.00:0.84:1.07:1.02:0.08:0.06:0.02:0.05	44200000	62800000	3410000	0.70:1.00:0.05	58317	Chromatiaceae	Allochromatium	Indolepyruvate oxidoreductase subunit IorA OS=Allochromatium vinosum (strain ATCC 17899 / DSM 180 / NBRC 103801 / NCIMB 10441 / D) OX=572477 GN=Alvin_2623 PE=4 SV=1
2979	54345	tr|A0A6M1TQ59|A0A6M1TQ59_9RHOB	5.64	57	4	2	774000	101000	2480000	2790000	2900000	2960000	4530000	4300000	5120000	4390000	3830000	2660000	0.27:0.03:0.85:0.96:1.00:1.02:1.56:1.48:1.76:1.51:1.32:0.92	1710000	3670000	4030000	0.46:1.00:1.10	7282	Rhodobacteraceae	Rhodobacter	Cold-shock protein OS=Rhodobacter sp. HX-7-19 OX=2583234 GN=G5V65_15790 PE=4 SV=1
3507	25060	tr|A0A318TPC0|A0A318TPC0_9BRAD	28.21	5	4	3	2320000	2810000	910000	721000	578000	1170000	451000	660000	5100000	4770000	4890000	4220000	4.01:4.86:1.57:1.25:1.00:2.01:0.78:1.14:8.81:8.25:8.46:7.30	2670000	773000	4750000	3.46:1.00:6.14	61977	Bradyrhizobiaceae	Rhodopseudomonas	Fatty-acyl-CoA synthase OS=Rhodopseudomonas faecalis OX=99655 GN=BJ122_1217 PE=4 SV=1
5241	27987	tr|A0A5M6HWB7|A0A5M6HWB7_9RHIZ	26.19	11	2	2	18500000	20700000	14400000	8510000	16900000	13200000	30300000	30100000	5100000	6660000	3740000	4360000	1.09:1.22:0.85:0.50:1.00:0.78:1.79:1.78:0.30:0.39:0.22:0.26	15600000	23500000	5270000	0.67:1.00:0.22	33269	Blastochloridaceae	Blastochloris	Histone deacetylase family protein OS=Blastochloris sulfoviridis OX=50712 GN=F1193_11030 PE=3 SV=1
4184	28682	tr|A0A0D7F4G1|A0A0D7F4G1_RHOPL	24.38	9	2	2	2580000	2580000	1960000	906000	2490000	2880000	2680000	1720000	5060000	5320000	5530000	5660000	1.04:1.04:0.79:0.36:1.00:1.16:1.08:0.69:2.03:2.14:2.22:2.27	2010000	2520000	5390000	0.80:1.00:2.14	26666	Bradyrhizobiaceae	Rhodopseudomonas	Oxidoreductase OS=Rhodopseudomonas palustris OX=1076 GN=OO17_02985 PE=4 SV=1
144	672	tr|A0A4R3N7G7|A0A4R3N7G7_9GAMM	43.04	28	19	11	97600000	110000000	86500000	80100000	62500000	71500000	70500000	71600000	5050000	6140000	4770000	2970000	1.56:1.76:1.38:1.28:1.00:1.14:1.13:1.15:0.08:0.10:0.08:0.05	93600000	69100000	4880000	1.36:1.00:0.07	104818	Chromatiaceae	Thiobaca	Protein translocase subunit SecA OS=Thiobaca trueperi OX=127458 GN=secA PE=3 SV=1
1403	4410	tr|A0A4R3MT31|A0A4R3MT31_9GAMM	27.35	28	5	5	81900000	81100000	88400000	71500000	35600000	39200000	52100000	52900000	5050000	3030000	1000000	392000	2.30:2.28:2.48:2.01:1.00:1.10:1.46:1.49:0.14:0.09:0.03:0.02	80800000	44900000	2400000	1.80:1.00:0.05	11835	Chromatiaceae	Thiobaca	Sec translocon accessory complex subunit YajC OS=Thiobaca trueperi OX=127458 GN=yajC PE=3 SV=1
3029	4017	tr|A0A4R3N5I1|A0A4R3N5I1_9GAMM	25.03	9	4	4	5750000	6510000	8310000	8380000	20900000	18100000	12600000	13600000	5050000	8010000	7060000	5770000	0.27:0.31:0.40:0.40:1.00:0.86:0.60:0.65:0.24:0.38:0.34:0.28	7240000	16300000	6640000	0.44:1.00:0.41	77365	Chromatiaceae	Thiobaca	Phosphate acetyltransferase OS=Thiobaca trueperi OX=127458 GN=EDC35_103157 PE=3 SV=1
4759	31146	tr|A0A5M6HJB5|A0A5M6HJB5_9RHIZ	16.06	38	2	2	2440000	1320000	656000	476000	1580000	2290000	3630000	3210000	5050000	3220000	9880000	9110000	1.54:0.84:0.41:0.30:1.00:1.45:2.29:2.02:3.19:2.03:6.24:5.75	1430000	2860000	7490000	0.50:1.00:2.62	8284	Blastochloridaceae	Blastochloris	UPF0434 protein F1193_15980 OS=Blastochloris sulfoviridis OX=50712 GN=F1193_15980 PE=3 SV=1
4887	34198	tr|A0A318TBN8|A0A318TBN8_9BRAD	31.6	7	3	3	285000	276000	63800	0	326000	364000	203000	214000	5040000	4430000	9870000	4140000	0.87:0.85:0.20:0:1.00:1.11:0.62:0.65:15.46:13.58:30.26:12.70	208000	276000	5870000	0.75:1.00:21.24	32738	Bradyrhizobiaceae	Rhodopseudomonas	Thioredoxin OS=Rhodopseudomonas faecalis OX=99655 GN=BJ122_11273 PE=3 SV=1
1004	963	tr|A0A4R3N298|A0A4R3N298_9GAMM	29.4	34	8	8	224000000	216000000	255000000	250000000	247000000	277000000	293000000	332000000	5020000	3760000	3150000	419000	0.91:0.87:1.03:1.01:1.00:1.12:1.18:1.34:0.02:0.02:0.02:0.02	241000000	298000000	3820000	0.81:1.00:0.02	22106	Chromatiaceae	Thiobaca	50S ribosomal protein L25 OS=Thiobaca trueperi OX=127458 GN=rplY PE=3 SV=1
1113	4117	tr|A0A5M6HQV5|A0A5M6HQV5_9RHIZ	37.89	18	7	2	392000	540000	0	613000	1610000	3020000	2170000	3560000	5010000	4340000	6260000	6100000	0.24:0.34:0:0.38:1.00:1.87:1.35:2.21:3.11:2.69:3.88:3.79	638000	2880000	5630000	0.22:1.00:1.95	52346	Blastochloridaceae	Blastochloris	Glutamate synthase subunit beta OS=Blastochloris sulfoviridis OX=50712 GN=F1193_13470 PE=4 SV=1
3367	6438	tr|A0A4R3N5Y2|A0A4R3N5Y2_9GAMM	21.44	9	3	2	6430000	6680000	5680000	5240000	3710000	4140000	3780000	4520000	4970000	3930000	8700000	7060000	1.73:1.80:1.53:1.41:1.00:1.11:1.02:1.22:1.34:1.06:2.34:1.90	6010000	4030000	6160000	1.49:1.00:1.53	40797	Chromatiaceae	Thiobaca	Chaperone protein DnaJ OS=Thiobaca trueperi OX=127458 GN=dnaJ PE=3 SV=1
1100	22673	tr|A0A0S3Q0S3|A0A0S3Q0S3_9BRAD	31.84	18	9	2	192000	416000	84200	349000	801000	790000	1980000	2160000	4930000	6320000	7770000	9000000	0.24:0.52:0.11:0.44:1.00:0.99:2.47:2.69:6.15:7.90:9.71:11.24	260000	1430000	7010000	0.18:1.00:4.90	68515	Bradyrhizobiaceae	Variibacter	Chaperone protein DnaK OS=Variibacter gotjawalensis OX=1333996 GN=dnaK PE=2 SV=1
3452	23922	tr|A0A4R3MQE3|A0A4R3MQE3_9GAMM	37.64	22	4	3	11100000	11000000	9900000	9010000	12600000	10400000	13000000	13900000	4930000	5980000	4980000	4410000	0.88:0.87:0.79:0.72:1.00:0.82:1.03:1.10:0.39:0.47:0.40:0.35	10300000	12500000	5070000	0.82:1.00:0.41	26397	Chromatiaceae	Thiobaca	1-(5-phosphoribosyl)-5-[(5-phosphoribosylamino)methylideneamino] imidazole-4-carboxamide isomerase OS=Thiobaca trueperi OX=127458 GN=hisA PE=3 SV=1
1999	23051	tr|A0A525JPZ1|A0A525JPZ1_BRASZ	12.17	12	8	2	7410000	5680000	9530000	9340000	3460000	2500000	5970000	6410000	4910000	3950000	5900000	5350000	2.14:1.64:2.76:2.70:1.00:0.72:1.73:1.85:1.42:1.14:1.71:1.55	7990000	4830000	5020000	1.65:1.00:1.04	73081	Bradyrhizobiaceae	Bradyrhizobium	Elongation factor G OS=Bradyrhizobium sp. OX=376 GN=E7813_19070 PE=3 SV=1
609	1333	tr|A0A4R3MSK3|A0A4R3MSK3_9GAMM	59.32	35	10	10	88600000	91800000	109000000	95000000	93400000	86000000	87600000	82200000	4870000	3450000	4960000	4720000	0.95:0.98:1.17:1.02:1.00:0.92:0.94:0.88:0.05:0.04:0.05:0.05	96700000	87300000	4600000	1.11:1.00:0.05	39716	Chromatiaceae	Thiobaca	Histidinol-phosphate aminotransferase OS=Thiobaca trueperi OX=127458 GN=hisC PE=3 SV=1
3503	13583	tr|A0A348G2F3|A0A348G2F3_9RHIZ	31.94	14	3	3	22900000	22300000	36500000	33200000	38900000	46000000	33900000	32200000	4870000	6860000	2440000	3660000	0.59:0.57:0.94:0.85:1.00:1.18:0.87:0.83:0.13:0.18:0.06:0.09	28700000	37700000	5280000	0.76:1.00:0.14	20202	Blastochloridaceae	Blastochloris	Cache_2 domain-containing protein OS=Blastochloris tepida OX=2233851 GN=BLTE_24210 PE=4 SV=1
4891	35758	tr|A0A495VCQ6|A0A495VCQ6_9GAMM	39.48	17	3	3	22000000	23700000	18200000	16300000	9450000	25300000	34100000	34200000	4870000	4800000	4250000	5140000	2.32:2.51:1.93:1.72:1.00:2.67:3.61:3.62:0.52:0.51:0.45:0.54	20100000	25800000	4760000	0.78:1.00:0.18	20845	Chromatiaceae	Thiocapsa	Elongation factor P OS=Thiocapsa rosea OX=69360 GN=efp PE=3 SV=1
5396	32038	tr|A0A318TD82|A0A318TD82_9BRAD	18.8	15	2	2	1730000	285000	159000	970000	0	0	62200	21400	4850000	10500000	0	6950000	64.00:64.00:64.00:64.00:-:-:64.00:64.00:64.00:64.00:-:64.00	894000	41800	11200000	21.39:1.00:64.00	15043	Bradyrhizobiaceae	Rhodopseudomonas	Peptide methionine sulfoxide reductase MsrB OS=Rhodopseudomonas faecalis OX=99655 GN=msrB PE=3 SV=1
1619	22827	tr|A0A4R3MVA7|A0A4R3MVA7_9GAMM	11.56	31	7	4	7070000	7990000	8580000	8300000	6510000	6940000	4710000	7020000	4830000	4600000	661000	2850000	1.09:1.23:1.32:1.27:1.00:1.07:0.72:1.08:0.74:0.71:0.10:0.44	7980000	6300000	3240000	1.27:1.00:0.52	37506	Chromatiaceae	Thiobaca	Inner membrane peptidase OS=Thiobaca trueperi OX=127458 GN=EDC35_10725 PE=3 SV=1
4119	53621	tr|M4ZGQ0|M4ZGQ0_9BRAD	20.24	21	3	2	3600000	1900000	1820000	3040000	5600000	5380000	7180000	7470000	4830000	24100000	25700000	25200000	0.64:0.34:0.33:0.54:1.00:0.96:1.28:1.33:0.86:4.31:4.60:4.50	2630000	6460000	20400000	0.41:1.00:3.16	32900	Bradyrhizobiaceae	Bradyrhizobium	Parvulin-like PPIase OS=Bradyrhizobium oligotrophicum S58 OX=1245469 GN=S58_70520 PE=3 SV=1
2948	1809	tr|A0A4R3MYA7|A0A4R3MYA7_9GAMM	73.99	24	4	4	200000000	182000000	197000000	166000000	111000000	94700000	165000000	153000000	4800000	4780000	3970000	4020000	1.81:1.65:1.78:1.50:1.00:0.86:1.49:1.39:0.04:0.04:0.04:0.04	186000000	131000000	4420000	1.42:1.00:0.03	15774	Chromatiaceae	Thiobaca	50S ribosomal protein L9 OS=Thiobaca trueperi OX=127458 GN=rplI PE=3 SV=1
2523	59427	tr|A0A7W6SHL0|A0A7W6SHL0_9BRAD	5.52	13	4	2	10800000	12600000	2500000	124000	1240000	469000	580000	10500000	4790000	5100000	5670000	5940000	8.71:10.12:2.01:0.10:1.00:0.38:0.47:8.48:3.86:4.11:4.57:4.78	6510000	3460000	5370000	1.88:1.00:1.55	53883	Bradyrhizobiaceae	Bradyrhizobium	Flagellin-like hook-associated protein FlgL OS=Bradyrhizobium sp. cir1 OX=1445730 GN=GGD63_001344 PE=4 SV=1
2691	2009	tr|A0A4R3MS17|A0A4R3MS17_9GAMM	37.4	18	6	5	9190000	9190000	10600000	9480000	15300000	15200000	16900000	14500000	4790000	2160000	2020000	4530000	0.60:0.60:0.69:0.62:1.00:0.99:1.10:0.95:0.31:0.14:0.13:0.30	9600000	15500000	3700000	0.62:1.00:0.24	44892	Chromatiaceae	Thiobaca	Tyrosine--tRNA ligase OS=Thiobaca trueperi OX=127458 GN=tyrS PE=3 SV=1
224	254	tr|A0A1H3C7T6|A0A1H3C7T6_ALLWA	59.45	40	10	3	123000000	126000000	90100000	120000000	134000000	126000000	95400000	93200000	4760000	4400000	3030000	3150000	0.92:0.94:0.67:0.90:1.00:0.95:0.71:0.70:0.04:0.03:0.02:0.02	115000000	112000000	3840000	1.02:1.00:0.03	45392	Chromatiaceae	Allochromatium	Enolase OS=Allochromatium warmingii OX=61595 GN=eno PE=3 SV=1
3132	3440	tr|A0A4R3MUZ2|A0A4R3MUZ2_9GAMM	45.14	17	4	4	27100000	32500000	41300000	19900000	25700000	24800000	21700000	21600000	4750000	4710000	3310000	4190000	1.05:1.27:1.61:0.78:1.00:0.96:0.84:0.84:0.18:0.18:0.13:0.16	33800000	23400000	4270000	1.44:1.00:0.18	41314	Chromatiaceae	Thiobaca	Sulfide:quinone oxidoreductase OS=Thiobaca trueperi OX=127458 GN=EDC35_108184 PE=4 SV=1
213	698	tr|A0A4R3MUR5|A0A4R3MUR5_9GAMM	53.7	25	21	9	36500000	37700000	43500000	38300000	36800000	31700000	30000000	25700000	4730000	6080000	4640000	4280000	0.99:1.02:1.18:1.04:1.00:0.86:0.81:0.70:0.13:0.17:0.13:0.12	39000000	31000000	4930000	1.26:1.00:0.16	101179	Chromatiaceae	Thiobaca	Translation initiation factor IF-2 OS=Thiobaca trueperi OX=127458 GN=infB PE=3 SV=1
2865	51726	tr|A0A318T733|A0A318T733_9BRAD	0	27	4	3	0	0	126000	0	0	159000	168000	197000	4730000	2300000	1220000	1480000	-:-:64.00:-:-:64.00:64.00:64.00:64.00:64.00:64.00:64.00	126000	341000	2550000	0.37:1.00:7.47	20908	Bradyrhizobiaceae	Rhodopseudomonas	Lipoprotein-anchoring transpeptidase ErfK/SrfK OS=Rhodopseudomonas faecalis OX=99655 GN=BJ122_13215 PE=3 SV=1
3984	25616	tr|A0A0H5B7A1|A0A0H5B7A1_BLAVI	37.62	14	3	2	616000	743000	870000	703000	2650000	2700000	1290000	1310000	4730000	3870000	7060000	6560000	0.23:0.28:0.33:0.26:1.00:1.02:0.49:0.49:1.78:1.46:2.66:2.47	733000	2390000	6990000	0.31:1.00:2.92	33477	Blastochloridaceae	Blastochloris	D-malate degradation protein R OS=Blastochloris viridis OX=1079 GN=dmlR_1 PE=3 SV=1
1688	53083	tr|A0A336JVN8|A0A336JVN8_9BRAD	0	26	6	2	31800	0	0	0	0	0	0	13200	4700000	6180000	6030000	5230000	64.00:-:-:-:-:-:-:64.00:64.00:64.00:64.00:64.00	31800	13200	5530000	2.41:1.00:64.00	32551	Bradyrhizobiaceae	Rhodopseudomonas	Electron transfer flavoprotein alpha subunit apoprotein OS=Rhodopseudomonas pentothenatexigens OX=999699 GN=SAMN05892882_14021 PE=3 SV=1
2861	51499	tr|A0A2T4J6Z3|A0A2T4J6Z3_RHOBL	1.93	17	3	3	3000000	539000	131000	5430000	312000	0	77800	5500000	4700000	2910000	822000	1010000	9.62:1.73:0.42:17.42:1.00:0:0.25:17.63:15.08:9.32:2.64:3.22	2380000	2080000	2940000	1.15:1.00:1.41	30188	Rhodobacteraceae	Rhodobacter	Universal stress protein OS=Rhodobacter blasticus DSM 2131 OX=1188250 GN=C5F44_12810 PE=3 SV=1
4491	26239	tr|I3Y6N7|I3Y6N7_THIV6	9.37	3	2	2	3790000	3640000	2640000	3070000	3580000	5650000	7510000	10800000	4700000	4150000	1920000	1700000	1.06:1.02:0.74:0.86:1.00:1.58:2.10:3.01:1.31:1.16:0.54:0.47	3640000	9500000	4630000	0.38:1.00:0.49	97220	Chromatiaceae	Thiocystis	Acyl-CoA synthetase (NDP forming) OS=Thiocystis violascens (strain ATCC 17096 / DSM 198 / 6111) OX=765911 GN=Thivi_0599 PE=4 SV=1
5382	30482	tr|A0A318TFQ0|A0A318TFQ0_9BRAD	0	13	2	2	188000	94400	49100	0	27800	0	0	0	4700000	4900000	4730000	4360000	6.74:3.39:1.76:0:1.00:0:0:0:64.00:64.00:64.00:64.00	110000	27800	4670000	3.97:1.00:64.00	26932	Bradyrhizobiaceae	Rhodopseudomonas	5-oxoprolinase subunit A OS=Rhodopseudomonas faecalis OX=99655 GN=pxpA PE=3 SV=1
3385	24906	tr|A0A318T896|A0A318T896_9BRAD	20.49	15	5	5	6920000	4190000	4570000	3260000	1970000	2480000	3500000	2390000	4670000	11600000	13200000	12200000	3.52:2.13:2.32:1.66:1.00:1.26:1.78:1.22:2.37:5.92:6.71:6.18	4740000	2680000	10400000	1.77:1.00:3.88	39257	Bradyrhizobiaceae	Rhodopseudomonas	UDP-N-acetylglucosamine--N-acetylmuramyl-(pentapeptide) pyrophosphoryl-undecaprenol N-acetylglucosamine transferase OS=Rhodopseudomonas faecalis OX=99655 GN=murG PE=3 SV=1
2279	1609	tr|A0A4R3N3M8|A0A4R3N3M8_9GAMM	21.65	19	4	3	49000000	41400000	46700000	37300000	28500000	25900000	33600000	31800000	4660000	227000	4190000	5490000	1.72:1.45:1.64:1.31:1.00:0.91:1.18:1.12:0.16:0.02:0.15:0.19	43600000	29900000	3670000	1.46:1.00:0.12	30925	Chromatiaceae	Thiobaca	4-hydroxy-tetrahydrodipicolinate synthase OS=Thiobaca trueperi OX=127458 GN=dapA PE=3 SV=1
3300	23313	tr|A0A5M6I3C5|A0A5M6I3C5_9RHIZ	61.74	11	5	4	33300000	26300000	38800000	29900000	26700000	27900000	30300000	33200000	4650000	5340000	5170000	4980000	1.24:0.98:1.45:1.12:1.00:1.04:1.13:1.24:0.17:0.20:0.19:0.19	32100000	29500000	5040000	1.09:1.00:0.17	77409	Blastochloridaceae	Blastochloris	M3 family metallopeptidase OS=Blastochloris sulfoviridis OX=50712 GN=F1193_05485 PE=3 SV=1
4746	28695	tr|A0A318TTS6|A0A318TTS6_9BRAD	11.46	7	2	2	0	0	0	0	11900	44400	0	0	4650000	5400000	6310000	6750000	0:0:0:0:1.00:3.72:0:0:64.00:64.00:64.00:64.00	0	28200	5780000	0:1.00:64.00	30377	Bradyrhizobiaceae	Rhodopseudomonas	Uncharacterized protein OS=Rhodopseudomonas faecalis OX=99655 GN=BJ122_1011 PE=3 SV=1
4866	29039	tr|A0A318T9R2|A0A318T9R2_9BRAD	0	7	2	2	0	14700	0	0	6930	0	0	0	4650000	4910000	4630000	4760000	0:2.12:0:0:1.00:0:0:0:64.00:64.00:64.00:64.00	14700	6930	4740000	2.12:1.00:64.00	46944	Bradyrhizobiaceae	Rhodopseudomonas	Alpha-galactosidase OS=Rhodopseudomonas faecalis OX=99655 GN=BJ122_1212 PE=3 SV=1
4751	29026	tr|A0A4R3MZQ1|A0A4R3MZQ1_9GAMM	1.99	15	3	3	4710000	4640000	5300000	4700000	13000000	4410000	4750000	4160000	4640000	5840000	760000	5060000	0.36:0.36:0.41:0.36:1.00:0.34:0.37:0.32:0.36:0.45:0.06:0.39	4840000	12900000	4080000	0.38:1.00:0.32	25731	Chromatiaceae	Thiobaca	Ribonuclease PH OS=Thiobaca trueperi OX=127458 GN=rph PE=3 SV=1
286	396	tr|A0A4R3N734|A0A4R3N734_9GAMM	70.77	57	18	9	42500000	41000000	37000000	38800000	25300000	40900000	39900000	35100000	4570000	4000000	4230000	3910000	1.68:1.62:1.46:1.53:1.00:1.62:1.58:1.39:0.18:0.16:0.17:0.15	40300000	46400000	5080000	0.87:1.00:0.11	54586	Chromatiaceae	Thiobaca	Fumarate hydratase class I OS=Thiobaca trueperi OX=127458 GN=EDC35_101642 PE=3 SV=1
4093	26569	tr|A0A318TYY2|A0A318TYY2_9BRAD	17.57	5	3	3	3980000	4930000	3110000	3320000	2570000	2460000	2540000	1990000	4530000	3950000	3160000	2810000	1.55:1.92:1.21:1.29:1.00:0.96:0.99:0.78:1.76:1.54:1.23:1.09	3830000	2450000	3610000	1.56:1.00:1.47	49691	Bradyrhizobiaceae	Rhodopseudomonas	Glutamate-1-semialdehyde 2 1-aminomutase OS=Rhodopseudomonas faecalis OX=99655 GN=BJ122_10264 PE=3 SV=1
482	20876	tr|A0A348FWY2|A0A348FWY2_9RHIZ	36.41	7	14	2	0	0	1860000	2040000	816000	902000	1070000	588000	4490000	4560000	5890000	4840000	0:0:2.27:2.50:1.00:1.10:1.31:0.72:5.50:5.59:7.22:5.93	1950000	943000	4950000	2.07:1.00:5.25	259282	Blastochloridaceae	Blastochloris	Kinesin OS=Blastochloris tepida OX=2233851 GN=BLTE_05000 PE=4 SV=1
146	50351	tr|A0A2A4EVL4|A0A2A4EVL4_9PSED	41.81	13	20	2	51800000	43300000	33800000	33200000	23200000	21900000	51200000	44900000	4470000	3620000	2940000	2190000	2.23:1.87:1.46:1.43:1.00:0.95:2.21:1.93:0.19:0.16:0.13:0.09	40500000	35300000	3310000	1.15:1.00:0.09	156278	Pseudomonadaceae	Pseudomonas	DNA-directed RNA polymerase subunit beta' OS=Pseudomonas acidophila OX=1912599 GN=rpoC PE=3 SV=1
1277	50921	tr|F7QMA4|F7QMA4_9BRAD	9.41	12	8	2	1540000	1620000	811000	914000	316000	285000	943000	1060000	4460000	3900000	1050000	1270000	4.87:5.13:2.57:2.89:1.00:0.90:2.98:3.34:14.12:12.34:3.33:4.02	1220000	650000	2670000	1.88:1.00:4.11	89472	Bradyrhizobiaceae	0	Lon protease OS=Bradyrhizobiaceae bacterium SG-6C OX=709797 GN=lon PE=2 SV=1
4931	61070	tr|A0A5M6I2J7|A0A5M6I2J7_9RHIZ	39.26	11	3	2	681000	1070000	1050000	907000	1680000	1250000	1830000	2400000	4440000	4710000	4100000	3720000	0.41:0.64:0.62:0.54:1.00:0.75:1.09:1.43:2.65:2.80:2.44:2.22	1150000	1790000	4240000	0.64:1.00:2.37	29279	Blastochloridaceae	Blastochloris	Lytic murein transglycosylase OS=Blastochloris sulfoviridis OX=50712 GN=F1193_05645 PE=4 SV=1 Membrane-bound lytic murein transglycosylase B OS=Blastochloris viridis OX=1079 GN=BV133_442 PE=4 SV=1
1064	285	tr|A0A318TGU2|A0A318TGU2_9BRAD	41.3	36	10	6	46800000	43900000	31300000	32600000	1110000	693000	2060000	1850000	4380000	4710000	4680000	4330000	42.23:39.62:28.26:29.45:1.00:0.63:1.86:1.67:3.96:4.25:4.22:3.91	38700000	1490000	4530000	25.95:1.00:3.04	44520	Bradyrhizobiaceae	Rhodopseudomonas	Amino acid/amide ABC transporter substrate-binding protein (HAAT family) OS=Rhodopseudomonas faecalis OX=99655 GN=BJ122_10812 PE=4 SV=1
5378	29691	tr|A0A318T996|A0A318T996_9BRAD	24.98	7	2	2	0	170000	58600	0	0	53600	54300	34800	4370000	4530000	3440000	4580000	-:64.00:64.00:-:-:64.00:64.00:64.00:64.00:64.00:64.00:64.00	114000	47600	4230000	2.40:1.00:64.00	47870	Bradyrhizobiaceae	Rhodopseudomonas	2-methylcitrate dehydratase PrpD OS=Rhodopseudomonas faecalis OX=99655 GN=BJ122_12447 PE=3 SV=1
536	631	tr|D3RVU2|D3RVU2_ALLVD	14.33	25	16	6	33200000	26400000	12700000	27100000	20800000	19800000	34700000	36000000	4350000	5610000	248000	856000	1.59:1.27:0.61:1.30:1.00:0.95:1.66:1.73:0.21:0.27:0.02:0.04	24800000	27800000	2880000	0.89:1.00:0.10	74216	Chromatiaceae	Allochromatium	Elongation factor G OS=Allochromatium vinosum (strain ATCC 17899 / DSM 180 / NBRC 103801 / NCIMB 10441 / D) OX=572477 GN=Alvin_2184 PE=3 SV=1
2640	51421	tr|A0A5H2Z6W8|A0A5H2Z6W8_9BRAD	40.29	16	6	3	491000	806000	517000	520000	4220000	150000	548000	1380000	4340000	6100000	7740000	5090000	0.12:0.19:0.12:0.12:1.00:0.04:0.13:0.33:1.03:1.45:1.84:1.21	584000	1570000	5820000	0.37:1.00:3.70	61574	Bradyrhizobiaceae	Bradyrhizobium	Fumarate hydratase class I OS=Bradyrhizobium sp. SG09 OX=2599805 GN=SG09_68270 PE=3 SV=1
2858	27062	tr|A0A431MAA4|A0A431MAA4_9BRAD	26.6	18	4	2	15900000	15600000	14000000	12900000	12600000	11000000	11600000	9150000	4310000	3760000	1540000	2520000	1.26:1.25:1.12:1.02:1.00:0.88:0.92:0.73:0.34:0.30:0.12:0.20	14600000	11100000	3030000	1.32:1.00:0.27	32223	Bradyrhizobiaceae	0	Electron transfer flavoprotein subunit alpha/FixB family protein OS=Bradyrhizobiaceae bacterium OX=2072420 GN=EKK40_02995 PE=3 SV=1
217	1030	tr|A0A4V2V1K9|A0A4V2V1K9_9GAMM	33.9	20	16	11	18900000	16500000	17300000	18700000	26300000	24300000	17000000	15900000	4270000	5840000	5930000	6510000	0.72:0.62:0.66:0.71:1.00:0.92:0.64:0.60:0.16:0.22:0.22:0.25	17800000	21300000	5640000	0.84:1.00:0.26	105599	Chromatiaceae	Thiobaca	Isoleucine--tRNA ligase OS=Thiobaca trueperi OX=127458 GN=ileS PE=3 SV=1
5395	31979	tr|A0A318TAK9|A0A318TAK9_9BRAD	23.45	14	2	2	1450000	1120000	1290000	1280000	430000	424000	546000	238000	4270000	3850000	24600000	3660000	3.37:2.59:2.99:2.97:1.00:0.99:1.27:0.55:9.94:8.95:57.29:8.51	1280000	410000	9100000	3.13:1.00:22.23	19851	Bradyrhizobiaceae	Rhodopseudomonas	ATP-dependent protease subunit HslV OS=Rhodopseudomonas faecalis OX=99655 GN=hslV PE=3 SV=1
943	801	tr|A0A4R3N125|A0A4R3N125_9GAMM	57.56	37	7	4	82000000	73900000	71200000	83900000	35700000	33200000	71900000	72500000	4240000	3100000	3420000	4160000	2.30:2.07:1.99:2.35:1.00:0.93:2.01:2.03:0.12:0.09:0.10:0.12	77800000	53300000	3900000	1.46:1.00:0.07	24457	Chromatiaceae	Thiobaca	50S ribosomal protein L1 OS=Thiobaca trueperi OX=127458 GN=rplA PE=3 SV=1
2791	24100	tr|A0A5M6I551|A0A5M6I551_9RHIZ	40.74	37	6	3	114000	0	66000	102000	324000	356000	509000	11800000	4240000	4490000	2680000	2460000	0.35:0:0.20:0.32:1.00:1.10:1.57:36.37:13.09:13.88:8.29:7.59	141000	3280000	3470000	0.04:1.00:1.06	22122	Blastochloridaceae	Blastochloris	Polyhydroxyalkanoate synthesis repressor PhaR OS=Blastochloris sulfoviridis OX=50712 GN=phaR PE=4 SV=1
1166	21783	tr|A0A6P1DVY0|A0A6P1DVY0_9GAMM	49.58	16	6	4	14100000	13900000	12600000	14400000	15400000	17400000	15800000	15300000	4210000	4050000	5290000	4120000	0.91:0.90:0.81:0.93:1.00:1.13:1.02:0.99:0.27:0.26:0.34:0.27	13700000	16000000	4480000	0.86:1.00:0.28	67256	Chromatiaceae	Thiorhodococcus	50S ribosomal subunit assembly factor BipA OS=Thiorhodococcus mannitoliphagus OX=329406 GN=typA PE=3 SV=1
4593	26741	tr|A0A4R3N4N4|A0A4R3N4N4_9GAMM	37.45	14	3	3	21600000	23600000	17900000	15900000	30900000	28700000	25700000	26900000	4210000	2040000	2330000	3260000	0.70:0.76:0.58:0.51:1.00:0.93:0.83:0.87:0.14:0.07:0.08:0.11	19800000	29300000	3200000	0.68:1.00:0.11	41606	Chromatiaceae	Thiobaca	Carbamoyl-phosphate synthase small chain OS=Thiobaca trueperi OX=127458 GN=carA PE=3 SV=1
3891	25235	tr|A0A318TIB0|A0A318TIB0_9BRAD	0	11	3	3	0	0	0	938000	239000	401000	351000	70000	4200000	4050000	4090000	4360000	0:0:0:3.92:1.00:1.68:1.47:0.29:17.56:16.94:17.10:18.22	938000	406000	4180000	2.31:1.00:10.29	45828	Bradyrhizobiaceae	Rhodopseudomonas	Homoserine dehydrogenase OS=Rhodopseudomonas faecalis OX=99655 GN=BJ122_10631 PE=3 SV=1
572	976	tr|A0A5M6HMB9|A0A5M6HMB9_9RHIZ	35.31	36	11	5	52200000	54400000	33300000	29000000	31400000	28200000	53600000	46900000	4170000	4070000	1570000	2080000	1.66:1.73:1.06:0.92:1.00:0.90:1.71:1.49:0.13:0.13:0.05:0.07	42200000	40000000	3070000	1.06:1.00:0.08	48445	Blastochloridaceae	Blastochloris	ABC transporter substrate-binding protein OS=Blastochloris sulfoviridis OX=50712 GN=F1193_15345 PE=4 SV=1
3395	26826	tr|A0A348FY89|A0A348FY89_9RHIZ	13.48	9	4	2	196000	0	797000	666000	72100	203000	420000	354000	4150000	1100000	2000000	752000	2.72:0:11.05:9.25:1.00:2.82:5.83:4.91:57.61:15.19:27.68:10.44	666000	290000	2000000	2.29:1.00:6.89	65221	Blastochloridaceae	Blastochloris	Glutamine--fructose-6-phosphate aminotransferase [isomerizing] OS=Blastochloris tepida OX=2233851 GN=glmS PE=3 SV=1
5182	56890	tr|A0A2M8ZDU3|A0A2M8ZDU3_9BRAD	22.41	12	2	2	242000	293000	1990000	2230000	1240000	1150000	1830000	1720000	4150000	4680000	2770000	3330000	0.20:0.24:1.61:1.80:1.00:0.93:1.48:1.39:3.35:3.78:2.24:2.69	1190000	1490000	3990000	0.80:1.00:2.69	27238	Bradyrhizobiaceae	Afipia	Uncharacterized protein OS=Afipia broomeae OX=56946 GN=BKA77_0395 PE=4 SV=1
4914	55591	tr|A0A2T0P0S1|A0A2T0P0S1_RHITR	12.35	27	3	3	137000	0	0	11900	594000	319000	257000	54600	4130000	2650000	3500000	3910000	0.23:0:0:0.02:1.00:0.54:0.43:0.09:6.95:4.46:5.90:6.58	74600	348000	3550000	0.21:1.00:10.20	14201	Rhizobiaceae	Rhizobium	PTS system mannose-specific IIA component OS=Rhizobium tropici OX=398 GN=NA75_110128 PE=4 SV=1
1152	1166	tr|G2E0D4|G2E0D4_9GAMM	32.84	62	8	7	188000000	185000000	282000000	238000000	172000000	176000000	151000000	162000000	4120000	14500000	5390000	5670000	1.10:1.08:1.64:1.39:1.00:1.03:0.88:0.94:0.02:0.08:0.03:0.03	223000000	165000000	8290000	1.35:1.00:0.05	13301	Chromatiaceae	Thiorhodococcus	50S ribosomal protein L14 OS=Thiorhodococcus drewsii AZ1 OX=765913 GN=rplN PE=3 SV=1
3175	6002	tr|A0A4R3N173|A0A4R3N173_9GAMM	17.72	14	4	4	9710000	8440000	9740000	11200000	10200000	13200000	12900000	13800000	4120000	3840000	8620000	2810000	0.95:0.83:0.95:1.10:1.00:1.29:1.26:1.35:0.40:0.38:0.84:0.28	9980000	12500000	4850000	0.80:1.00:0.39	32850	Chromatiaceae	Thiobaca	Uncharacterized protein (TIGR00255 family) OS=Thiobaca trueperi OX=127458 GN=EDC35_10345 PE=4 SV=1
4230	61085	tr|I1X2Q4|I1X2Q4_9BRAD	29.74	21	4	2	767000	553000	767000	316000	488000	805000	125000	442000	4100000	4750000	4230000	3990000	1.57:1.13:1.57:0.65:1.00:1.65:0.26:0.91:8.41:9.74:8.68:8.18	601000	465000	4270000	1.29:1.00:9.18	20327	Bradyrhizobiaceae	Bradyrhizobium	DNA-directed RNA polymerase subunit beta (Fragment) OS=Bradyrhizobium sp. Ma9.4 OX=443605 GN=rpoB PE=4 SV=1
4824	4699	tr|A0A495VDY4|A0A495VDY4_9GAMM	45.1	37	3	3	38900000	47000000	47200000	46200000	24800000	24600000	26900000	29400000	4090000	4660000	2620000	2460000	1.57:1.90:1.90:1.86:1.00:0.99:1.09:1.19:0.17:0.19:0.11:0.10	44800000	26400000	3510000	1.70:1.00:0.13	9063	Chromatiaceae	Thiocapsa	30S ribosomal protein S18 OS=Thiocapsa rosea OX=69360 GN=rpsR PE=3 SV=1
5101	29546	tr|A0A4R3MZH9|A0A4R3MZH9_9GAMM	18.92	9	2	2	13500000	11000000	9570000	8620000	6440000	5310000	8110000	8950000	4080000	5120000	1690000	2300000	2.10:1.70:1.49:1.34:1.00:0.82:1.26:1.39:0.63:0.79:0.26:0.36	10700000	7600000	3300000	1.40:1.00:0.43	28834	Chromatiaceae	Thiobaca	Indole-3-glycerol phosphate synthase OS=Thiobaca trueperi OX=127458 GN=trpC PE=3 SV=1
4148	6539	tr|A0A4R3MST2|A0A4R3MST2_9GAMM	13.99	3	2	2	7410000	6190000	8780000	9000000	5920000	5650000	8560000	8910000	4020000	521000	1980000	1110000	1.25:1.04:1.48:1.52:1.00:0.95:1.45:1.51:0.68:0.09:0.33:0.19	7850000	7260000	2030000	1.08:1.00:0.28	72420	Chromatiaceae	Thiobaca	Cytochrome c-type biogenesis protein CcmF OS=Thiobaca trueperi OX=127458 GN=EDC35_11433 PE=3 SV=1
1201	1582	tr|A0A4R3N2N9|A0A4R3N2N9_9GAMM	12.78	19	9	8	17500000	8570000	26900000	23100000	20500000	16800000	7270000	4440000	3990000	0	1430000	472000	0.85:0.42:1.31:1.13:1.00:0.82:0.35:0.22:0.19:0:0.07:0.02	21400000	18900000	2400000	1.13:1.00:0.13	81311	Chromatiaceae	Thiobaca	Uncharacterized protein DUF3141 OS=Thiobaca trueperi OX=127458 GN=EDC35_104168 PE=4 SV=1
5374	29305	tr|A0A0S3PYJ3|A0A0S3PYJ3_9BRAD	14.37	3	2	2	0	0	0	0	683000	464000	0	0	3990000	5130000	4410000	3700000	0:0:0:0:1.00:0.68:0:0:5.85:7.51:6.46:5.41	0	573000	4310000	0:1.00:7.51	52825	Bradyrhizobiaceae	Variibacter	Probable cytosol aminopeptidase OS=Variibacter gotjawalensis OX=1333996 GN=pepA PE=3 SV=1
3363	5001	tr|I3YF98|I3YF98_THIV6	15.56	13	5	3	18700000	21400000	19900000	20100000	11300000	10800000	15700000	15100000	3980000	112000	0	597000	1.65:1.89:1.76:1.77:1.00:0.96:1.38:1.33:0.35:0.02:0:0.05	20000000	13200000	2340000	1.52:1.00:0.18	52035	Chromatiaceae	Thiocystis	Glutamyl-tRNA(Gln) amidotransferase subunit A OS=Thiocystis violascens (strain ATCC 17096 / DSM 198 / 6111) OX=765911 GN=gatA PE=3 SV=1
3496	5839	tr|A0A4V2V1N9|A0A4V2V1N9_9GAMM	52.88	14	3	3	20800000	14300000	24000000	25200000	25100000	24800000	33000000	26100000	3920000	4030000	4640000	4020000	0.83:0.57:0.96:1.01:1.00:0.99:1.32:1.04:0.16:0.16:0.18:0.16	21300000	27200000	4160000	0.78:1.00:0.15	27573	Chromatiaceae	Thiobaca	Pyrroline-5-carboxylate reductase OS=Thiobaca trueperi OX=127458 GN=proC PE=3 SV=1
4062	8084	tr|A0A318TGX7|A0A318TGX7_9BRAD	24.54	12	2	2	6800000	4870000	3090000	2420000	1230000	1100000	1550000	1290000	3900000	5400000	4240000	2390000	5.54:3.97:2.52:1.97:1.00:0.90:1.26:1.05:3.17:4.40:3.45:1.95	4710000	1290000	3980000	3.65:1.00:3.08	32829	Bradyrhizobiaceae	Rhodopseudomonas	Uncharacterized protein OS=Rhodopseudomonas faecalis OX=99655 GN=BJ122_104110 PE=4 SV=1
5088	65795	tr|A0A348MT08|A0A348MT08_9RHOB	24.46	9	3	2	647000	564000	4040000	4140000	40300	151000	210000	339000	3900000	4390000	7450000	4190000	16.06:14.00:64.00:64.00:1.00:3.75:5.20:8.41:64.00:64.00:64.00:64.00	2350000	185000	4980000	12.69:1.00:26.94	52109	Rhodobacteraceae	Rhodobacter	Branched-chain amino acid ABC transporter substrate-binding protein OS=Rhodobacter sp. OX=1062 GN=DCR25_08865 PE=4 SV=1
5145	7949	tr|A0A4R3N3R3|A0A4R3N3R3_9GAMM	58.48	5	2	2	105000000	132000000	139000000	106000000	47700000	51100000	57900000	63300000	3870000	3240000	5420000	4390000	2.20:2.77:2.91:2.23:1.00:1.07:1.21:1.33:0.08:0.07:0.11:0.09	120000000	55000000	4230000	2.19:1.00:0.08	25996	Chromatiaceae	Thiobaca	Thiol:disulfide interchange protein OS=Thiobaca trueperi OX=127458 GN=EDC35_104184 PE=3 SV=1
[truncated: 462 more rows]
